# Supplementary material for: Staphylococcus aureus Transcriptome Architecture: From Laboratory to Infection-Mimicking Conditions
Source: PubMed Central journal article supplement (PMC4818034; doi:10.1371/journal.pgen.1005962), 2016-04-01

virulence associated genes

SAOUHSC\_02803 - fnbA  
fibronectin-binding protein A

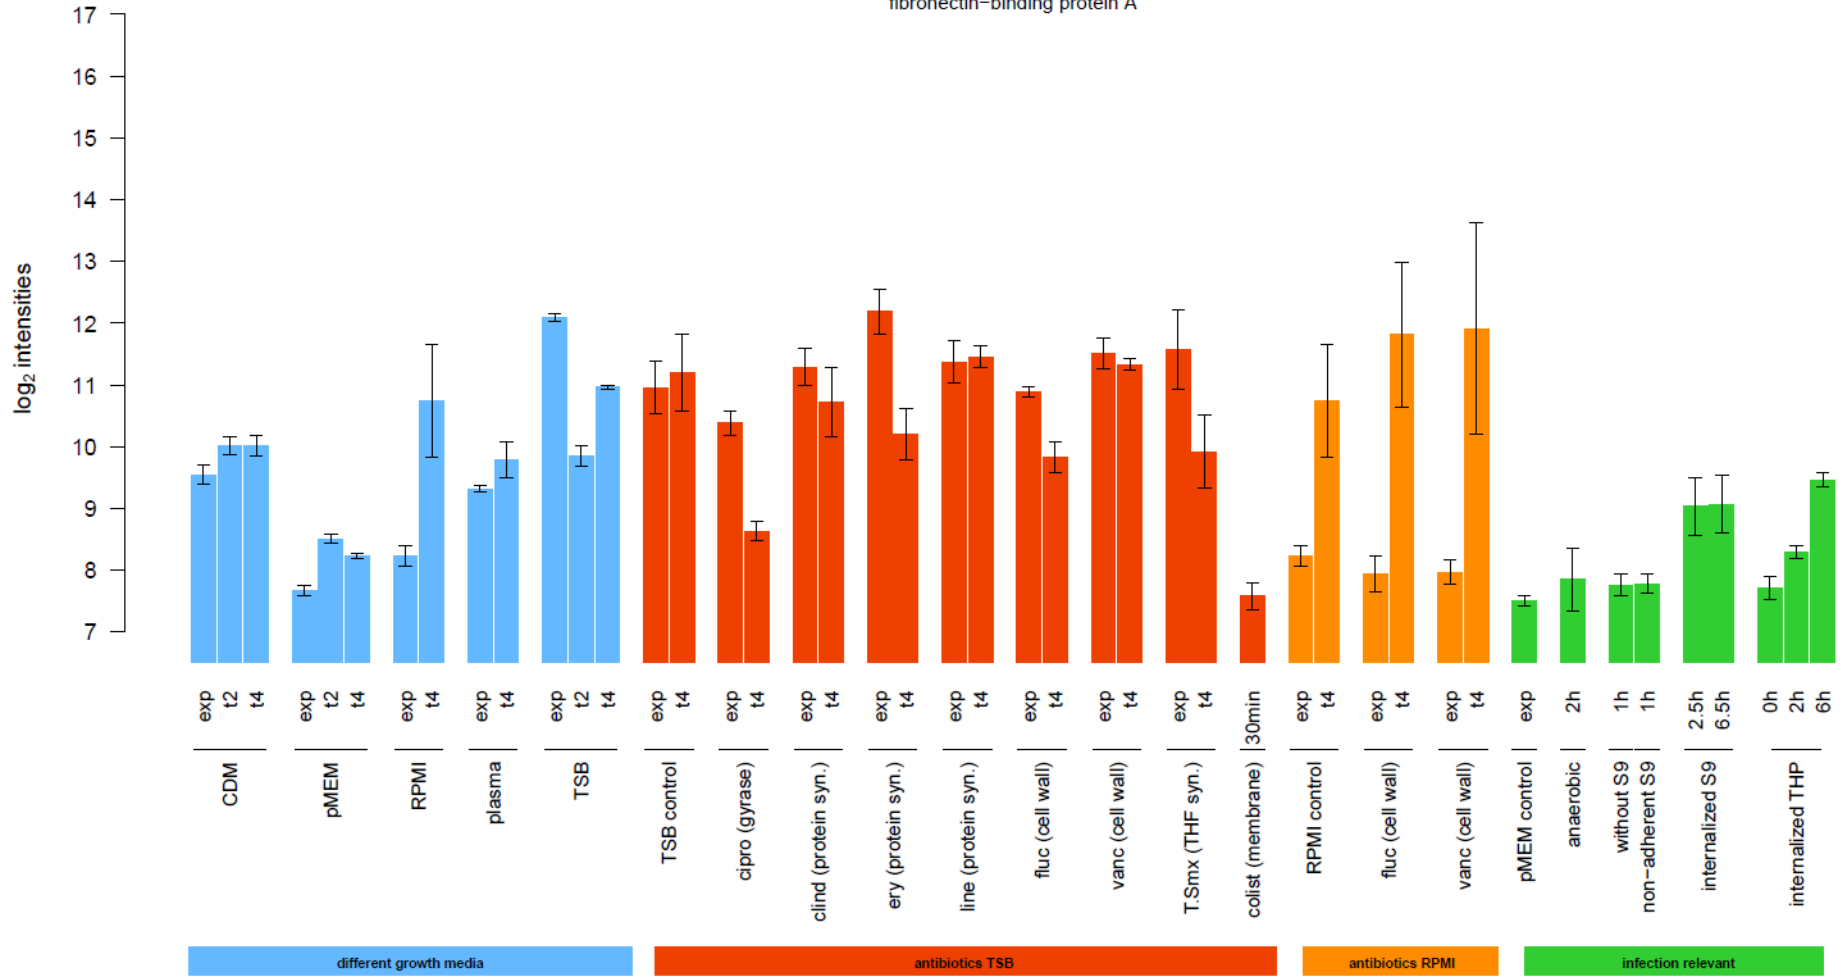

SAOUHSC\_02802 - fnbB  
fibronectin binding protein B

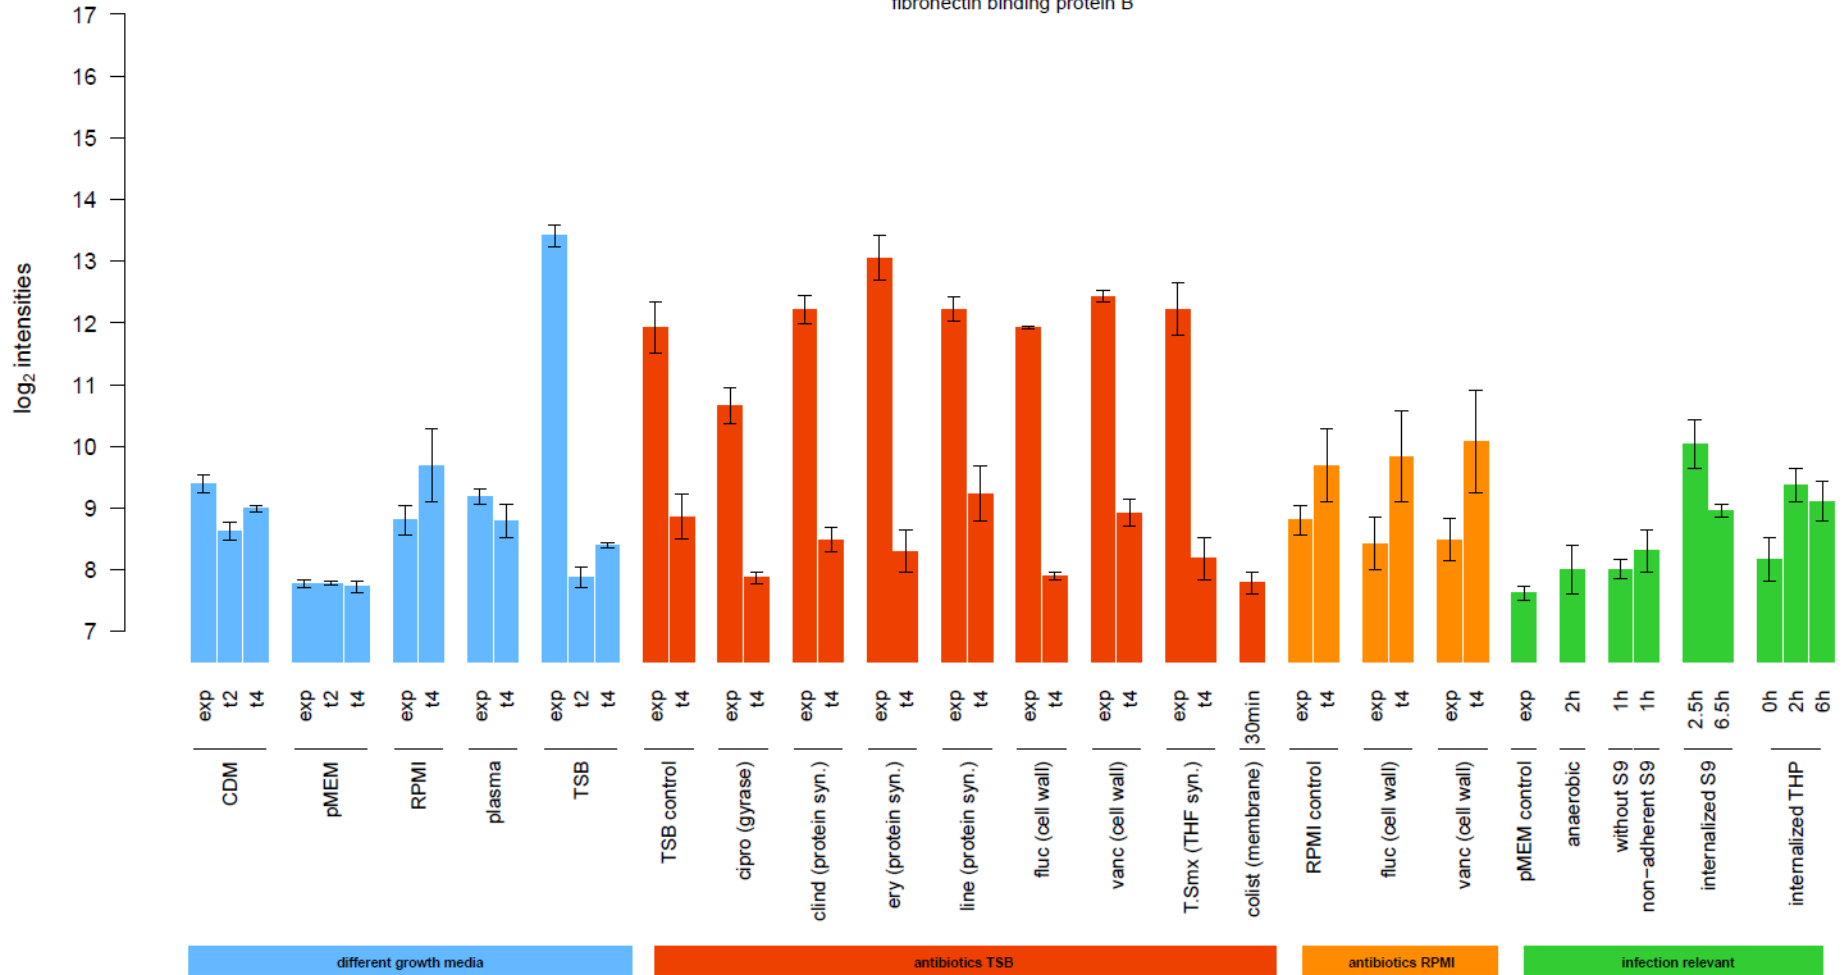

SAOUHSC\_00812 - clfA  
clumping factor A

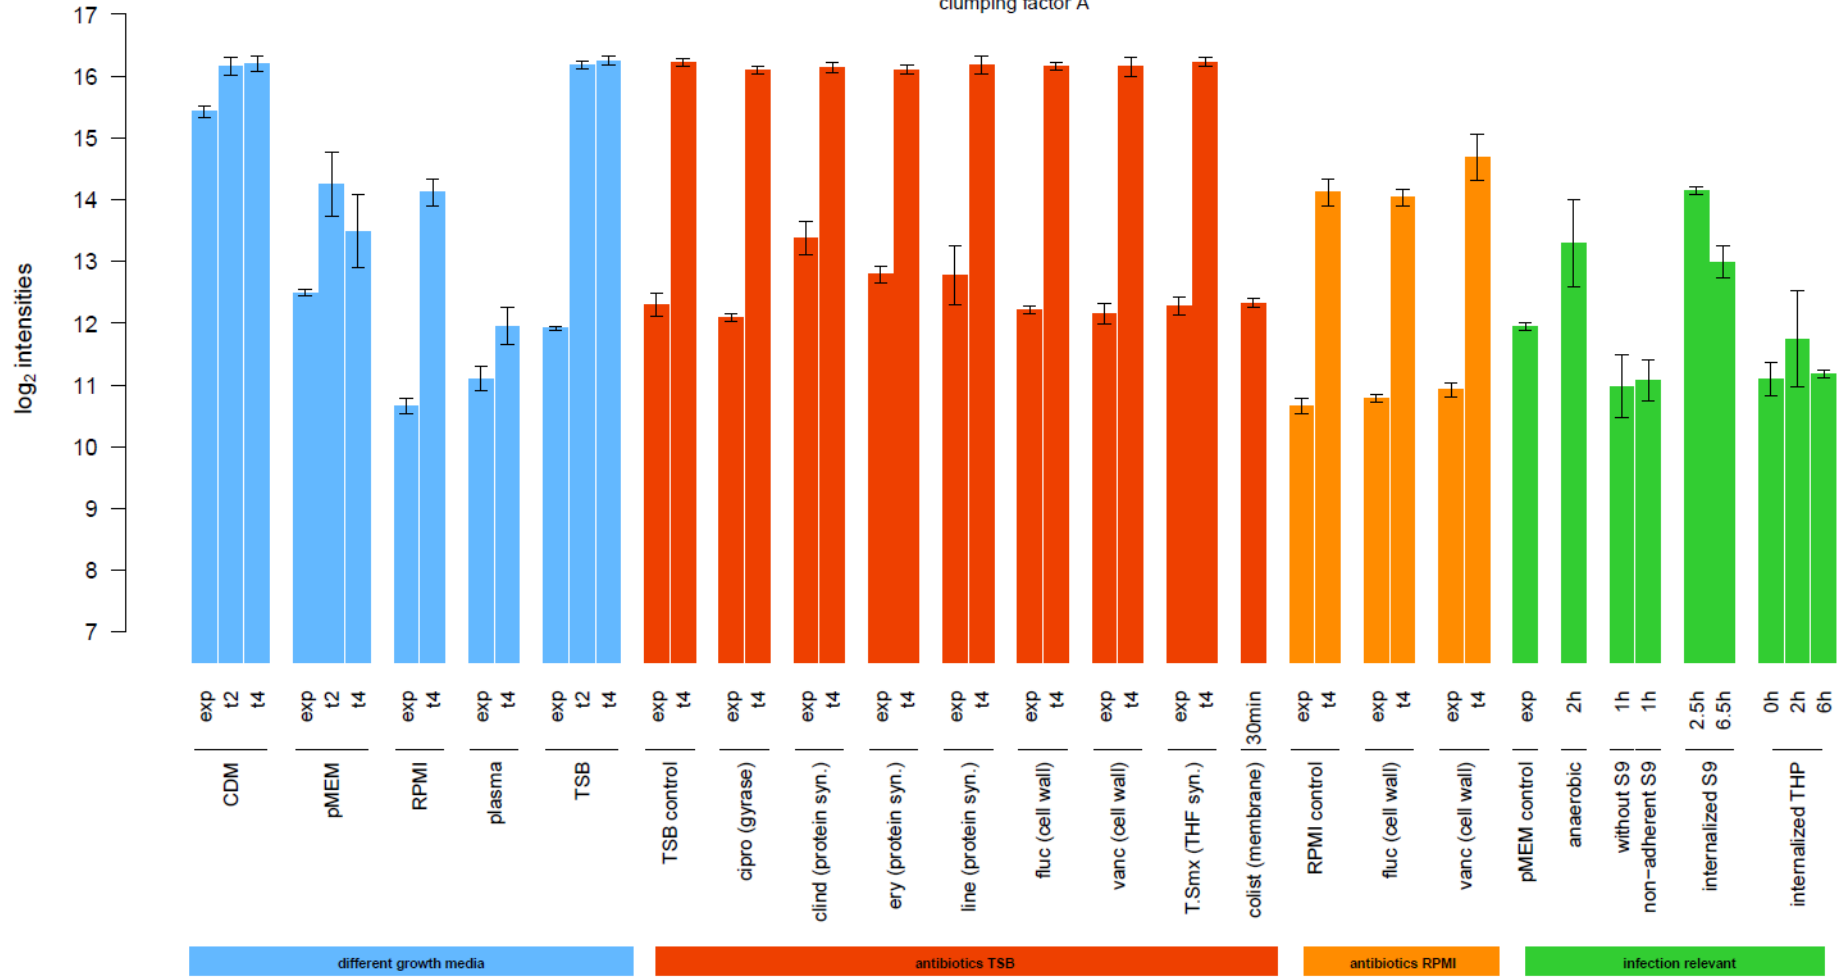

# SAOUHSC\_02963 - clfB

fibrinogen and binding surface anchored protein

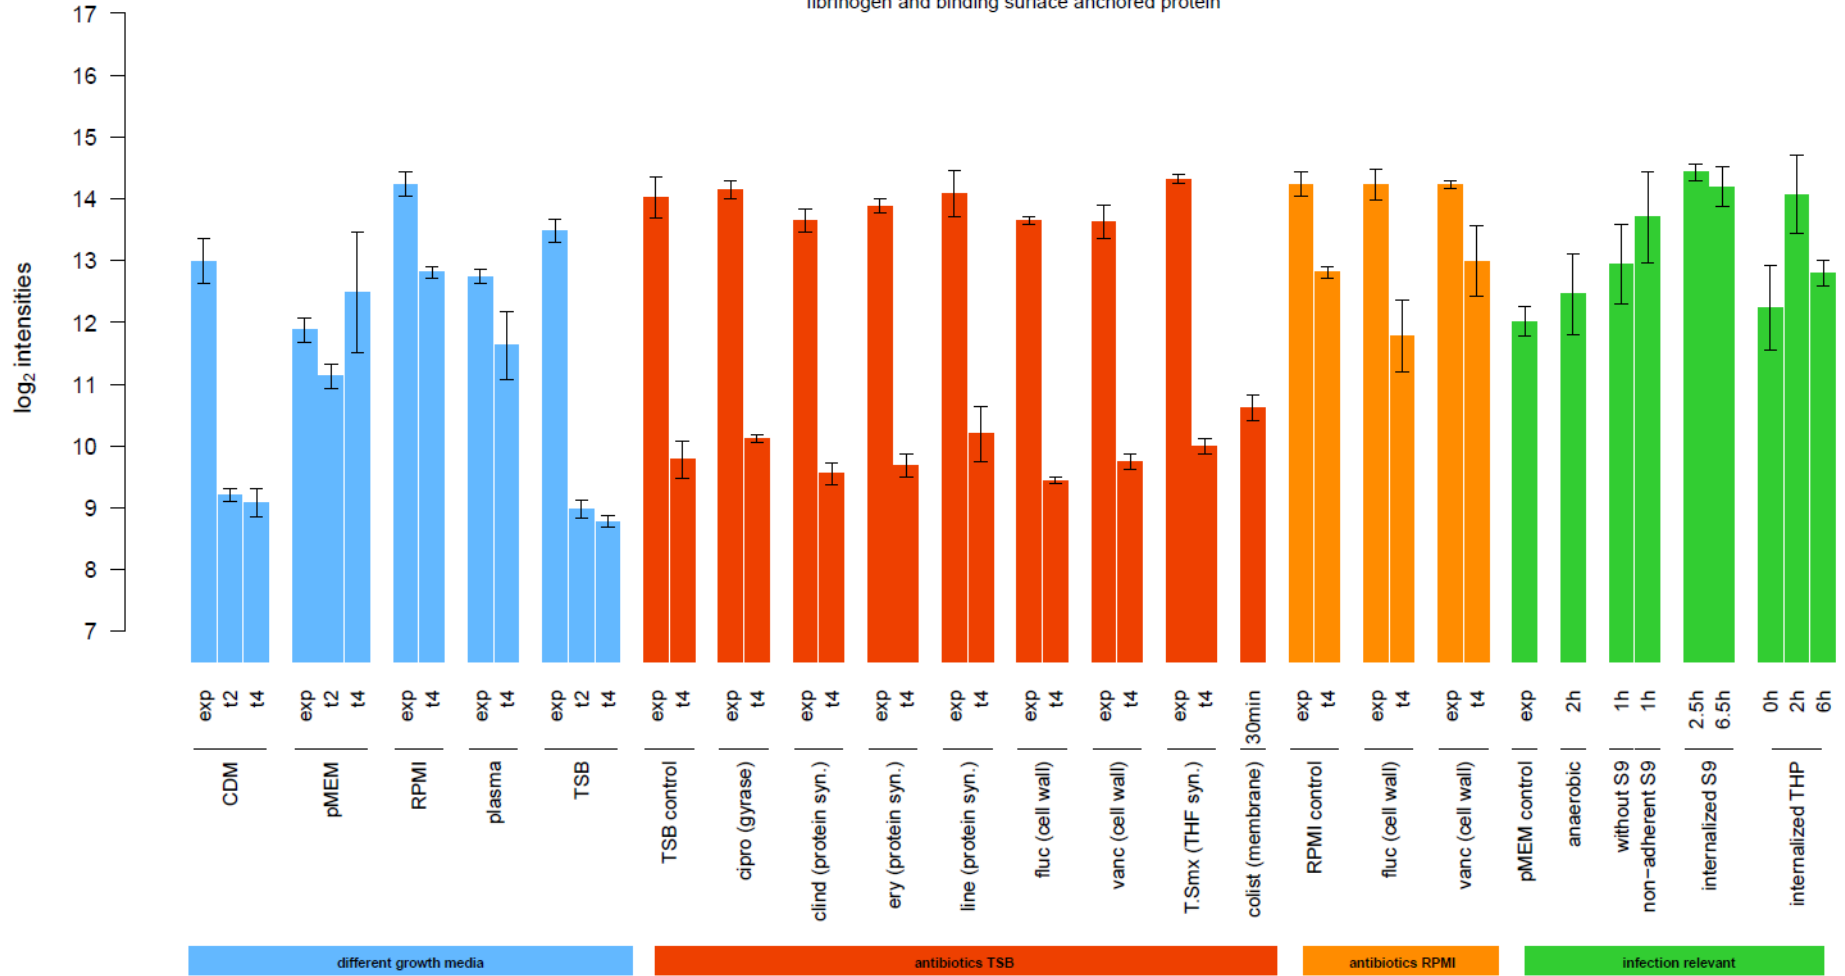

# SAOUHSC\_00069 - spa

immunoglobulin G binding protein A precursor

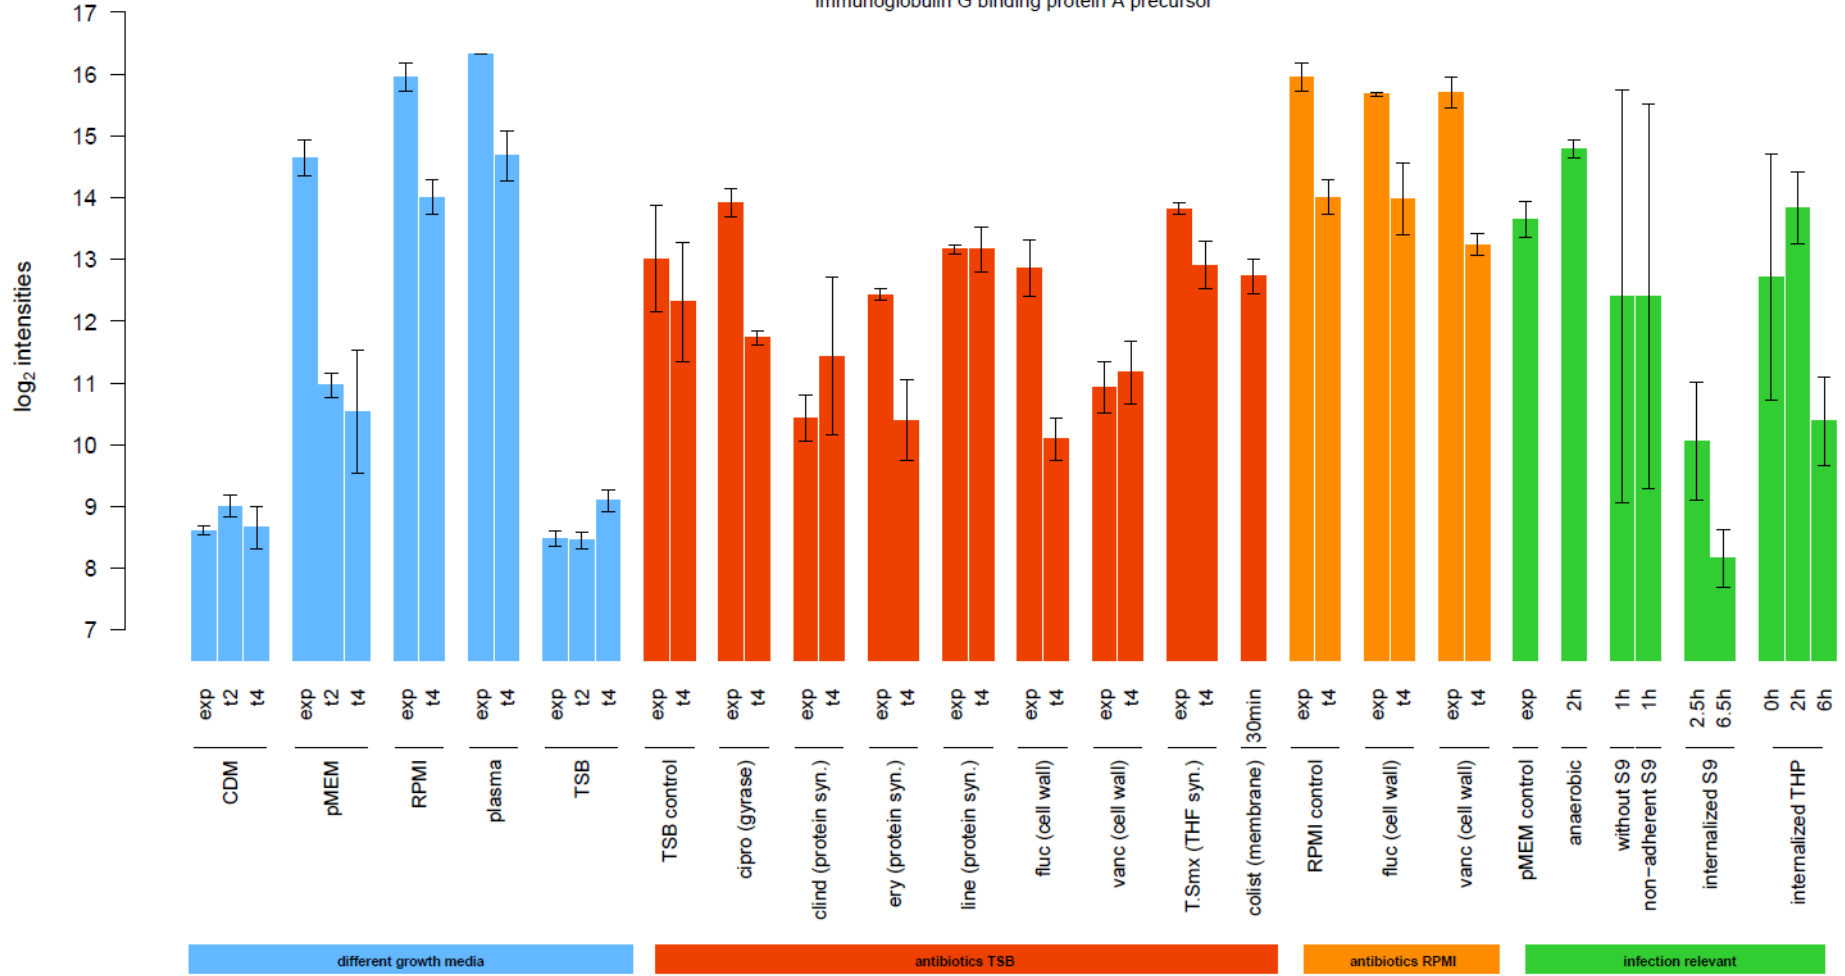

**SAOUHSC\_02972 - isaB**  
immunodominant staphylococcal antigen B

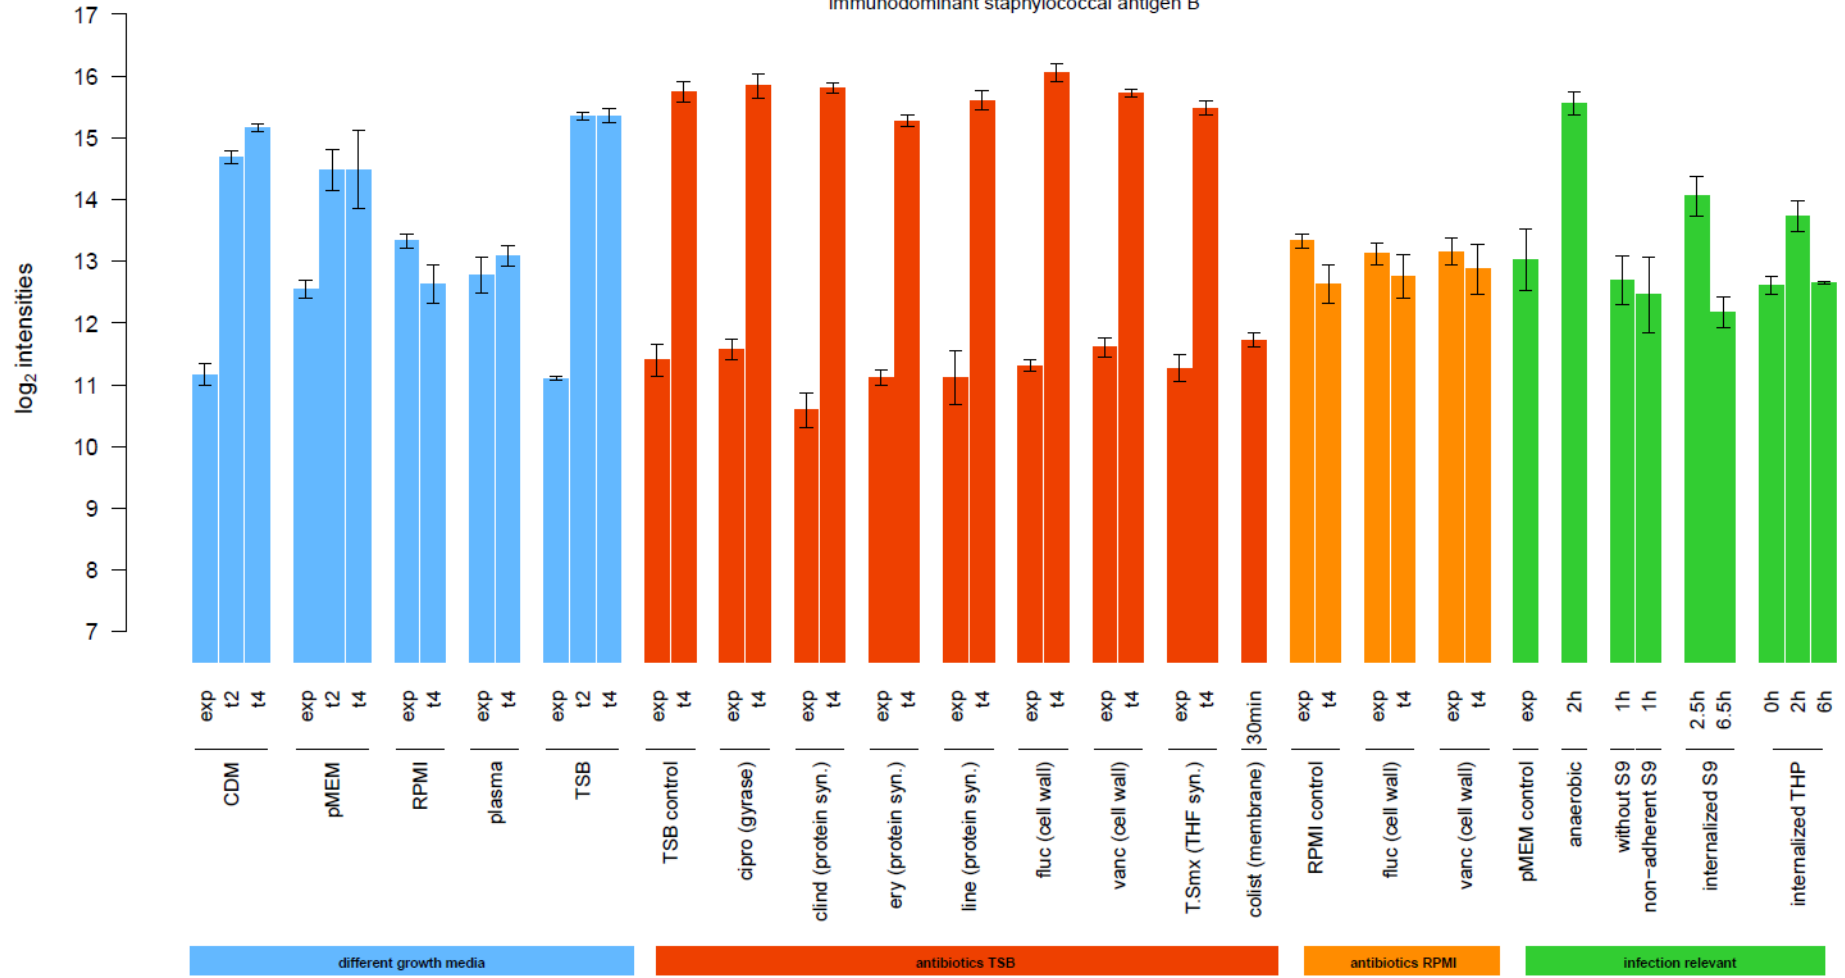

# SAOUHSC\_01081 - isdA

cell surface protein

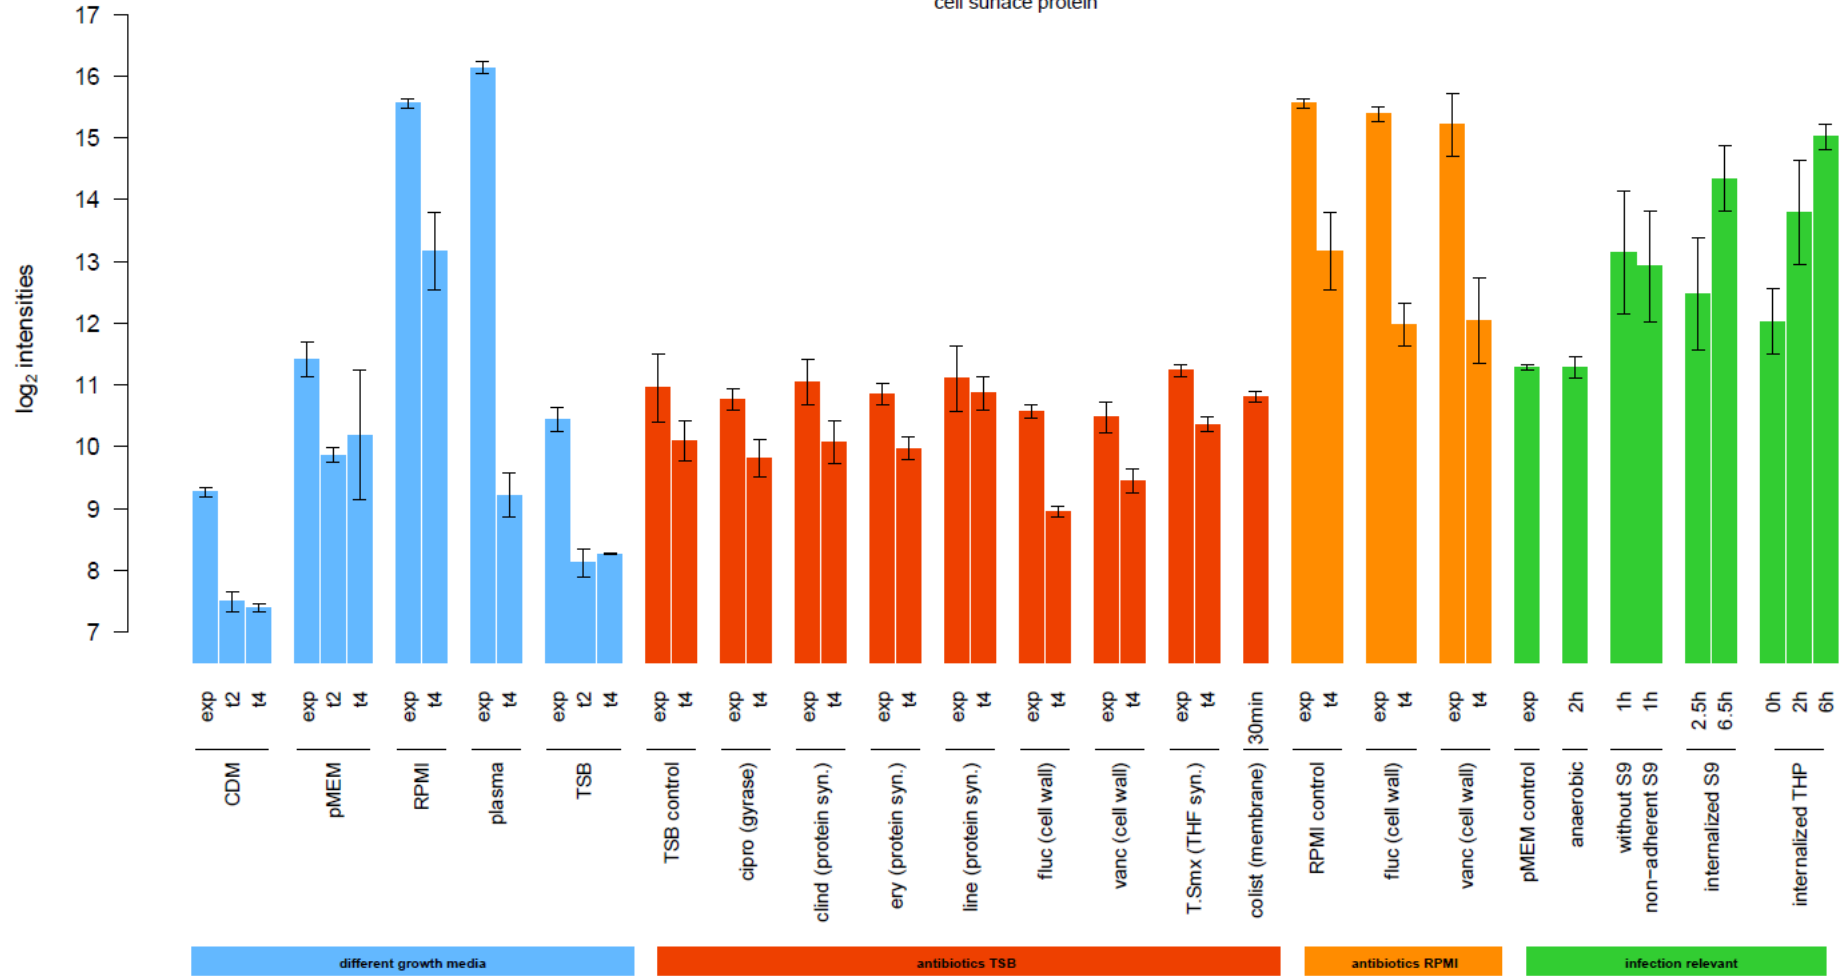



SAOUHSC\_02798 - sasG  
accumulation-associated protein

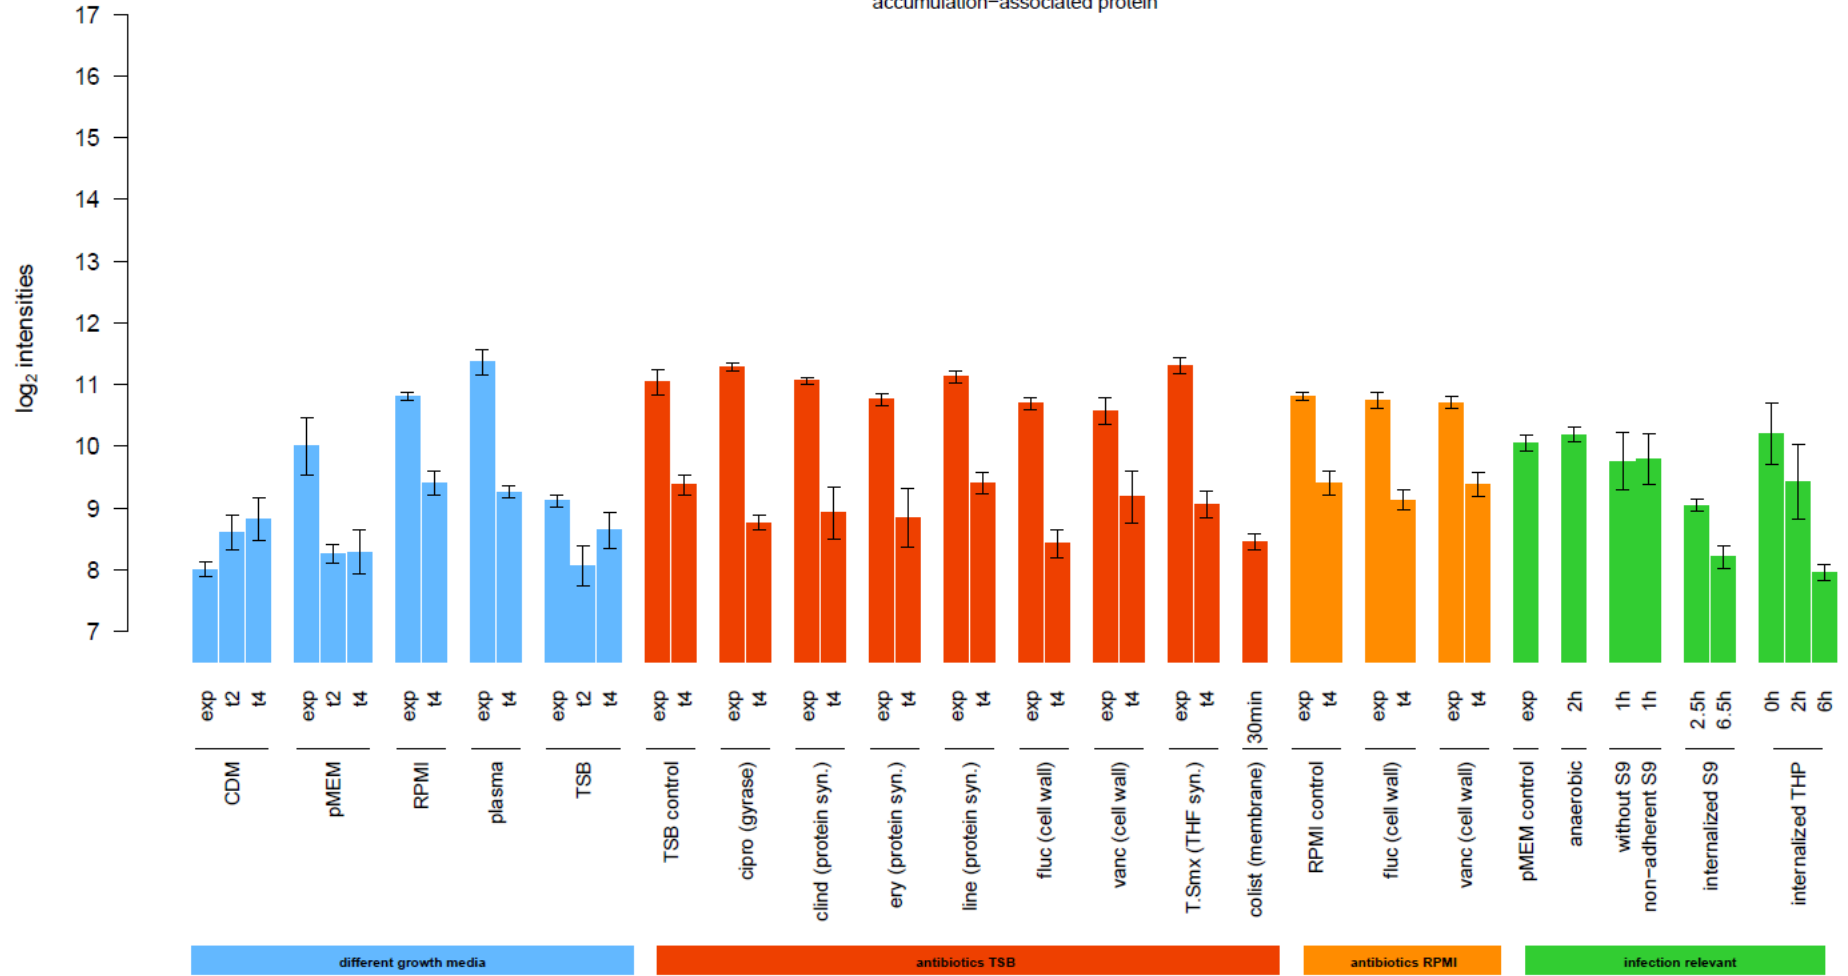

# SAOUHSC\_00544 - sdrC

serine-aspartate repeat-containing protein D

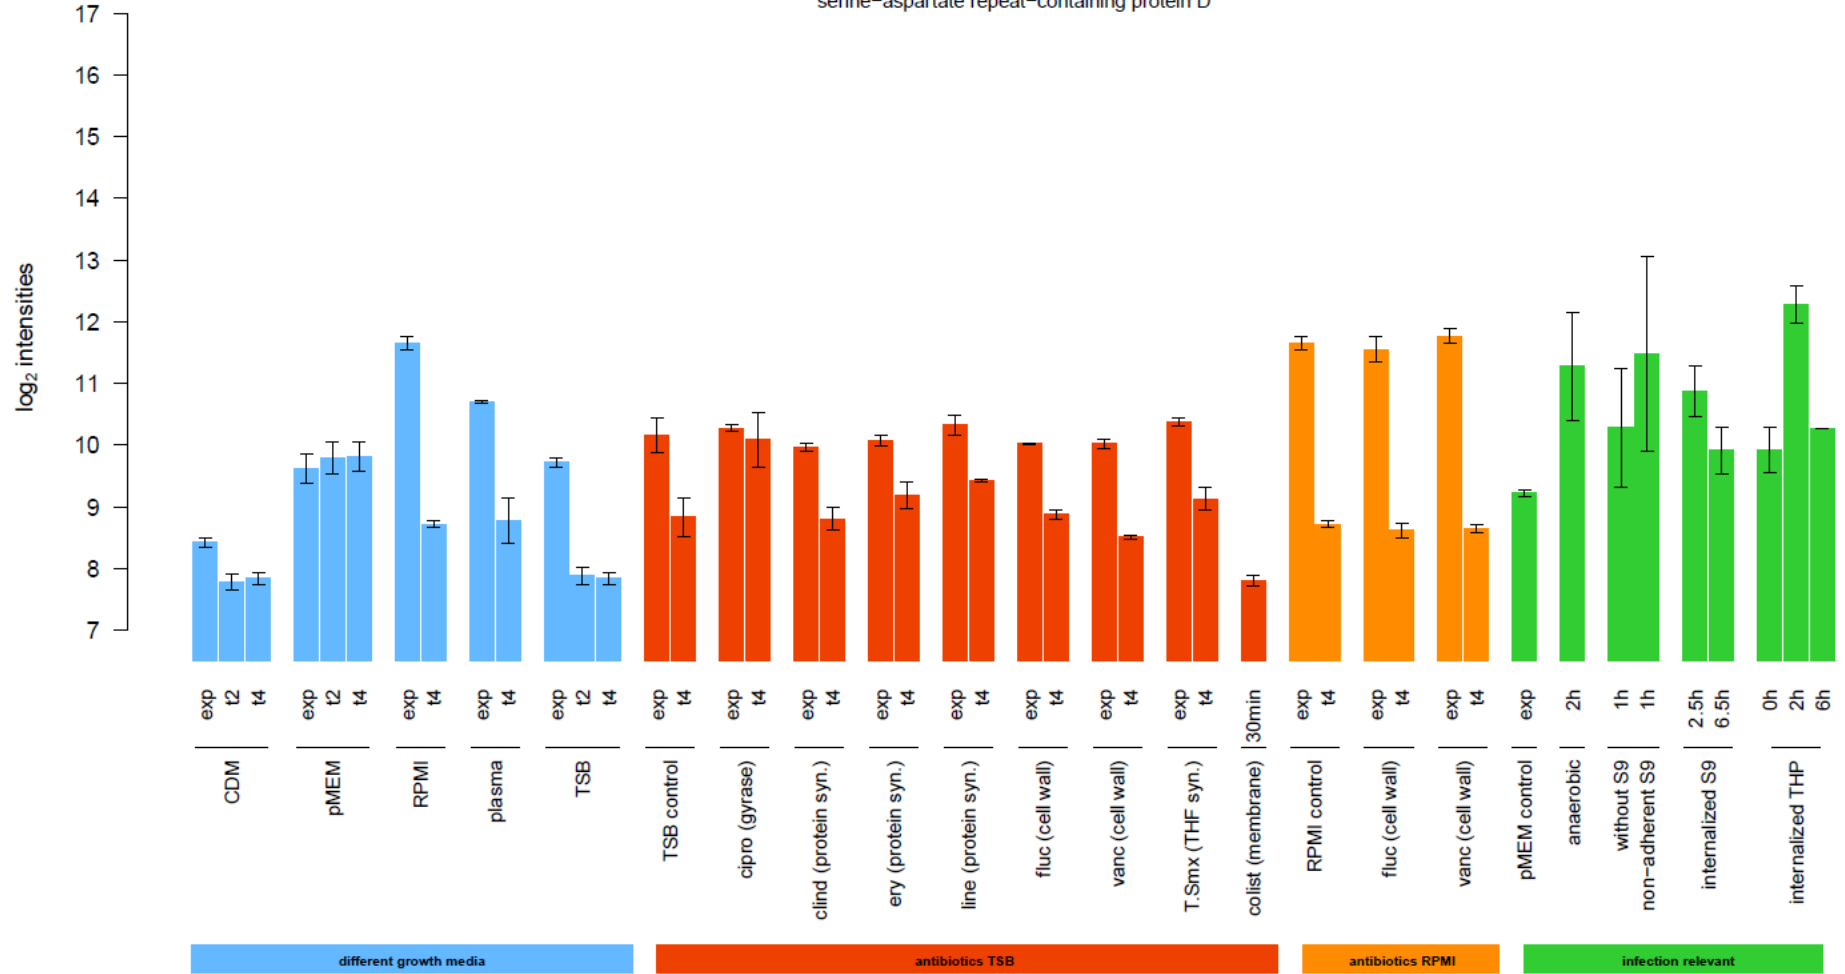

# SAOUHSC\_00545 - sdrD

serine-aspartate repeat-containing protein D

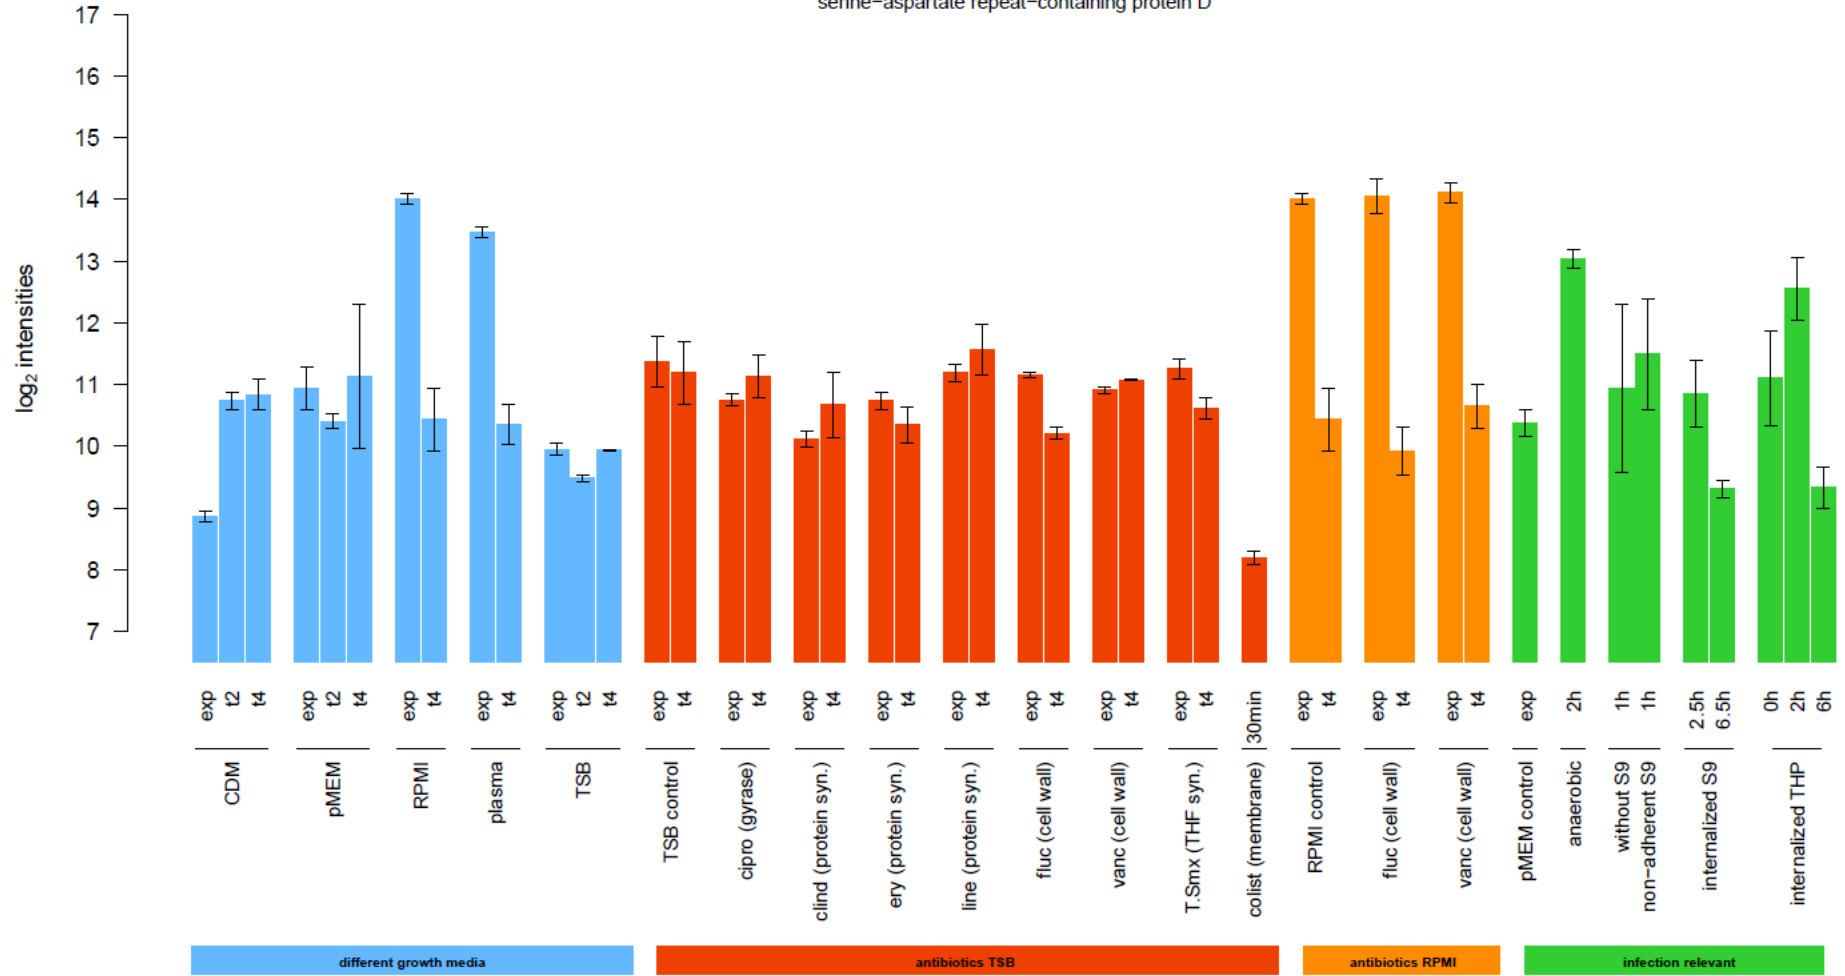

# SAOUHSC\_01501 - ebpS

elastin-binding protein

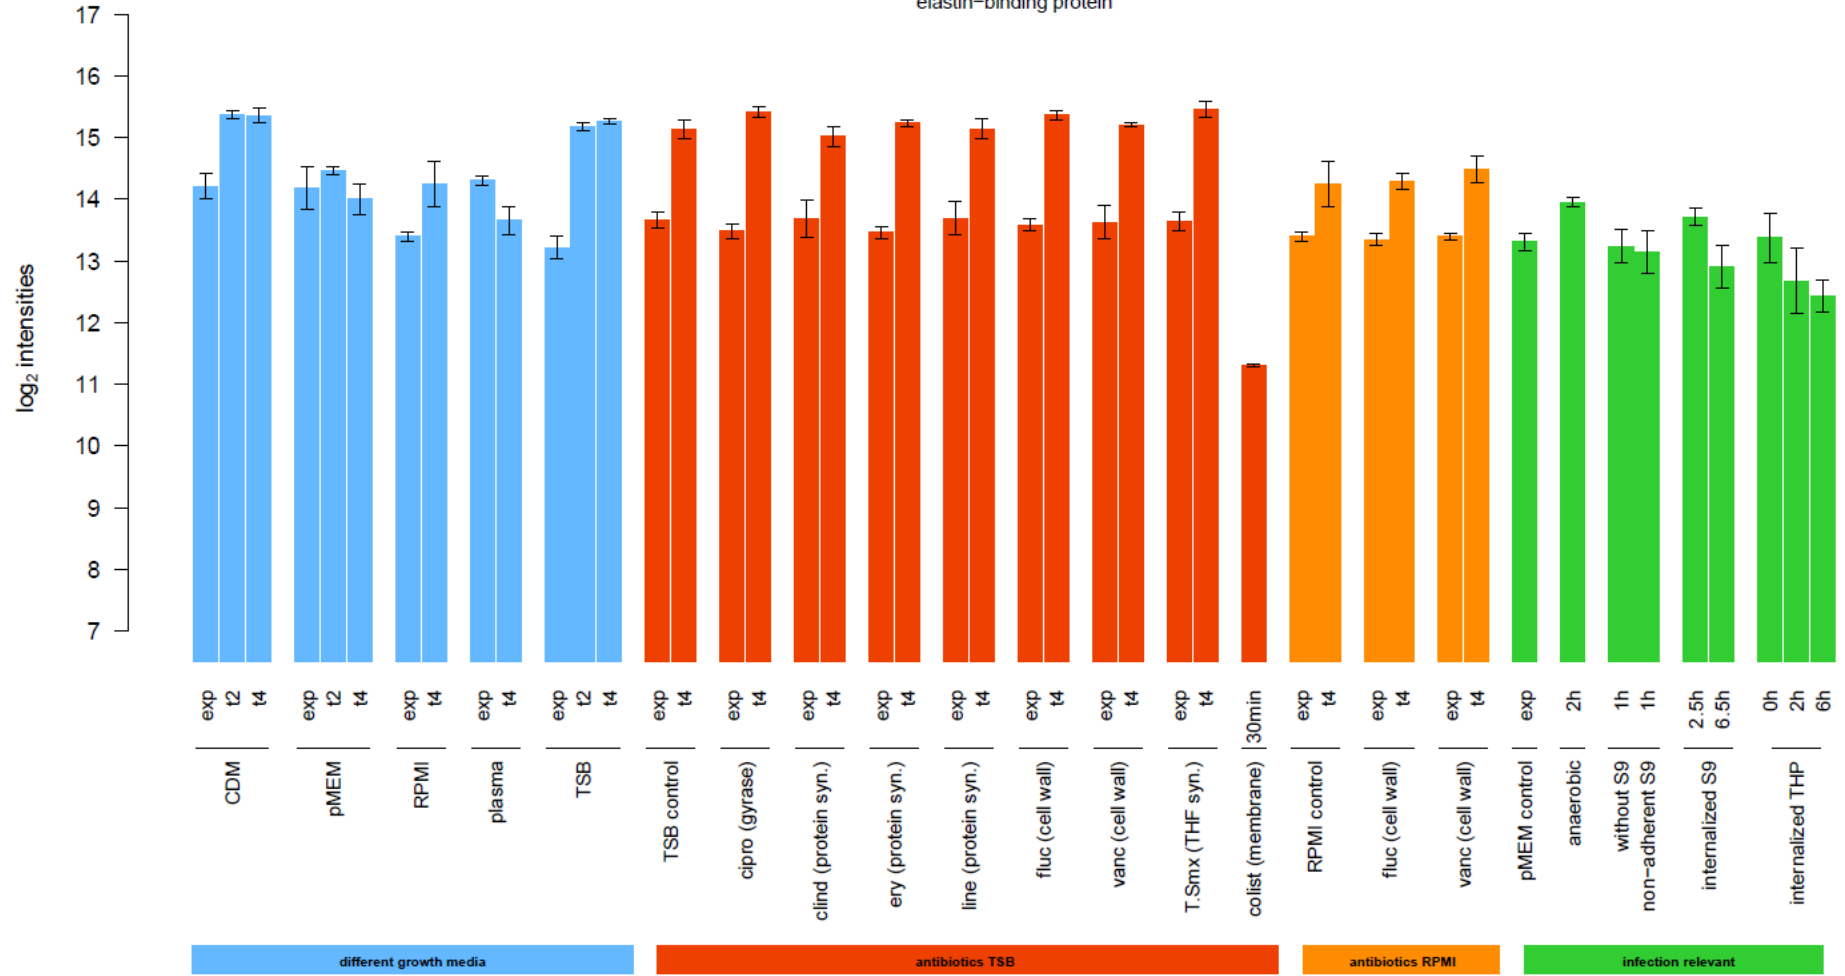

# SAOUHSC\_02161 - eap / map

secreted protein containing MAP domains

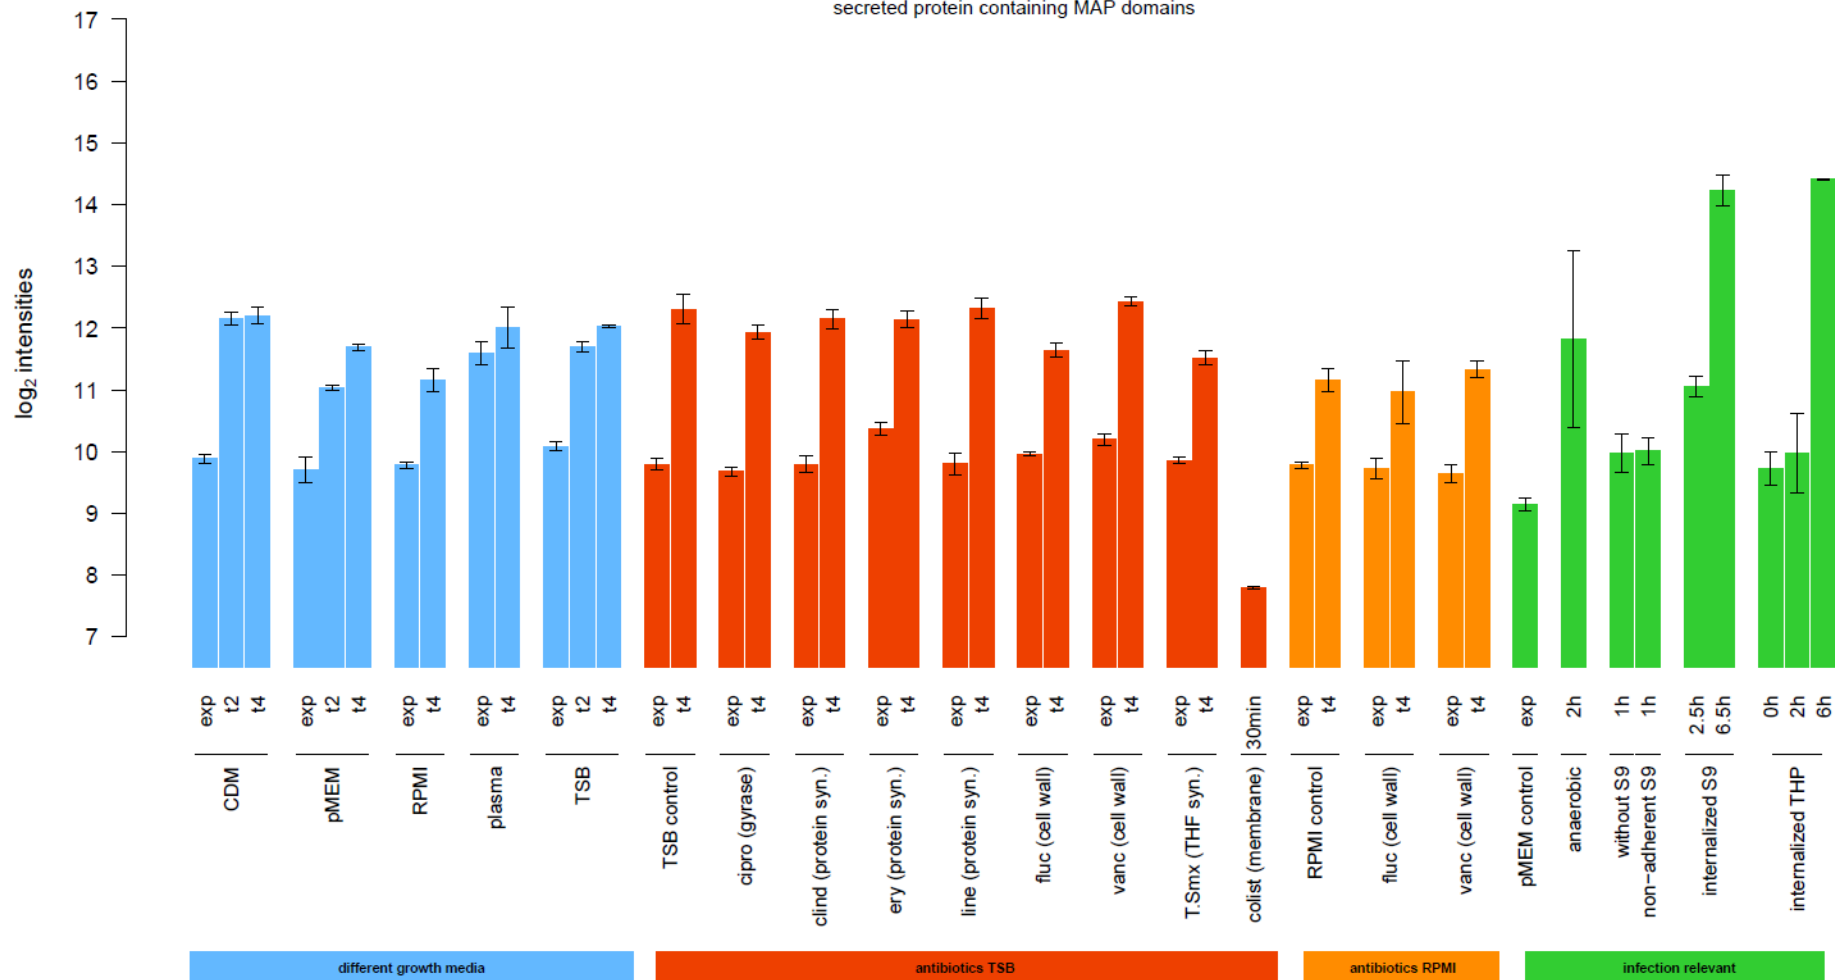

SAOUHSC\_00816 - ssp / emp  
extracellular matrix and plasma binding protein precursor

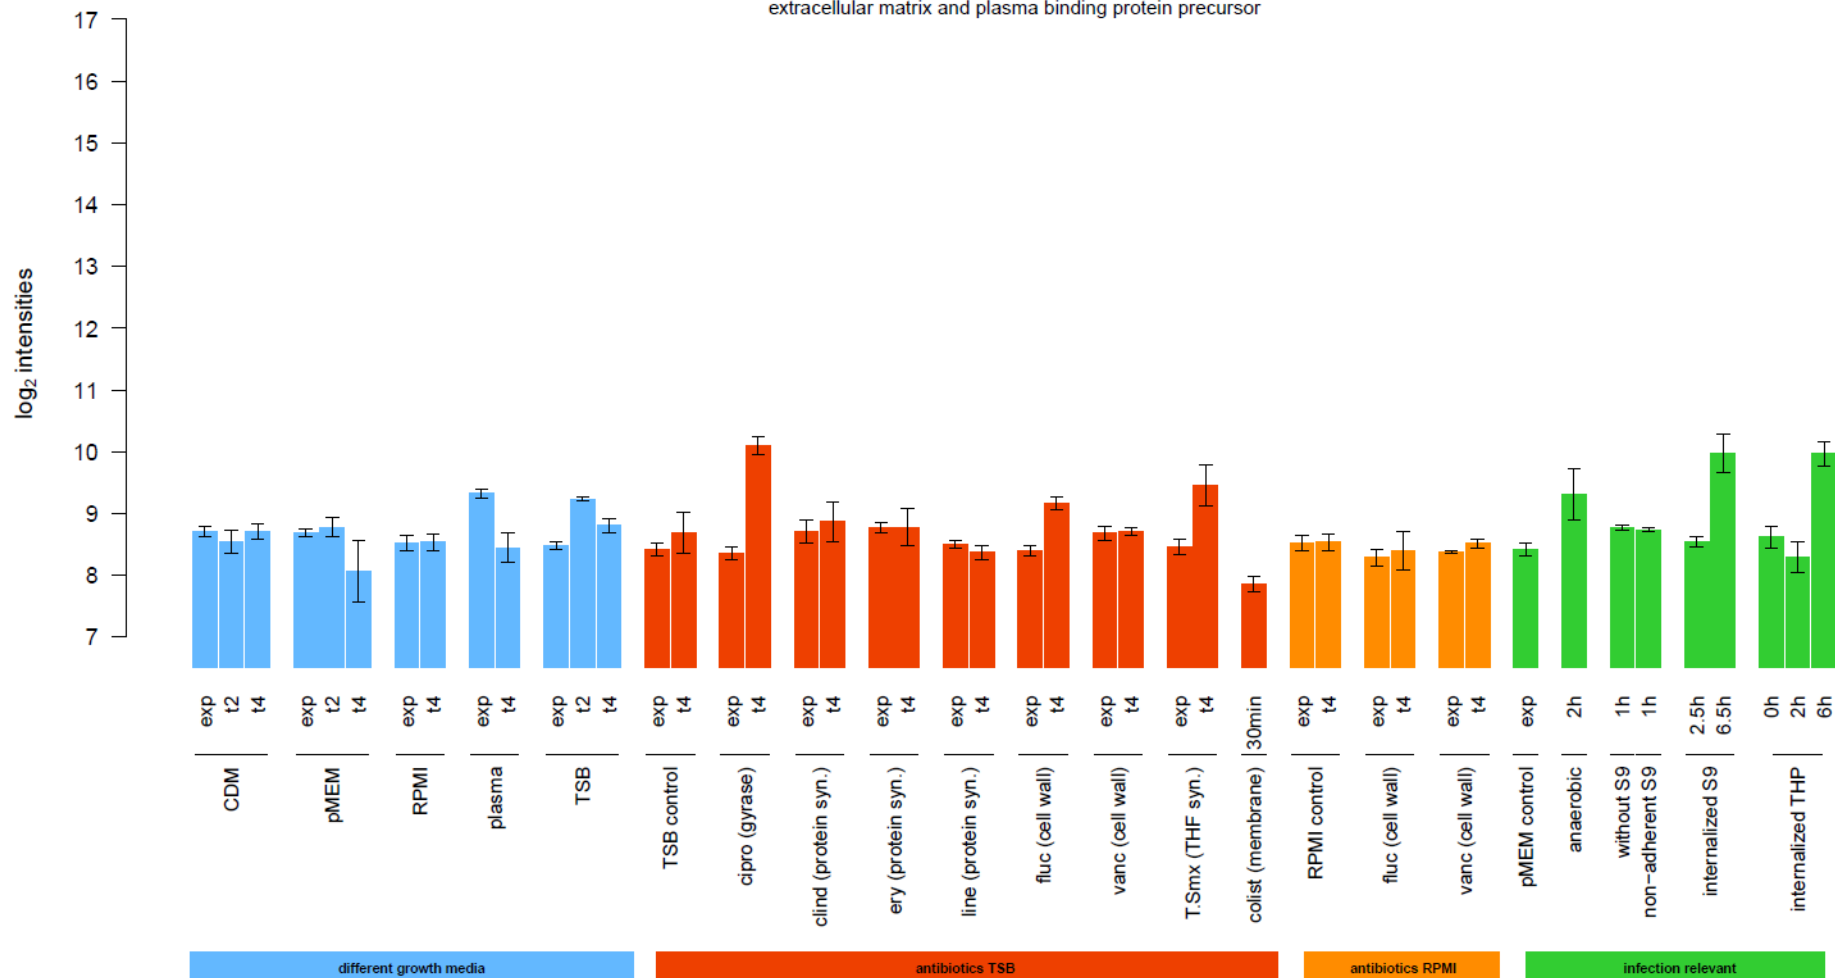

# SAOUHSC\_01114 - fib / efb

fibrinogen-binding protein

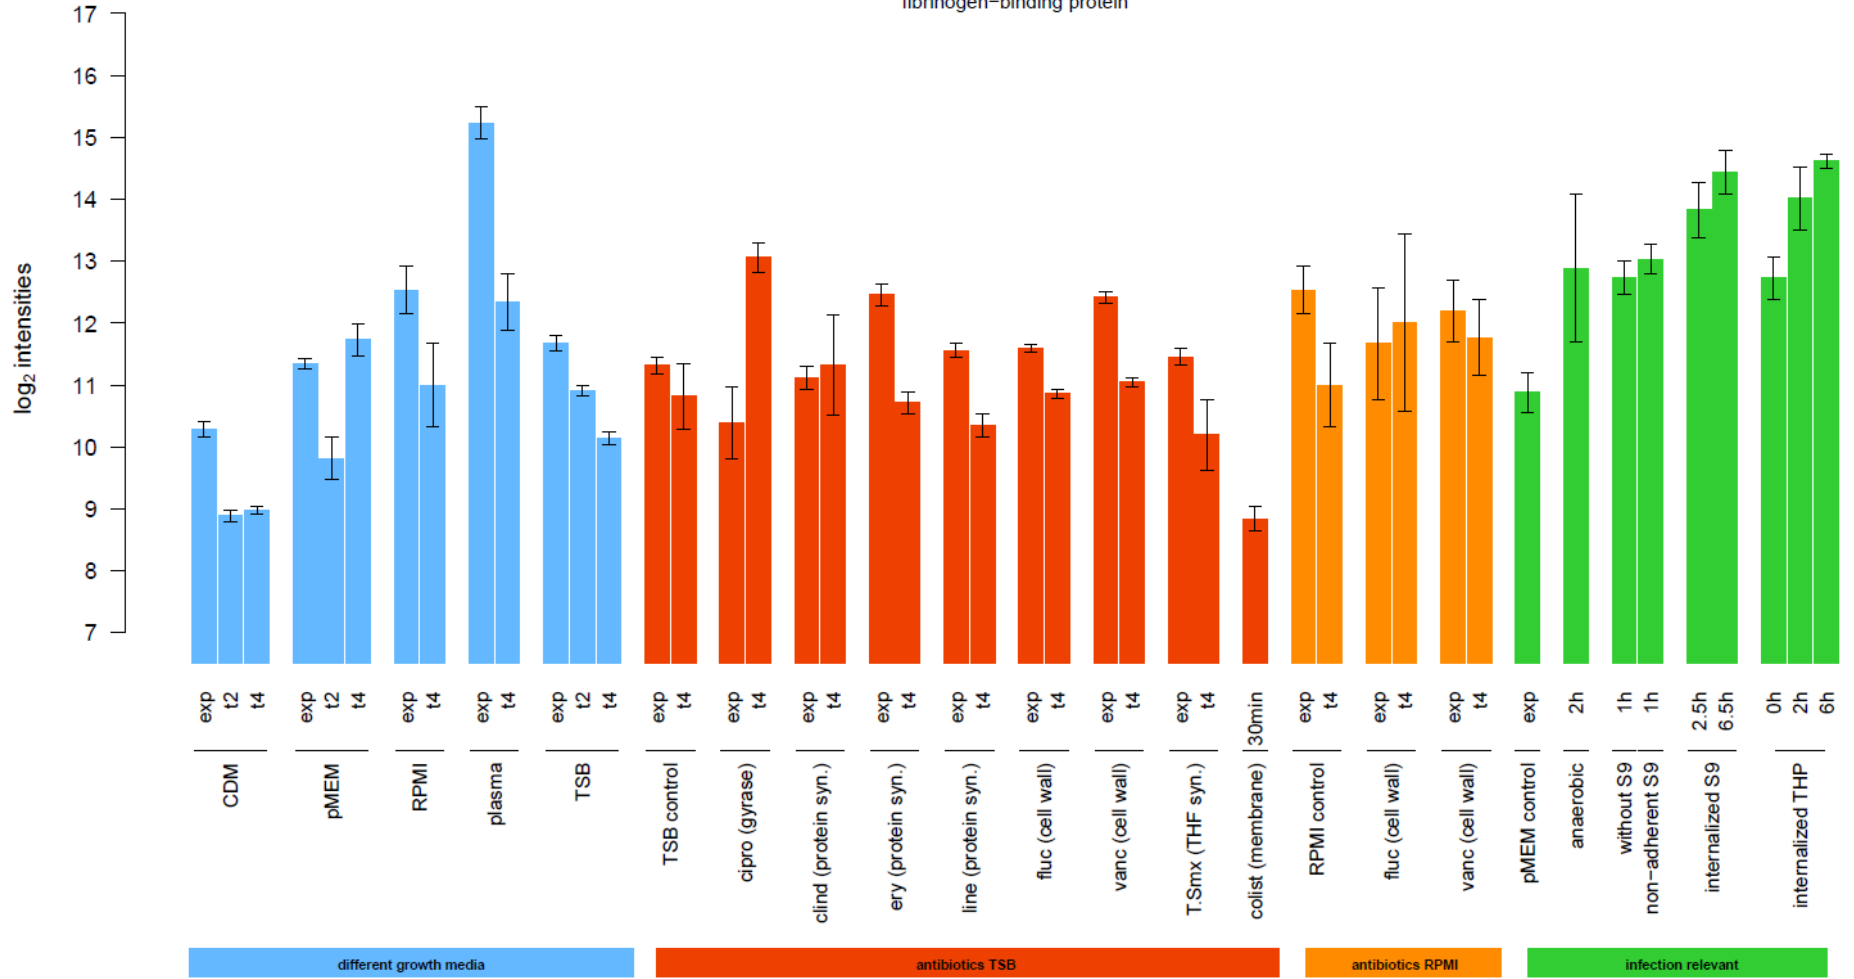

SAOUHSC\_00192 - coa  
staphylocoagulase precursor

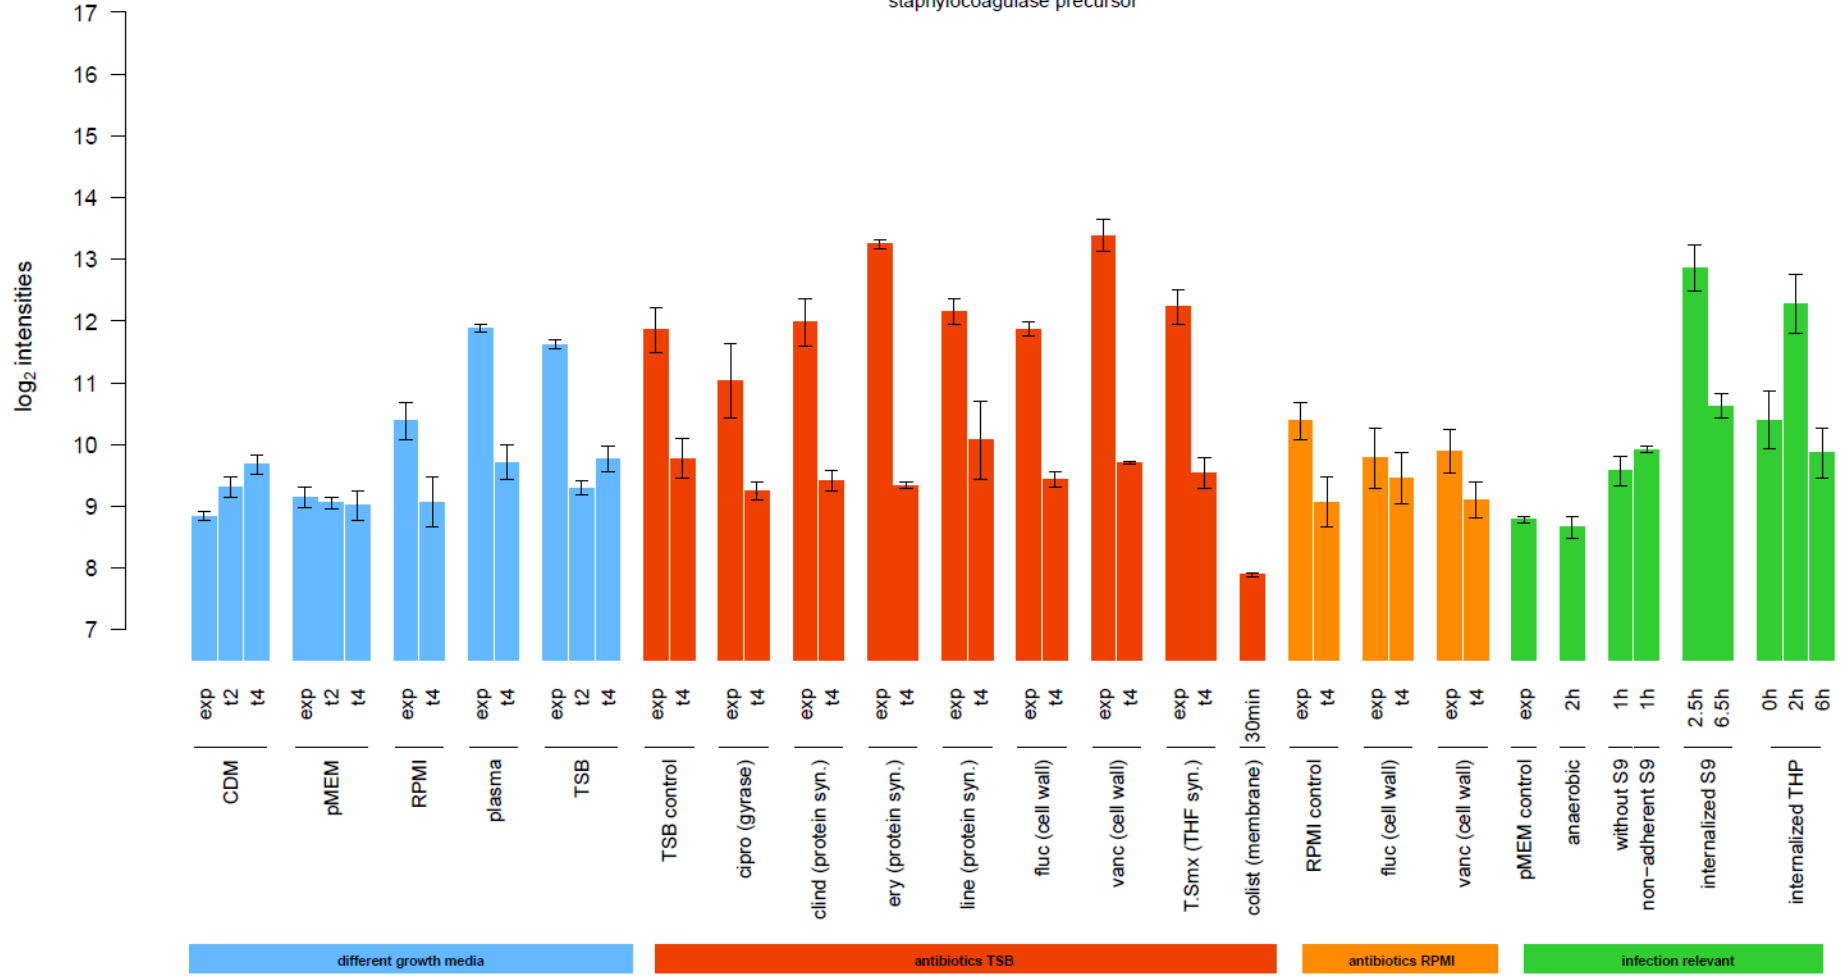



# SAOUHSC\_00814 - SAOUHSC\_00814 / vwb

protein containing Staphylocoagulase-N domain

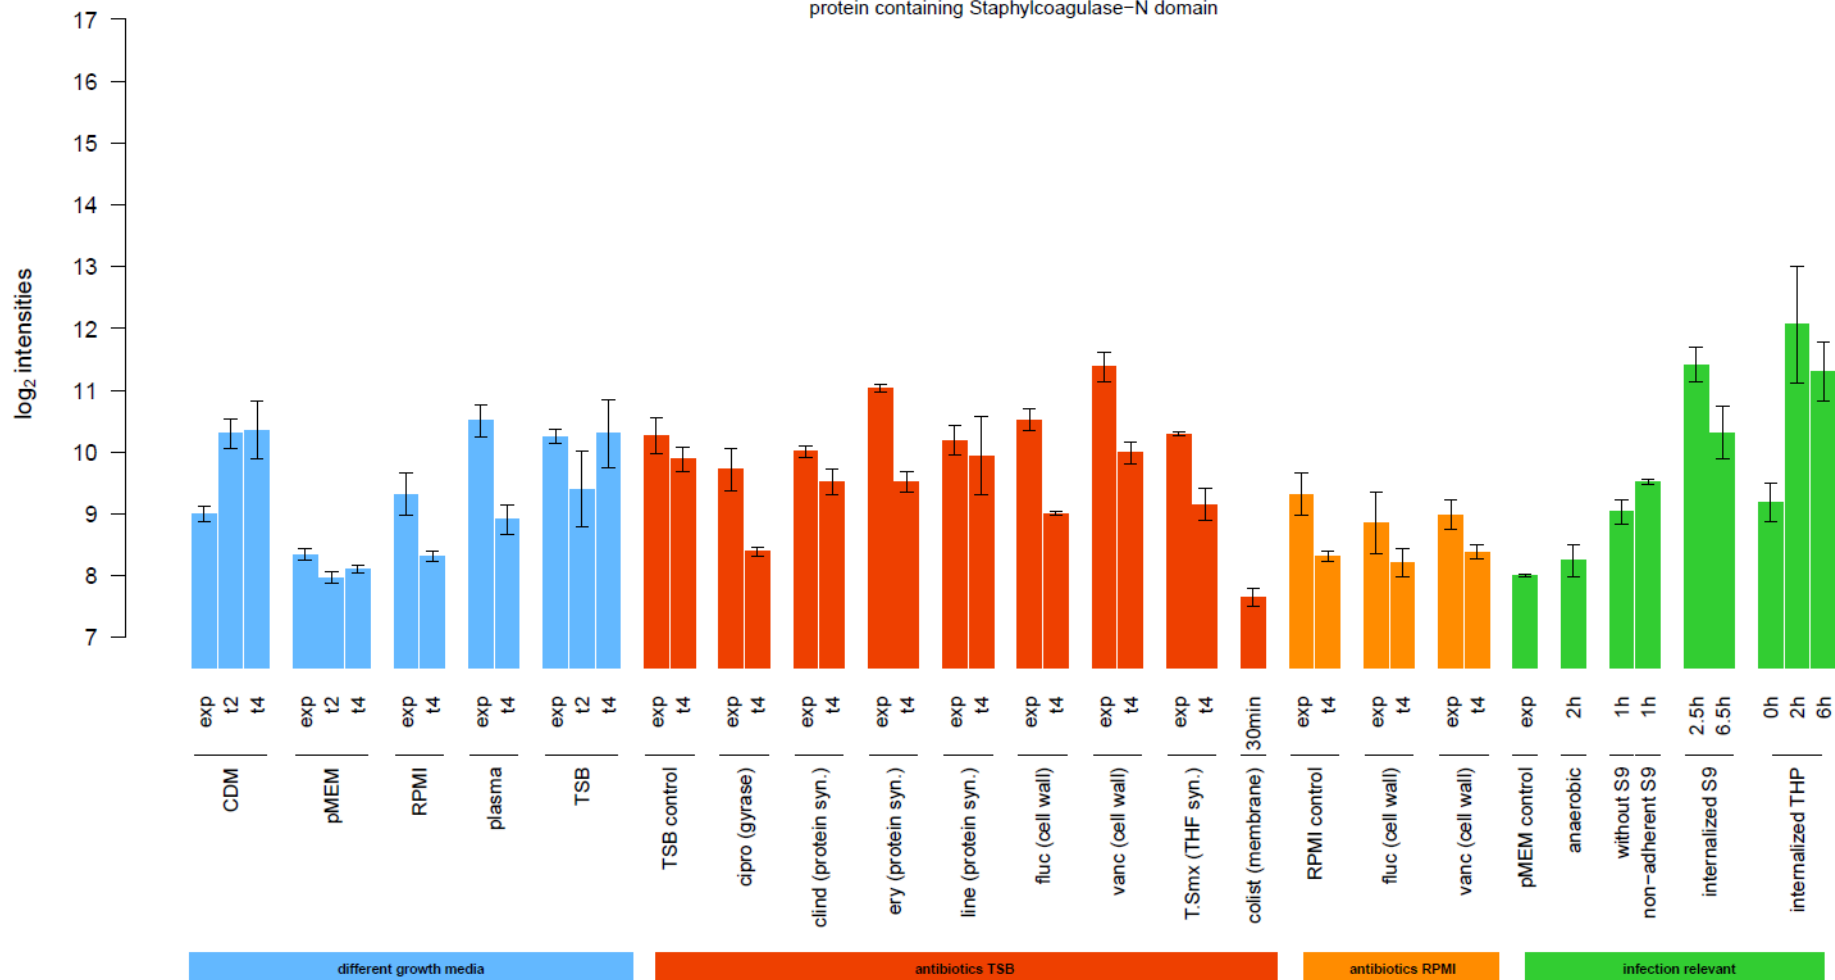

# SAOUHSC\_01447 - ebhB

cell surface protein

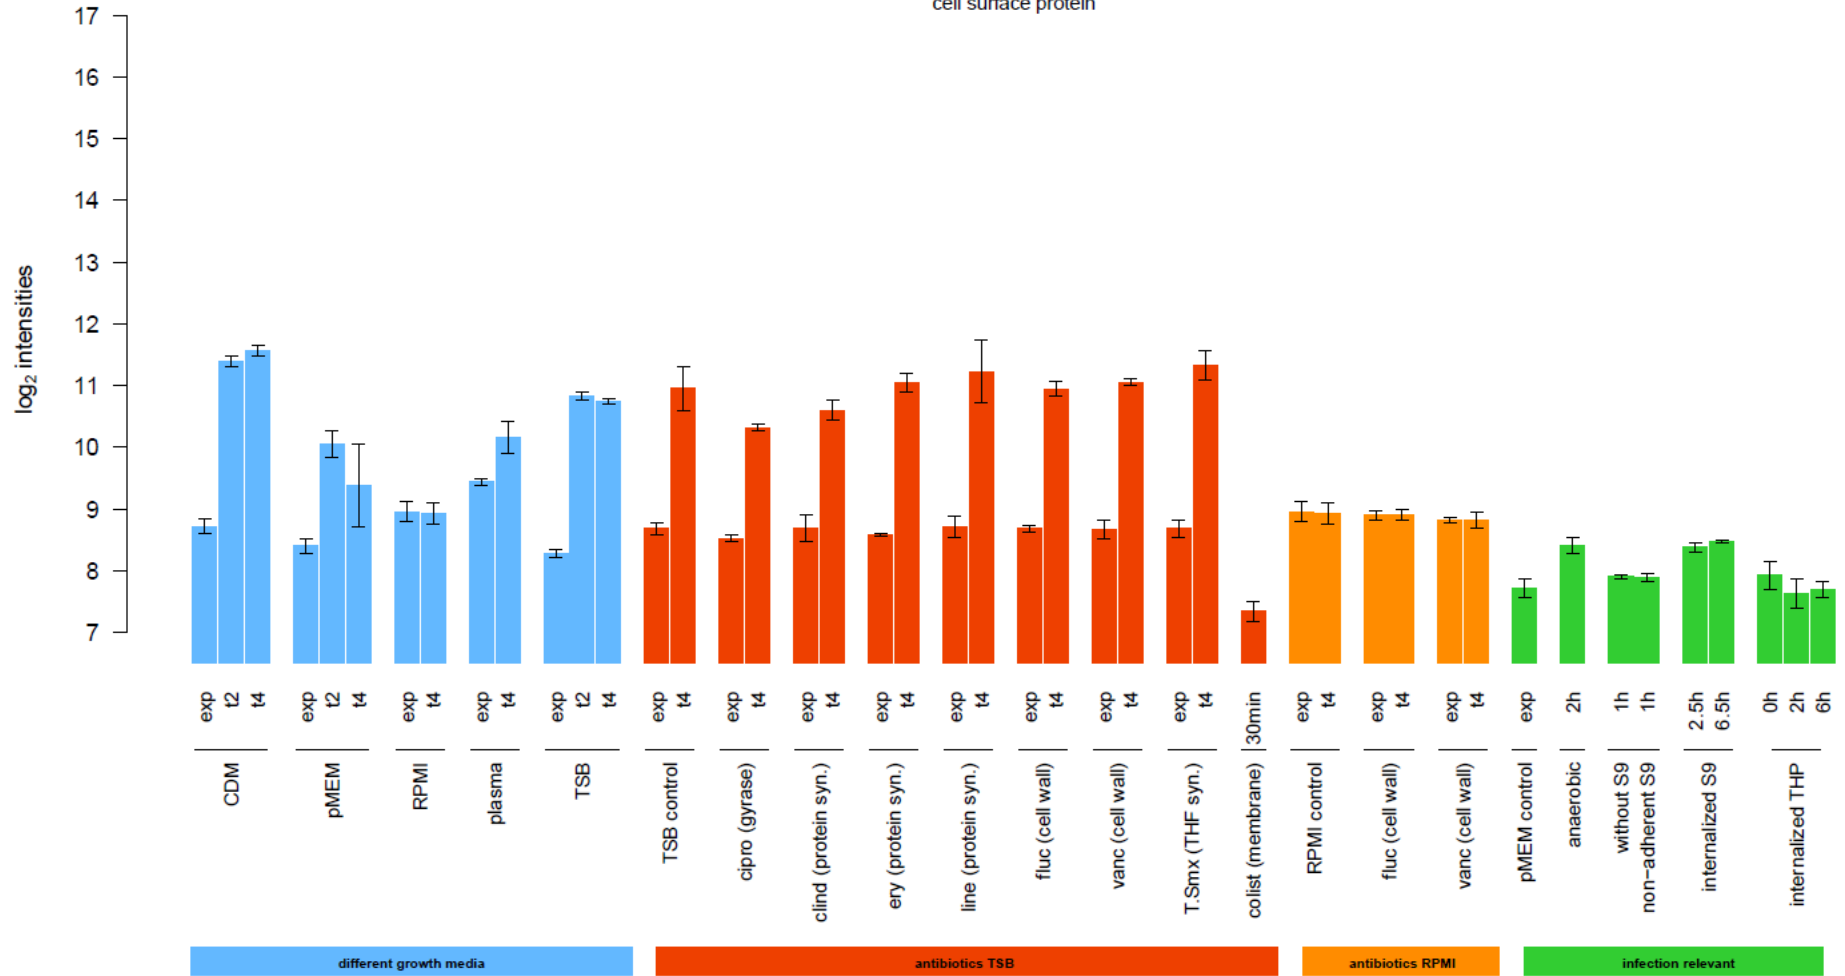

# SAOUHSC\_01121 - hIY / hIa

hemolysin II

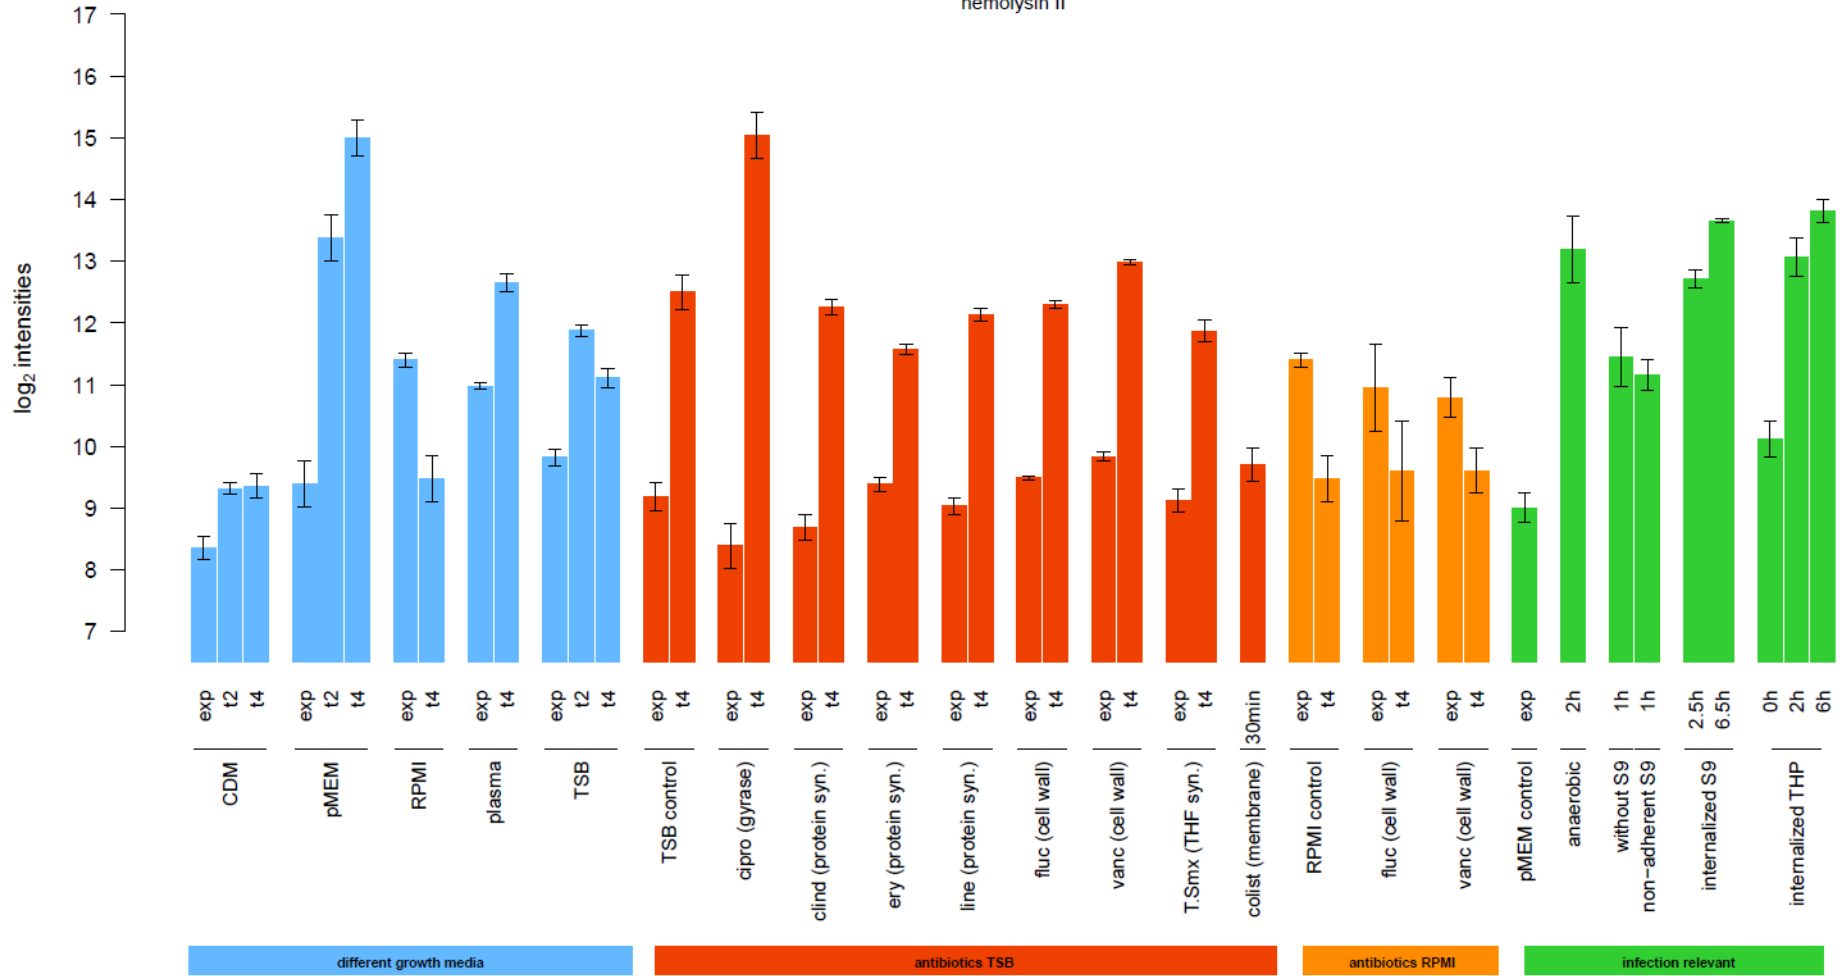

# SAOUHSC\_02163 - hIb2

[weak similarity to] truncated beta-hemolysin

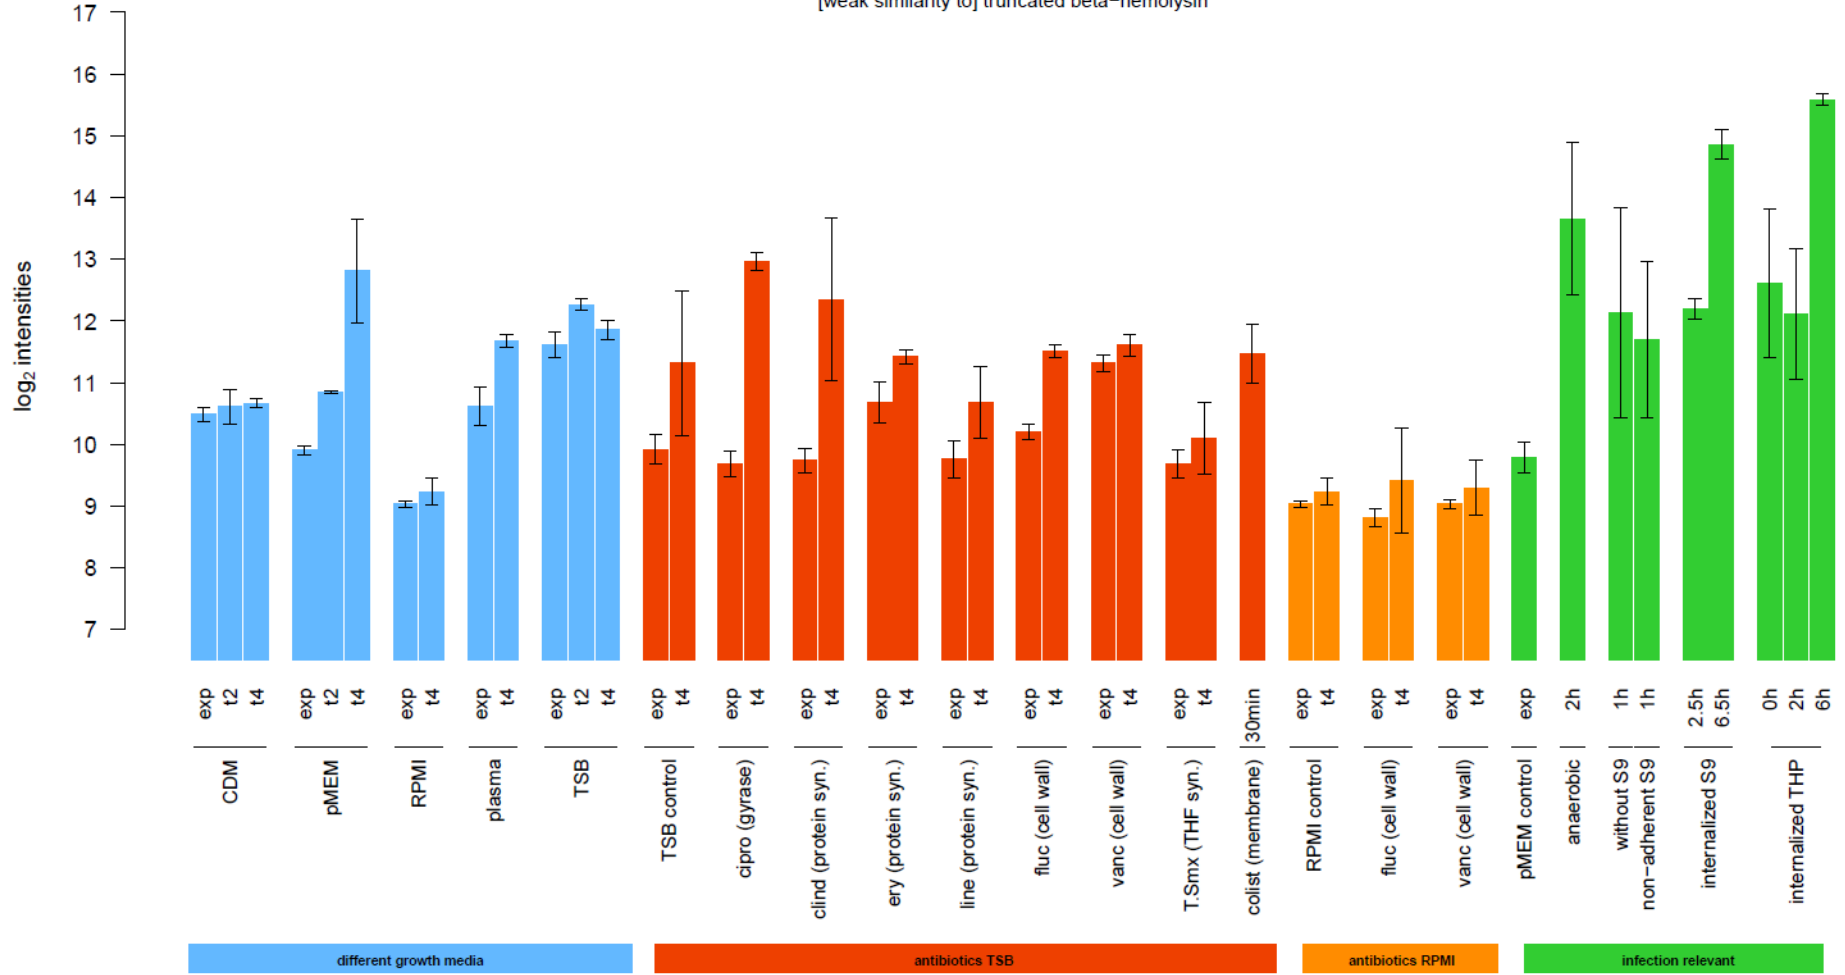

# SAOUHSC\_02708 - hlgA

leukotoxin S-subunit

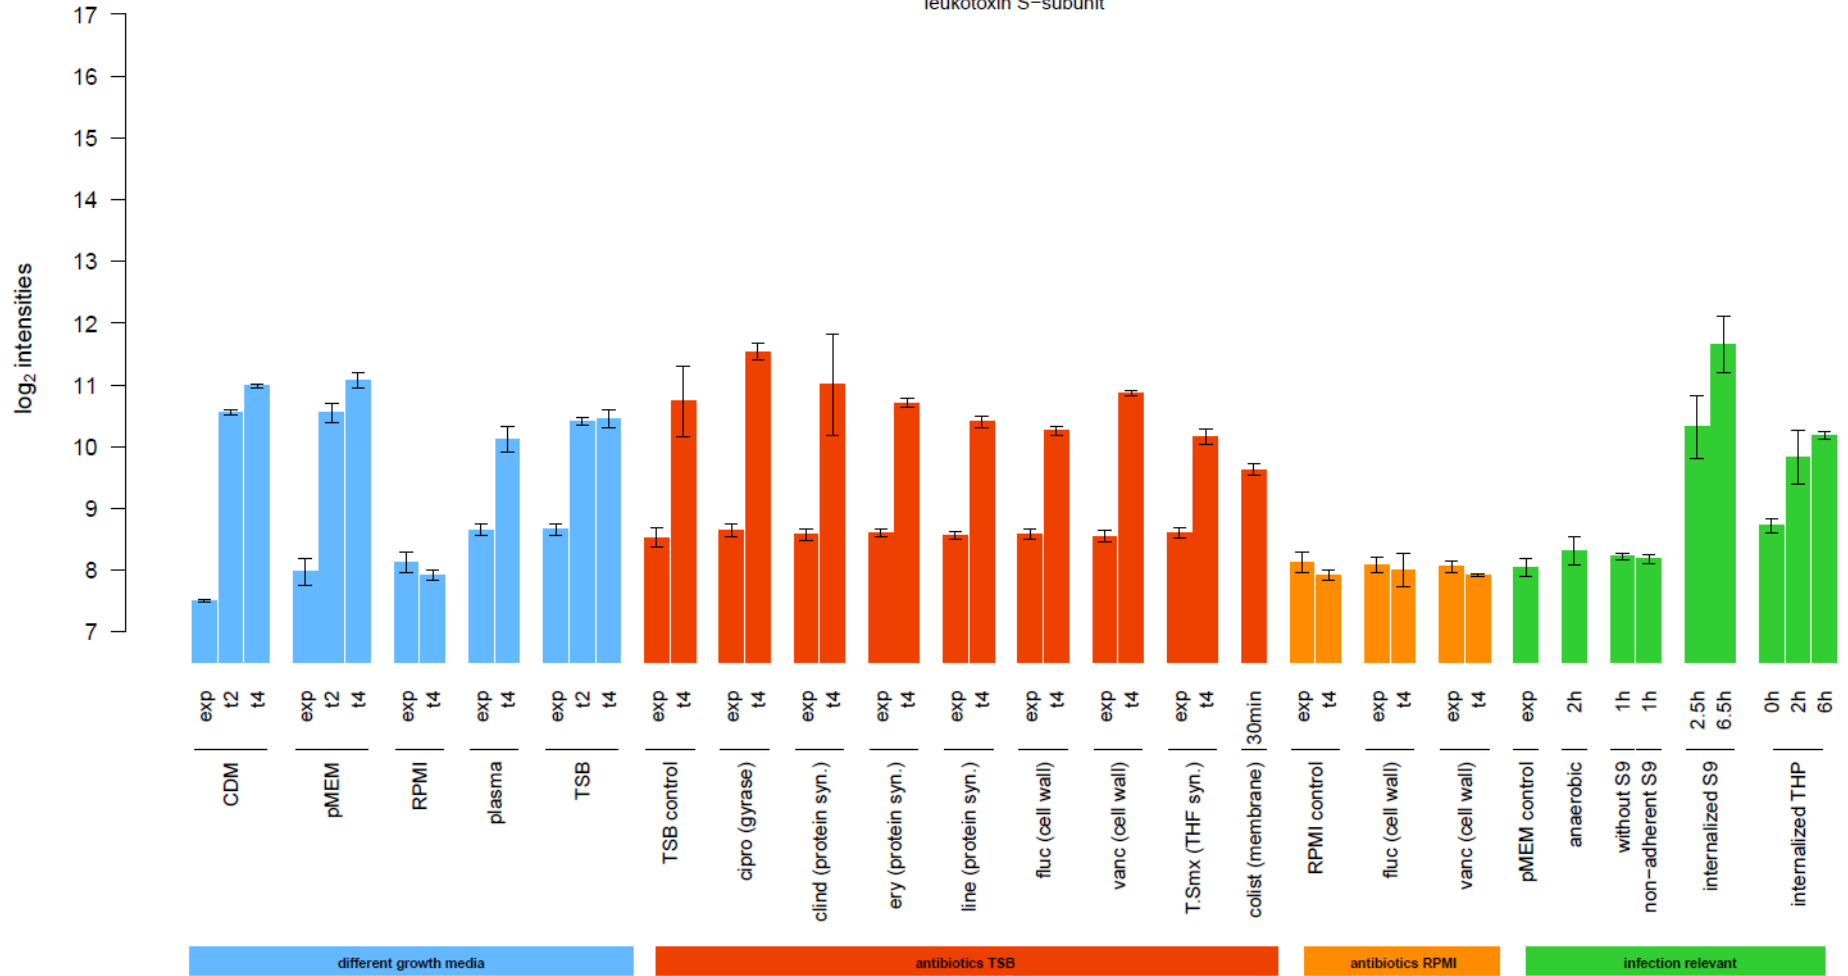

# SAOUHSC\_02710 - hlgB

leukotoxin D subunit

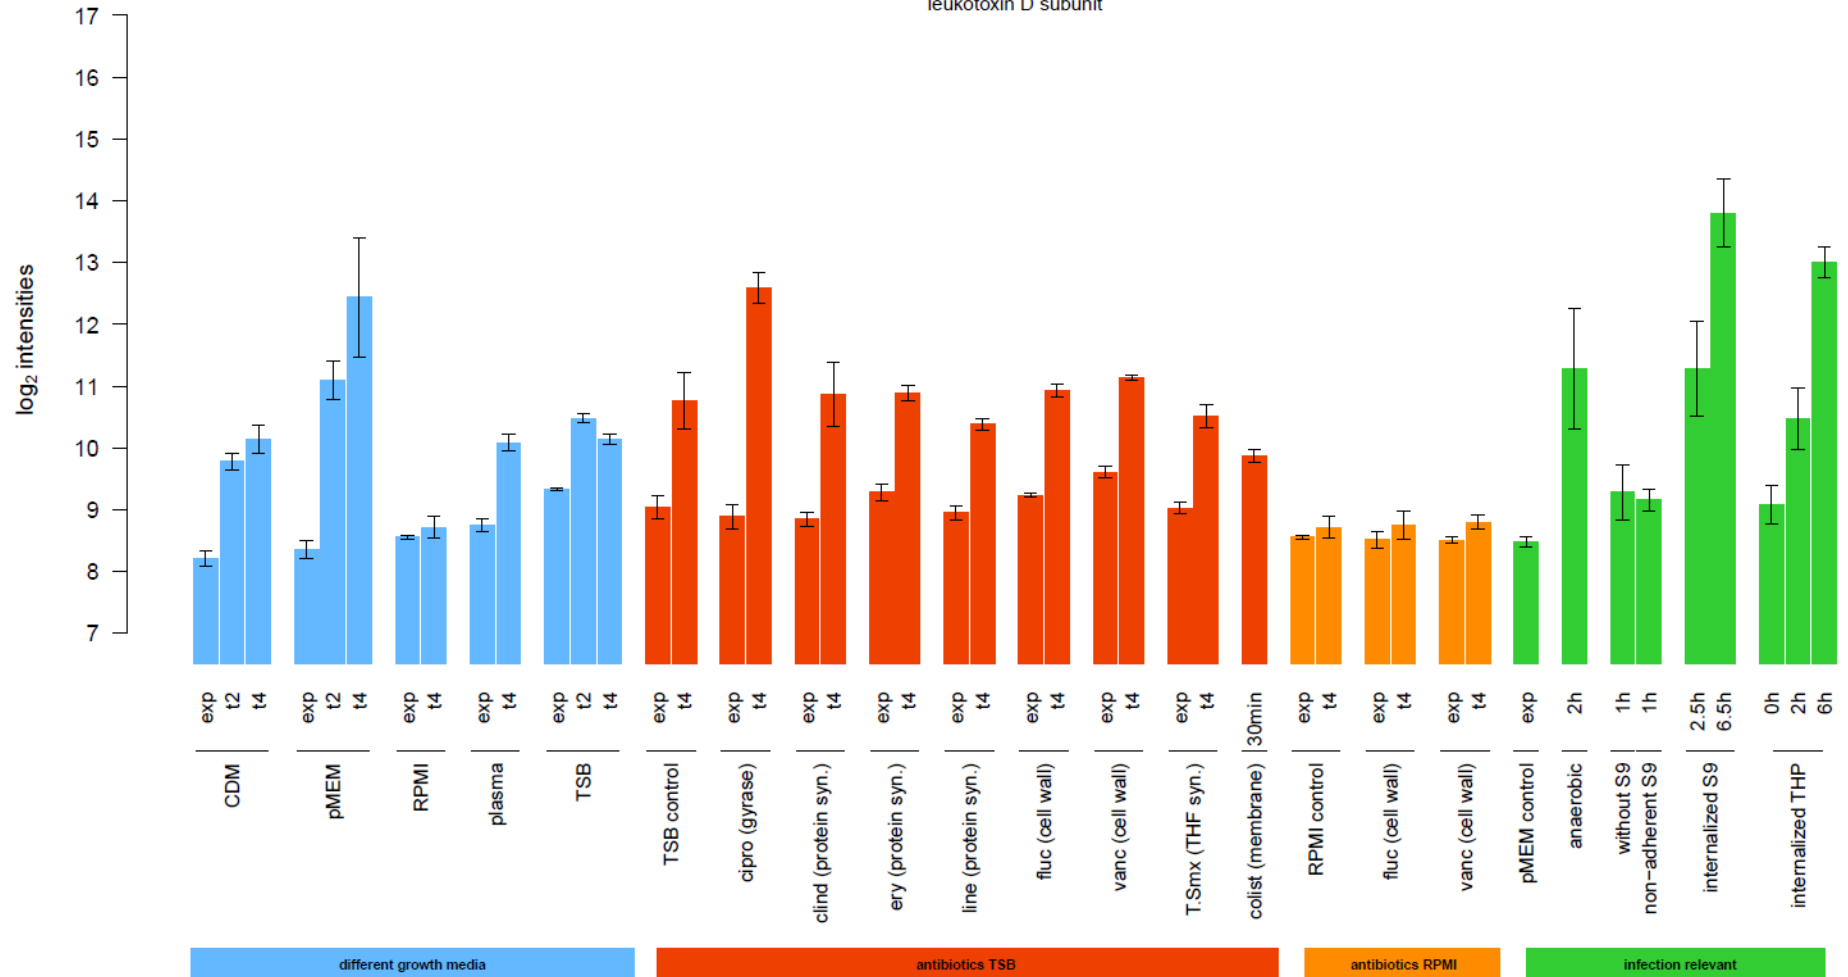

# SAOUHSC\_02709 - hlgC

leukotoxin E subunit

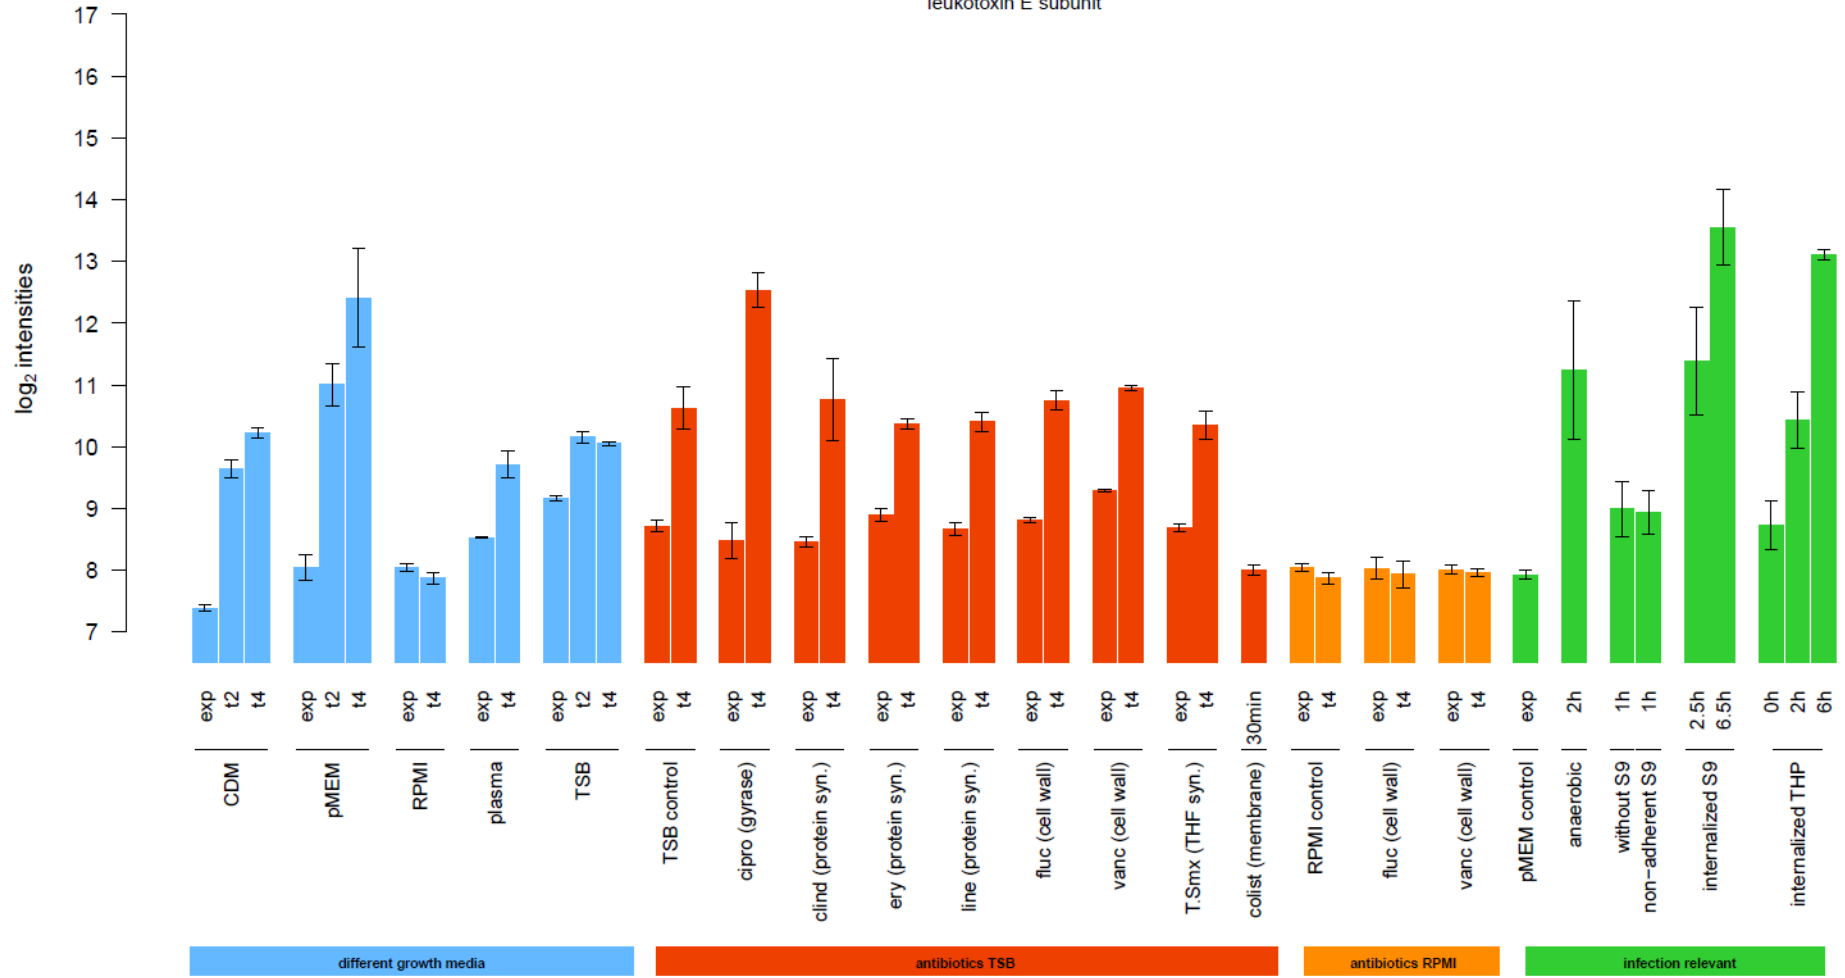

# SAOUHSC\_01955 - luke

leukotoxin S-subunit

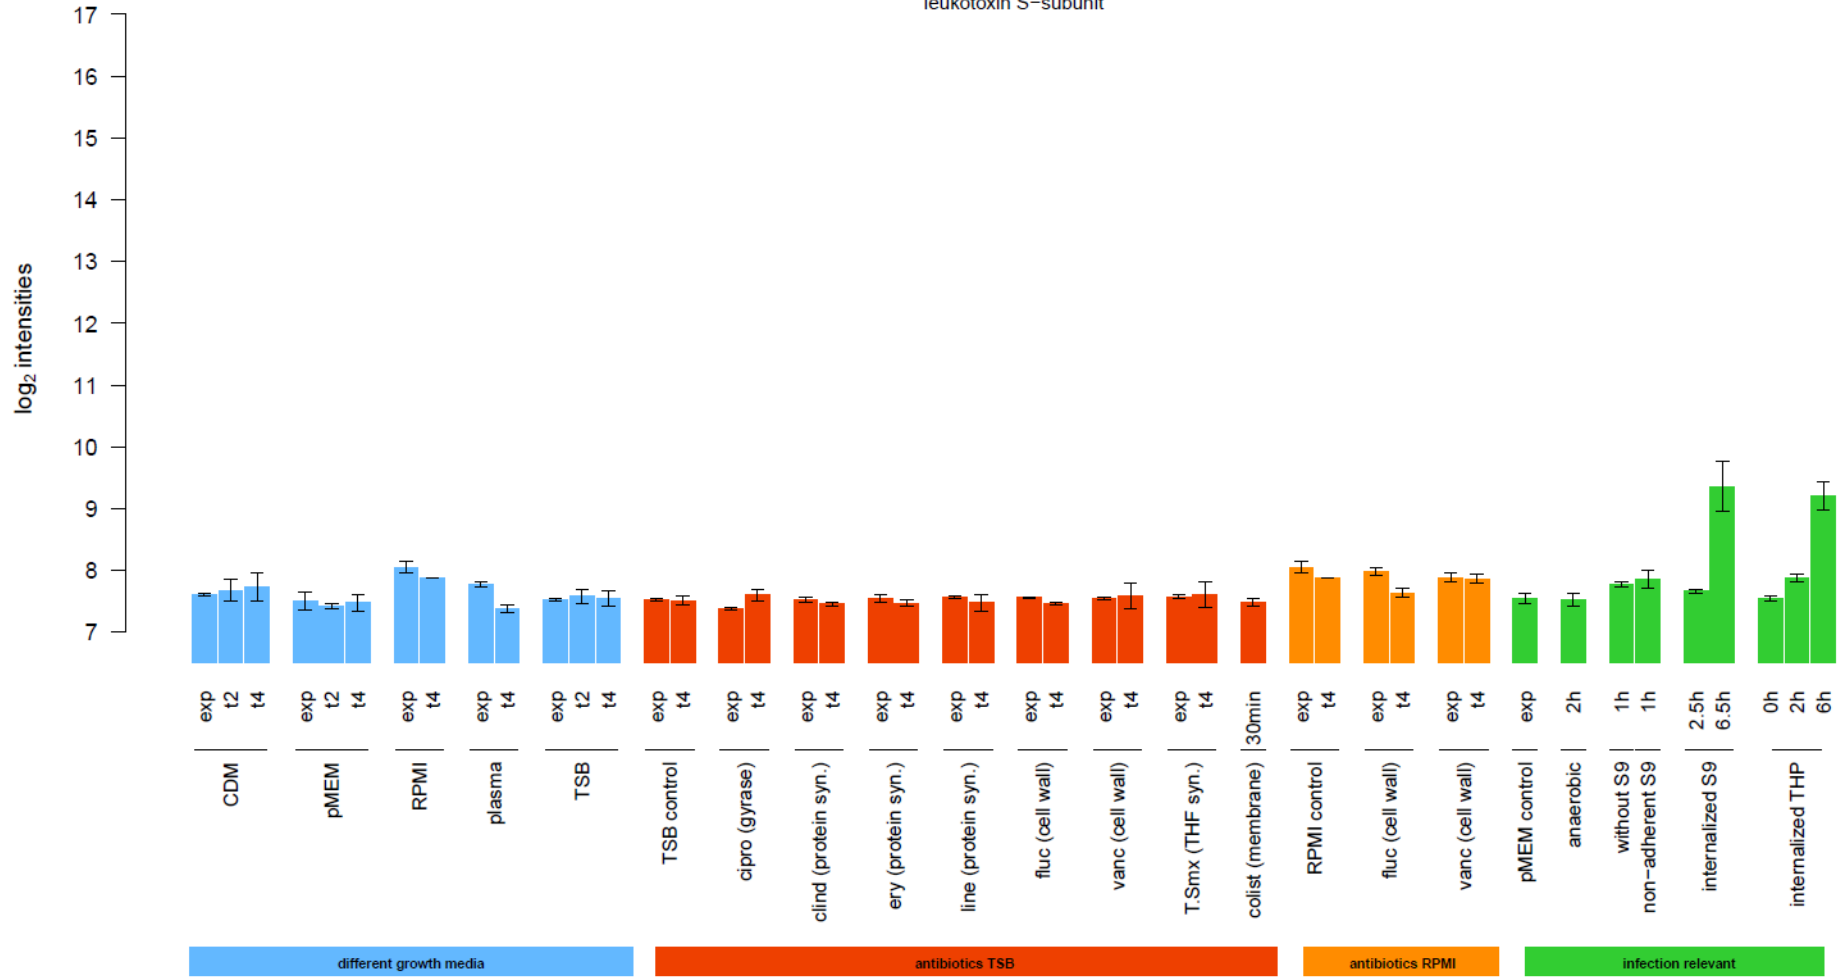



# SAOUHSC\_01954 - IukD

leukotoxin D subunit

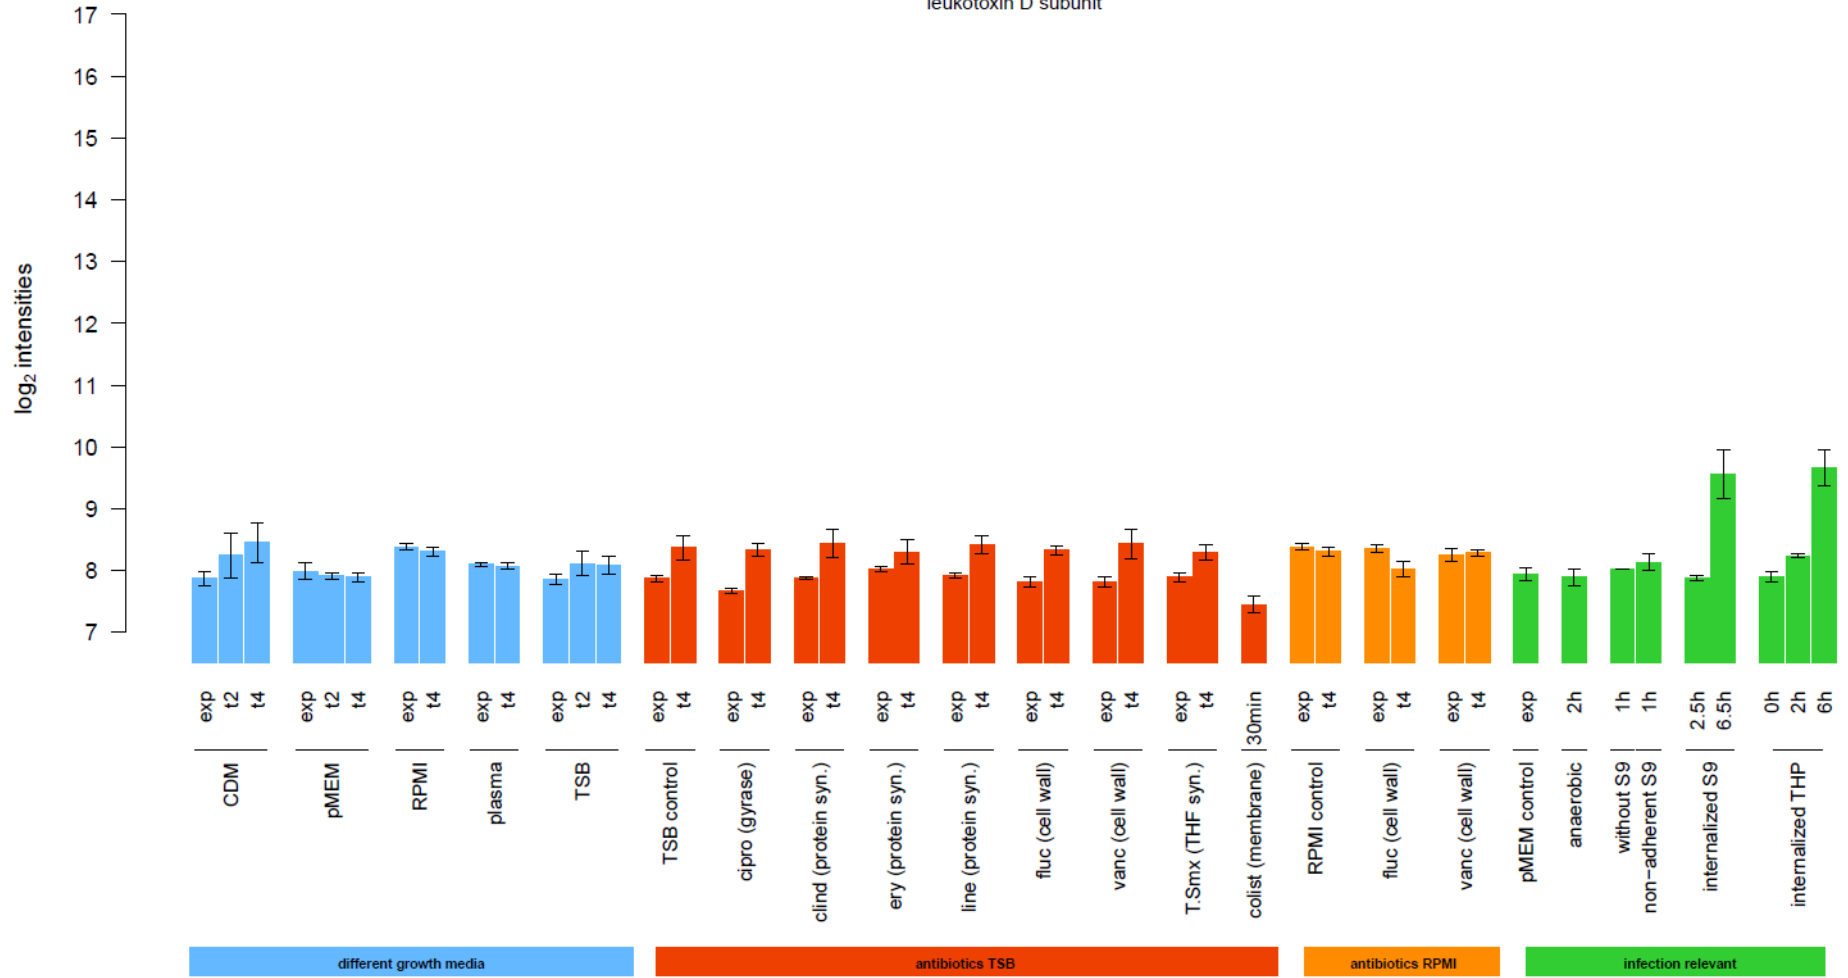

SAOUHSC\_02241 - SAOUHSC\_02241  
leukocidin/hemolysin toxin family protein

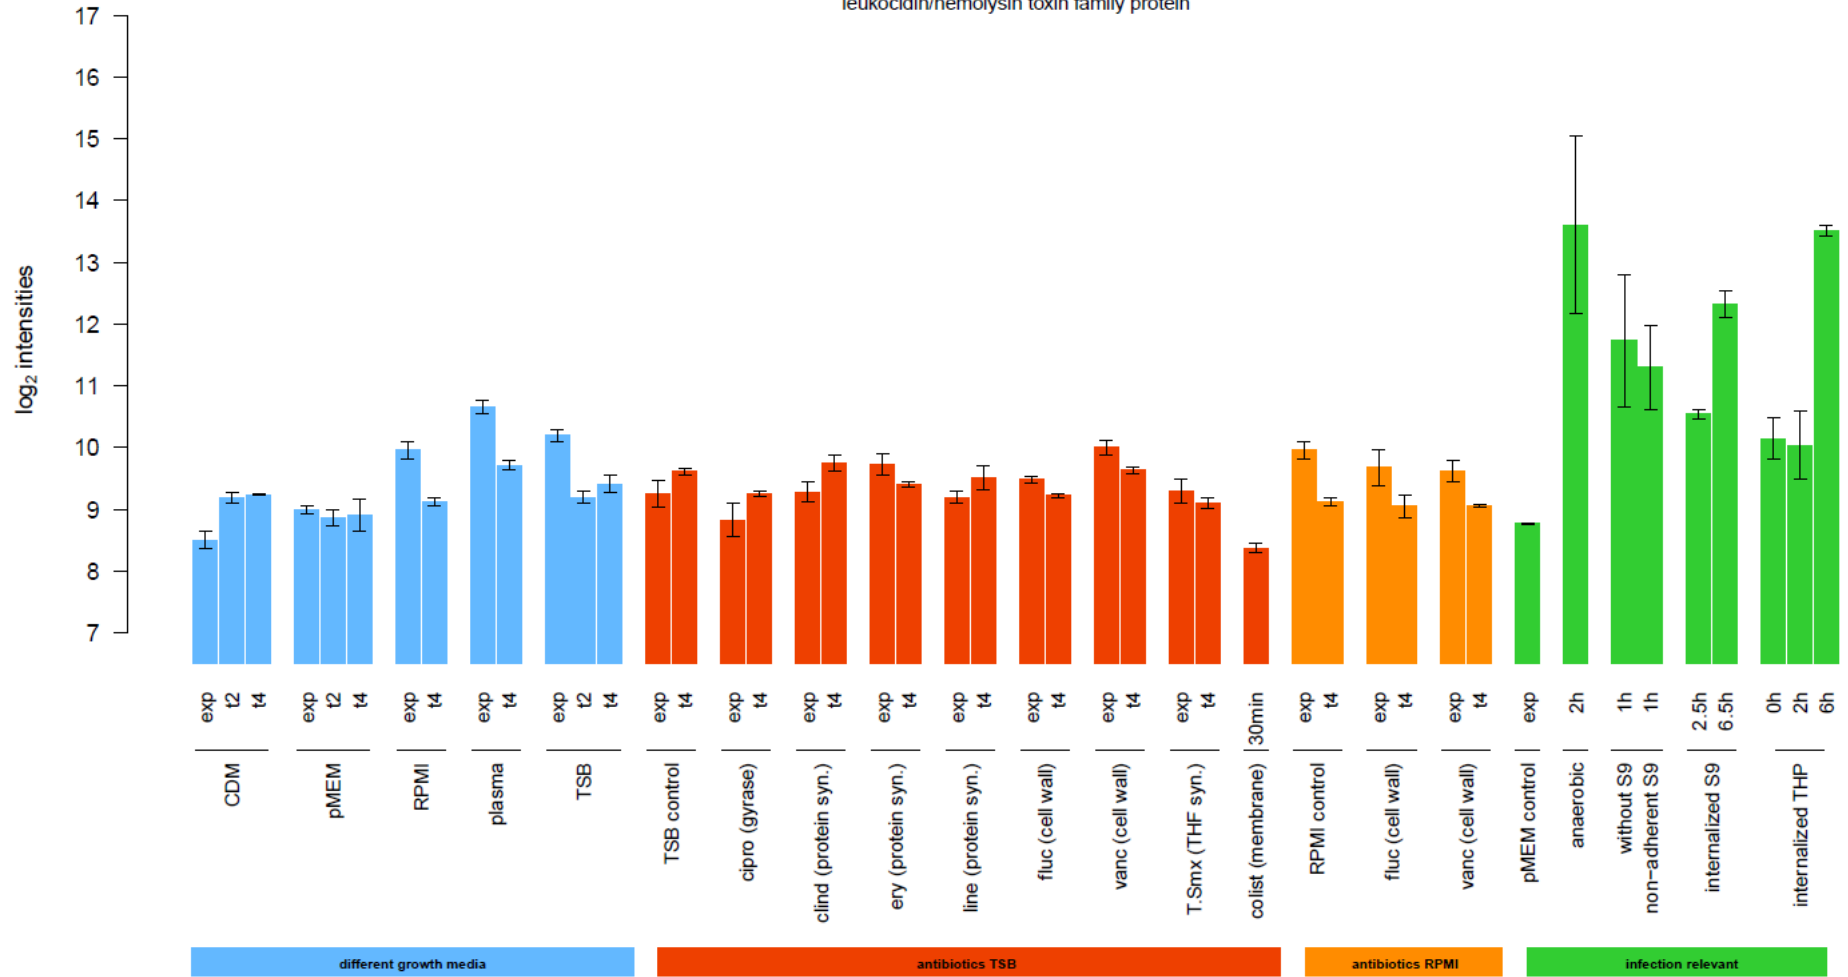

# SAOUHSC\_02243 - SAOUHSC\_02243

leukocidin S subunit

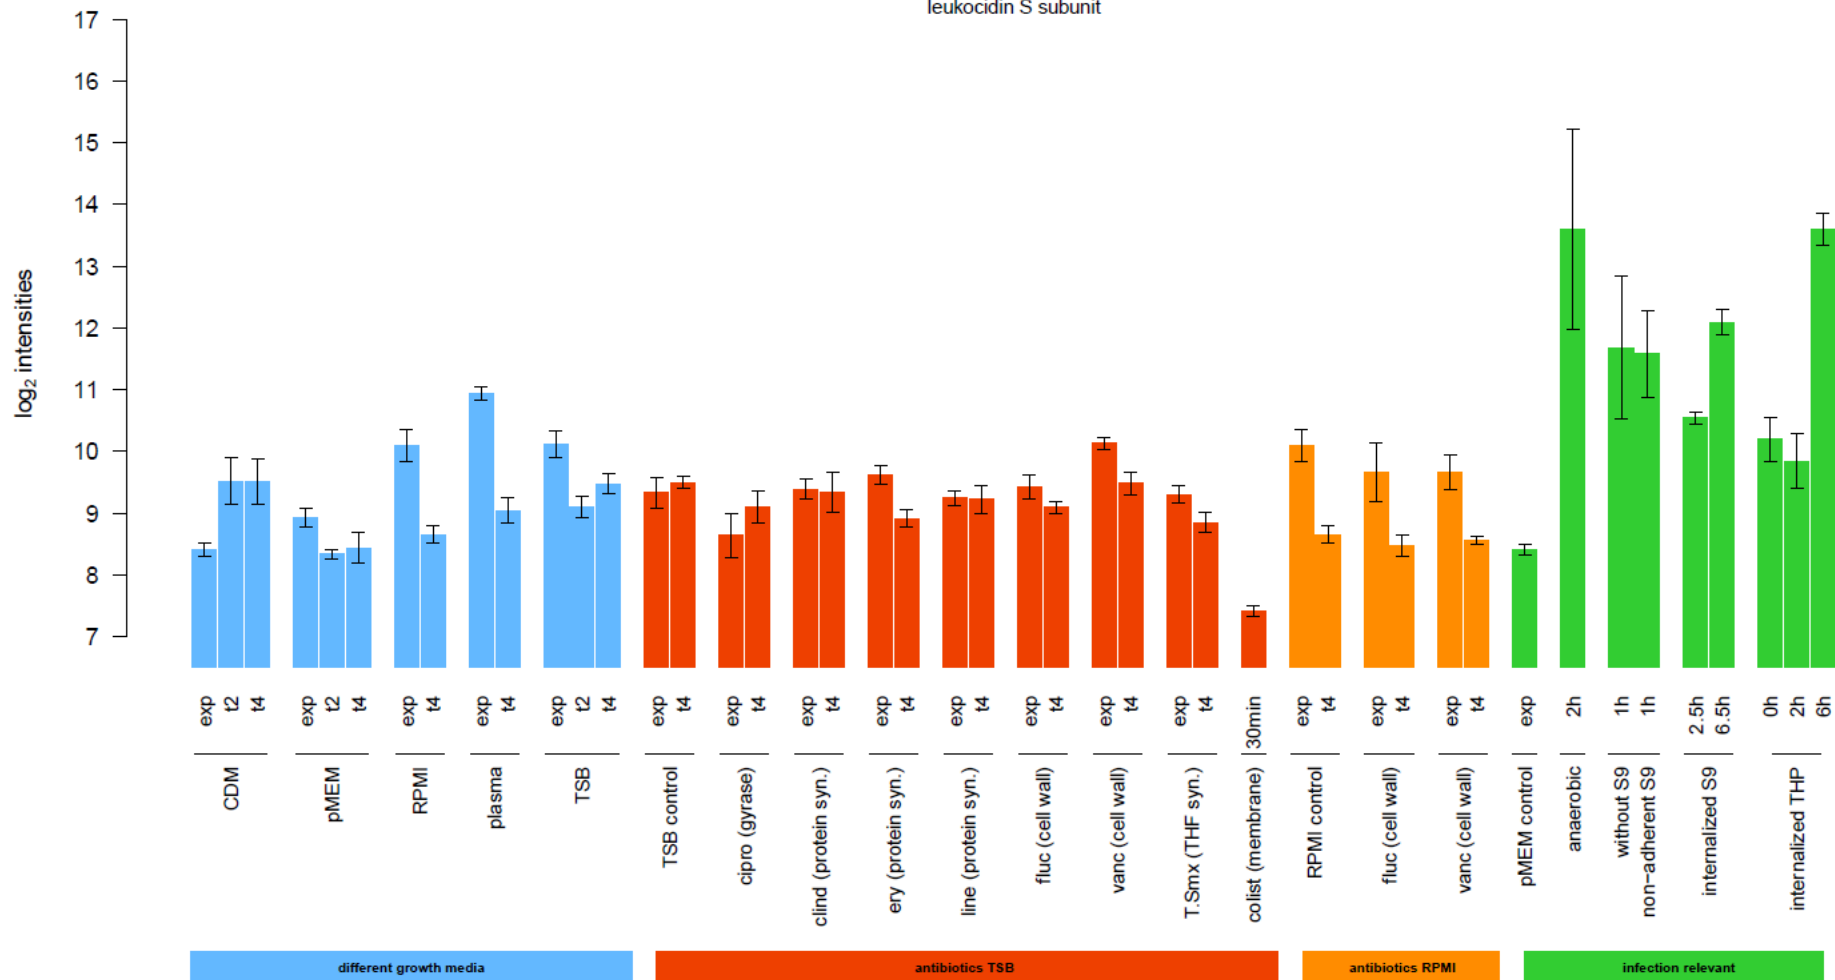

# SAOUHSC\_02260 - hld

Delta lysin

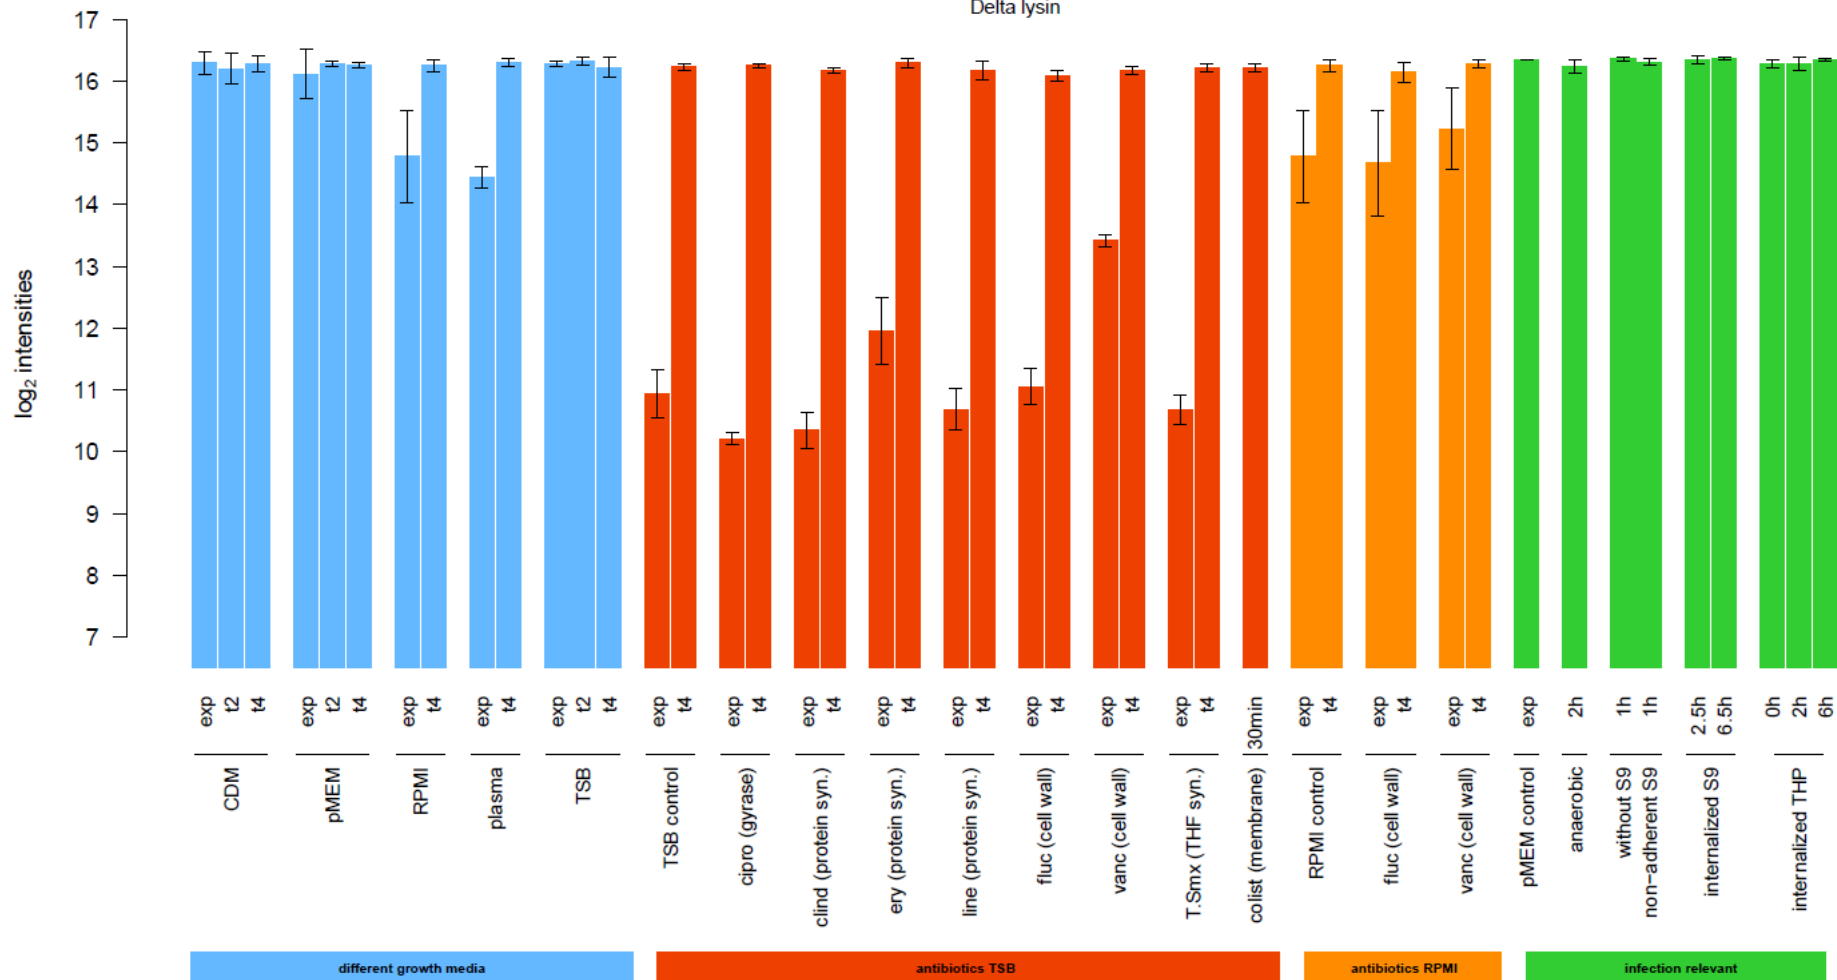

# SAOUHSC\_01136 - SAOUHSC\_01136

*Staphylococcus haemolyticus*

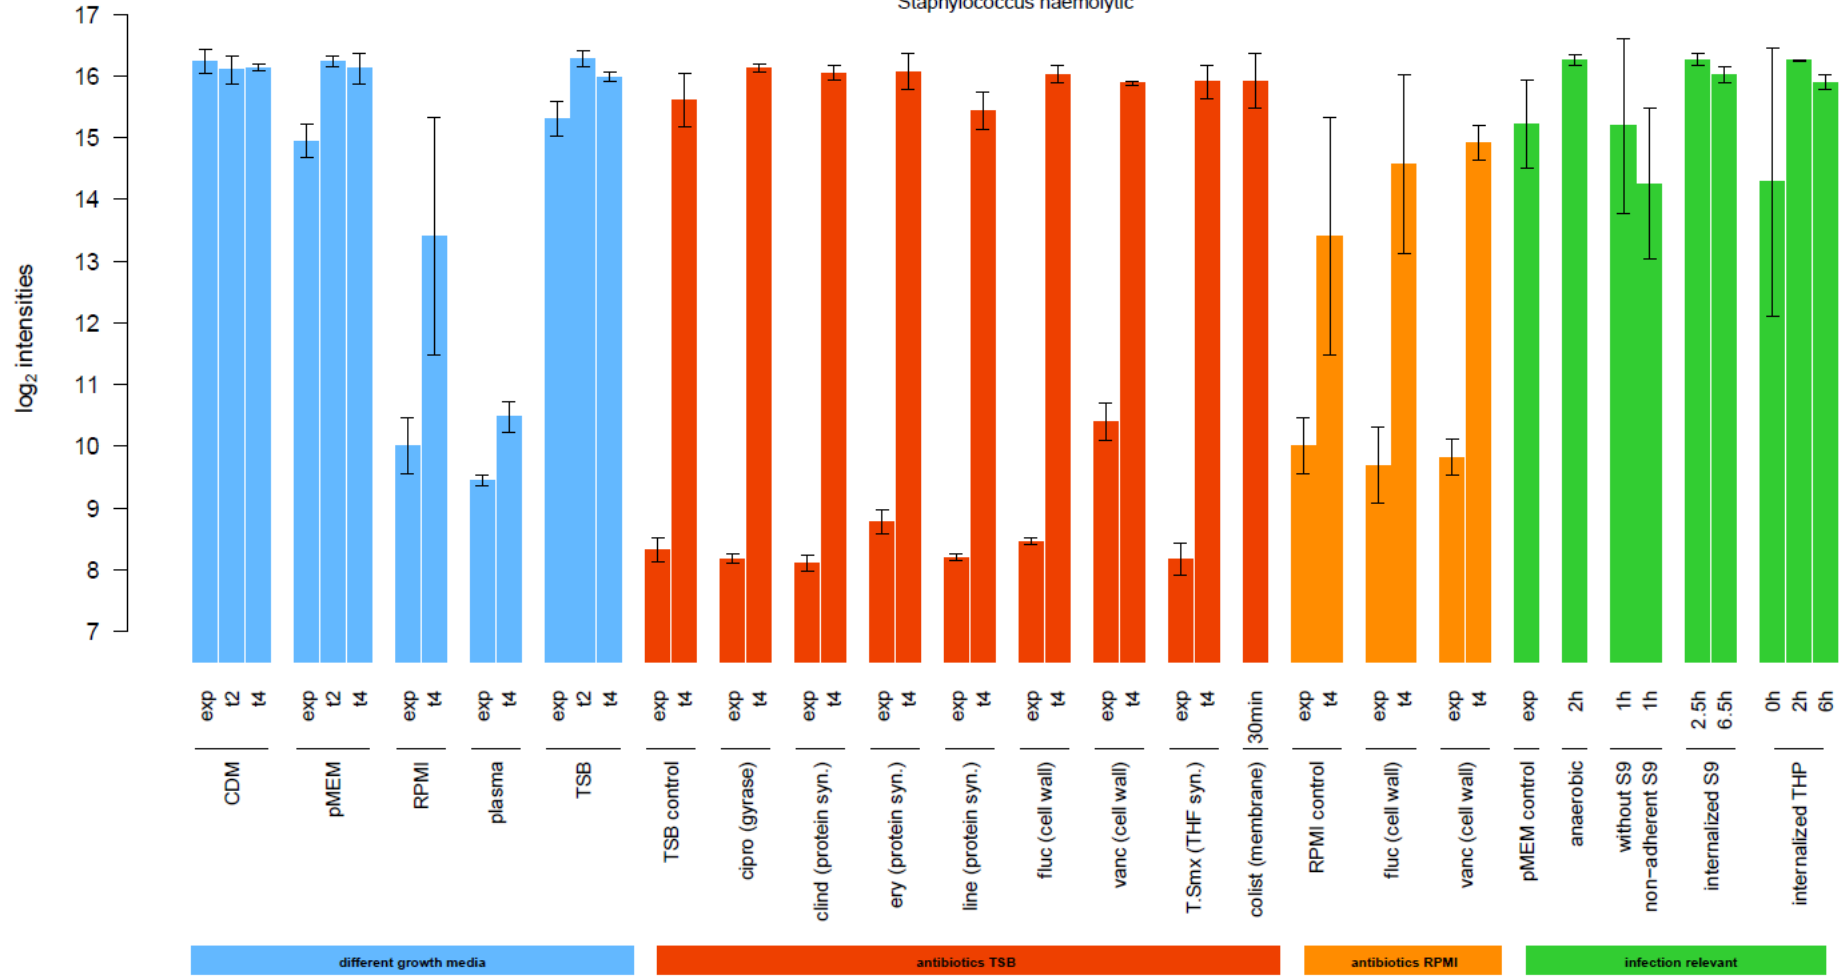

# SAOUHSC\_01135 - SAOUHSC\_01135

Staphylococcus haemolytic

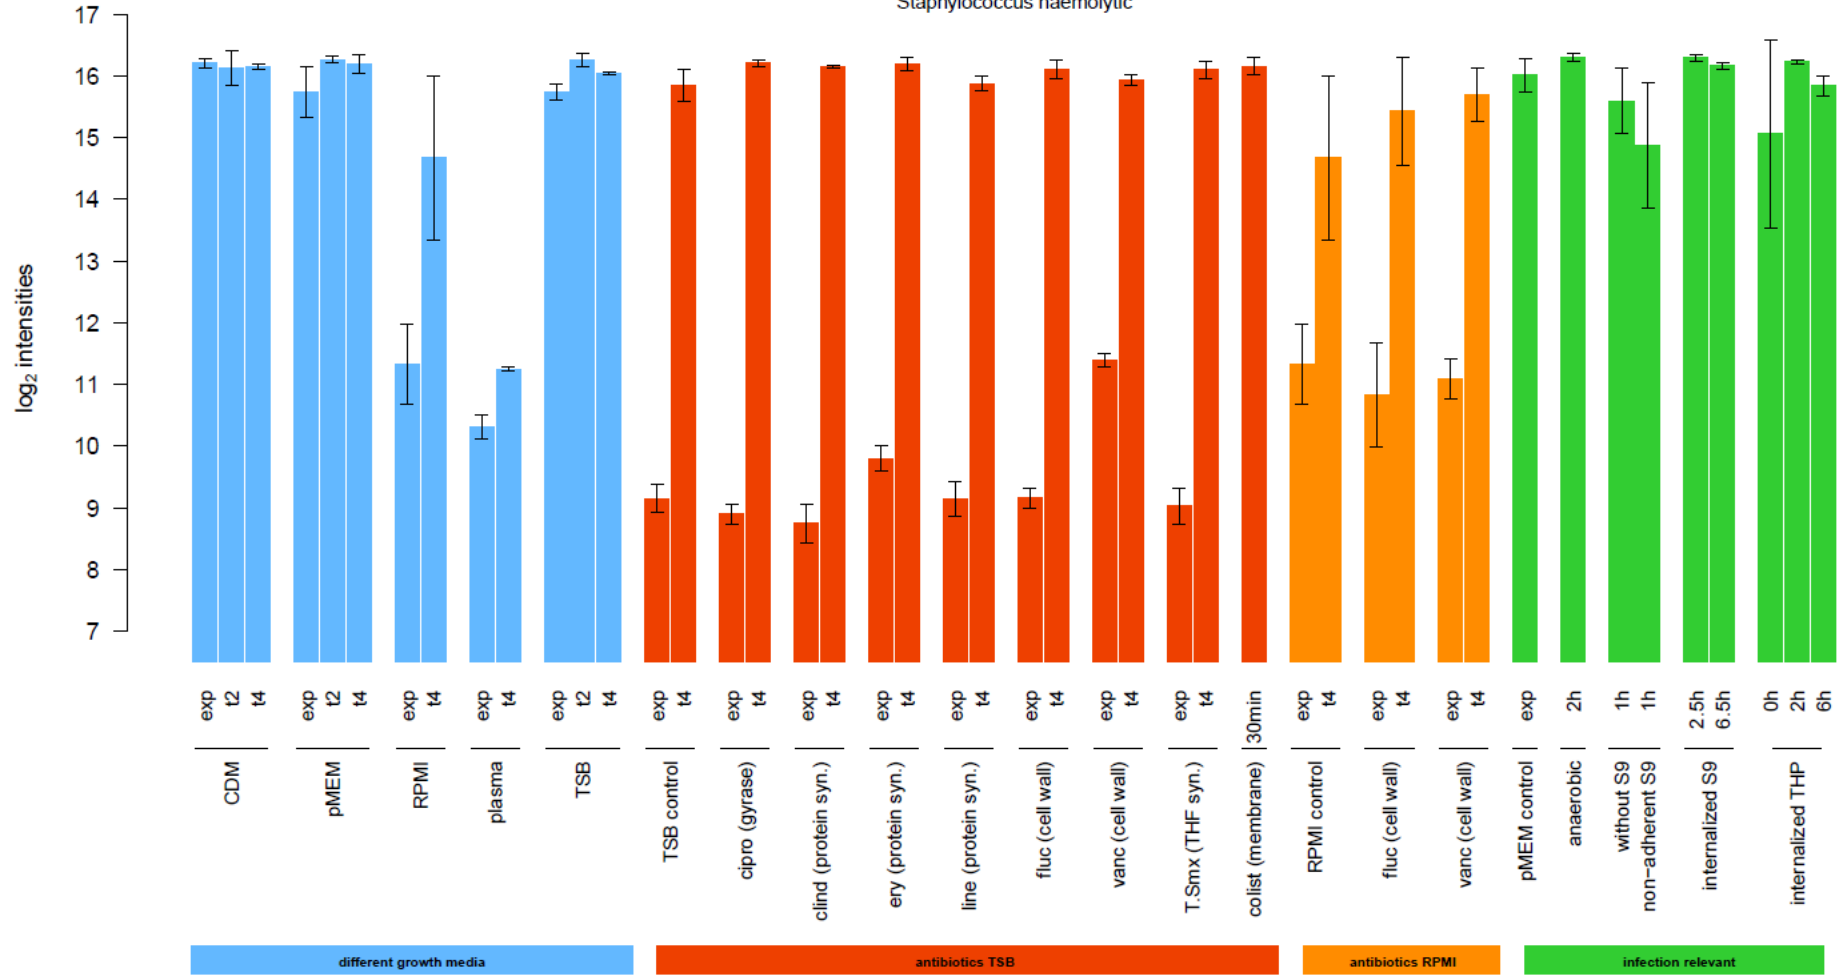

# SAOUHSC\_00988 - sspA

glutamyl endopeptidase

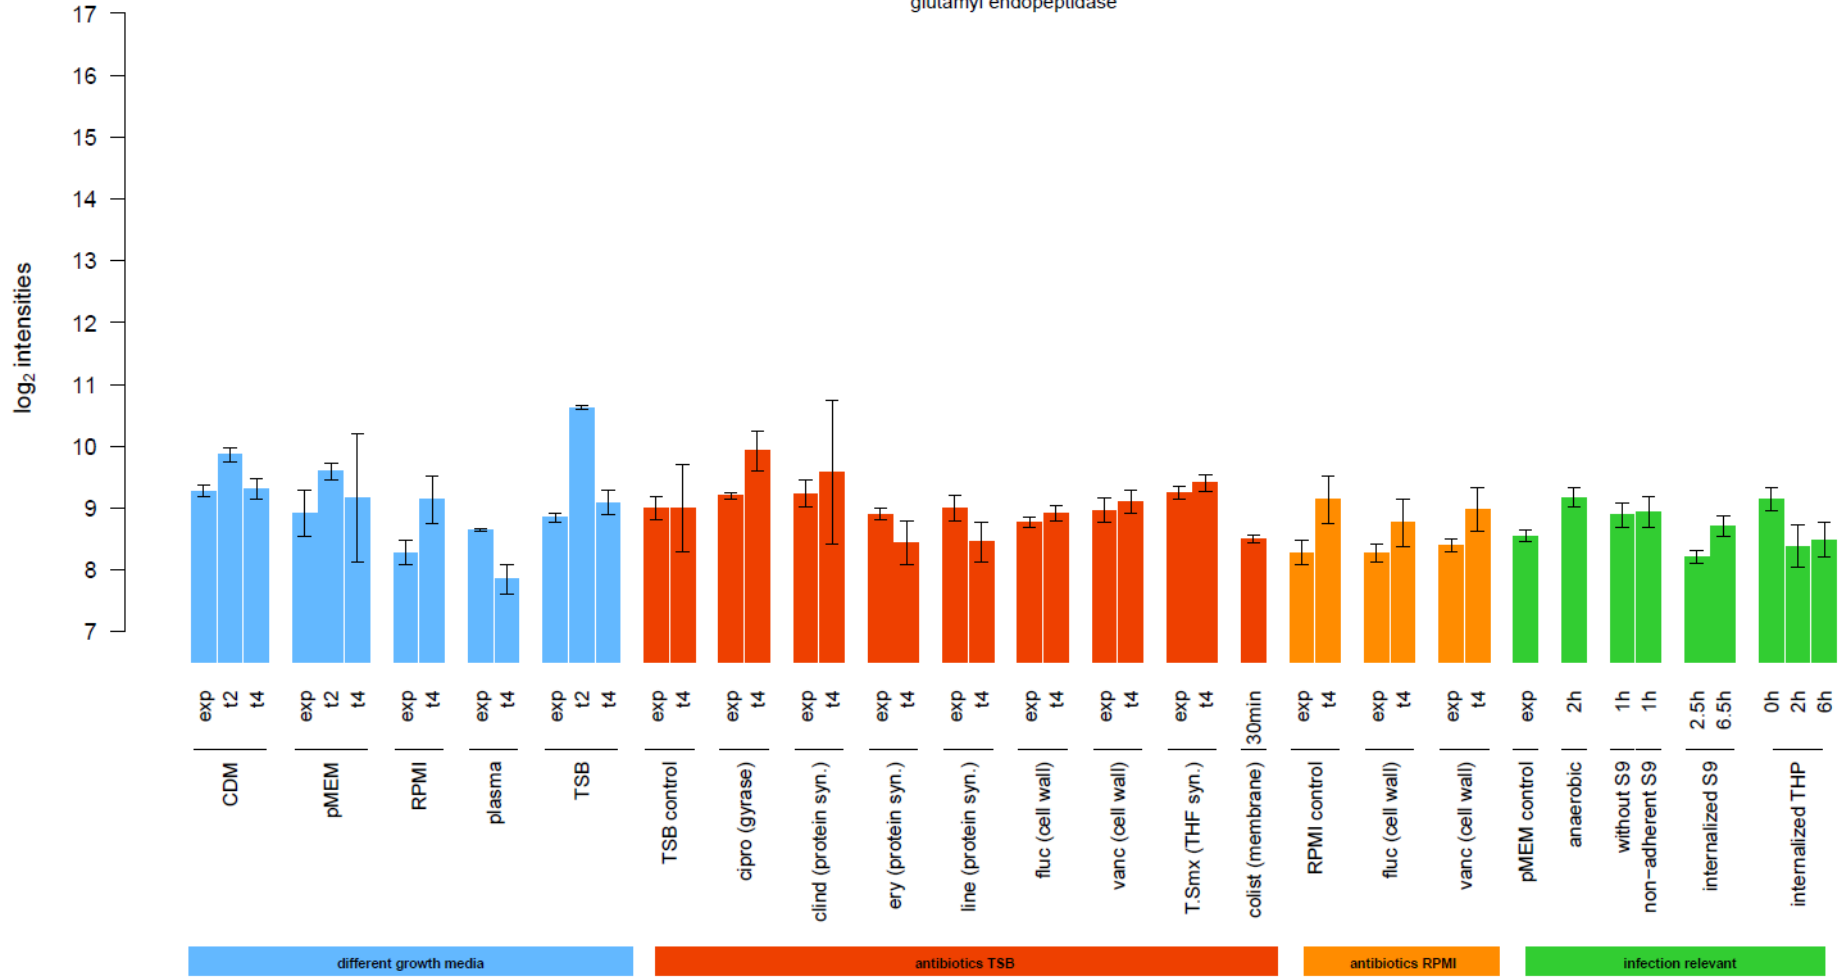

### SAOUHSC\_03006 - lip

=Lipase AltName: Full=Triacylglycerol lipase Contains: RecName: Full=Lipase 86 kDa form Contains: RecName: Full=Lipase 46 kDa form Flags: Precursor

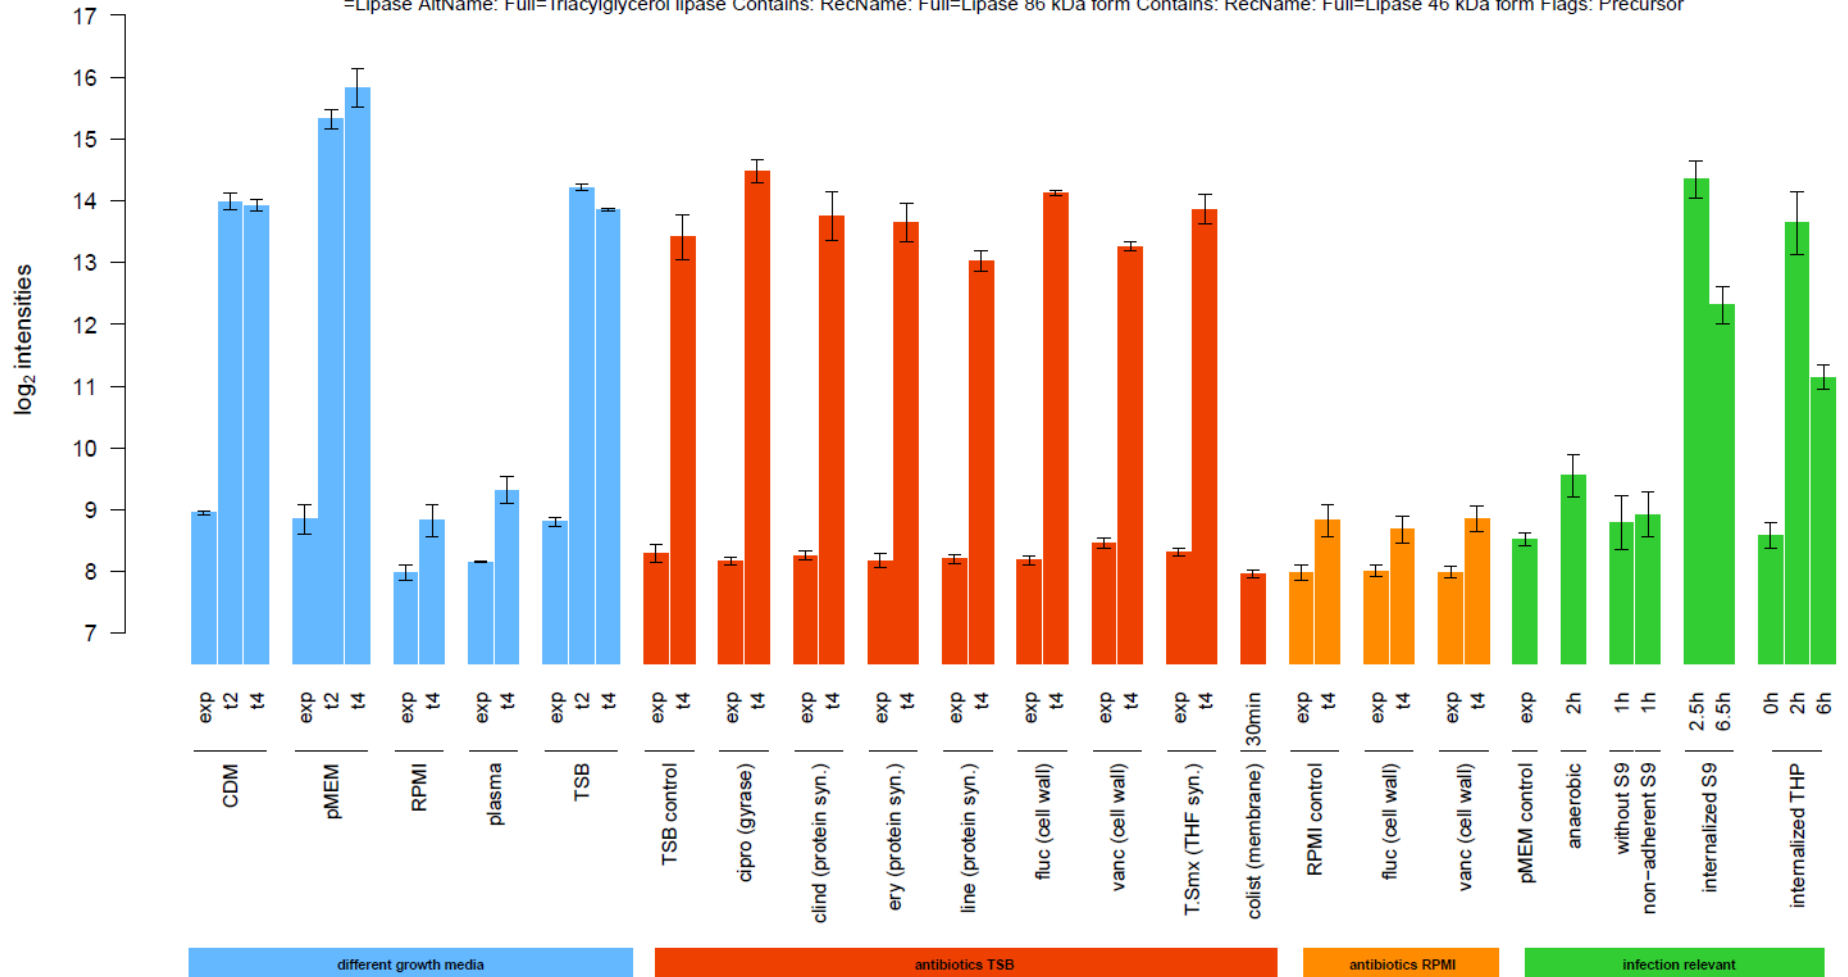



# SAOUHSC\_00818 - nuc1

thermonuclease precursor

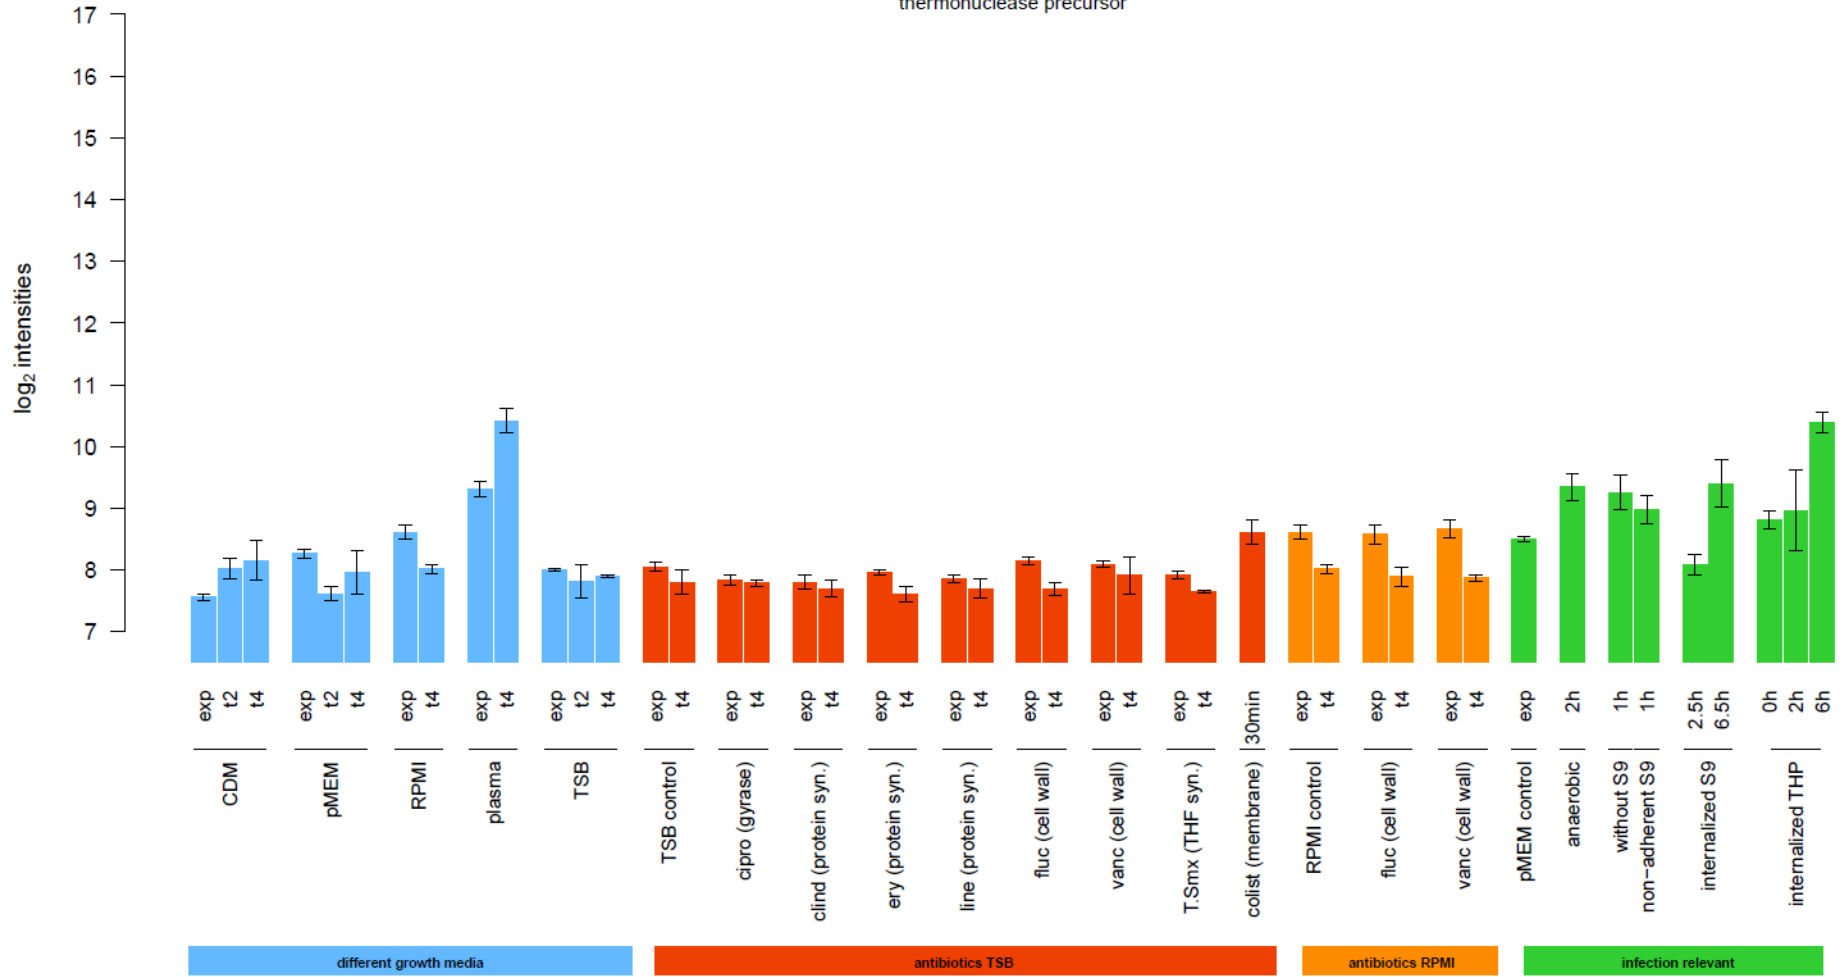

# SAOUHSC\_00051 - plc

phosphatidylinositol-specific phospholipase C, Xregion

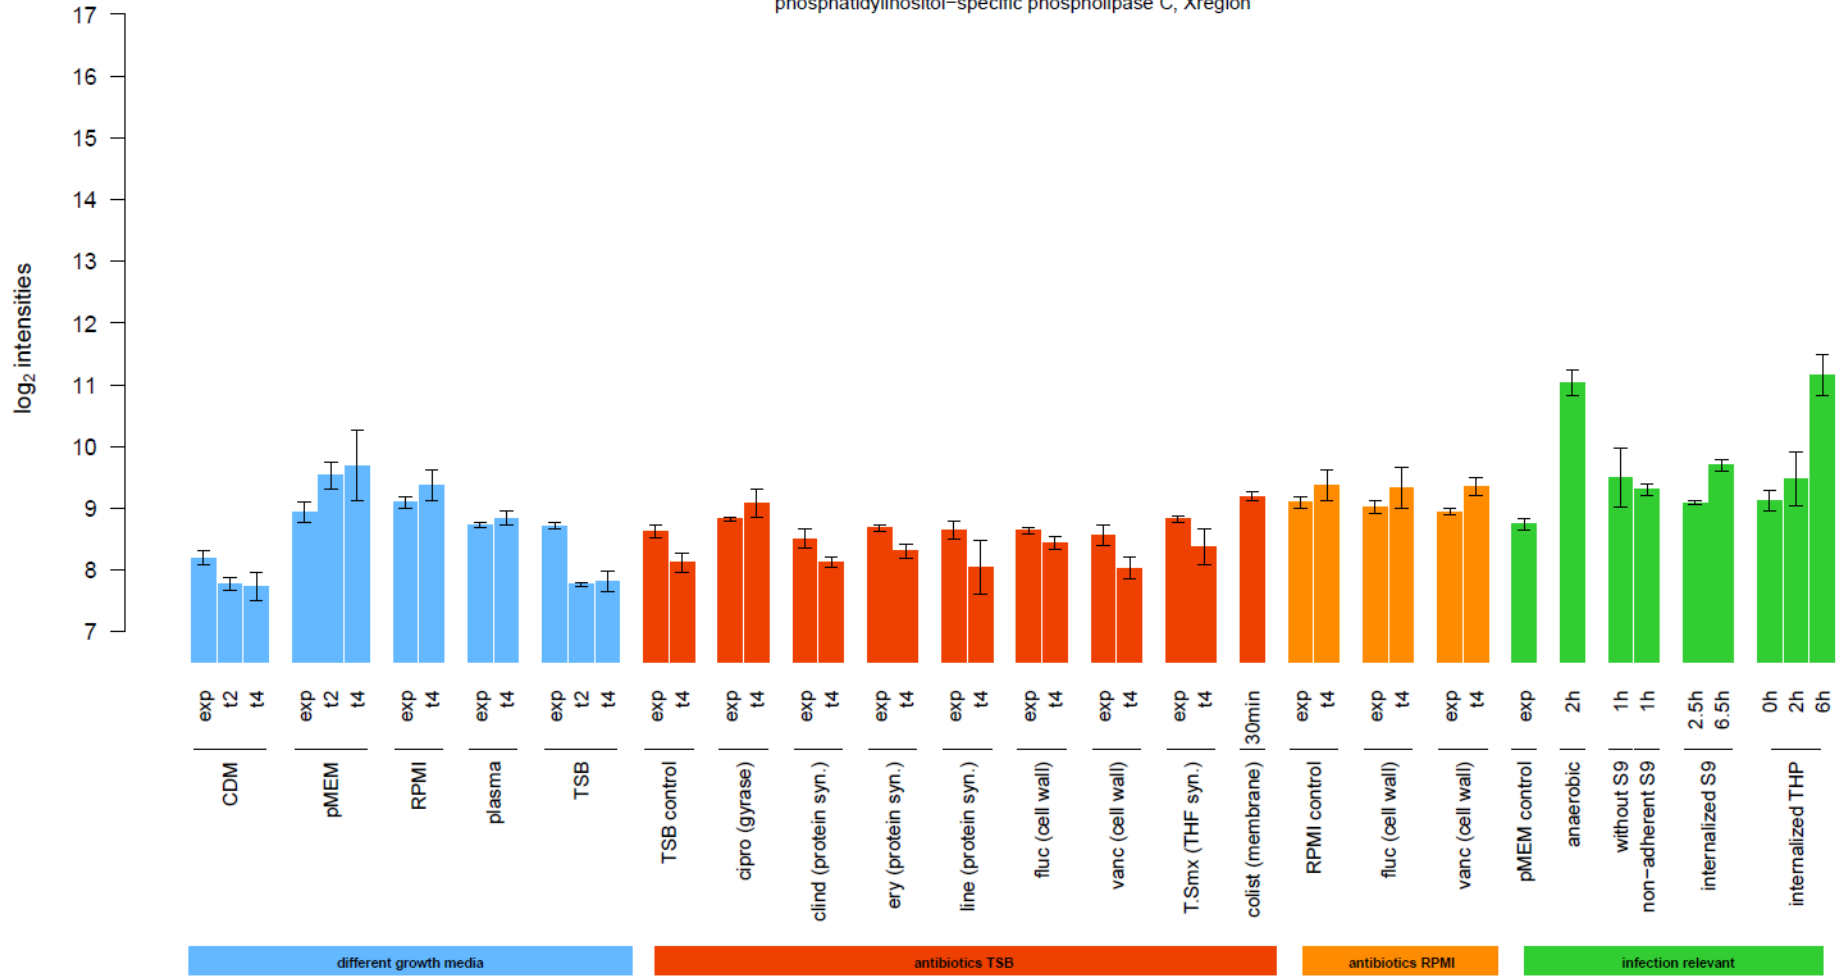

SAOUHSC\_00300 - geh  
triacylglycerol lipase

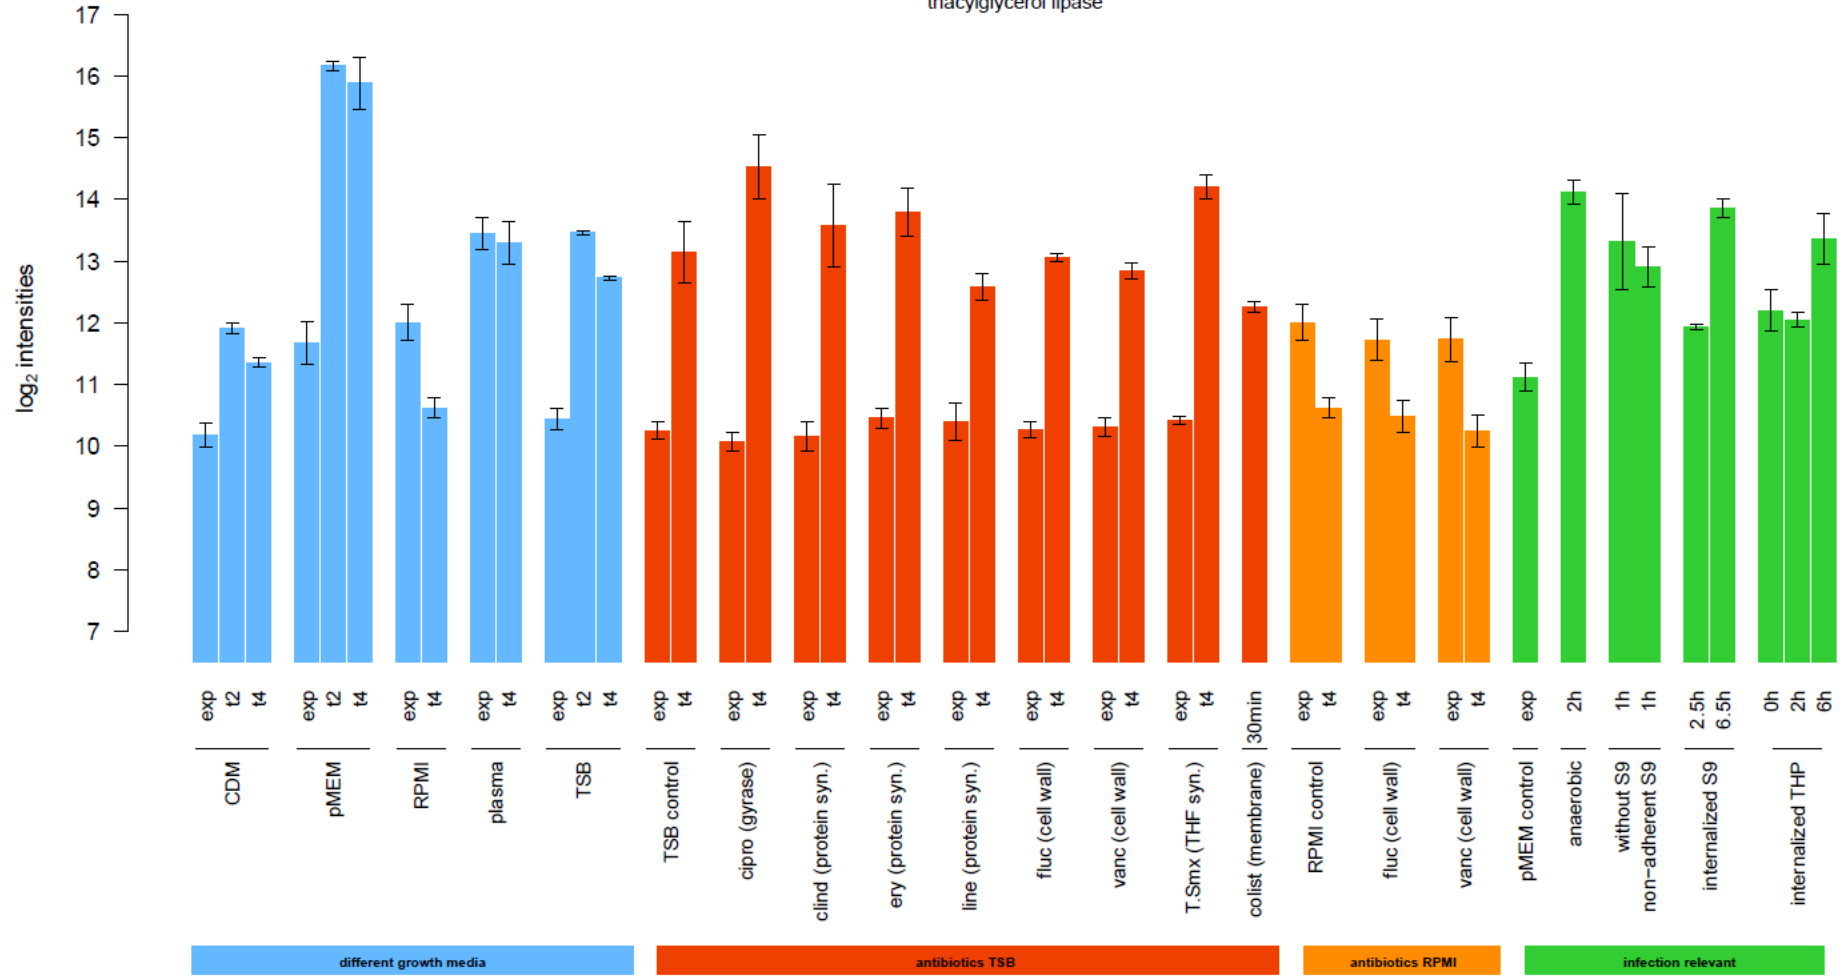

# SAOUHSC\_00987 - sspB

staphopain,cysteine proteinase

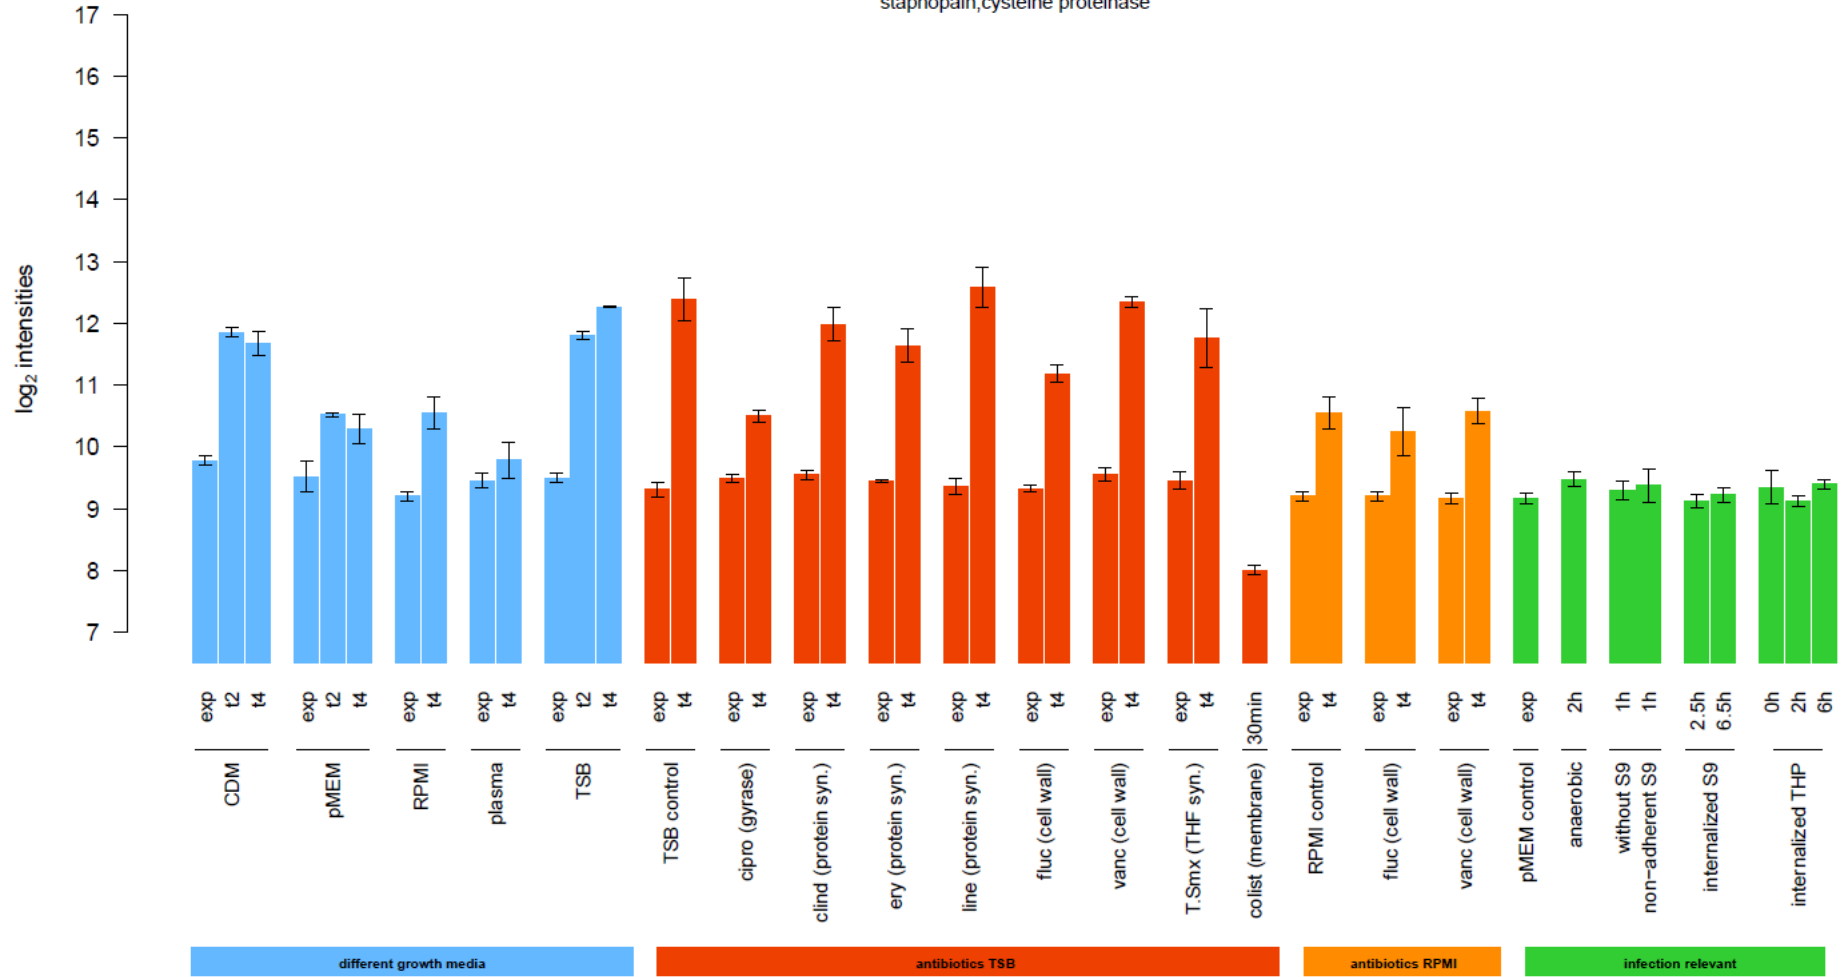

# SAOUHSC\_01939 - spIC

serine proteinase

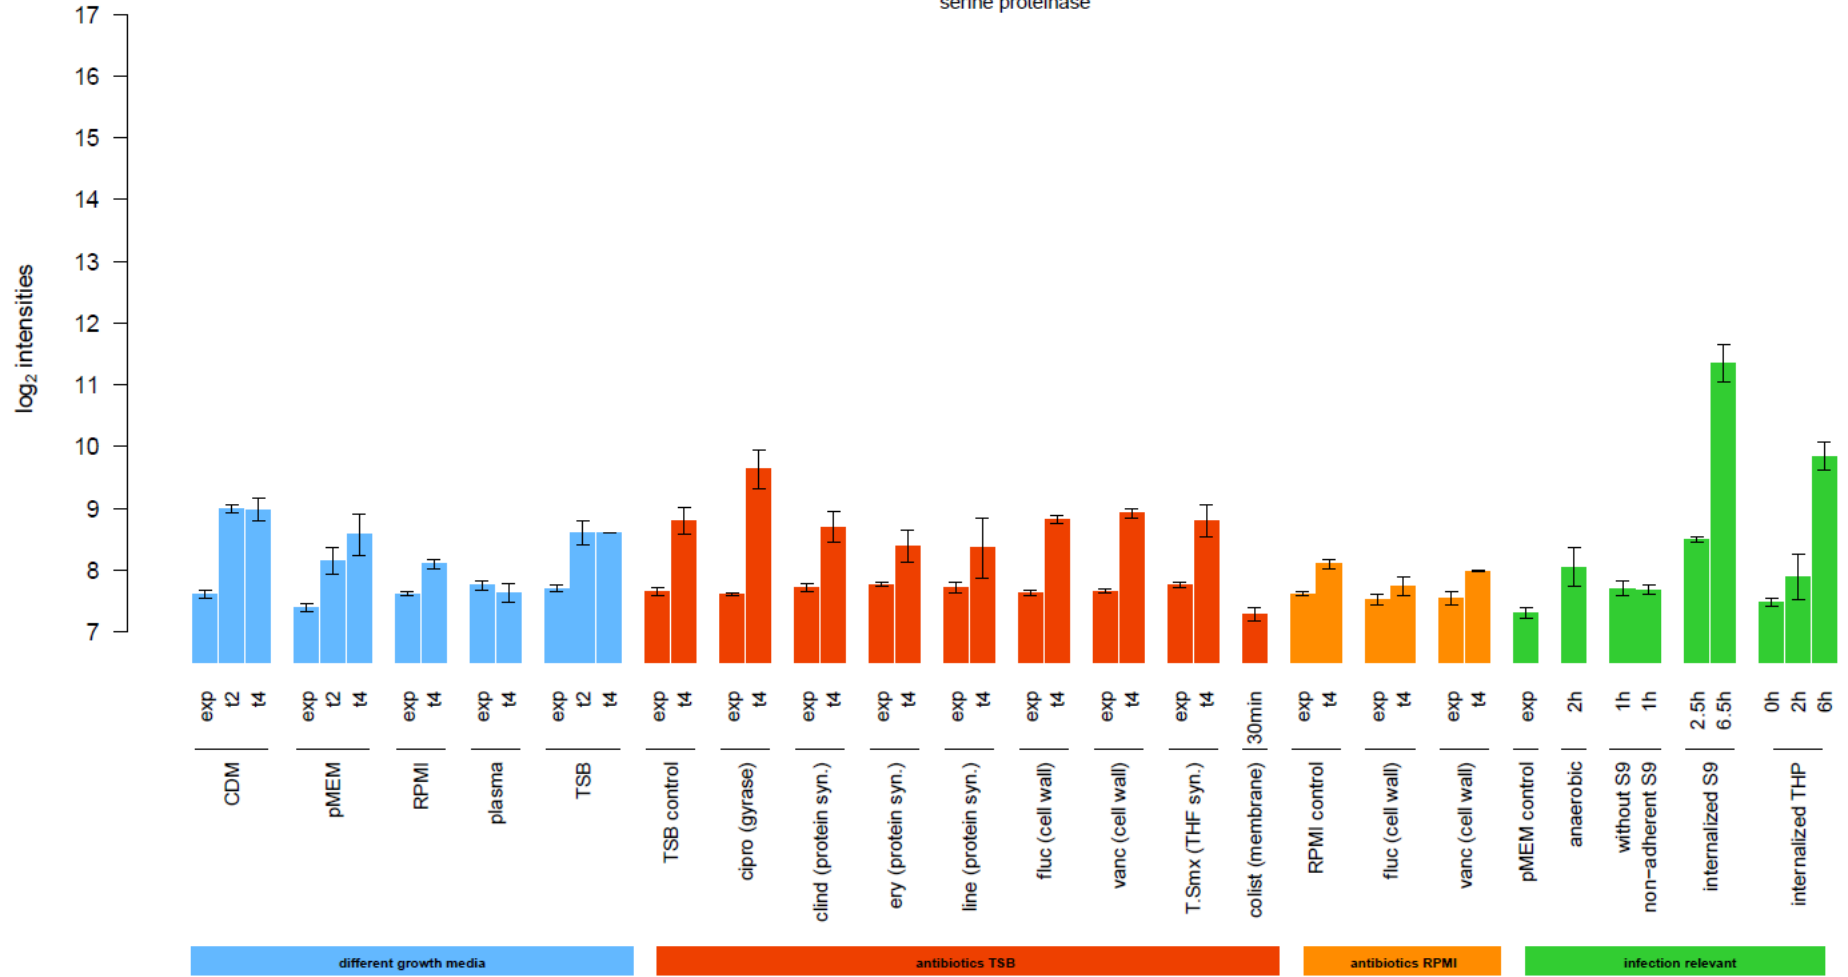

# SAOUHSC\_01941 - spIB

serine proteinase

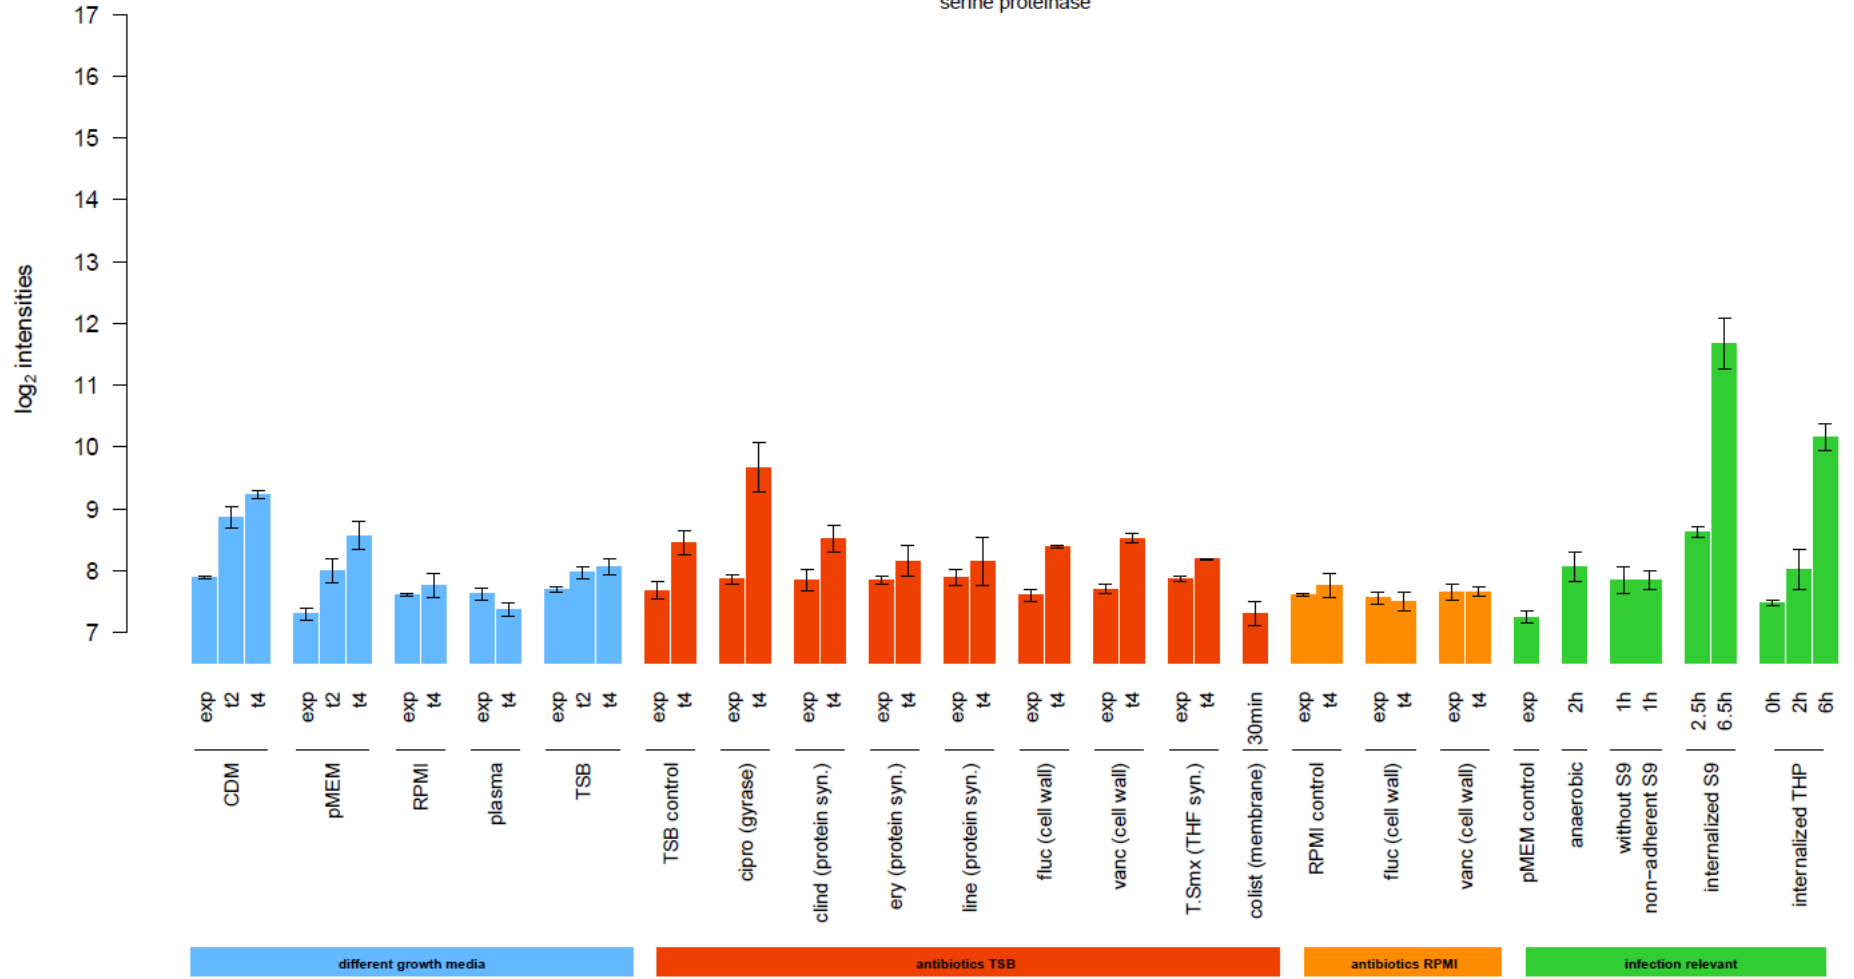

# SAOUHSC\_01942 - splA

serine protease SplB

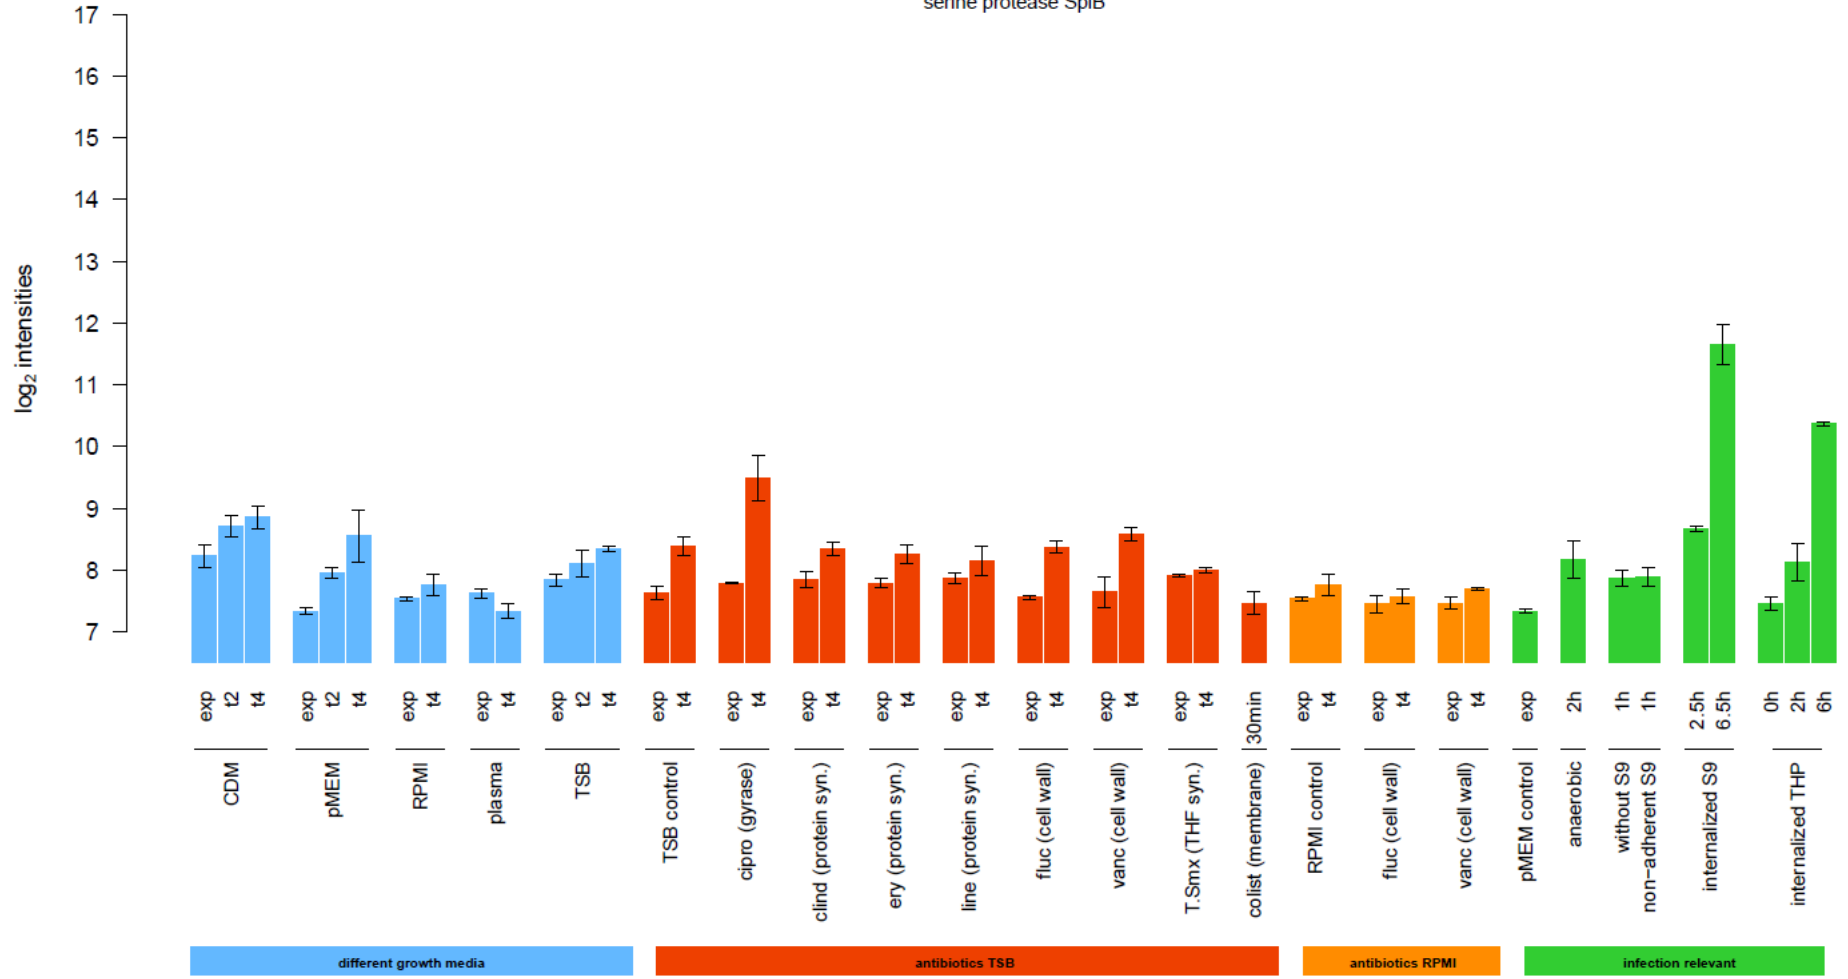

SAOUHSC\_02971 - aur  
zinc metalloproteinase aureolysin precursor

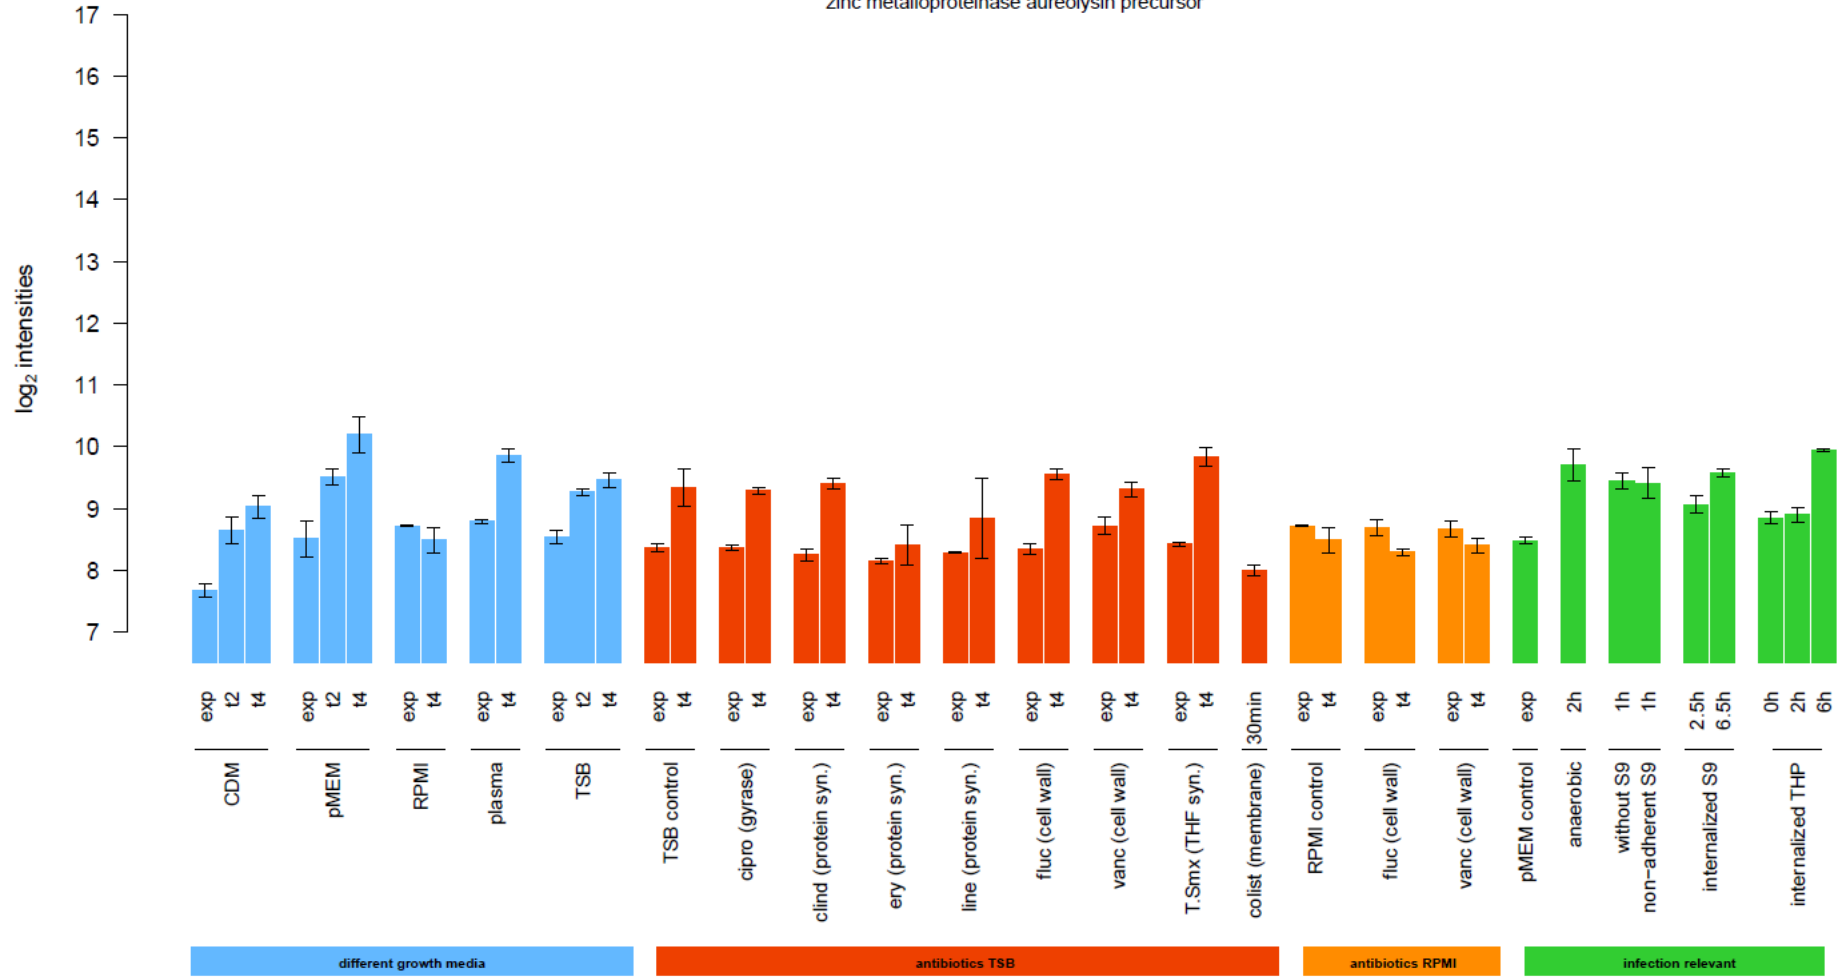



# SAOUHSC\_02463 - hysA

hyaluronate lyase

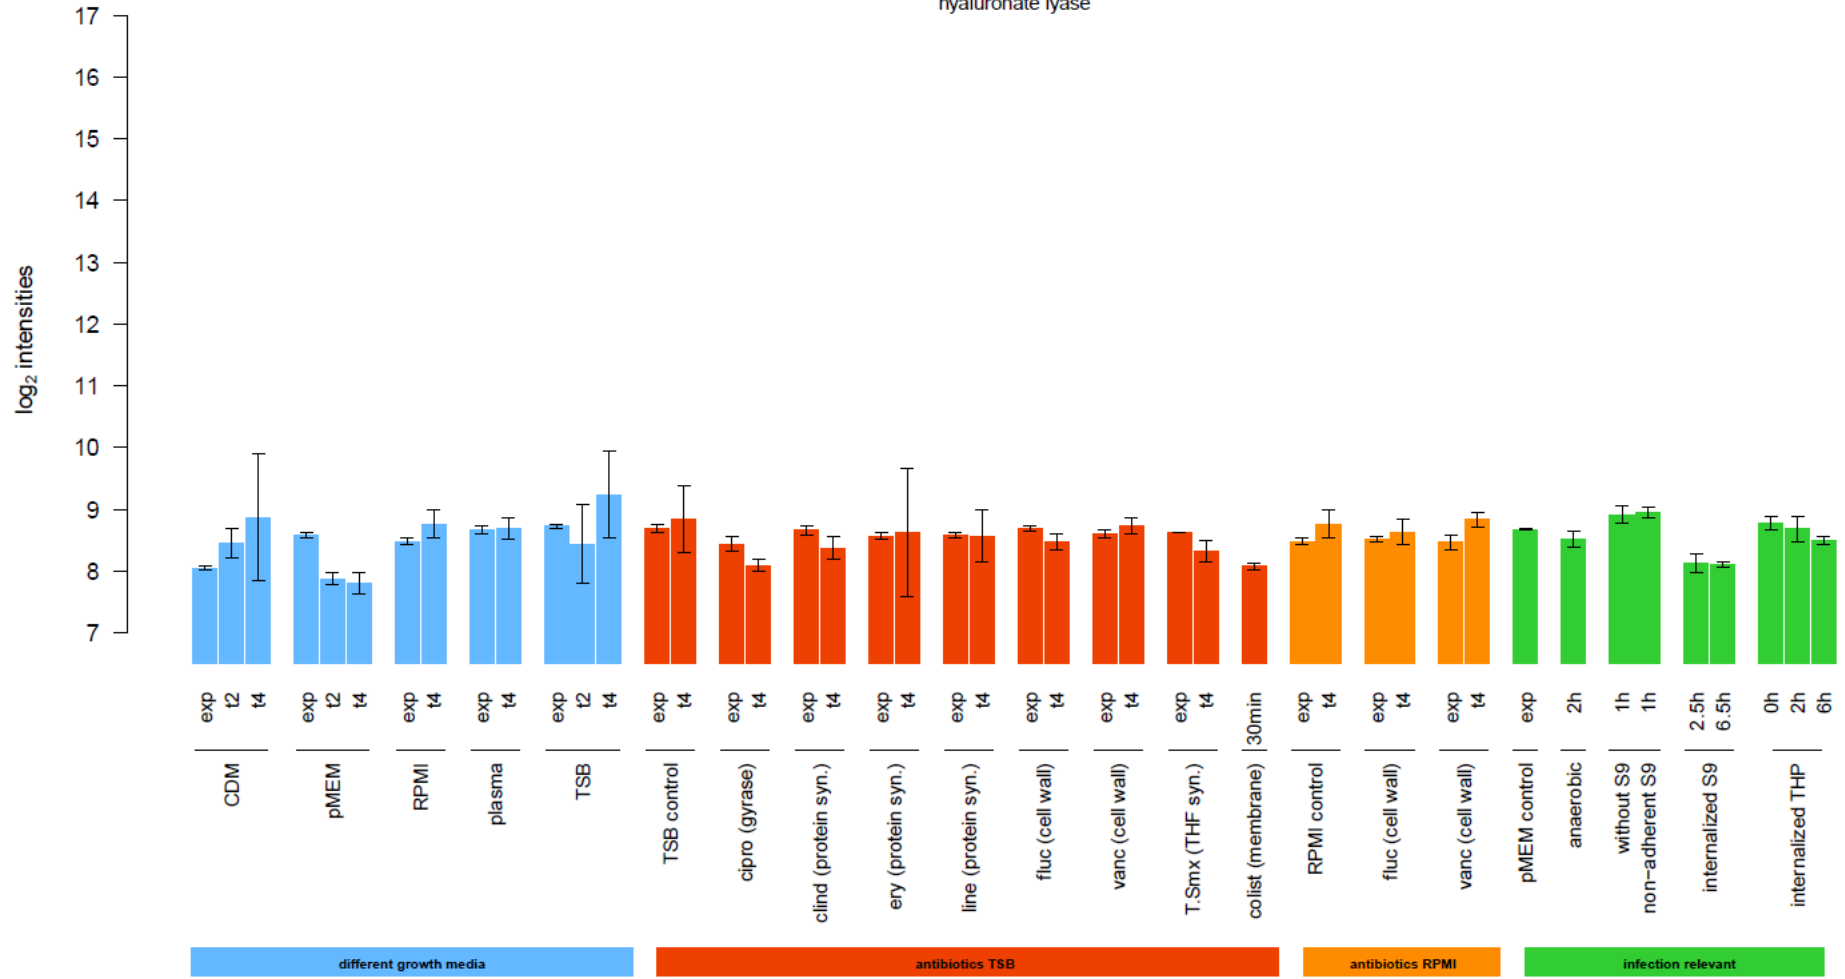

**SAOUHSC\_02169 - chp**  
chemotaxis-inhibiting protein CHIPS

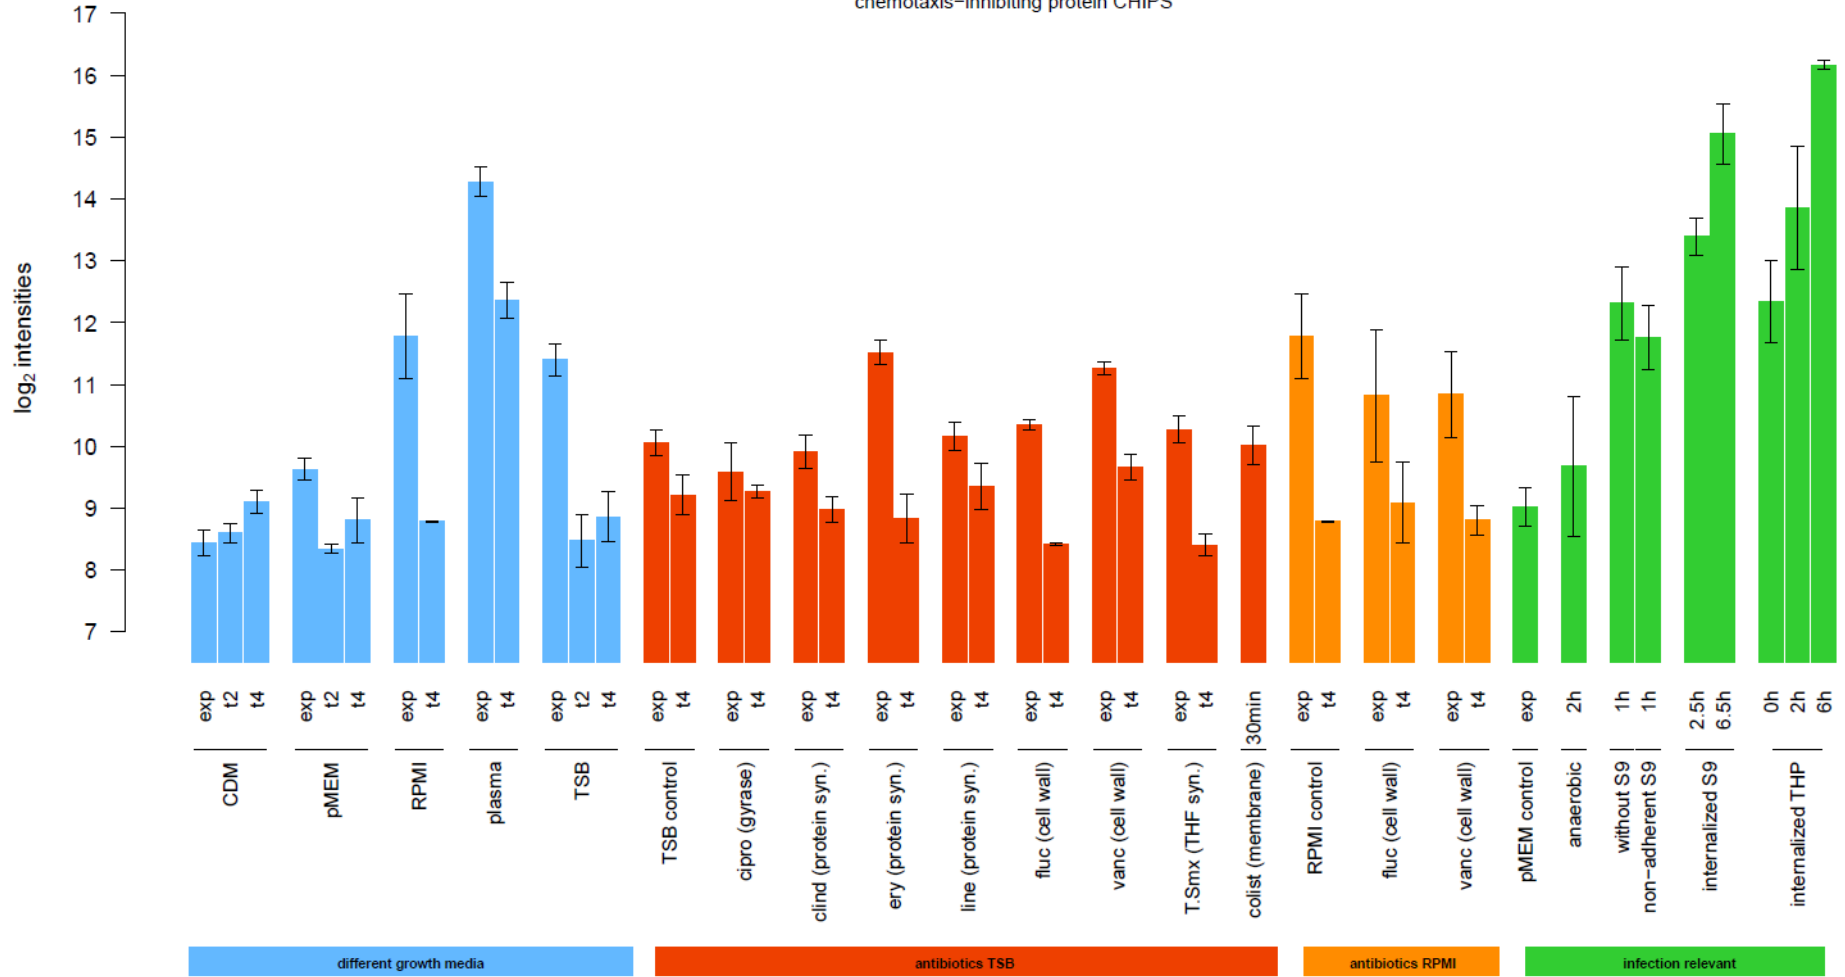

SAOUHSC\_02167 - scn  
staphylococcal complement inhibitor

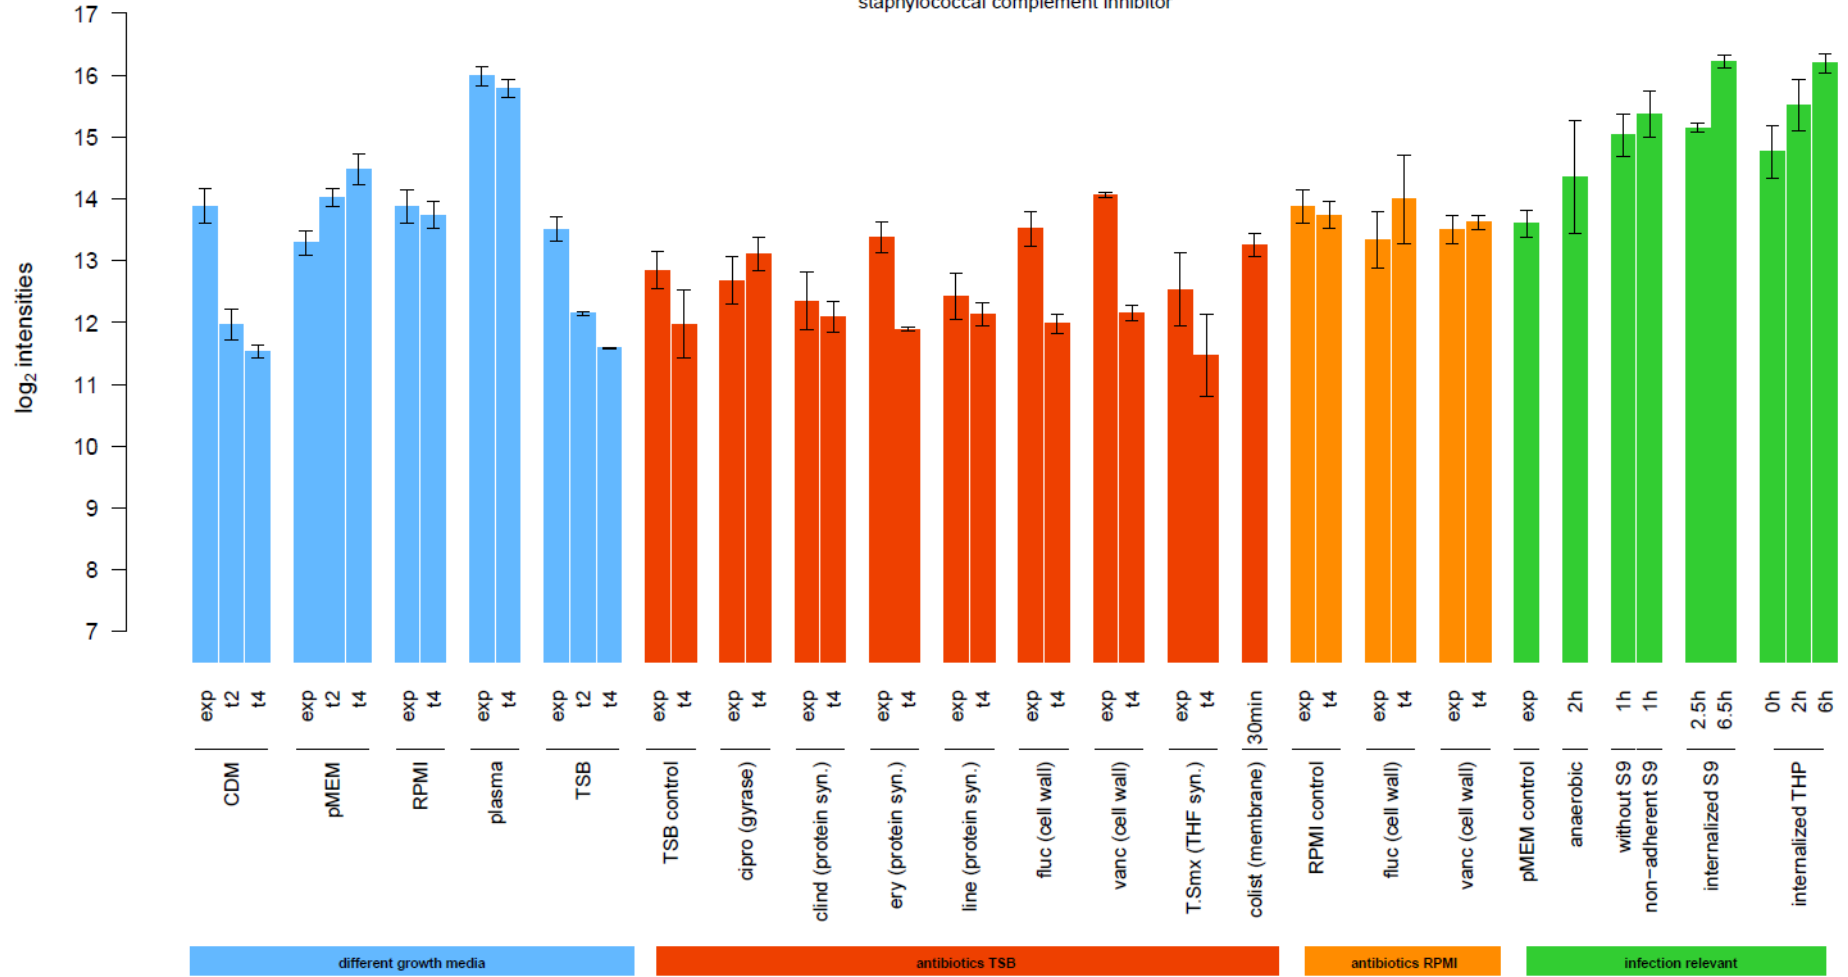

# SAOUHSC\_02706 - sbi

immunoglobulin G-binding protein

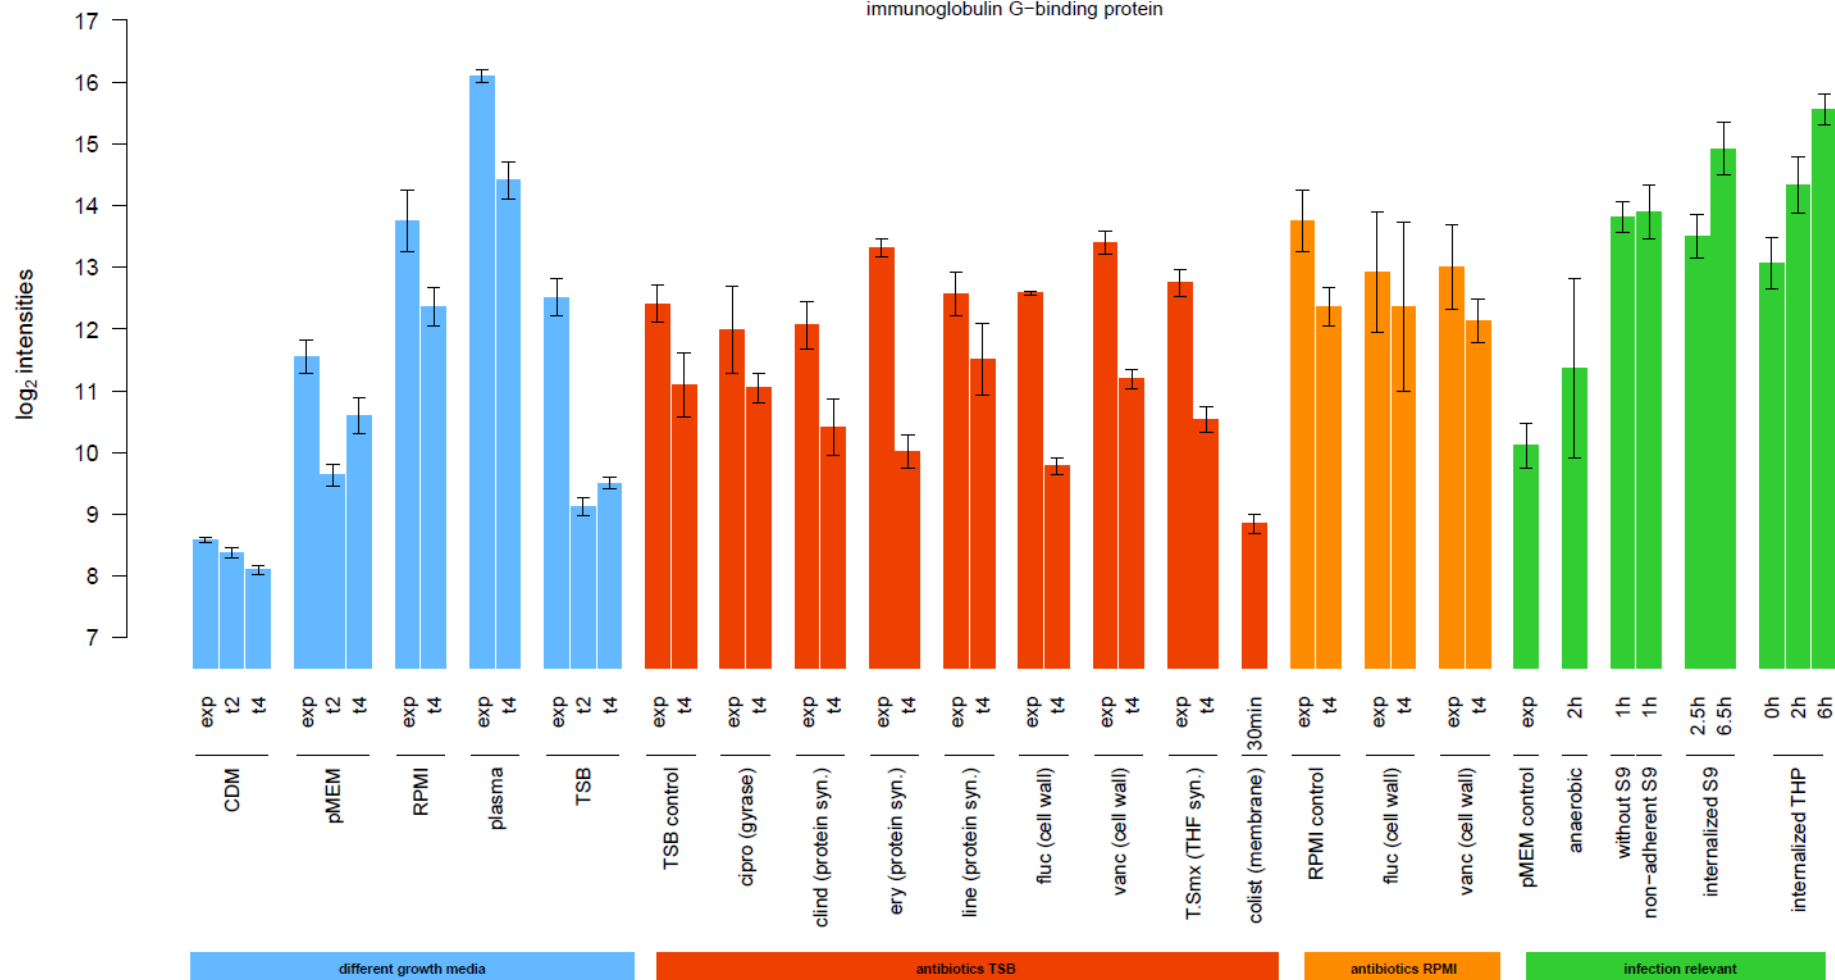

SAOUHSC\_02171 - sak  
staphylokinase precursor

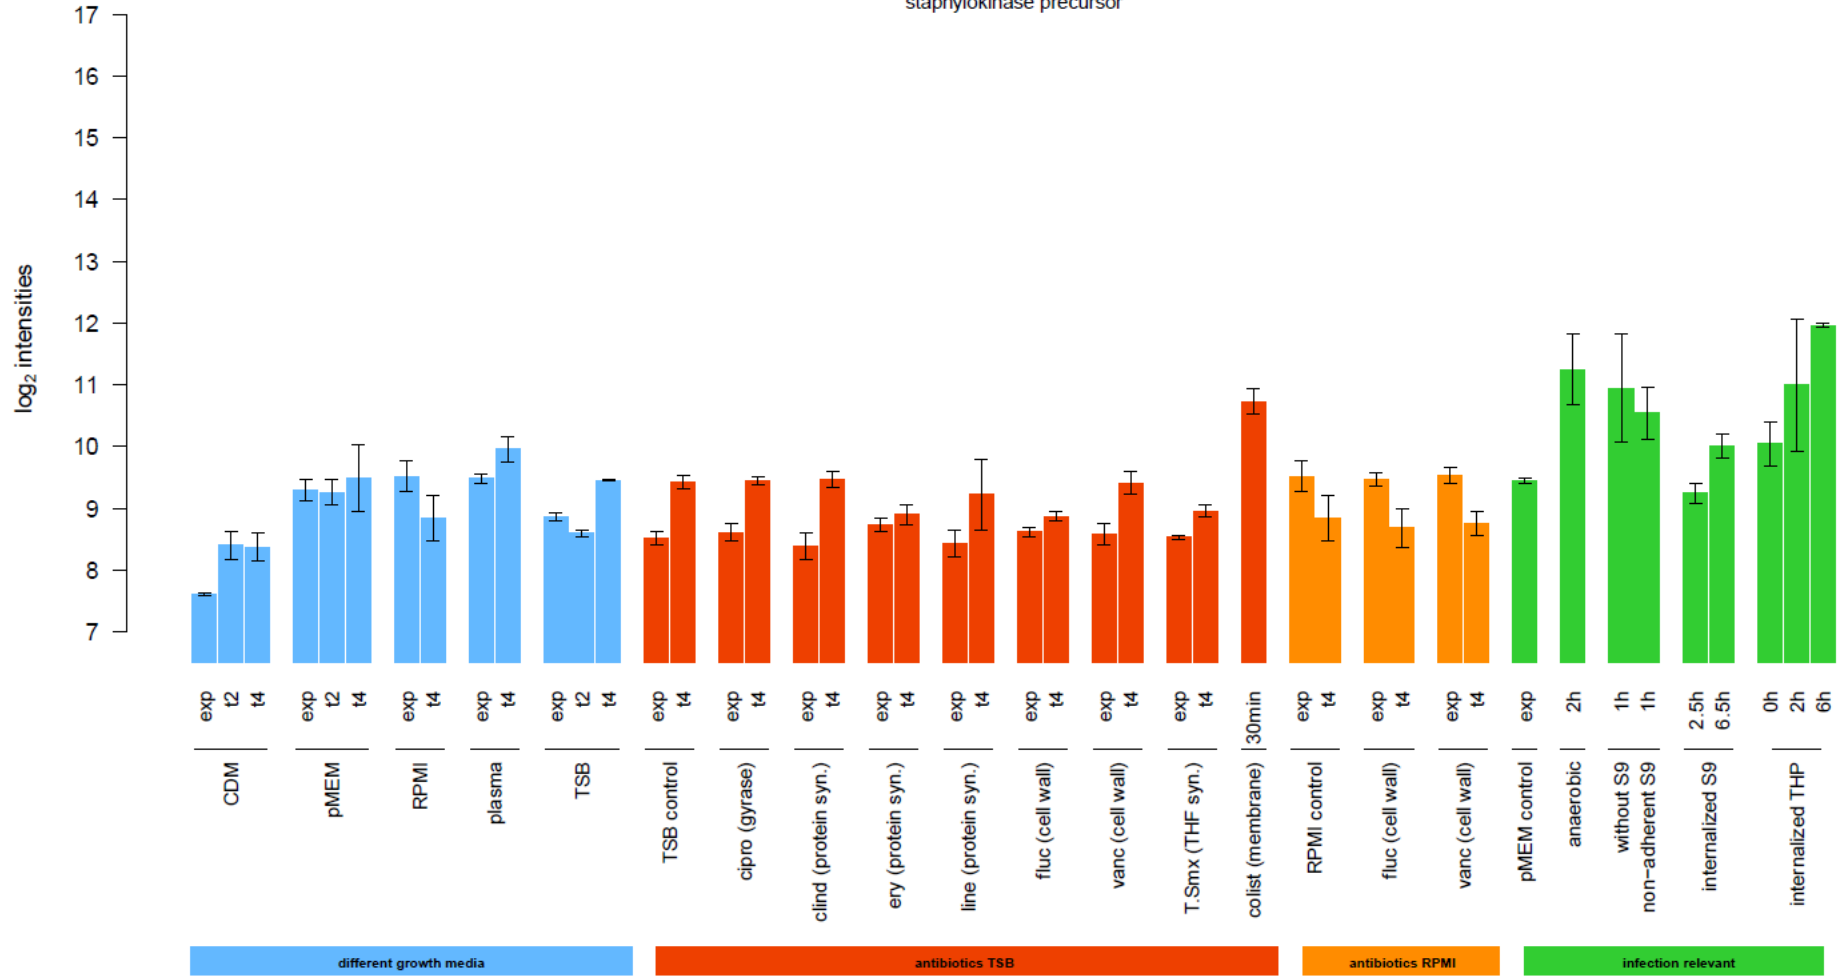

# SAOUHSC\_00114 - capA

Polysaccharide export protein, MPA

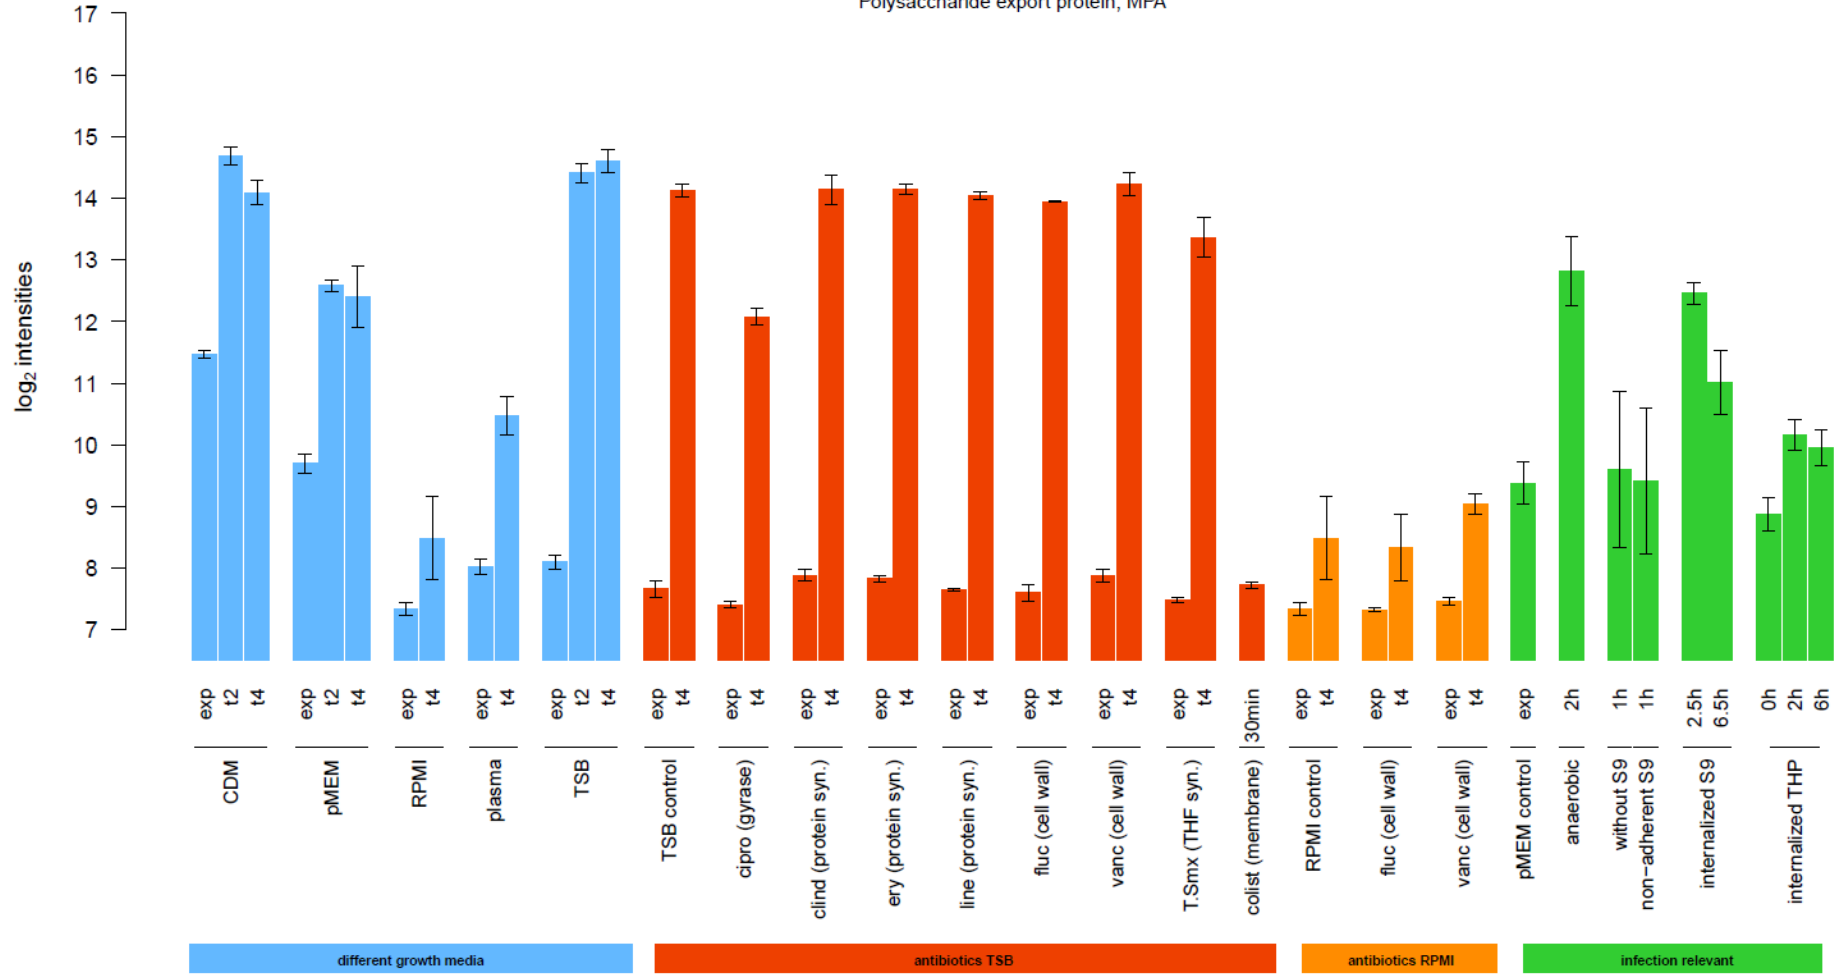

**SAOUHSC\_01079 - isdB**  
iron-regulated cell wall-anchored protein

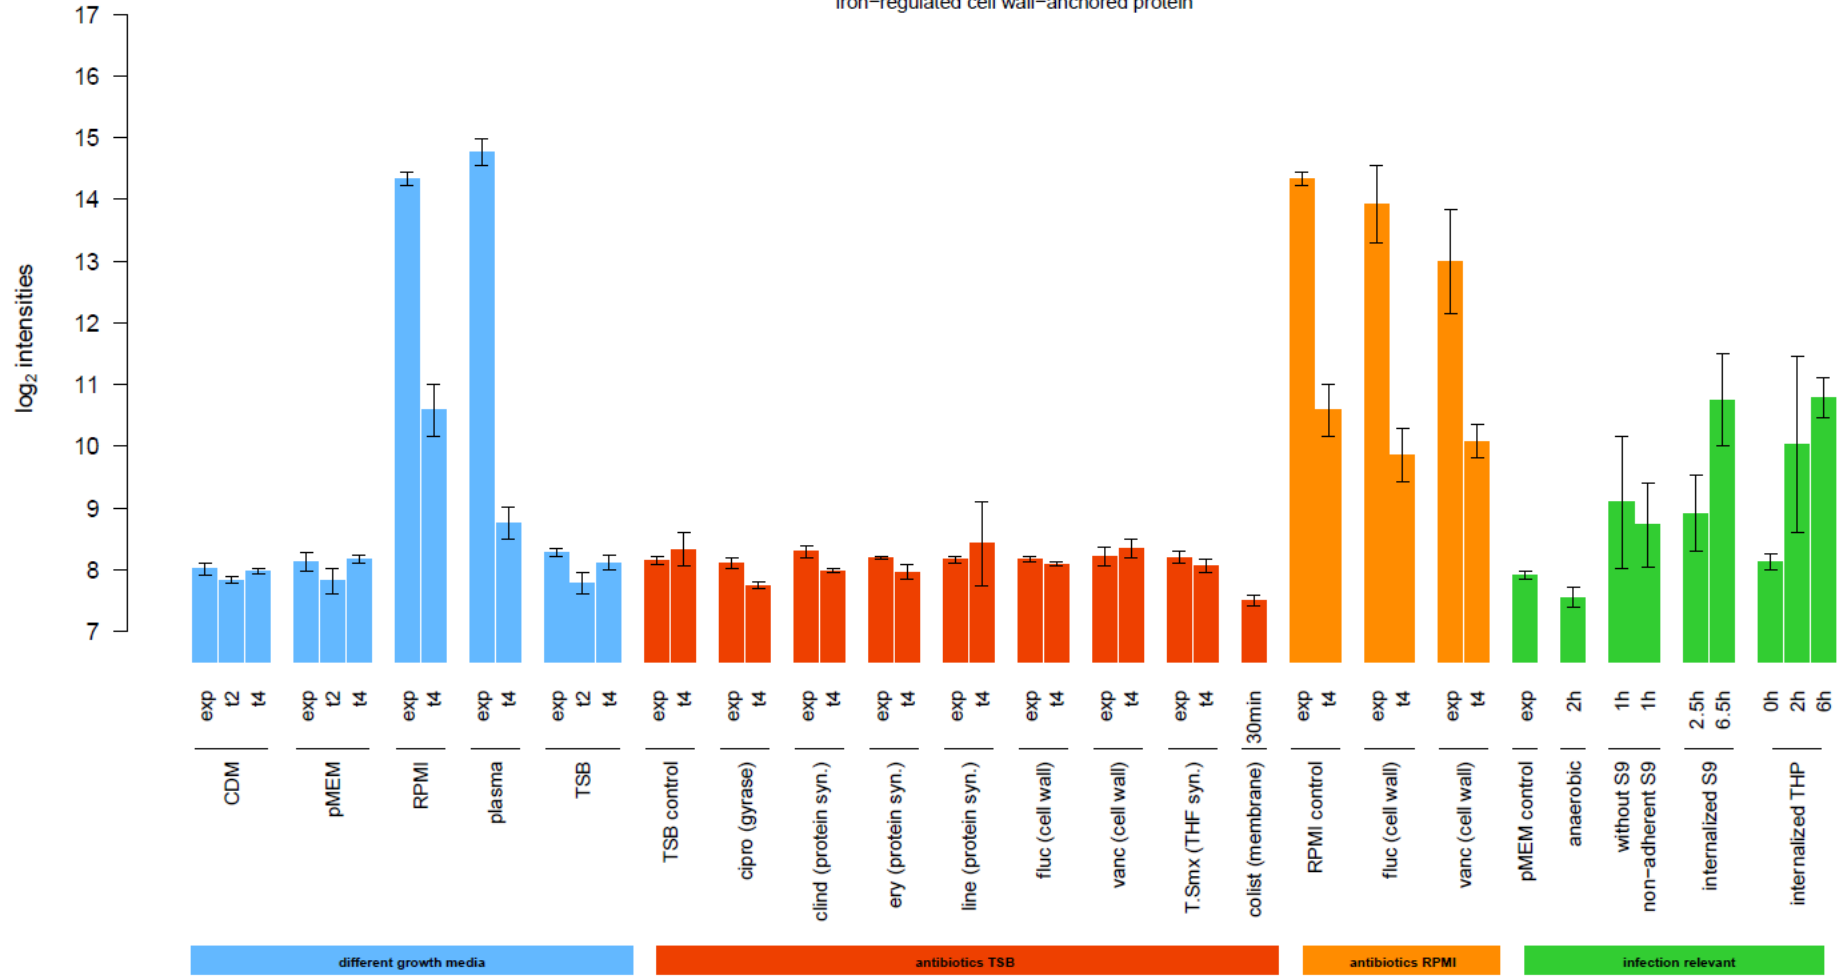

SAOUHSC\_01843 - sasI  
haptoglobin-binding heme uptake protein HarA

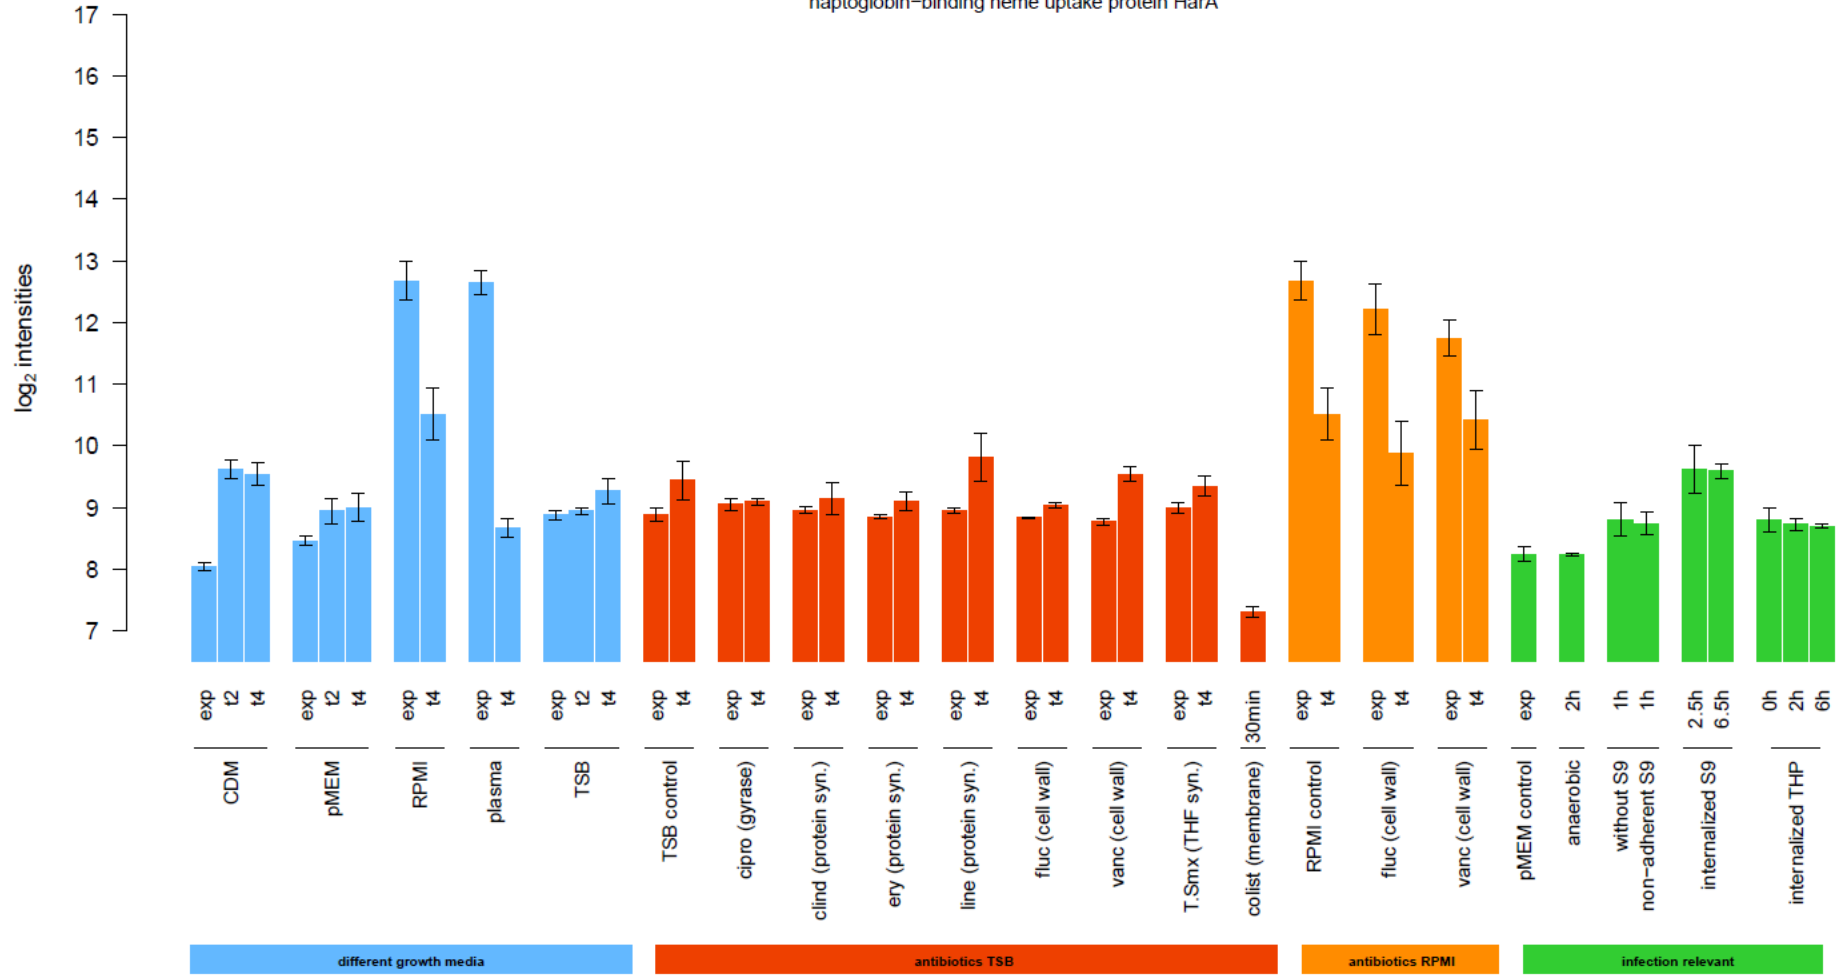



reference genes

# SAOUHSC\_01319 - thrA

aspartate kinase

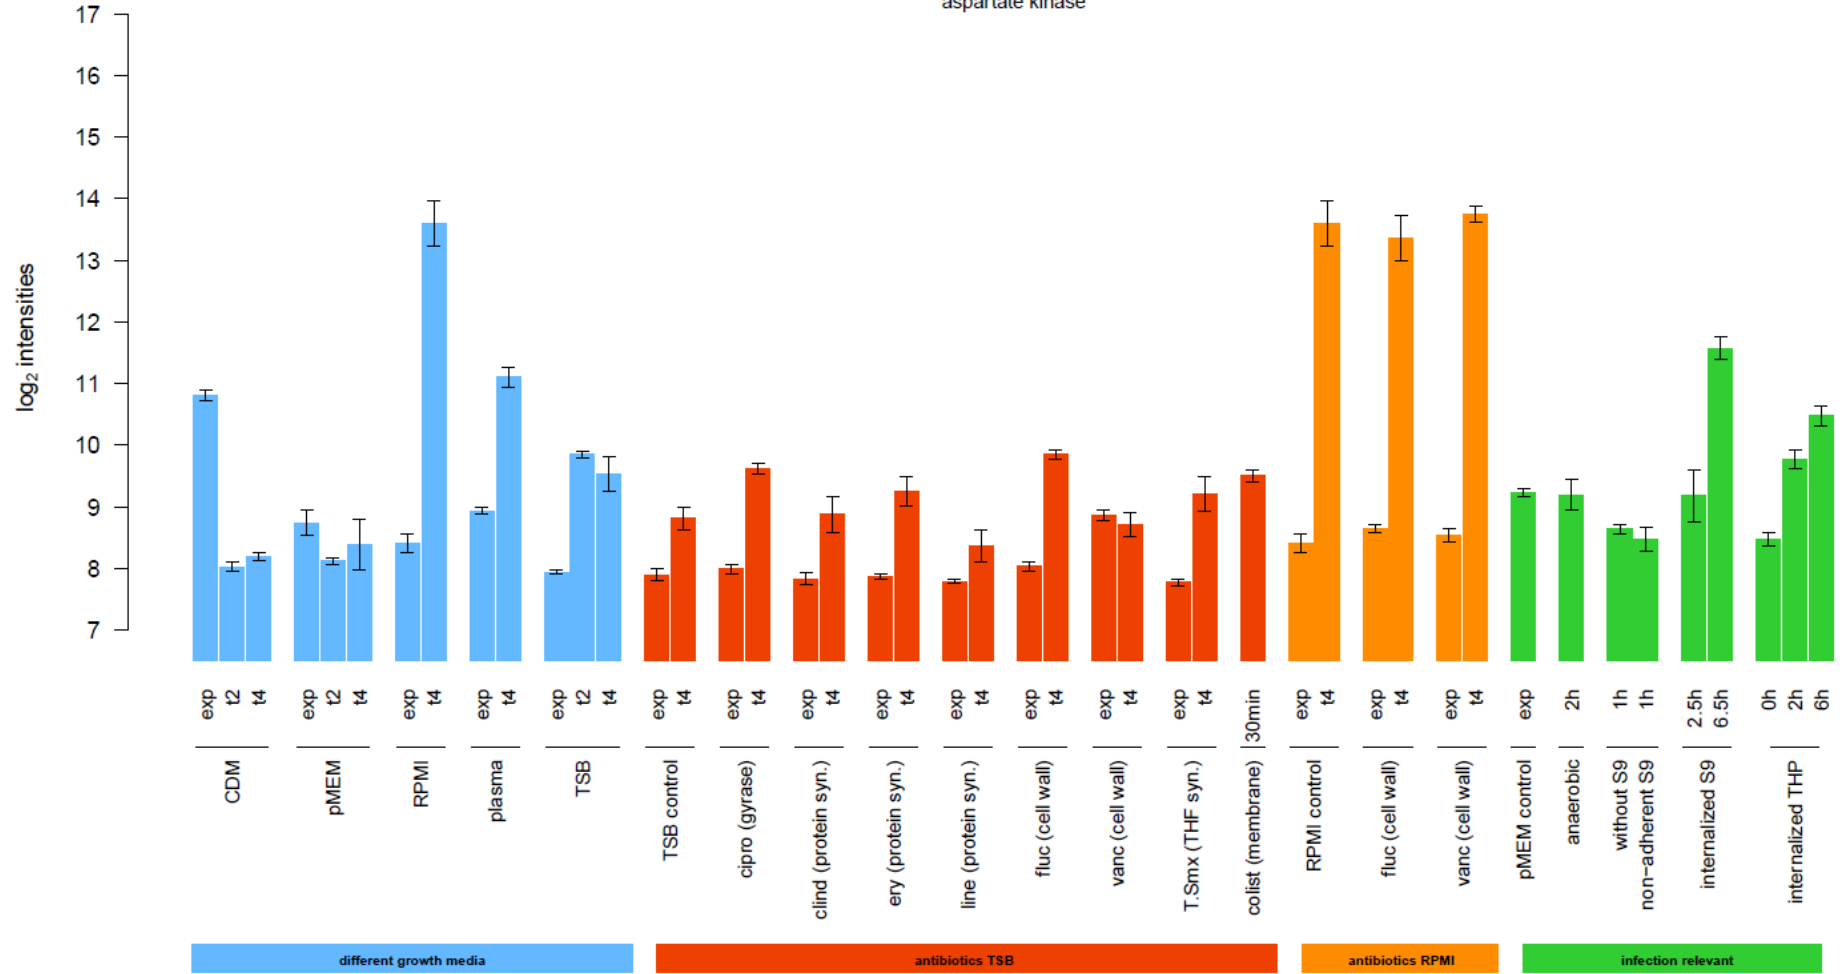

SAOUHSC\_01394 - lysC  
aspartate kinase, monofunctional class

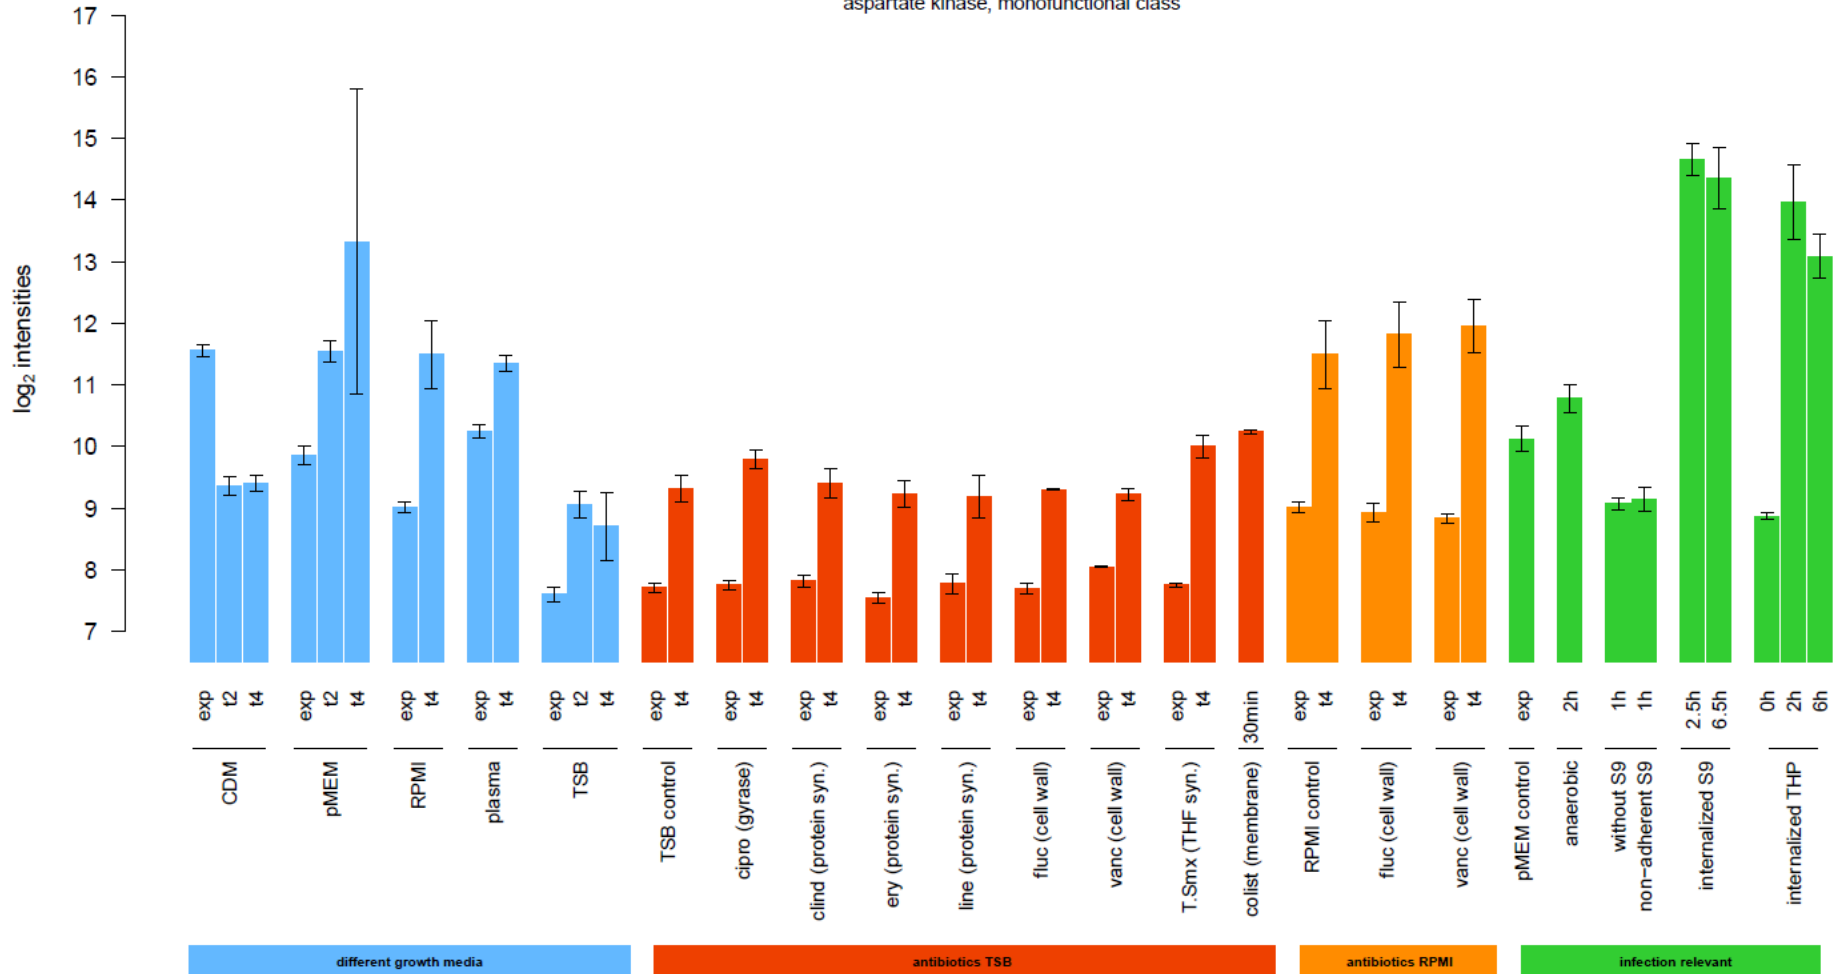

# SAOUHSC\_02281 - ilvD

dihydroxy-acid dehydratase

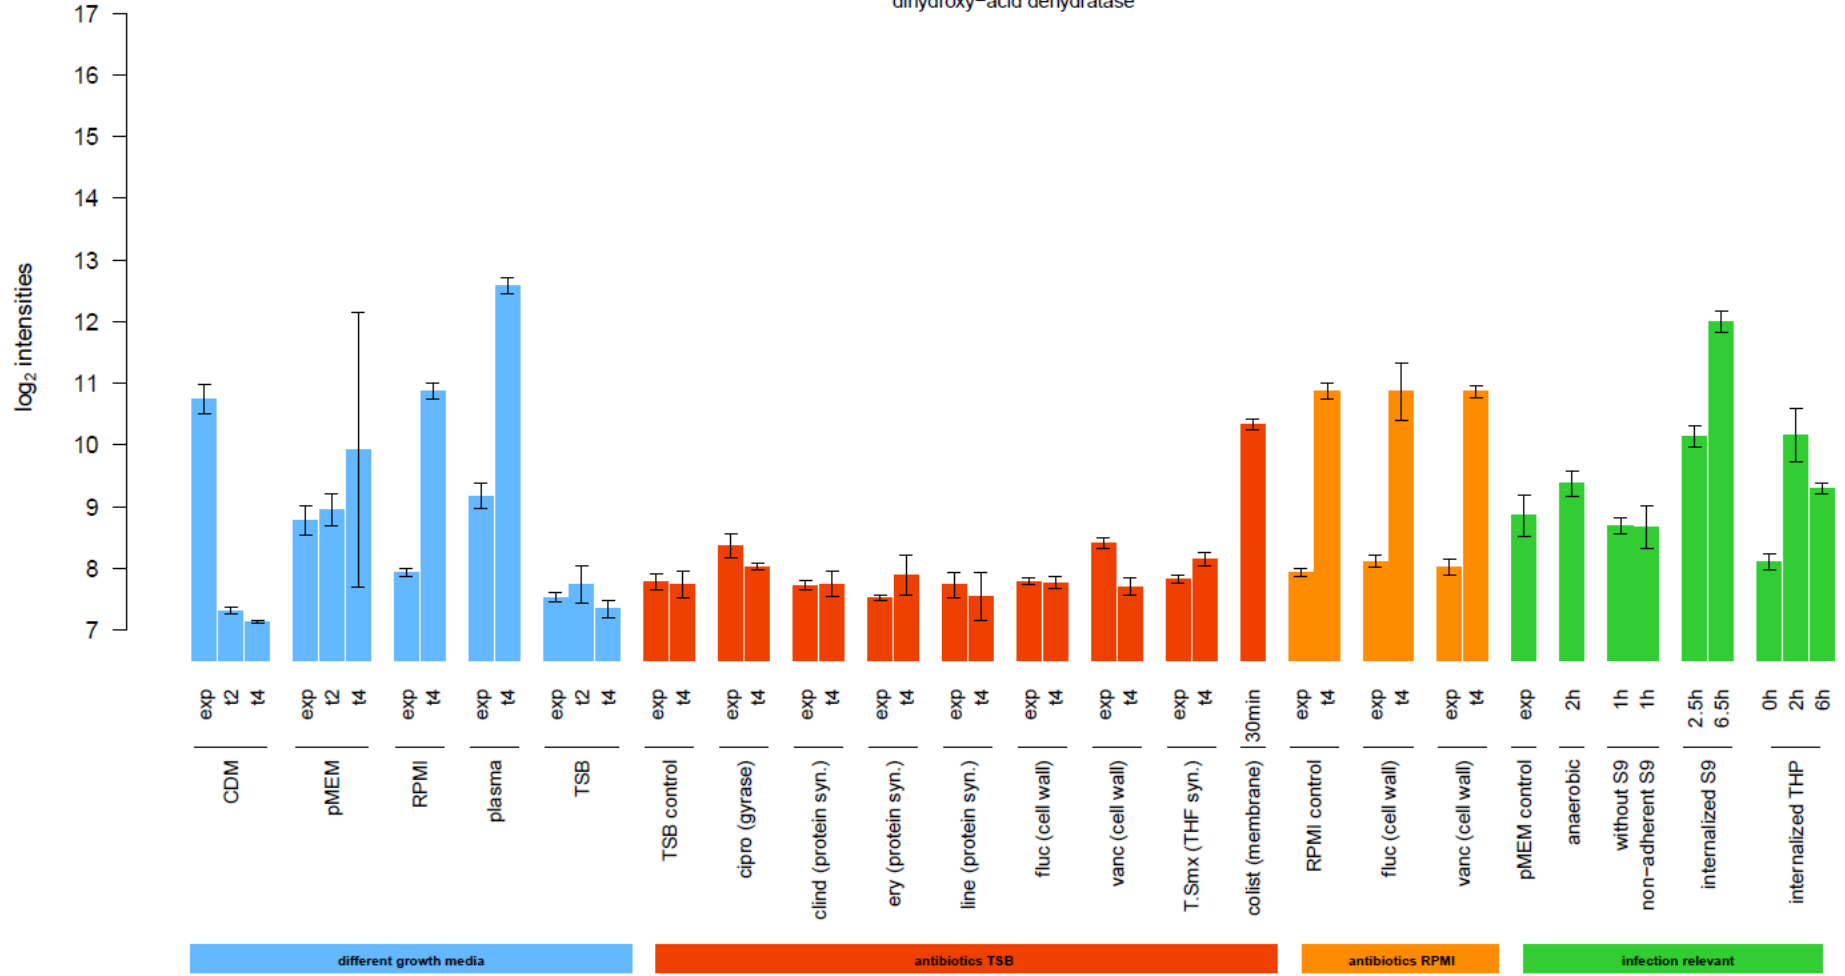

SAOUHSC\_01833 - serA  
D-3-phosphoglycerate dehydrogenase

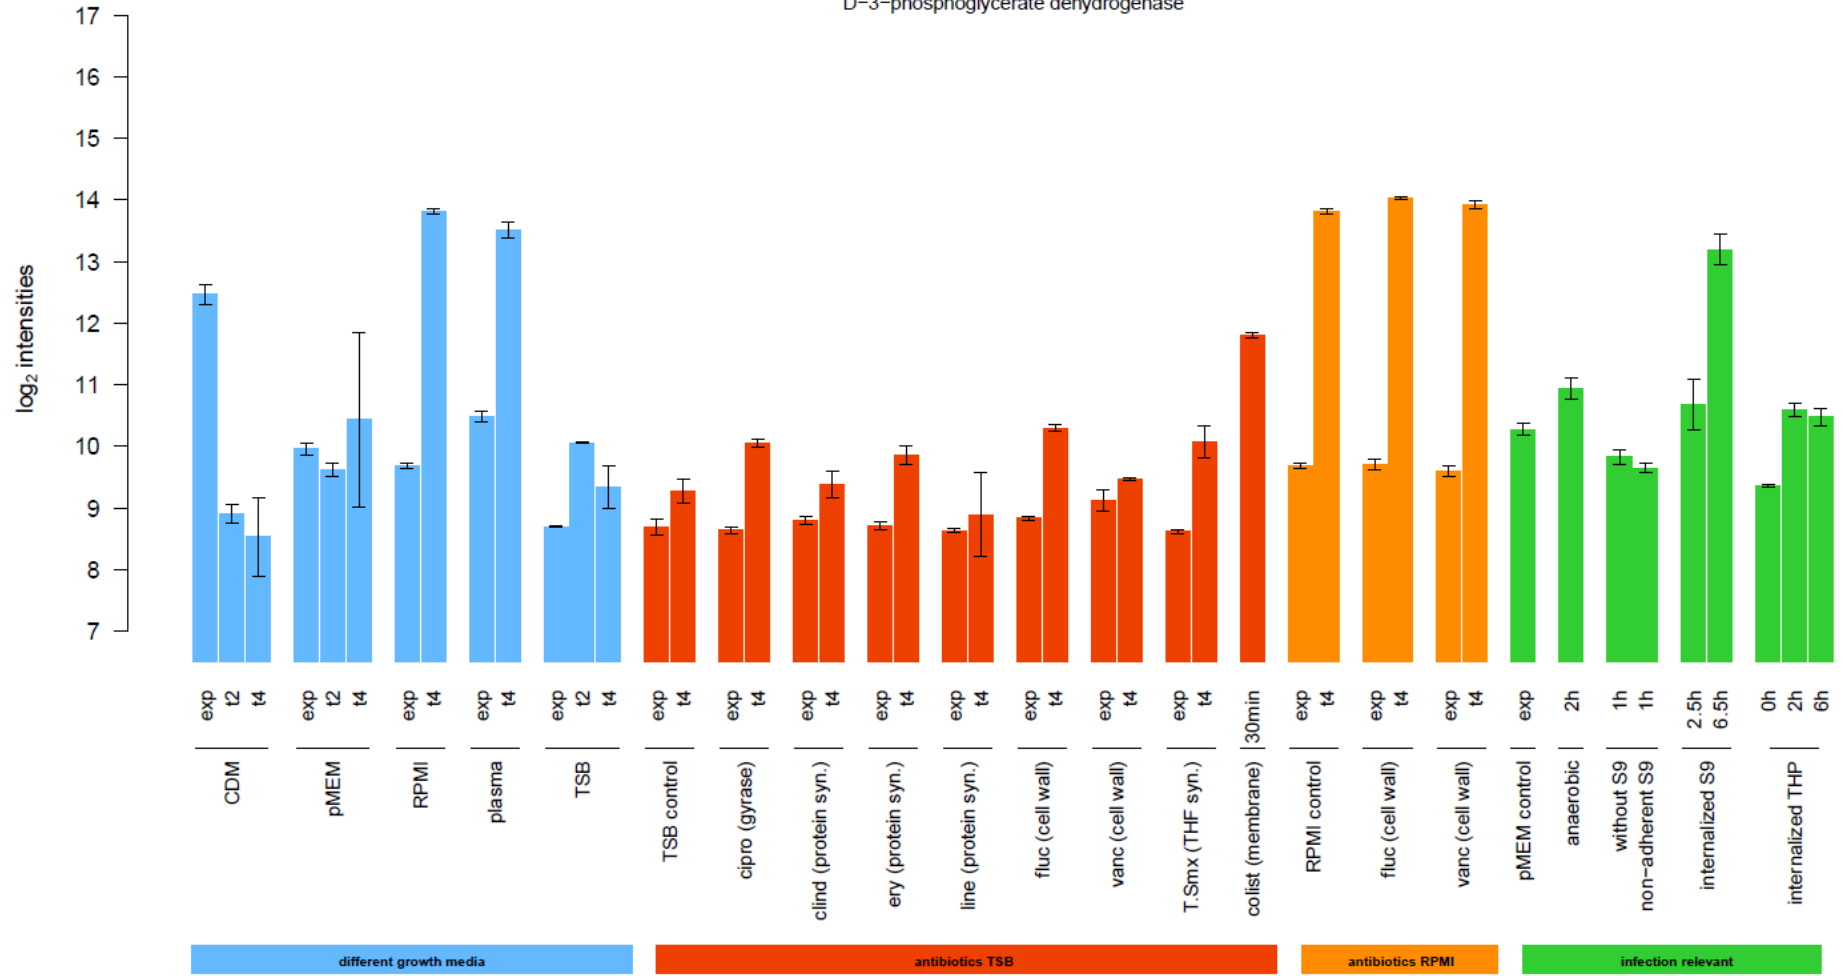

# SAOUHSC\_00923 - SAOUHSC\_00923

oligopeptide ABC transporter, permease protein

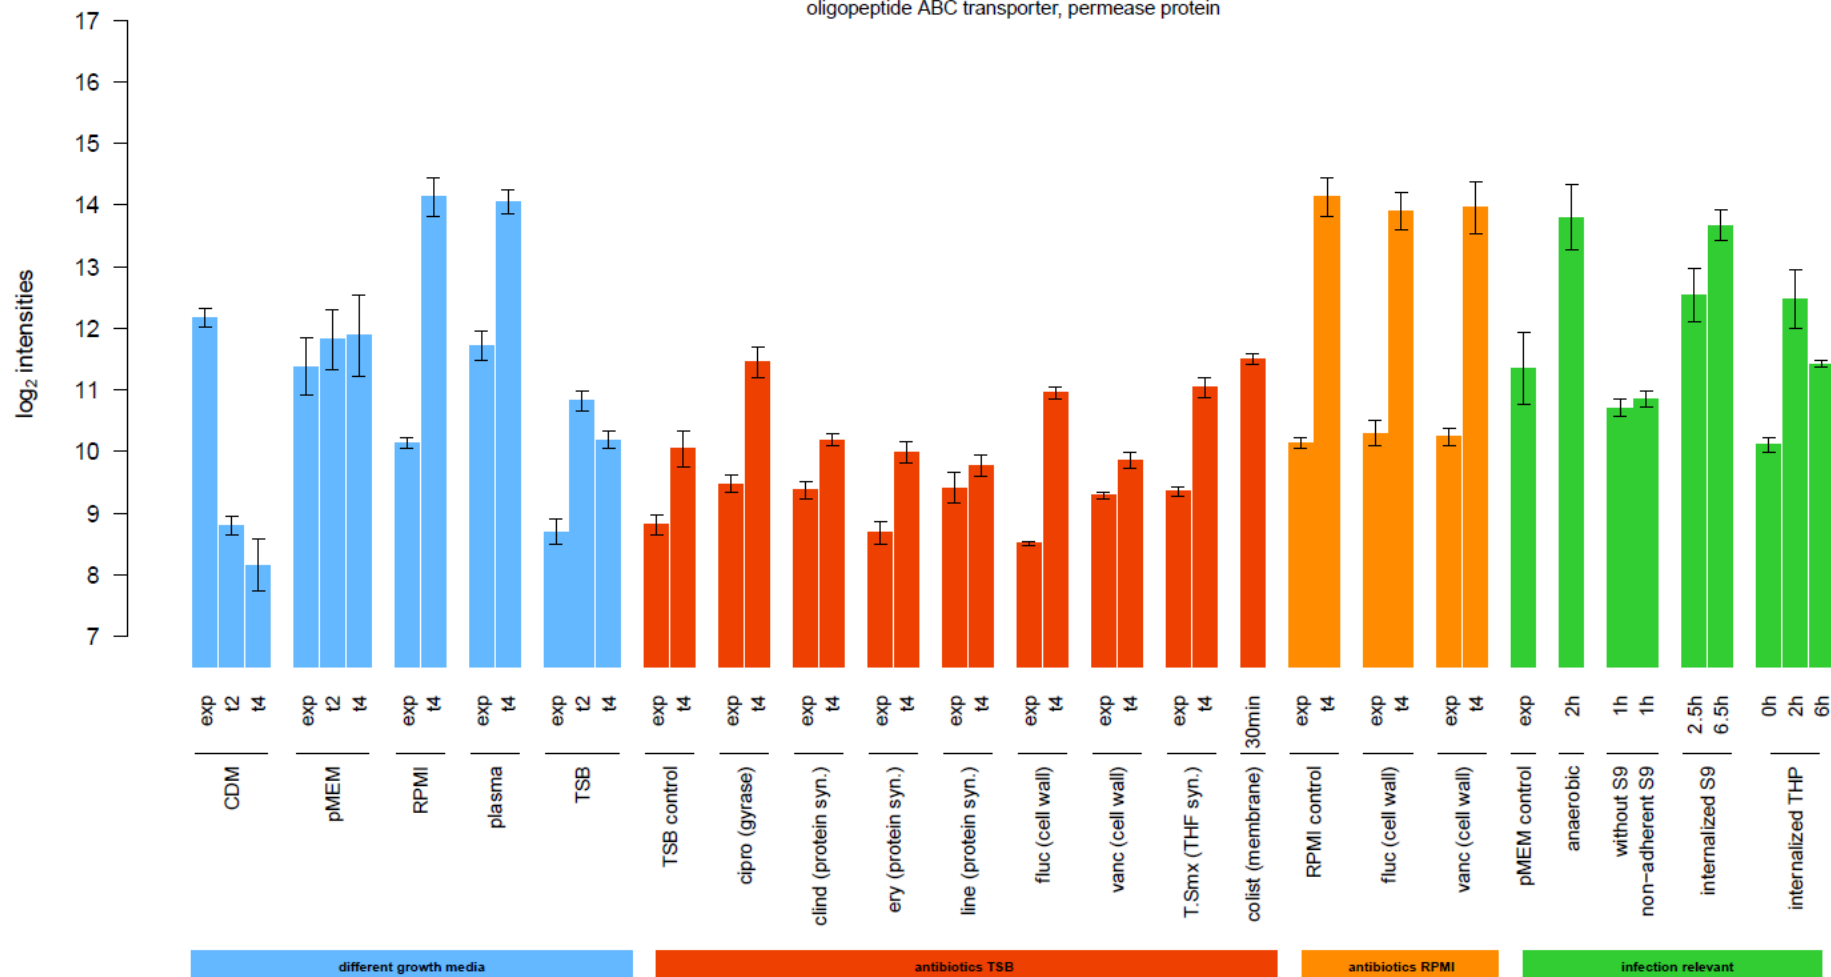

**SAOUHSC\_00113 - adhE**  
iron-containing alcohol dehydrogenase

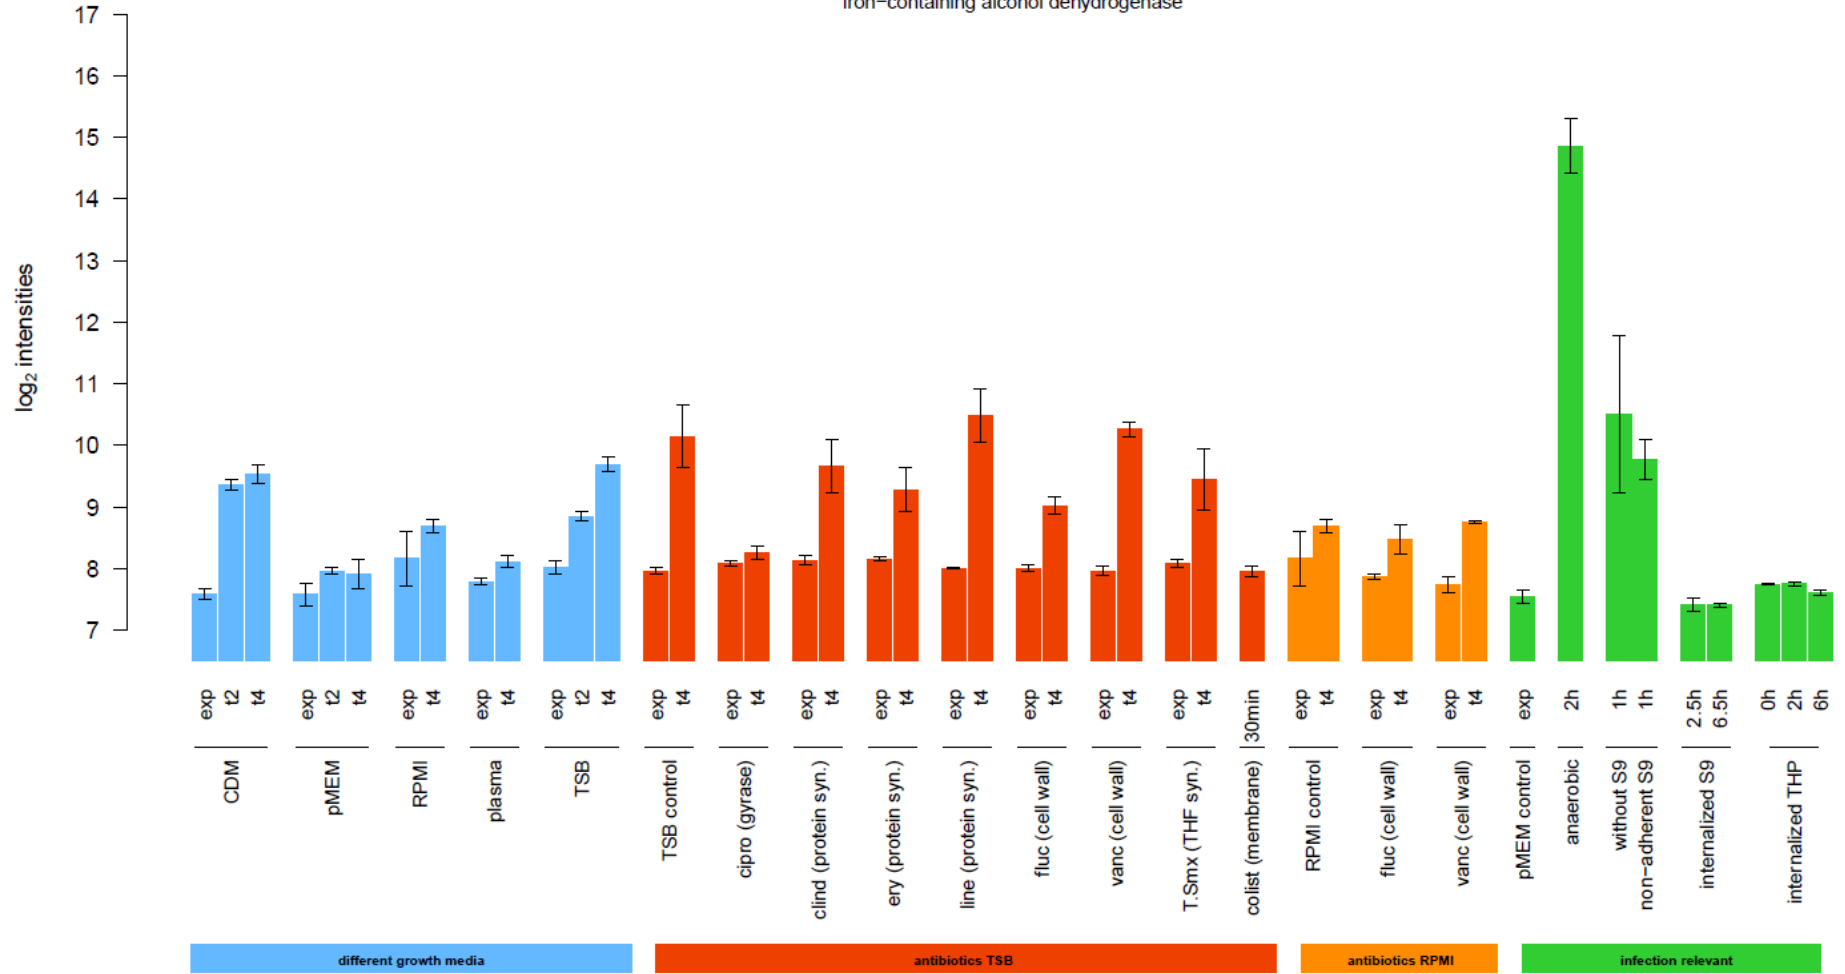

# SAOUHSC\_00608 - adh1

oxidoreductase, zinc-binding dehydrogenase family protein

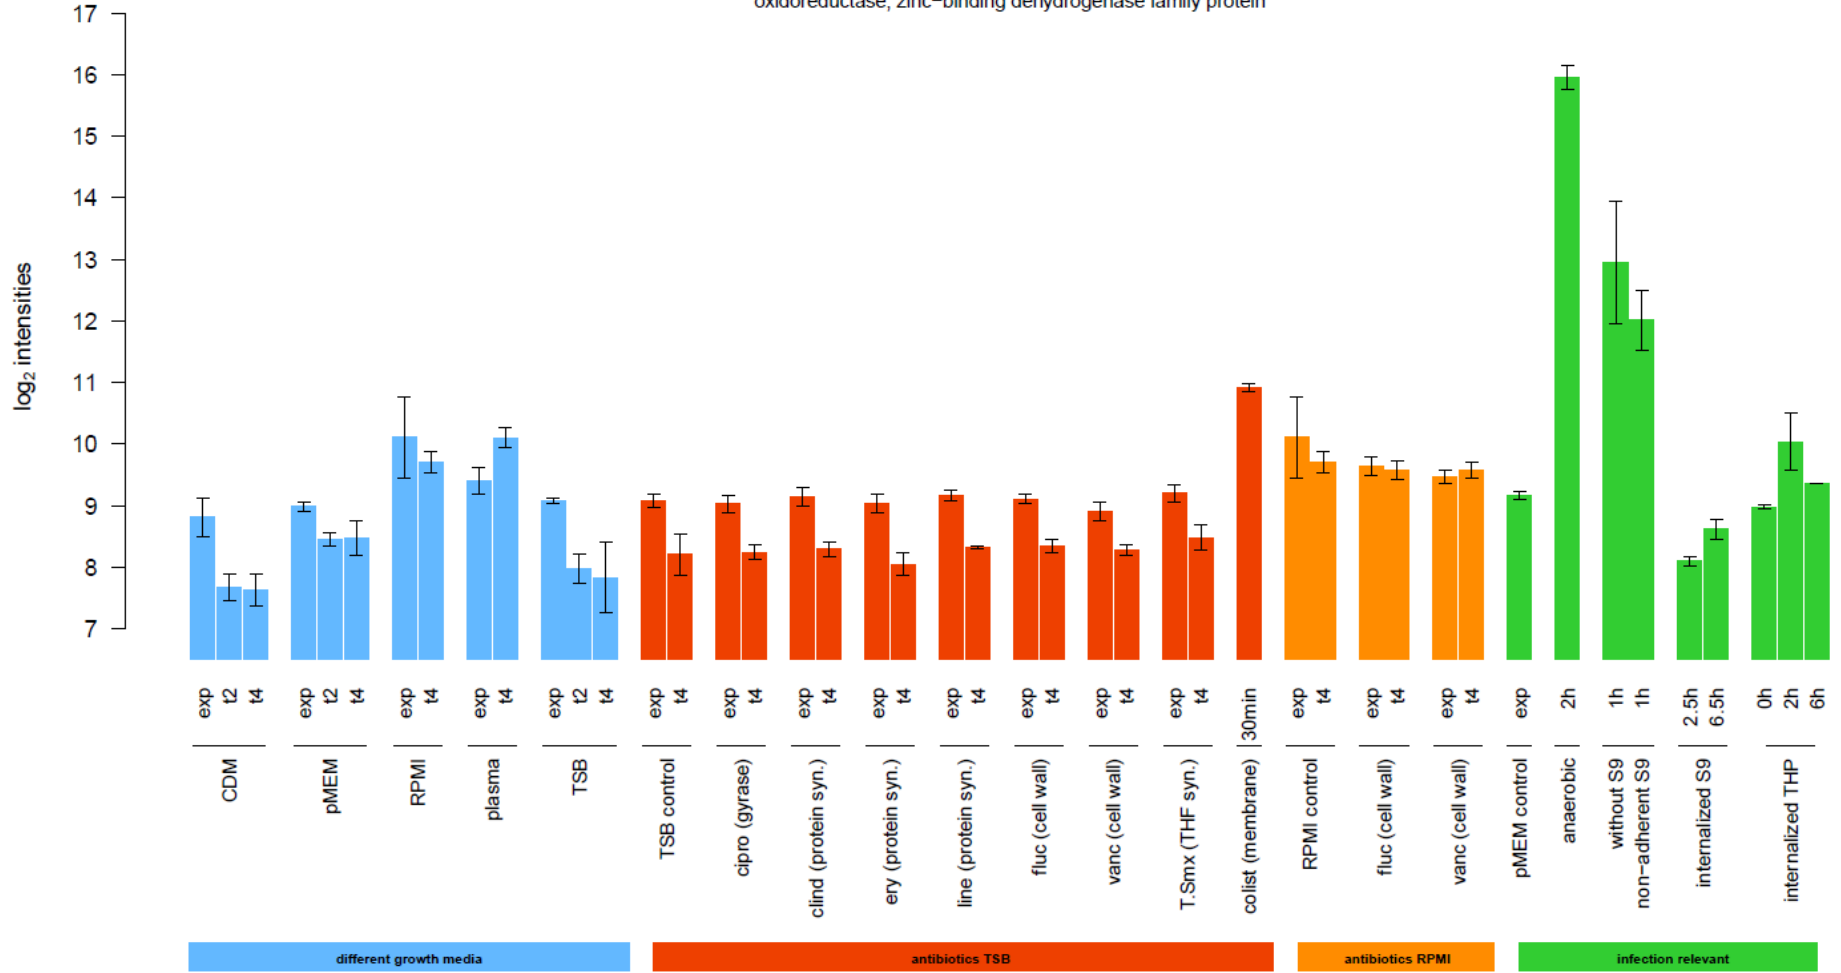



SAOUHSC\_00187 - pflB  
formate acetyltransferase

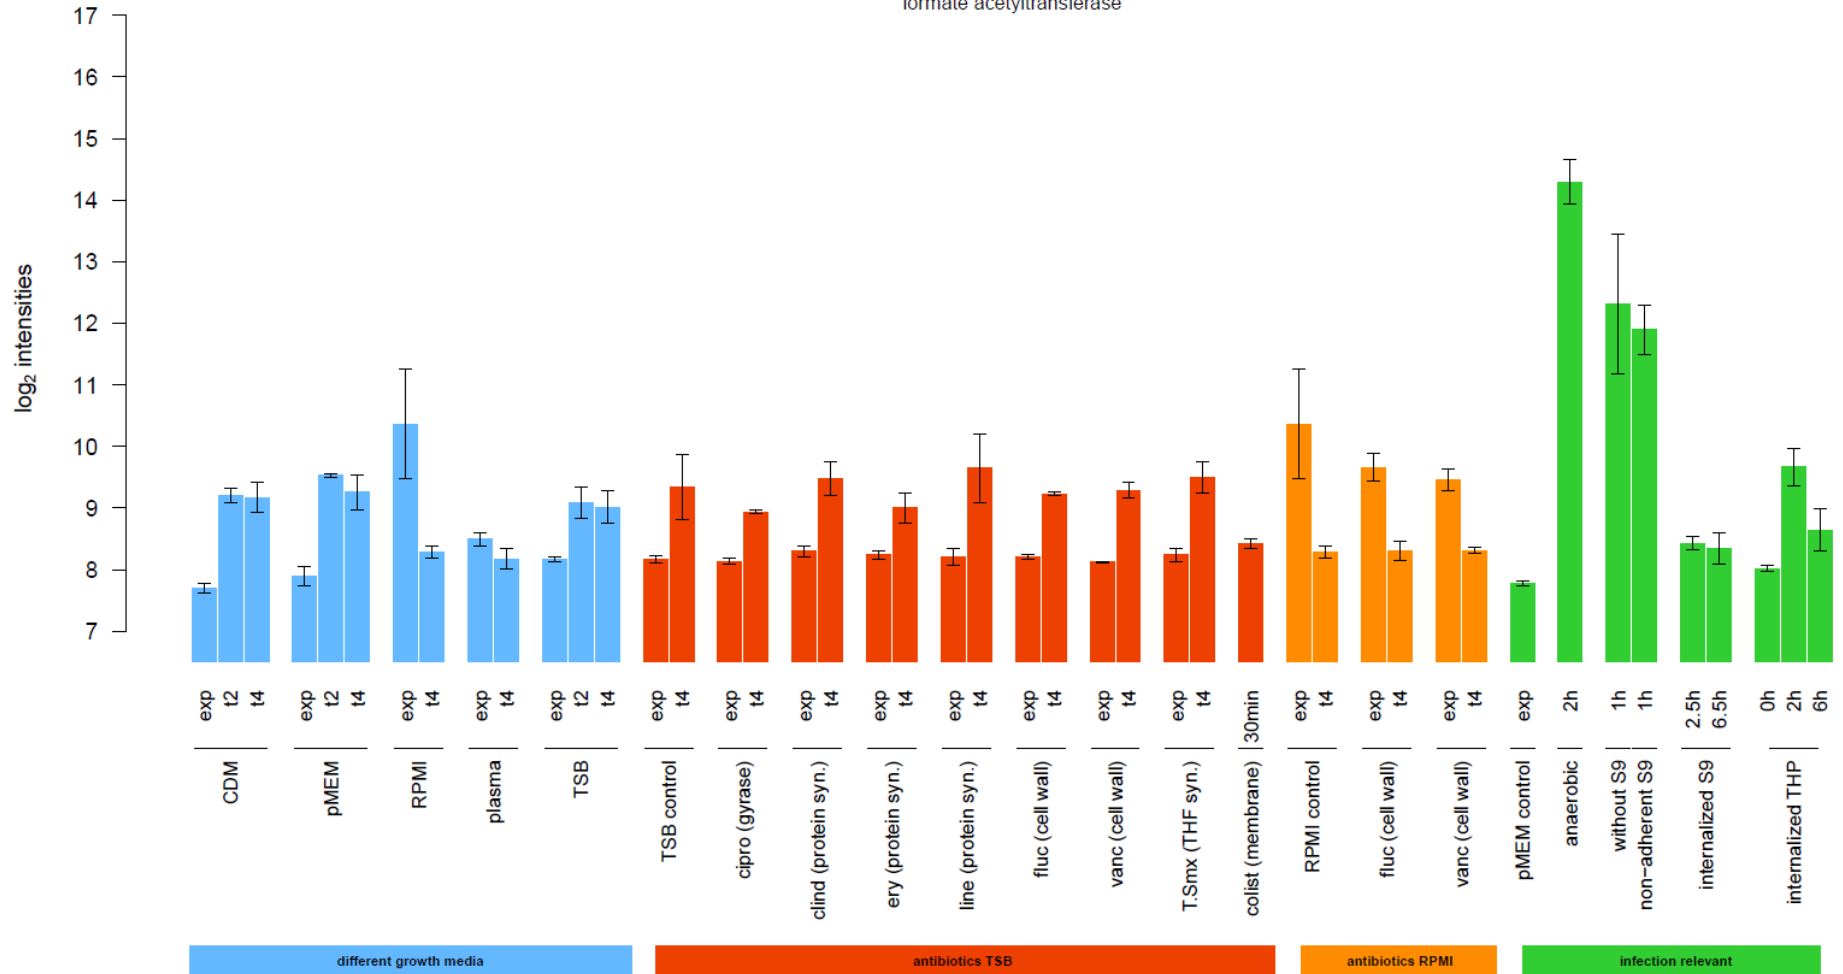

# SAOUHSC\_00206 - IctE

L-lactate dehydrogenase

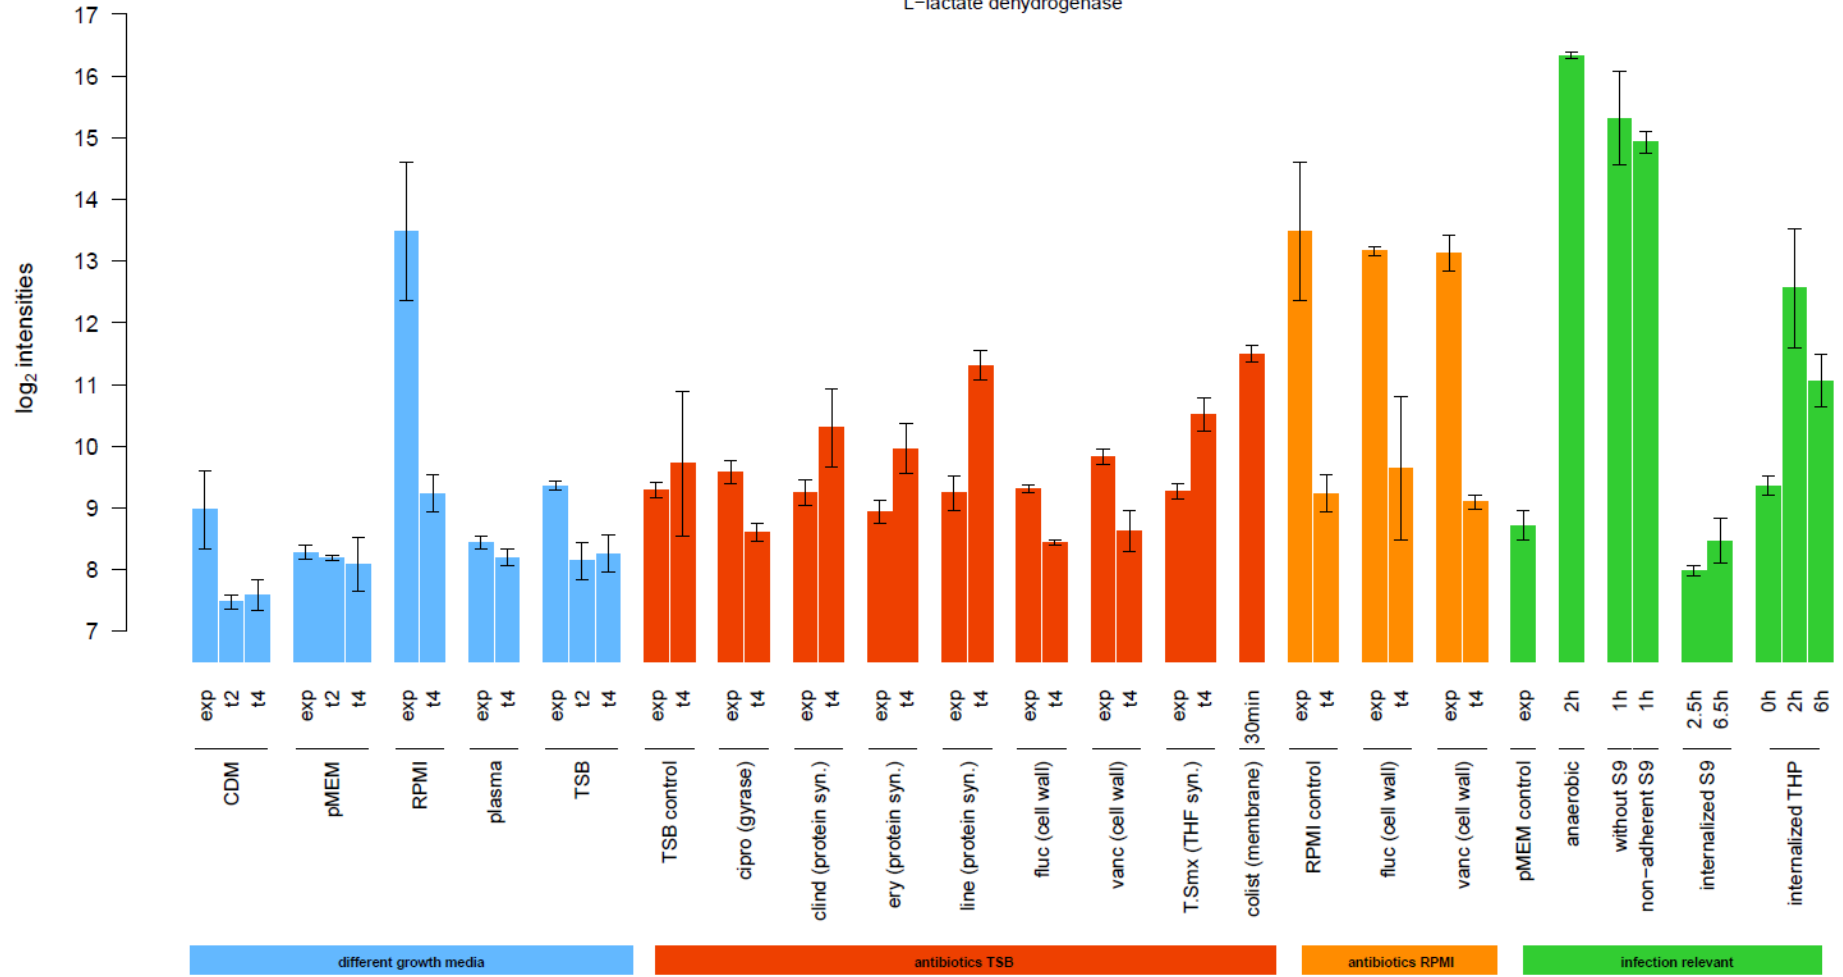

# SAOUHSC\_01081 - isdA

cell surface protein

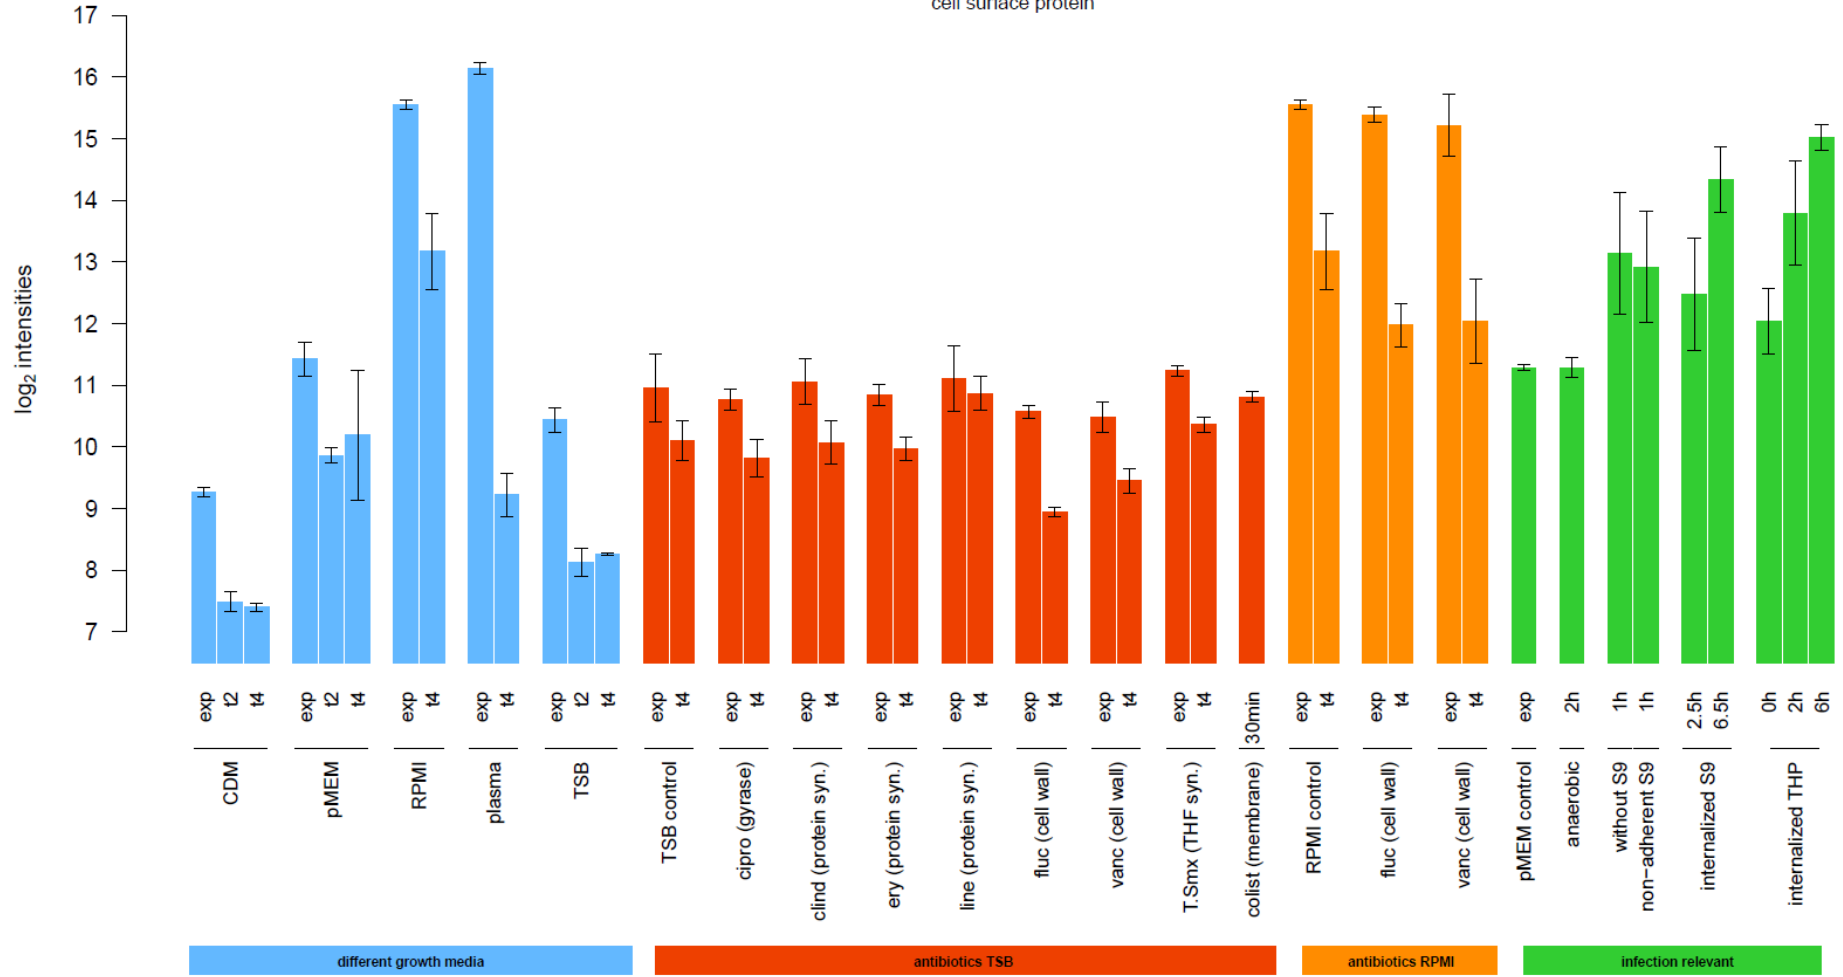

# SAOUHSC\_01082 - isdC

iron-regulated cell surface protein

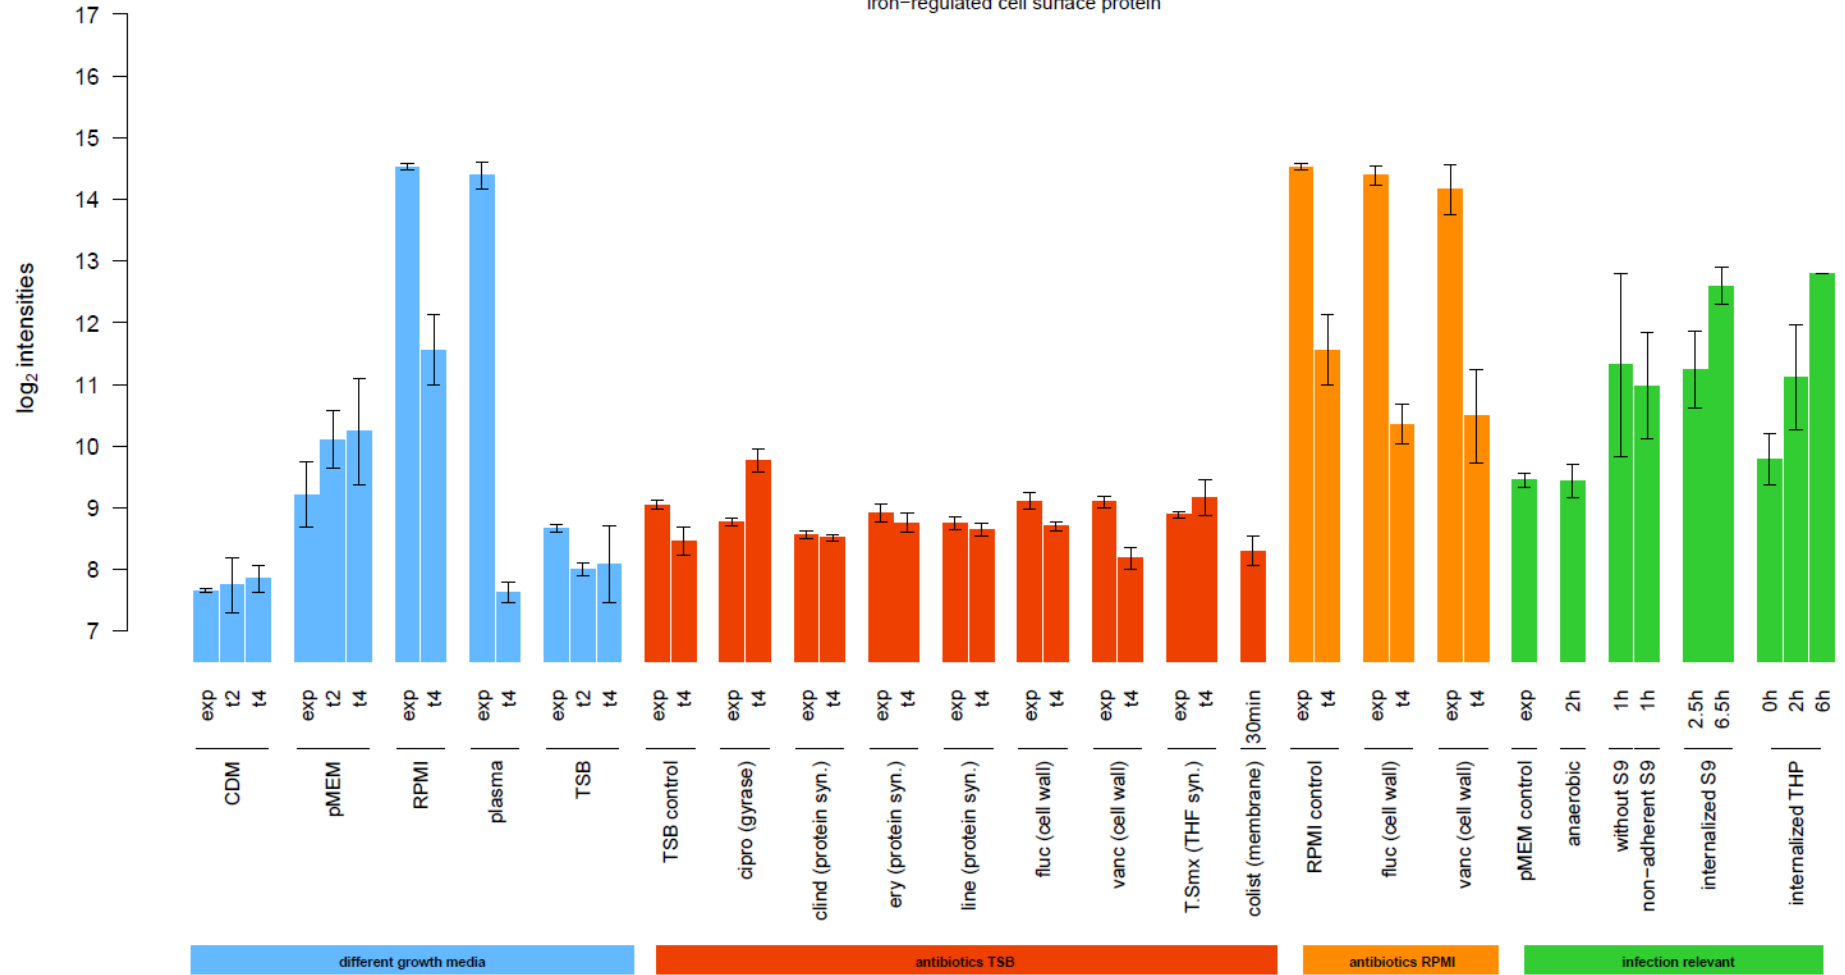

# SAOUHSC\_00074 - sirA

iron (III) dicitrate transport system (iron (III)-binding protein)

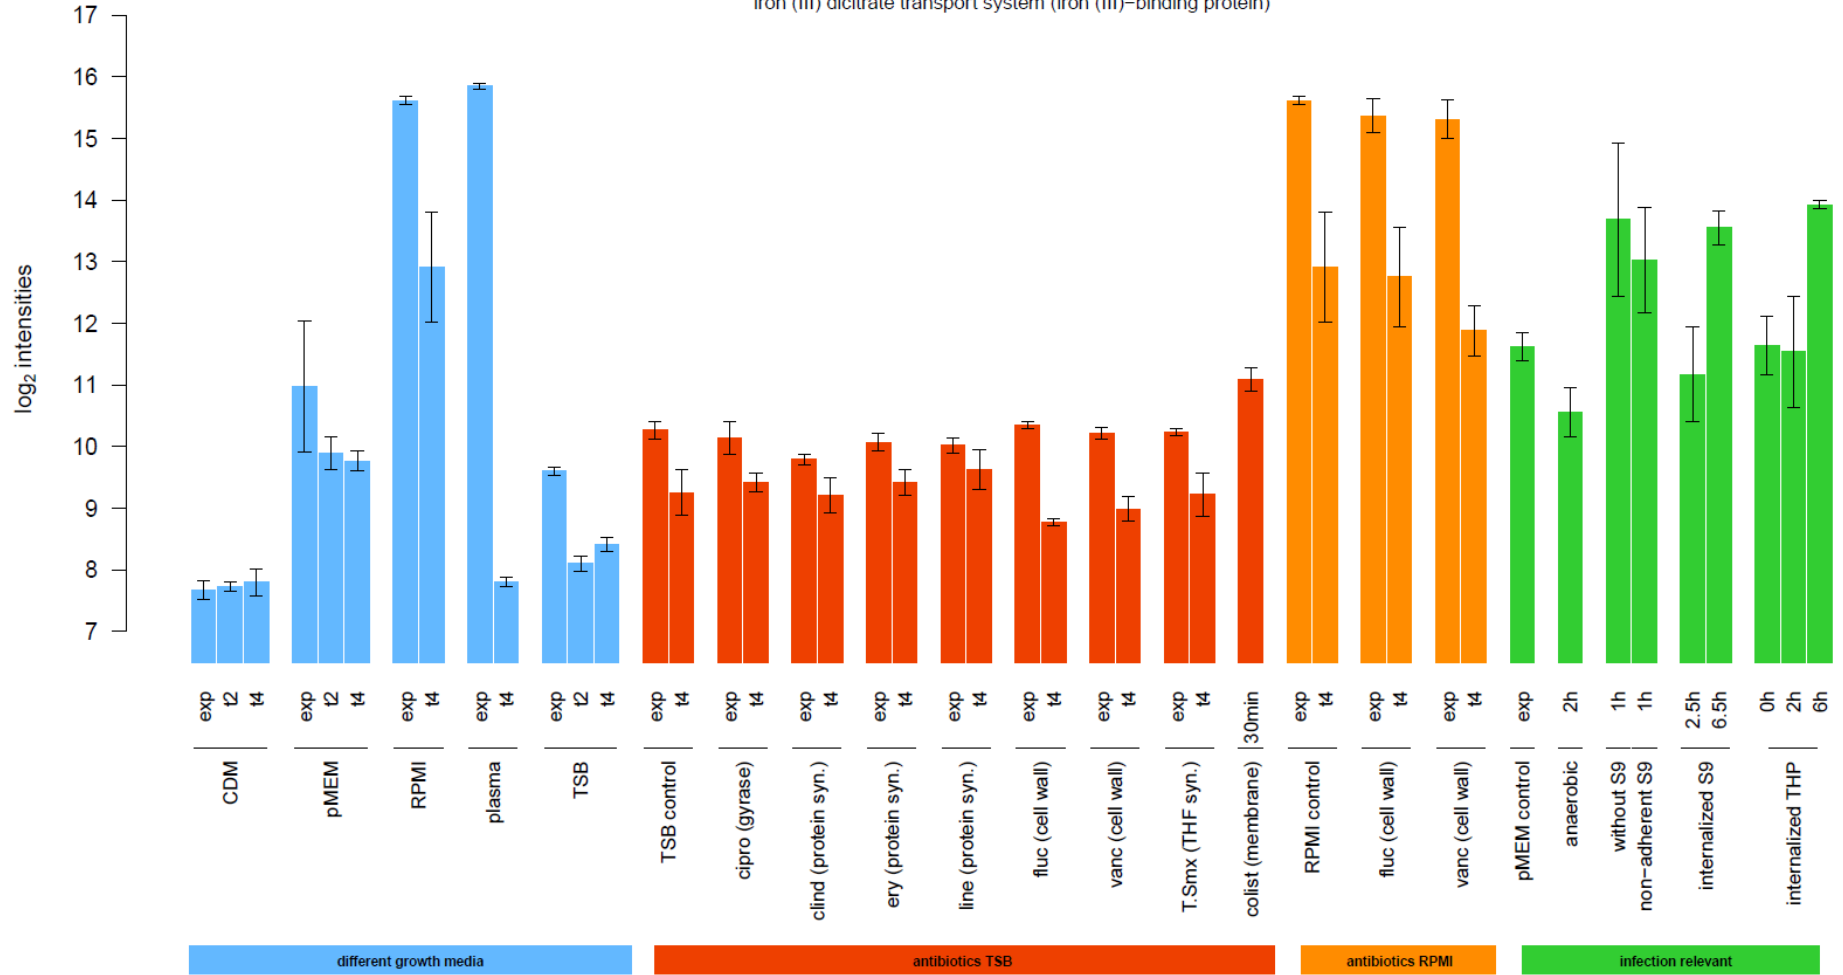

# SAOUHSC\_00075 - sbnA

pyridoxal-5'-phosphate-dependent protein subunitbeta

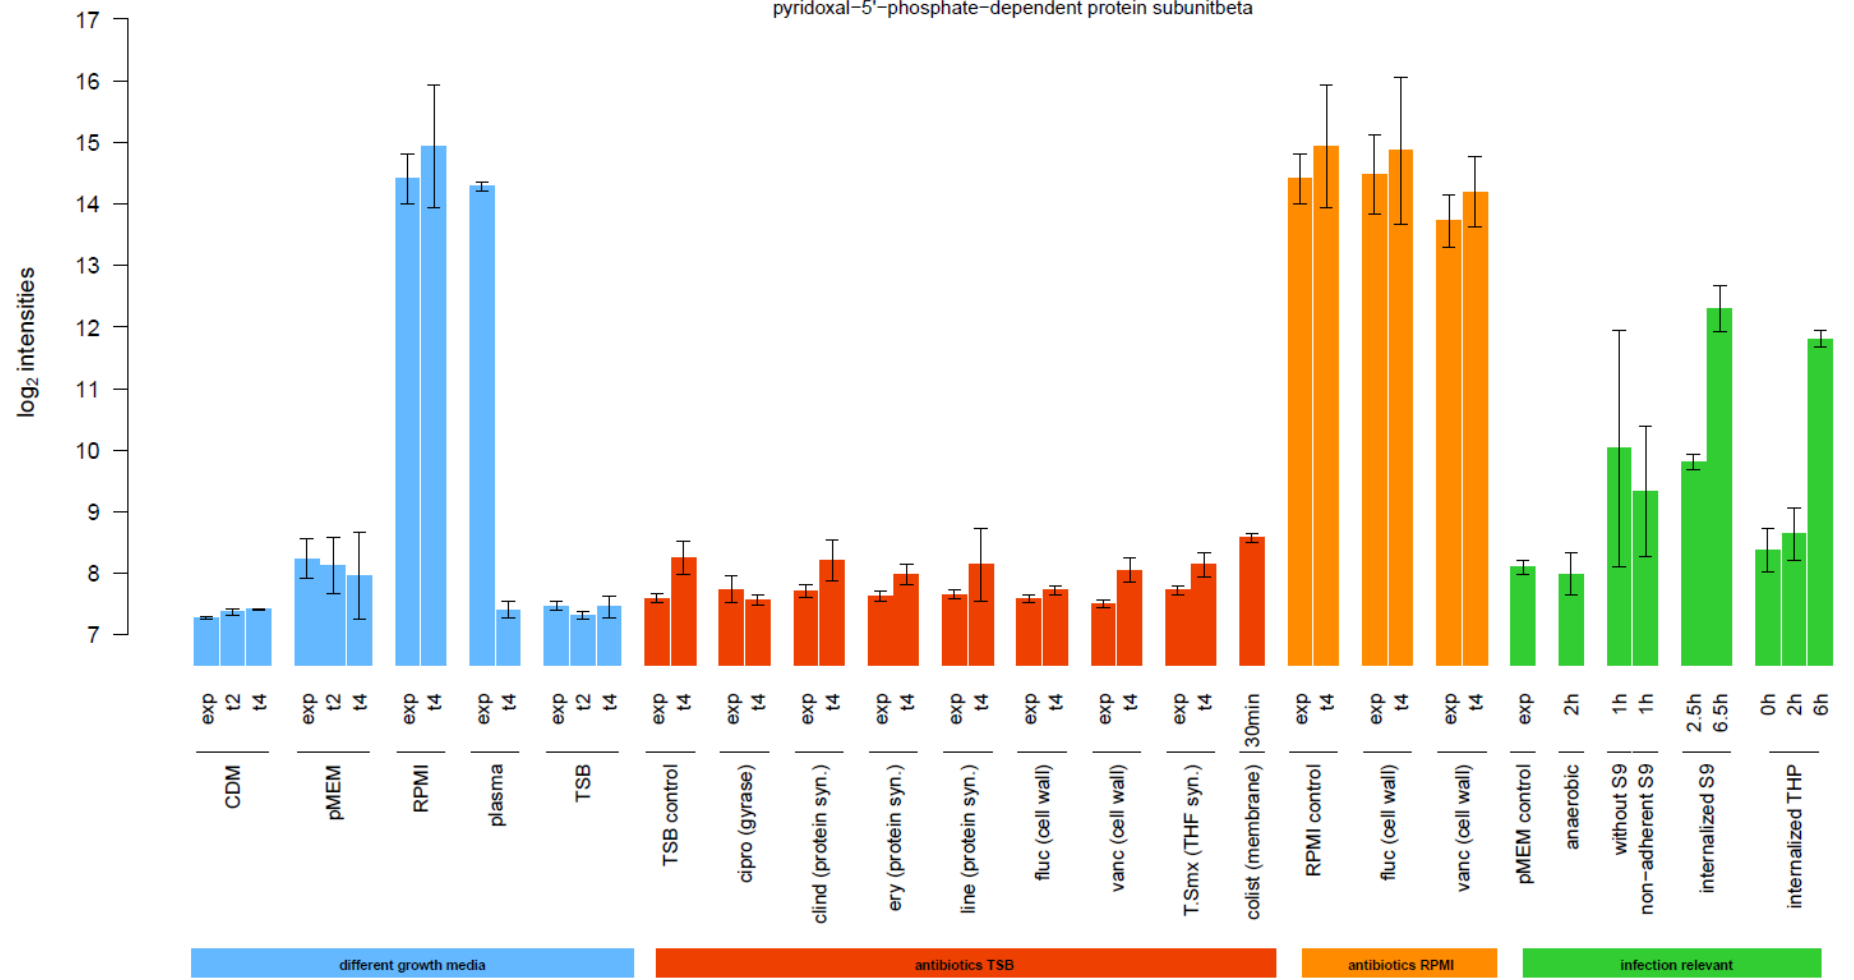

Supplement: pgen.1005962.s002.pdf [file pgen.1005962.s002.pdf]
