# Supplementary material for: Staphylococcus aureus Transcriptome Architecture: From Laboratory to Infection-Mimicking Conditions
Source: PLoS Genet. 2016 Apr 1;12(4):e1005962. doi: 10.1371/journal.pgen.1005962 (PMC4818034; doi:10.1371/journal.pgen.1005962)
Supplement: S5 Table — (XLSX) [file pgen.1005962.s007.xlsx]

## Sheet: Table S5
Table S5. List of promoter up-shifts with cluster information and TU definition.
Id	Strand	Pos	Xcortree	Comp	Pcomp	Sig	Psig	SigmaFactorBS	ClcortreeUA	ClcortreeUB	ClcortreeUC	BeginTU	EndTUshort	EndTUlong	Names.TUshort	Names.TUlong	Locustags.TUshort	Locustags.TUlong
U1	1	297	324	M3	1	SigA	1	cacaaagttatactatttttagcaacatattcacaggTATTTGACATatagagaactgaAAAAGTATAATTGTGTGGATaagtcgtccaactcatgatttt	UA1	UB1	UC1	297	3282	3282	S1, dnaA, S2, dnaN		new_297_516_1, SAOUHSC_00001, new_1879_2155_1, SAOUHSC_00002
U2	1	3632	1234	M3	0.939060939060939	SigA	0.988011988011988	gaattaattatttatatgtaaacggtttctacctctatttTAAATGAAATttgtgacaaaaAAAGGTATAATATATTAATGacatacaaagaaatggagtg	UA2	UB2	UC2	3632	9657	9657	NA, recF, gyrB, gyrA		SAOUHSC_00003, SAOUHSC_00004, SAOUHSC_00005, SAOUHSC_00006
U3	-1	10701	571	M3	0.992007992007992	SigA	0.993006993006993	attaagattgttgtaagcatatttaataatttatCTATTGACGAattgcatatacAGGTATAGTATTTTCTATTGtatttaacgacaaataataatgaatt	UA3	UB1	UC1	10701	9733	9733	S3, nnrD		new_10457_10702_-1, SAOUHSC_00007
U4	1	10846	1308	M3	0.993006993006993	SigA	0.994005994005994	ctctgataataggttataaatgtacgtaaaaCCATTGTTTCaataaaaatgaAAACGTATACTTCAAGAAGGatgggttacttaatataaacaagggggta	UA4	UB3	UC3	10846	12445	14128	hutH	S4, S5, serS, S6	SAOUHSC_00008	new_12457_12691_1, new_12693_12785_1, SAOUHSC_00009, new_14073_14172_1
U5	1	12457	1150	M3	0.988011988011988	SigA	1	catgtcactaaatcgacatgagtgatgtttgaaatcgtTACTTGAAAAagcaaatatagTTTGCTATATTAAAAATAACttaataagacattgttcgtagg	UA5	UB4	UC4	12457	14128	14128	S4, S5, serS, S6		new_12457_12691_1, new_12693_12785_1, SAOUHSC_00009, new_14073_14172_1
U6	1	14662	1086	M3	0.983016983016983	SigA	0.999000999000999	tgtctaacctcagacaaactgatgtctaatgTTATTGCTTAgggtatagaacTGTATTAGACTAGGTATATTattttttcgtaattatataaatataaagt	UA6	UB5	UC5	14662	15777	22152	NA, NA	S7, metX, S8, NA, NA, rplI, dnaC	SAOUHSC_00010, SAOUHSC_00012	new_15785_16105_1, SAOUHSC_00013, new_17075_17337_1, SAOUHSC_00014, SAOUHSC_00015, SAOUHSC_00017, SAOUHSC_00018
U7	1	15785	1097	M3	0.998001998001998	SigA	1	attacgatttttcttttaaaaataactgaaaaTCATTGAACAgatatttaaacTTAGGTAAACTGTTAGTAATcagaaaattctgatatacaaatcgtcta	UA7	UB5	UC5	15785	22135	22152	S7, metX, S8, NA, NA, rplI, dnaC		new_15785_16105_1, SAOUHSC_00013, new_17075_17337_1, SAOUHSC_00014, SAOUHSC_00015, SAOUHSC_00017, SAOUHSC_00018
U8	1	17339	739	M3	0.972027972027972	SigA	0.999000999000999	tattcaattaaatgaaatagaagcatacaatctatAAATTGTTAAttttcattaaaGAGGTTAAAATAATAGCTATagttaaaaatatgggagtggcttat	UA3	UB1	UC1	17339	22152	22152	NA, NA, rplI, dnaC		SAOUHSC_00014, SAOUHSC_00015, SAOUHSC_00017, SAOUHSC_00018
U9	1	22407	499	M3	0.905094905094905	SigA	1	aaaggccgaaaatcaatgttcgattttTATTTGCATTatggtctcgatATTGGTAGAATATCAAATGGttaaatgagaaaaacttggaggtgctcacatgt	UA3	UB1	UC1	22407	23733	23733	purA		SAOUHSC_00019
U10	1	24141	415	M3	0.6003996003996	SigA	1	taatagcaaaattatgtaaaaaatATCTTGTCATggcaagattggcTGTGCTATAATCTATCTTGTgcttaagaacggctccttggtcaagcggttaagac	UA8	UB1	UC1	-1	-1	-1
U11	1	24769	318	M3	0.926073926073926	SigA	0.998001998001998	aactaataaaaaatagtaatatataagtttatattggaAAATAGAATTaatagcttataAATGGTAAATTATATAATAGgttactatacgttataagacgg	UA1	UB1	UC1	24769	29581	29581	S9, walR, walK, yycH, yycI		new_24770_24930_1, SAOUHSC_00020, SAOUHSC_00021, SAOUHSC_00022, SAOUHSC_00023
U12	1	29785	834	M3	0.736263736263736	SigA	1	cattgtaaaattagtgtaactgttattttaaaAACTTTAGTAtttgtctaatcATTGTTATAATAATTAAGAAattcattgcacgtgattatcaaaattta	UA3	UB1	UC1	29785	30754	30754	S10, yycJ		new_29785_29976_1, SAOUHSC_00024
U13	1	30962	847	M4	0.946053946053946	SigA	0.999000999000999	tcgatattaaatgtaatttataaataatttacataaaatcaatcattttaatataaggatTATGATAATATATTGGTGTatgacagttaatggagggaacg	UA3	UB1	UC1	30962	33304	33304	adsA		SAOUHSC_00025
U14	1	33609	1182	M4	0.709290709290709	SigA	0.999000999000999	tatacactaaaaatcgggcataaatgtcaggaaaatatCAAAAActgcaaaaaatATTGGTATAATAAGAGGGAacagtgtgaacaagttaataacttgtg	UA9	UB6	UC4	33609	36568	36568	S11, orfX, S12, NA, S13, NA, S14		new_33610_33690_1, SAOUHSC_00027, new_34171_34472_1, SAOUHSC_00029, new_34566_34711_1, SAOUHSC_00030, new_36458_36606_1
U15	-1	38275	261	M3	0.983016983016983	SigA	1	taaacagttggatggaacttgtcaaatacctctaggggTATTTGACACatttgtgtttaTCTATTAATATATTTTTATTcaattaaaagtggaggtatgac	UA10	UB1	UC1	38275	36559	36559	NA, NA, S15, NA		SAOUHSC_00034, SAOUHSC_00033, new_37121_37217_-1, SAOUHSC_00032
U16	1	38336	912	M3	0.955044955044955	SigA	0.955044955044955	ataaacacaaatgtgtcaaatacccctagaggTATTTGACAAgttccatccaaCTGTTTAAAATACCCCTACAggtatttttagggaggttattatgaaac	UA11	UB1	UC1	38336	38472	38472	NA		SAOUHSC_00035
U17	1	40733	1383	M2	1	SigB	1	taaaatatatgtacattgtcagtcagGTGTTAGAagttcaattgcagtGGGTATATTggaaagcaaaggttttgaaaatgtggtgaatattagagaaggct	UA12	UB7	UC3	40733	42161	42161	NA, S16		SAOUHSC_00037, new_42015_42201_1
U18	-1	43674	1331	M2	0.999000999000999	SigB	0.999000999000999	cttttgtggtaatatcatcatgcataaaaaaTCGAGATActaattataaagaGGGTATAAAtatattatgaaagaaaatttttggagtgaattaccacgtc	UA13	UB8	UC3	43674	42645	42645	S18, dus		new_43614_43674_-1, SAOUHSC_00039
U19	-1	43869	434	M3	0.986013986013986	SigA	0.991008991008991	tcgctttactgtaaaagtagccaaagaaaATTCTGAATCatattcataagTAGTGTATCATTAATAATGAacaatttaatactataatccttgatctttgt	UA14	UB1	UC1	43869	42424	42424	S19, S18, dus, S17		new_43676_43869_-1, new_43614_43674_-1, SAOUHSC_00039, new_42383_42680_-1
U20	1	43873	342	M4	0.916083916083916	SigA	1	tggtaagttgatcaatacaaagatcaaggattatagtATTAAATTgttcattattAATGATACACTACTTATGAatatgattcagaattttctttggctac	UA15	UB1	UC1	43873	44371	44371	NA, NA		SAOUHSC_00040, SAOUHSC_00041
U21	1	50311	245	M4	0.924075924075924	SigA	1	atatggtaatgataatatatgaatatttttgaaaaaacACTAATATgattaaattaTTTGTTAAAATAGCATTAAgtaaaaaacaaatagggaacaaggtg	UA16	UB1	UC1	50311	50440	50440	NA		SAOUHSC_00049
U22	1	54217	1143	M3	0.991008991008991	SigA	0.999000999000999	attaaaacatcaattaaataagttttaaaattttacacatatttttatttaaaaaAGATGTATAATTAATGTATTaaatatagaaagaagttgatattatg	UA17	UB9	UC4	54217	55217	55217	plc		SAOUHSC_00051
U23	1	58776	542	M3	0.952047952047952	SigA	0.997002997002997	taaataatcatccacacacacgattcaatatgaaattcaaatatgtTGCTGTAAAATAATGTAAAAtaaacgtattcatattactgaattgagggatagta	UA3	UB1	UC1	58776	61048	61048	S23, NA		new_58776_58854_1, SAOUHSC_00056
U24	-1	60971	1030	M2	0.979020979020979	SigB	0.979020979020979	acttcaattaagtgaatcccattcgtaatcattttaATGTTTAAtgccagtgtgtccgTGATATCTAtatcatatacttctaatttcggaaaactcattcg	UA18	UB10	UC5	60971	58727	58727	S22		new_58617_60971_-1
U25	1	61153	1430	M2	1	SigB	1	gattttttatattcaaagctaaaattgcaaaaaattaATGGTTAAcatctctgttgttGGCAATATAaataatgattaatcatttatgatgtaactaagga	UA12	UB7	UC3	61153	63887	63887	NA, norC, S24		SAOUHSC_00057, SAOUHSC_00058, new_63773_63930_1
U26	1	65740	1269	M4	0.713286713286713	SigA	0.985014985014985	tcaatgtcataaatccagctgttaccagtccgattgtgataactgTCGTACCtgaactacttTGTATTAAAATAGTTACAAcgatacctgcaataacacct	UA19	UB3	UC3	-1	-1	-1
U27	-1	65977	404	M1	0.54045954045954	NM	0.556443556443556	tcatatacaaataacatatattgttaaataattttaCCTAatcttaacattaaATTTACaattataagcgataatctaaatataaagcttatttgaggtga	UA20	UB1	UC1	65977	64218	64218	NA		SAOUHSC_00060
U28	-1	68073	1261	M3	0.44955044955045	SigA	0.72027972027972	taaaaatgatctaatttcgtcaaatttaccaatataaatacTAATATTtgcaattcacaaAGGGGTATAGTCTGAGTGTattctaatacgaaaggacttgg	UA21	UB11	UC3	68073	66275	66275	NA		SAOUHSC_00061
U29	1	70701	1382	M2	0.949050949050949	SigB	0.949050949050949	cacatttaacaagcggatactcctgacgcaattatagtatcattACATATtgtttaatcgtttgGGGTAATGTaattaaaaggtaaaataggcagagtgtt	UA12	UB7	UC3	70701	73118	73135	S26, NA, S27, S28, lctP1		new_70704_70772_1, SAOUHSC_00065, new_71247_71338_1, new_71340_71507_1, SAOUHSC_00067
U30	1	71340	1010	M3	0.726273726273726	SigA	0.997002997002997	aattcctgagattattataaataatATCTAGTATTtataattaaaaTGATATATTATTTATTATAGttaaatattgtgtatattttgtgaactttttgtaa	UA22	UB12	UC6	71340	73135	73135	S28, lctP1		new_71340_71507_1, SAOUHSC_00067
U31	-1	75017	236	M3	0.854145854145854	SigA	0.998001998001998	cttacctttaaatttaattataaatatagattttaGTATTGCAATacataattcgtTATATTATGATGACTTTACAaatacatacagggggtattaatttg	UA23	UB1	UC1	75017	73347	73347	spa		SAOUHSC_00069
U32	-1	76199	237	M3	0.504495504495505	SigA	0.996003996003996	aaattttaataaaaatatcatattatttttaattgtaaattatggatTATTTttcttattatatTGTGTTATATTAAAATAAAgtgcatatacaaggagat	UA23	UB1	UC1	76199	75268	75268	sarS		SAOUHSC_00070
U33	-1	76927	1315	M2	0.997002997002997	SigB	0.997002997002997	aagcttatacatggctagtcggaagtctttacggtgctACGTTTAAagatacaatcattttGGGTATGGTtattttagctgttgtgccgttgttatttctt	UA24	UB13	UC3	76927	76526	76526
U34	-1	79577	197	M3	1	SigA	1	taattataagttgcatgtaaatcataaatattTTATTGACTTaggaaaaaattTAATTCATACTAAATCGTGAtaatgattctcattgtcatacatcacga	UA25	UB14	UC1	79577	76509	76509	S31, sirA, sirB, S30, sirC		new_79520_79577_-1, SAOUHSC_00074, SAOUHSC_00072, new_77436_77515_-1, SAOUHSC_00071
U35	1	79653	187	M3	0.999000999000999	SigA	0.999000999000999	cctaagtcaataaaatatttatgatttacatgcaacttataatTATTTGACATataaatgcataAAAAATATAATCCTAATTACttgatagtgagaatcat	UA25	UB14	UC1	79653	91019	91019	S32, sbnA, sbnB, sbnC, sbnD, sbnE, sbnF, sbnG, sbnH, sbnI, S33		new_79653_79884_1, SAOUHSC_00075, SAOUHSC_00076, SAOUHSC_00077, SAOUHSC_00078, SAOUHSC_00079, SAOUHSC_00080, SAOUHSC_00081, SAOUHSC_00082, SAOUHSC_00083, new_90968_91059_1
U36	1	91112	215	M3	0.968031968031968	SigA	0.999000999000999	tgatattttataaatattgaagttctccatttttgtattttGCATATAAAAattaaataaaaTAAGGTATATTAAGGTAAAGtataaattttaaataaatg	UA26	UB15	UC1	-1	-1	-1
U37	1	92409	1459	M3	0.815184815184815	SigA	0.917082917082917	ataccttaaatatctgaatattttgttaaatggagctaccttTGTTGTACTattcaaatgaagAGGAGTAAAATGTAATTAAAggaaagaaatttgaggag	UA27	UB7	UC3	92409	93229	93229	butA		SAOUHSC_00086
U38	1	99451	1128	M3	0.99000999000999	SigA	0.999000999000999	ttatataattggatataacaaataaataataaTTATTGCAAAacacacccaaaaTTAATTATTATAAAAGTATAttcataaaaggaggaatatacttatgg	UA28	UB9	UC4	99451	100080	100080	sodM		SAOUHSC_00093
U39	1	100415	1122	M3	0.707292707292707	SigA	0.999000999000999	tttataaaaaaatgtaatgattcaaaaattTTGTTGCATTtcttttgtaatCGTATGATAATGTAAATGTAatcaaattgtaatataaggggacaagacaa	UA29	UB16	UC4	100415	101219	101219	NA, S34		SAOUHSC_00094, new_101055_101194_1
U40	-1	102147	1005	M4	0.541458541458541	SigA	0.998001998001998	caaagcctatctatatttaatttttataatttTTCCAATTtgagtaaaaatTATTGTATGATGAGAGTGATtaagtaactttatggaggttgtctacgtga	UA30	UB17	UC1	102147	101312	101312	NA		SAOUHSC_00096
U41	1	103735	1259	M2	0.94005994005994	SigB	0.94005994005994	ttaattctagtggcaactattgctacaacagtcatgCTGTTTATtacgaactttaattGGTTATATAtgattggtgccttaattgcgattatcgtttttgc	UA31	UB18	UC3	103735	104449	106387		deoB		SAOUHSC_00101
U42	1	104467	1235	M3	0.832167832167832	SigA	0.988011988011988	tggacacaatctgaaaaataaatagatataaaTTCGCGAGATatattcgtattTATAGTAAAATTAAATAAAGagattatataacacgaggagtagtaagt	UA32	UB2	UC2	104467	106387	106387	deoB		SAOUHSC_00101
U43	1	111842	1003	M3	0.985014985014985	SigA	1	caaagattcgtttaaaactcggtgacaaaacctTGATTACAAcagacttcaaatAAATATATAATAGAAATAAGaaagatgtttgtgattgaaggagtgag	UA33	UB17	UC1	111842	111929	111929
U44	1	116492	62	M3	0.834165834165834	SigA	1	aatattcgaaattaaacttttttgtatagaattTTCTTTATATcctgagagacaTGTACTATAATGTTTGTGAAataattcacaaagtataaaggagtggt	UA34	UB19	UC7	116492	119188	119188	adhE		SAOUHSC_00113
U45	1	119353	67	M3	0.886113886113886	SigA	0.992007992007992	ttaaataaagaaaatattaagattgatactcatttcacaaactattactacttTAGAGTATAATTATTTTTAAtttcatataaataaaaaggcgaaaataa	UA35	UB19	UC7	119353	133604	136035	S37, capA, capB, capC, capD, capE, capF, capG, capH, capI, capJ, capK, capL, capM, capN	capO, S38, capP	new_119358_119437_1, SAOUHSC_00114, SAOUHSC_00115, SAOUHSC_00116, SAOUHSC_00117, SAOUHSC_00118, SAOUHSC_00119, SAOUHSC_00120, SAOUHSC_00121, SAOUHSC_00122, SAOUHSC_00123, SAOUHSC_00124, SAOUHSC_00125, SAOUHSC_00126, SAOUHSC_00127	SAOUHSC_00128, new_134839_134914_1, SAOUHSC_00129
U46	1	119439	1454	M2	0.984015984015984	SigB	0.984015984015984	aaaaggcgaaaataatgcggtttaaaagtaattaaTTGTTTAAacgatatgtaataTGTAAATACtatatatataataccaattttaatgaaaatttttaa	UA12	UB7	UC3	119439	136052	136052	capA, capB, capC, capD, capE, capF, capG, capH, capI, capJ, capK, capL, capM, capN, capO, S38, capP		SAOUHSC_00114, SAOUHSC_00115, SAOUHSC_00116, SAOUHSC_00117, SAOUHSC_00118, SAOUHSC_00119, SAOUHSC_00120, SAOUHSC_00121, SAOUHSC_00122, SAOUHSC_00123, SAOUHSC_00124, SAOUHSC_00125, SAOUHSC_00126, SAOUHSC_00127, SAOUHSC_00128, new_134839_134914_1, SAOUHSC_00129
U47	-1	137051	186	M3	0.99000999000999	SigA	0.995004995004995	tttgcacataaaaataatcttattttcgaaaacATATTGCACTtttcaaaaataAAACACATAATATAACTATAatacttgagaataattctcattaaata	UA25	UB14	UC1	137051	136128	136128	S39, NA, isdI		new_136842_137046_-1, SAOUHSC_00131, SAOUHSC_00130
U48	1	137184	1282	M3	0.967032967032967	SigA	0.991008991008991	gttttaaaaatgagacttctgtgagctgatTATTTTATAAaatgtaaacgctTACTATATAATGTGAATCATatcgtttaaaagcattattaaatatgatg	UA36	UB3	UC3	137184	138874	138874	S40, aldA, S41		new_137191_137267_1, SAOUHSC_00132, new_138756_138912_1
U49	1	139248	1431	M2	1	SigB	1	aaagcaaagcgcgagtgtgctgtaaaagttttccaaggTGATATTacataaagctataaaGGGTAAAGAttaatgagttgtcatgtaaatgacgatgatgt	UA12	UB7	UC3	139248	140353	140353	S43, NA		new_139248_139400_1, SAOUHSC_00133
U50	-1	140667	1401	M2	0.985014985014985	SigB	0.985014985014985	tttttaaatatttagataaaattctgtaaaatatattttcaAAGAGTATaaaaatcatgttaGGGTATAAGtaaataaacatatatatagggggctatcat	UA12	UB7	UC3	140667	138967	138967	NA, S42		SAOUHSC_00134, new_138934_140421_-1
U51	1	140764	96	M3	0.986013986013986	SigA	1	gaattttatctaaatatttaaaaaaatatcttaataTCCTTGTAATccgataagaatTATAGTAATATTTTTTCAACcattgttataggaggtcttattaa	UA37	UB20	UC1	140764	145759	145759	NA, S44, NA, NA, NA, NA, S45, NA		SAOUHSC_00135, new_141317_141657_1, SAOUHSC_00136, SAOUHSC_00137, SAOUHSC_00138, SAOUHSC_00139, new_145189_145358_1, SAOUHSC_00141
U52	1	145360	1157	M3	0.999000999000999	SigA	0.999000999000999	gaaaatatacatttcgtaataataataatcgttaTCATTGAAAAagtgttaataAGGTGTATAATGAAAATGTGaacaattaatgaacttcttattttaaa	UA38	UB21	UC4	145360	147000	147000	NA, S46, fdh		SAOUHSC_00141, new_145805_145936_1, SAOUHSC_00142
U53	-1	145393	26	M1	0.988011988011988	NM	0.99000999000999	ctagattcgagaattgttgttctttagtatgcGTATCtatagtattcaCCTTCtttaaaataagaagttcattaattgttcacattttcattatacacctt	UA39	UB22	UC8	-1	-1	-1
U54	-1	145784	1489	M1	0.997002997002997	NM	0.997002997002997	tgacataccacccccttgaattattgttaaattcaaagcgaagttagcaaaCAGCACcgtgtaccttacaCCagcaacacttattctattgacttatcgaa	UA40	UB23	UC9	145784	145512	145512
U55	1	147160	1222	M3	0.997002997002997	SigA	0.999000999000999	atttaacatttacgcacatatgtgttcacttacgcaaTTATTGATAAatttcattcattTGGAATAATATATAGTCATAtagtgctaatttttttgaggca	UA41	UB24	UC4	147160	156860	156860	S48, lmrP, S49, NA, NA		new_147204_147347_1, SAOUHSC_00143, new_148599_149044_1, SAOUHSC_00144, SAOUHSC_00145
U56	1	147204	1224	M3	0.556443556443556	SigA	0.815184815184815	taaatttcattcatttggaataatatatagtcatatagtgctaatttttttgaggcattatatgcaagatgcattgtaaagtcgatgcatttgtttgttaa	UA42	UB24	UC4	147204	156860	156860	S48, lmrP, S49, NA, NA		new_147204_147347_1, SAOUHSC_00143, new_148599_149044_1, SAOUHSC_00144, SAOUHSC_00145
U57	-1	157739	41	M3	0.96003996003996	SigA	1	atttgtttatcaaaatattttaagttttgcaaagctttTTATTGTGATtattttcacaaAATACTATAATGAGGATAGTaaatagagaggagtccttaagt	UA43	UB25	UC7	157739	157208	157208	NA		SAOUHSC_00146
U58	-1	157837	158	M4	0.793206793206793	SigA	0.999000999000999	ccattgcgctaaaacatttatttaccgttcatctcgtTAACAATTTtgaatacagTACGATACAATATGAGATGtaaaaaactaataaccttttacaaatt	UA44	UB26	UC1	157837	157752	157208		NA		SAOUHSC_00146
U59	-1	163904	581	M4	0.836163836163836	SigA	1	ttttcaaaaaatttagtatttattgcaaaattatgTATCACTTTatgtttaattTTTGATATTATCTTAATTAagtagatttttataagttctaaaaagga	UA3	UB1	UC1	163904	162512	162512	brnQ1		SAOUHSC_00151
U60	-1	166427	124	M3	0.972027972027972	SigA	0.981018981018981	ttgttagcgttttcacaacaaagtcaactTCCTTGACCTtacactatattcGAGGCTATCATTTTAAGTGTaaatatagagaaaaggtggctttttttatg	UA45	UB27	UC1	166427	163991	163991	ipdC, S50, entB		SAOUHSC_00153, new_164623_164748_-1, SAOUHSC_00152
U61	-1	168955	793	M4	0.813186813186813	SigA	0.998001998001998	acaattaagagatttgaaattgaatttaataattgtaTTGAAAAcgcatacttcacCATGCTAAAATAGGAGTCGcaaacaaataagattcaataagatgt	UA3	UB1	UC1	168955	166711	166711	S51, ptsG		new_168661_168955_-1, SAOUHSC_00155
U62	1	169226	1294	M3	0.982017982017982	SigA	1	taagattattacaatgaacaggctttaactgattaATATTGTAATgtgttttctctTATAGTAAAATGTAAGCGATtacacaaatcaactatattttccta	UA36	UB3	UC3	169226	173724	173724	S52, NA, murQ, murP, NA, S53		new_169226_169308_1, SAOUHSC_00156, SAOUHSC_00157, SAOUHSC_00158, SAOUHSC_00160, new_173590_173751_1
U63	1	174239	248	M4	0.809190809190809	SigA	0.997002997002997	attagaataaatttacgtttgaagataaaaaacaaacatttttcattaaagttTATGATATATTTAGAGCAAtagaaagtgtatggaaggggatatgaatg	UA16	UB1	UC1	174239	177056	177056	hsdR		SAOUHSC_00162
U64	1	177210	1198	M3	0.64035964035964	SigA	0.991008991008991	atttggtttcaatacaattttataatcgtatgtgtatagaaaTaaTGTCTATaggcatttaaaaTAGTTTATAATATTAACAGGataagcattaaatgtat	UA46	UB6	UC4	177210	180116	180116	NA, NA, NA		SAOUHSC_00163, SAOUHSC_00164, SAOUHSC_00166
U65	1	182037	1072	M3	0.991008991008991	SigA	1	ttctaataaatttgacatgatgttgtgcctccCTATTCACAAatgtgtaaattTATTCTATACTTTTGTATATcatagtaatctactcaagattattttac	UA47	UB5	UC5	182037	188548	188548	NA, rlp, ggt, S55		SAOUHSC_00169, SAOUHSC_00170, SAOUHSC_00171, new_188435_188581_1
U66	-1	182058	98	M3	0.996003996003996	SigA	1	cttaaaagattctaaataagtaattatgataatcacTCCTTGTAAAataatcttgagTAGATTACTATGATATACAAaagtatagaataaatttacacatt	UA37	UB20	UC1	182058	180226	180226	NA, S54		SAOUHSC_00167, new_180199_180401_-1
U67	-1	189555	216	M3	0.903096903096903	SigA	0.997002997002997	attattttcataaatttaaaatttgatattcactttaatacTGATGTAAATatttttcaaaaTATATTATTATAGTGTTAATgaagtattttgagaaacgg	UA26	UB15	UC1	-1	-1	-1
U68	-1	190377	1351	M3	1	SigA	1	gccaaatatagatgaagaaaatgatggtaatttgaatatttTGATTGATATtaaattttataTCGAGTATAATAATTATACTtaagaaaataacagaaaca	UA48	UB28	UC3	190377	189712	189712	acpD		SAOUHSC_00173
U69	1	190486	931	M3	0.993006993006993	SigA	0.999000999000999	tctatatttggcagtactactaaagtatgagTGCATTTAATtatgaaatagtTGATTTAGAATATATACTTAatacccaaaatatatgaaggatggatgcc	UA49	UB29	UC1	190486	191115	191115	NA		SAOUHSC_00174
U70	-1	200149	393	M3	0.863136863136863	SigA	0.966033966033966	acacatacttagaaacatatttatgtactaaaattaataaatagtTAATAGTATTtgacaagctttATCTATAAAATACTTTATGTtgtcaaaatcaacgc	UA20	UB1	UC1	200149	199589	199589	NA		SAOUHSC_00182
U71	1	200278	1117	M1	0.705294705294705	NM	0.721278721278721	agtattttggataatttaataattttaaggatattaagcgcttacaCCGAcgtgatatattTGGCTTAacgaaaatgattgaggtgacagagatgaacttt	UA50	UB30	UC4	200278	201927	201927	uhpT, S58		SAOUHSC_00183, new_201740_201913_1
U72	1	201740	1118	M1	0.92007992007992	NM	0.963036963036963	aaaaatttaatataaatcggattaaaagtatcgccaatctattgcaatatagttggcaatcctgccccgacggcatgtgcgtgaagagatgaaagatactg	UA50	UB30	UC4	201740	201927	201927	S58		new_201740_201913_1
U73	-1	205356	845	M4	0.535464535464535	SigA	0.998001998001998	gtcatctataaacatttctaaatatttaacattaCTtatgcgtcatttATTGCTAAAATTATTGTATTaaaatatacatagaattgatgggatatcatgaa	UA3	UB1	UC1	205356	204842	204842	NA		SAOUHSC_00186
U74	1	205838	52	M4	0.985014985014985	SigA	0.999000999000999	ttgacatacatttgatgaaaattgtacataatttatgtgaaaaaaatcacaacaaaCATGCTACAATGACTATGAaaacgttaacatagcatttcaaattc	UA43	UB25	UC7	205838	208931	208931	S59, pflB, pflA		new_205837_205907_1, SAOUHSC_00187, SAOUHSC_00188
U75	1	209236	612	M3	0.926073926073926	SigA	0.997002997002997	gcatatgaatatgagtcttttcaaatttTTATTGACCCtgagtaatgaaaAATATTAAGATGAAACTTAAtattaaagcaatgcggagcgtgattatgaag	UA3	UB1	UC1	209236	209339	209339	NA		SAOUHSC_00190
U76	-1	211591	429	M3	0.99000999000999	SigA	1	actagaataaacaaagcattaactatctttttgttatagttAATTAGCTTTgcaatatacaaTAGTGTATAATTTTTTTGATtaatgtacatcaaaggagt	UA51	UB1	UC1	211591	211132	211132	NA, S60		SAOUHSC_00191, new_211095_211197_-1
U77	1	211692	383	M3	0.984015984015984	SigA	0.986013986013986	aatgctttgtttattctagttaatatatagttaatgTCTTTTAATAttttgtttcttTAATGTAGATTGGGCAATTAcattttggaggaattaaaaaatta	UA20	UB1	UC1	211692	213810	213810	coa, S62		SAOUHSC_00192, new_213643_213850_1
U78	1	222378	21	M1	0.987012987012987	NM	0.992007992007992	tttcaagcaagtcacctccatcacatttgataaaatatagcgtttTTACACTttgtgtaaacCCTTACaagaaatataacataacgacgtttaaaatcaat	UA39	UB22	UC8	-1	-1	-1
U79	-1	222397	1292	M3	0.822177822177822	SigA	1	ctatactgtgtctattatcagaataaaaagatatttcTAATTGATTTtaaacgtcgtTATGTTATATTTCTTGTAAGggtttacacaaagtgtaaaaacgc	UA36	UB3	UC3	222397	212917	212917	fadX, fadE, S65, fadD, S64, fadB, fadA, S63, NA, NA, S61		SAOUHSC_00199, SAOUHSC_00198, new_219119_219229_-1, SAOUHSC_00197, new_217722_217906_-1, SAOUHSC_00196, SAOUHSC_00195, new_214121_214245_-1, SAOUHSC_00194, SAOUHSC_00193, new_212870_213823_-1
U80	1	222650	855	M3	0.987012987012987	SigA	1	acaaagtgcccaatcgaacaaagtatttatattaaaATATGGAAAAtccatcaatatTAAATTAAAATAGTTTTATTatgaaaagtgaaagtaggtaagtc	UA3	UB1	UC1	222650	224129	224129	S66, NA		new_222650_222778_1, SAOUHSC_00200
U81	-1	225767	209	M3	0.954045954045954	SigA	1	aattaattgaactttaataattactaaacttgaacaaCATTTTACTTtaacaaaataaAGTTTTAAAATATTAATTGTtgggttttacatagtaattagaa	UA52	UB15	UC1	225767	224273	224273	S67, NA		new_225648_225767_-1, SAOUHSC_00201
U82	-1	227810	48	M3	0.963036963036963	SigA	0.976023976023976	caattatcaaatttgccattttatttatattttctcaaaccaatTAATTGAATAtcgaaatttttAGTAGAATAATCAAAATATAcagattaaaggaggag	UA43	UB25	UC7	227810	225786	224273	NA, NA, S68, NA	S67, NA	SAOUHSC_00204, SAOUHSC_00203, new_226265_226387_-1, SAOUHSC_00202	new_225648_225767_-1, SAOUHSC_00201
U83	1	228156	42	M3	0.886113886113886	SigA	0.997002997002997	aaaaattaaaataaaatgtgaaataaatcacaatttaATATTGACCCagtacttaatgCATGTTACATTTTATATGTGaaataaatcacaaacttaaaagc	UA43	UB25	UC7	228156	230521	230521	S69, ldh1, S70, NA, S71		new_228158_228481_1, SAOUHSC_00206, new_229362_229501_1, SAOUHSC_00208, new_229646_230633_1
U84	-1	228183	38	M1	0.435564435564436	NM	0.501498501498502	catctcttttattttcaacgcataacttaaaaggtcatgtgTCATCCGcttttaagttTGTGATTTATttcacatataaaatgtaacatgcattaagtact	UA53	UB31	UC7	-1	-1	-1
U85	1	230986	547	M3	0.945054945054945	SigA	0.969030969030969	accggtaaattttggaaaacaatactacctgcagctgacatTAATGTAAAAatattttgtaaTAAGGTAATATCTAAAATAGggtatgctttaacggtgtt	UA3	UB1	UC1	230986	232442	232442	S72, NA		new_230986_231501_1, SAOUHSC_00211
U86	1	232544	73	M5	0.883116883116883	NM	0.897102897102897	aagcgtccttagggtttttgtattgggttacaatggtcatgacaatttgataatgattgagatatgtatgttaaaaatgcttcaaaaaaacacaaaacaca	UA54	UB32	UC1	232544	232578	232578
U87	1	239651	988	M4	0.964035964035964	SigA	0.997002997002997	tgataatttttaaagtgaaaatcaagtacagccacttaataagATAAATTtattataataTATGGTAAAATGATGGCAGtaataatgaatttgaaaaagag	UA55	UB33	UC1	239651	243560	243560	S73, ispD, NA, S74, NA, S75		new_239650_239968_1, SAOUHSC_00220, SAOUHSC_00221, new_241662_241835_1, SAOUHSC_00222, new_243378_243605_1
U88	1	243654	677	M3	0.4995004995005	SigA	0.988011988011988	ctaattcataaatgtgtaaacacatacgttatgaATGGATAAcgattttttgtTATGTTAAAGTGGTACATTAatcatgtatttcgtatgataattaacga	UA3	UB1	UC1	243654	250428	250445	S76, tagF, S77, S78, ispD, NA, NA, NA		new_243662_243804_1, SAOUHSC_00223, new_244975_245052_1, new_245054_245249_1, SAOUHSC_00225, SAOUHSC_00226, SAOUHSC_00227, SAOUHSC_00228
U89	1	245054	293	M4	0.883116883116883	SigA	0.999000999000999	aattataaattaattagttaagtgatataaataataaacgaaatgtttgcttgTATGTTATTATTTGTGTATgaaaacgtctgatataatgtaatataggt	UA1	UB1	UC1	245054	250445	250445	S78, ispD, NA, NA, NA		new_245054_245249_1, SAOUHSC_00225, SAOUHSC_00226, SAOUHSC_00227, SAOUHSC_00228
U90	1	250561	50	M3	0.997002997002997	SigA	1	tgctgtttatgacatgattatgacatttccctgatttTCATTTTCATatacattaaaTTGTATACACTGGAAATGAGgaggttatctataatgataaataa	UA43	UB25	UC7	250561	251329	251329	scdA		SAOUHSC_00229
U91	1	251469	569	M4	0.772227772227772	SigA	1	tagataattaaatagtagcgtgtttttttaataatttattcatgaattttacatgcactatTATGATAAAATAAACATAAttataattcactgaggtgcta	UA3	UB1	UC1	251469	253981	253981	lytS, lytR		SAOUHSC_00230, SAOUHSC_00231
U92	1	254099	1100	M3	0.566433566433566	SigA	0.592407592407592	tatgatattttgtatttcggactaaaaatcacgcaaatcgaagtgagCCATCTATACTTTAGTTAAAtcaaacgtaggaggcaatggtcgtgaaacaacaa	UA56	UB34	UC5	254099	255307	255307	lrgA, lrgB		SAOUHSC_00232, SAOUHSC_00233
U93	-1	256115	375	M4	0.962037962037962	SigA	1	cttacctccaattataattgtaccggttcaatttgtaaacgccgATACAATtataatatttTGTGCTATAATAATTACAGacaaagtgaaacgaggacaga	UA57	UB1	UC1	256115	255383	255383	bglR		SAOUHSC_00234
U94	1	256164	929	M3	0.97002997002997	SigA	0.993006993006993	attatagcacaaaatattataattgtatcgGCGTttacaaattgaACCGGTACAATTATAATTGGaggtaagtaaatacattttcattctactatcaagtt	UA49	UB29	UC1	256164	258503	258503	NA, bglA		SAOUHSC_00235, SAOUHSC_00236
U95	-1	259701	191	M4	0.96003996003996	SigA	1	ataaatgaagtgacaattttttgtaatctttttaacttcCAAATTATcgcatataaaTATGCTATATTAATGATAAtaattatcaattaaaaggaggttat	UA25	UB14	UC1	259701	258919	258919	NA		SAOUHSC_00237
U96	-1	262183	1133	M4	0.778221778221778	SigA	0.988011988011988	agtttttatgaaaacgcATGCATTTTacaaataaaAATGGTACGATGGCACTGGtaaaacgttttactaaaaacaaatcatgaggtgtataacatgagcat	UA58	UB9	UC4	262183	261503	261503	rbsU		SAOUHSC_00241
U97	-1	263439	1325	M2	0.78021978021978	SigB	0.78021978021978	agacaataaaagtcattcacgtcttcatatgtcatcaaatgtttatcaTGATATGatgaatataataatcGGGTATATaactgtatgattaattacacaat	UA59	UB8	UC3	263439	262387	262387	NA		SAOUHSC_00242
U98	1	263691	371	M3	0.981018981018981	SigA	0.99000999000999	ttttaaagaataaaatatttgtttttgaacaaaGTATTAAAAAacataacgaaaTGATGTATATTGAACTATGTgattgaaaaaatttttaattaaggctt	UA60	UB1	UC1	263691	264079	264079	NA		SAOUHSC_00244
U99	-1	266310	200	M4	0.837162837162837	SigA	0.999000999000999	catactataaaaaatcaattatacaagcaattaattgaTATTCATtctcaataacTGTGGTATGATATGTAAGGaaatcatgacttatgtgtgagtgaacg	UA25	UB14	UC1	266310	264750	264750	S81, NA, S80		new_266202_266310_-1, SAOUHSC_00246, new_264705_264824_-1
U100	1	266361	182	M3	0.989010989010989	SigA	0.999000999000999	acatatcataccacagttattgagaatgaatatcaatTAATTGCTTGtataattgattTTTTATAGTATGTTTAAGTGaaacagctttatttgaaagtgat	UA25	UB14	UC1	266361	268686	268686	S82, NA, S83, lytM		new_266361_266434_1, SAOUHSC_00247, new_267428_267696_1, SAOUHSC_00248
U101	1	267698	502	M3	0.997002997002997	SigA	0.998001998001998	ttaaatagttggaaaatgagaattaaatcctttactcagTTGTCTAATtcttttagtatgTGCAGTACAGTTTAATTGAAaactaactttaactttaatgg	UA3	UB1	UC1	267698	268686	268686	lytM		SAOUHSC_00248
U102	-1	273138	364	M3	0.998001998001998	SigA	1	aaaattctattaatttaaacaaaatttaaaataaaCCATTTAATAaaatgtattgtTCTGATATGATTAACTCATAaataattgggaggaagcaaaatgtc	UA60	UB1	UC1	273138	271618	271618	NA		SAOUHSC_00253
U103	1	273208	365	M3	0.967032967032967	SigA	0.994005994005994	acattttattaaatggtttattttaaattTTGTTTAAATtaatagaattTTAGTTATAATAATGTTTAAtaagttattggaaatctaataaactacaaaaa	UA60	UB1	UC1	273208	274160	274160	NA, NA		SAOUHSC_00254, SAOUHSC_00255
U104	-1	275721	1140	M3	0.965034965034965	SigA	1	ttgaatataaccatatatttttaattaaCCATTCATTTttgtaatataaATGTGTATACTAAAATTAAAttaaatacataaaggattaaatggttattatg	UA17	UB9	UC4	275721	274916	274916	NA		SAOUHSC_00256
U105	1	275837	1130	M3	0.996003996003996	SigA	1	ttcaatatatttattttaaaaaagctaaaaatacttaaaaaaCTATATACATatactaataatTTATATATTATTTGAGTAAGgagcactttttcaaaaaa	UA61	UB9	UC4	275837	276183	276183	S84, esxA		new_275843_275930_1, SAOUHSC_00257
U106	1	281198	1232	M1	0.742257742257742	NM	0.883116883116883	aatgataaacgttctgaagaaacgaaaaagtataacgataaattgcaagatattttagacaaagaaaaacaagttaaagatgaaaaagcgaaatctgaaga	UA62	UB35	UC2	281198	281317	281317
U107	1	288855	343	M3	0.968031968031968	SigA	0.991008991008991	acataaagcgtgctgttacaccacaaaatCACGTGACACatggtccaaaaGATAGTATGGTGAGAAGTGAaggcaaacatagtataagtagccatgaaatg	UA15	UB1	UC1	288855	291908	291908	NA, NA, NA, S85, NA		SAOUHSC_00269, SAOUHSC_00270, SAOUHSC_00271, new_291566_291700_1, SAOUHSC_00272
U108	-1	291219	400	M3	0.97002997002997	SigA	1	aagctttcaactgaattgtattcagatttattaactattcCACTTGAACTatctgtaatgtTCTTATATTTTAGTAATAGTggtctgttccaaagatttct	UA20	UB1	UC1	-1	-1	-1
U109	-1	297203	44	M3	0.987012987012987	SigA	0.999000999000999	attagtttttaaaattaattttgtgaaaTTATTCACAAataaggcaattCATAGTATACTCTGATTAACaaatgaaaagtgaggatgtcattgtgaaggag	UA43	UB25	UC7	297203	296047	296047	NA, S88		SAOUHSC_00281, new_295925_296346_-1
U110	-1	297237	60	M3	0.941058941058941	SigA	0.986013986013986	atttgttaaaaaatcctagctgttattcaaaaatattagtttttaaaattaaTTTTGTgaaattattcacaaataaggcaattcatagtatactctgatta	UA63	UB25	UC7	-1	-1	-1
U111	-1	298821	582	M3	0.897102897102897	SigA	0.999000999000999	gacactttaattgtcattatccaataatagcaagacgttaTTATTGCAATcttttttataaAATAATAGAATCATAGTATTgtcatttaaagataaagtaa	UA3	UB1	UC1	298821	297407	297407	S89, brnQ2		new_298686_298818_-1, SAOUHSC_00282
U112	1	299256	843	M3	0.999000999000999	SigA	0.999000999000999	ttttcaagaaataatattaaatatcttttcataGTATAGCAATattaaataaatGCATTTATAATTTTAACTGTattttaaatattaatcatgaggtgata	UA3	UB1	UC1	299256	300170	300170	NA		SAOUHSC_00284
U113	1	300333	1450	M2	1	SigB	1	aaataatagacaattaattgcattttccataaattTGCTTTTaatataaaaagttcGGGTATAATgaaggataagtgtatgtataacattacagagcgcaa	UA12	UB7	UC3	300333	302159	302159	S90, NA, NA		new_300340_300437_1, SAOUHSC_00285, SAOUHSC_00287
U114	1	302318	826	M3	0.994005994005994	SigA	0.999000999000999	taattattatcgaaaatcagaaatatTCCGTGAAATataatatttttTGTAGTAAAATGGCCTCTAAgtattcaatatttaaatatggggattgaatataa	UA3	UB1	UC1	302318	303434	303434	S91, pfoR		new_302318_302465_1, SAOUHSC_00290
U115	-1	309613	1312	M3	0.994005994005994	SigA	0.998001998001998	tacataaatatgactacaattttcaaaaagATATTGTTACattttatgataGCGTTTACAATTATAGCTGTaaactatattatcaaatgatttttggaggg	UA4	UB3	UC3	309613	309511	309511	nanA		SAOUHSC_00295
U116	-1	311699	578	M3	0.951048951048951	SigA	0.965034965034965	ttacaatatatcattaagataatttttatcaatgcttttTACTATCTTgaaaatattttTCATATATAATAGTAATCATtaagatgaaggggtgacacaat	UA3	UB1	UC1	311699	310922	310922	NA		SAOUHSC_00297
U117	-1	314020	1284	M3	0.997002997002997	SigA	1	atagtttcaatctatatataattagttaatttgTATTGGTATGaaaataattcaAACTATACAATTATAGTAAGttttcagatttttctaaattaaaataa	UA36	UB3	UC3	314020	312588	312588	NA		SAOUHSC_00299
U118	1	314264	1134	M4	0.794205794205794	SigA	0.989010989010989	ttattaaatttttattaattttgtagtcttaatcaaaaaataatatatgtCATGTTATATTGAAGGTGCagttgtttttcattctcaagagggggtcaaaa	UA58	UB9	UC4	314264	316490	316490	S92, geh, S93		new_314263_314325_1, SAOUHSC_00300, new_316416_316527_1
U119	-1	318776	789	M3	0.976023976023976	SigA	0.998001998001998	atgtaccaattctattctatcaagactgttcaTCATTGATTAttcattctttcCATGGTACTTTGAAAACAATattgaatagaaaaggaatcatagtatgt	UA3	UB1	UC1	318776	318589	318589	NA		SAOUHSC_00302
U120	1	318955	241	M3	0.611388611388611	SigA	0.766233766233766	atgaaaaagaaaaataaaggcgaaaAGATATAAAAgttaattgaaaAACGTTATCATATACGTGGGtatatgaagagggaatggtattaagaacgctaaaa	UA64	UB1	UC1	318955	324463	324463	S95, NA, S96, NA, NA, NA, NA, S97, S98, NA		new_318955_319040_1, SAOUHSC_00304, new_320043_320135_1, SAOUHSC_00305, SAOUHSC_00306, SAOUHSC_00307, SAOUHSC_00308, new_323144_323301_1, new_323303_323457_1, SAOUHSC_00309
U121	1	323303	1437	M2	1	SigB	1	attgcctttaactattcaaagtatgatatatataTGGTTTTTgtttctaaatgattGGGTATTTGaaaatagatgagtttaatattttaaggaatataatg	UA12	UB7	UC3	323303	324480	324480	S98, NA		new_323303_323457_1, SAOUHSC_00309
U122	-1	328653	1119	M3	0.633366633366633	SigA	0.639360639360639	tgcaatttttcggattaaaatatgaaagagattgcATATCTACGTttttaagaaaTCGCTTACAATTACAAATAGgaggatattacgttgttaagttatag	UA65	UB30	UC4	328653	324590	324590	NA, NA, NA, ulaA		SAOUHSC_00313, SAOUHSC_00312, SAOUHSC_00311, SAOUHSC_00310
U123	-1	328687	92	M3	0.936063936063936	SigA	0.987012987012987	tcctataaaatcttgcgccataaACATTTTGATatgcaatttttCGGATTAAAATATGAAAGAGattgcatatctacgtttttaagaaatcgcttacaatt	UA66	UB36	UC1	-1	-1	-1
U124	1	328797	573	M3	1	SigA	1	attttataggaacttttaaaataaattagatattcATGTTGACAAtttaaaaatgtCGCAGTATATTTAGTTAGACatctaacgaaatggtggtgcaataa	UA3	UB1	UC1	328797	330362	330362	mepR, S99, mepA		SAOUHSC_00314, new_329258_329363_1, SAOUHSC_00315
U125	-1	332755	437	M3	1	SigA	1	caataactaaatatgcaagatttcacaaaagcATATTGACAAcgctttcatacATGTCTAATATAAGTTTATCgcacaaaatgcatataaatacatattaa	UA14	UB1	UC1	332755	332665	332665
U126	1	332948	1434	M2	0.995004995004995	SigB	0.995004995004995	tatacatactagctgtgtatctacgaatgagtacaaacatatttttatttgcaagGGGTAAATGgcatataactatcttttttatgtaagctggtataaaa	UA12	UB7	UC3	332948	335564	335564	NA, NA, NA		SAOUHSC_00318, SAOUHSC_00319, SAOUHSC_00320
U127	-1	336675	786	M4	0.697302697302697	SigA	1	ttaatcactactttattattcattccaaatttatatTTAAAAatacgacaaaacAGTGCTAAAATGCTATTAAaggaggcactgctcatggcatcattgaa	UA3	UB1	UC1	336675	335674	335674	NA		SAOUHSC_00322
U128	1	337010	1074	M4	0.921078921078921	SigA	1	tacaagcaatgcaagttggggaaggacaacaaatttaagATACAATGCgtaacattaaTATGTTATTATAATGATAAtttacagaattatatgaaaaatga	UA6	UB5	UC5	337010	337604	337604	NA		SAOUHSC_00324
U129	-1	342712	978	M3	0.988011988011988	SigA	0.998001998001998	acattttaattatttcataaaattTTATTGATAAtcattatcgttCGGTATAAAGTAAATACTATatactacttatgagtgaggttgattatcatgataac	UA67	UB33	UC1	342712	341692	341692	NA, S101, tatC, S100		SAOUHSC_00329, new_342403_342463_-1, SAOUHSC_00328, new_341650_341745_-1
U130	-1	343245	505	M3	0.978021978021978	SigA	0.978021978021978	caaacacctcaacgcctacaagtcataaTTGTTTACTTtcgttacacctTCCTGCATAATTAACAGCATtctaattttagtatgatgcacgcattttcact	UA3	UB1	UC1	343245	341692	341692	S103, NA, S102, NA, S101, tatC, S100		new_343178_343239_-1, SAOUHSC_00330, new_342714_342787_-1, SAOUHSC_00329, new_342403_342463_-1, SAOUHSC_00328, new_341650_341745_-1
U131	1	343392	140	M3	1	SigA	1	aatcatattttttggtgtagatttgacaaataTAGTTGTCAAaaagacgcataTCATTTACAGTGTAATTAAGgagttgatgcgatgtgcgtaatcgattg	UA68	UB26	UC1	343392	345781	345781	NA, NA, NA, NA		SAOUHSC_00331, SAOUHSC_00332, SAOUHSC_00333, SAOUHSC_00334
U132	-1	347370	574	M3	0.925074925074925	SigA	0.996003996003996	cacctctccttccacttcatcgccaaatctgcCCCTATTCACtagaaaaaataAATAGTATACTTAGTAAATTaattacacatcttaaaggagttaaaatt	UA3	UB1	UC1	347370	346214	346214	ltrA		SAOUHSC_00335
U133	1	347618	413	M3	0.957042957042957	SigA	0.997002997002997	agaatttaattagagtcattacgcgaaatgattaatgataatTTGTGGTAAAtcaaagcataaTTTTGTACTATAGATGAGGAtgatagagcatatttaag	UA8	UB1	UC1	347618	349045	349045	S104, thl		new_347617_347865_1, SAOUHSC_00336
U134	-1	356261	1058	M2	0.568431568431568	SigB	0.568431568431568	aggtggtaccgcgaaacataagctttcgtCCTTTTtatccgattcattcGGGTACGAAggacggaagctttttttattttttcttataggagggtcttaat	UA69	UB5	UC5	356261	349121	349121	metI, metC, metH, metE, NA		SAOUHSC_00341, SAOUHSC_00340, SAOUHSC_00339, SAOUHSC_00338, SAOUHSC_00337
U135	-1	356694	1088	M3	0.999000999000999	SigA	0.999000999000999	aaacaaattaacttttaaatcaaaattttctgaataaTTGTTGACAAatctttttttaCTCTGTAAGCTAATTAATATcttataacagtttaatgaaacgt	UA6	UB5	UC5	356694	356278	349121	S106	metI, metC, metH, metE, NA	new_356286_356686_-1	SAOUHSC_00341, SAOUHSC_00340, SAOUHSC_00339, SAOUHSC_00338, SAOUHSC_00337
U136	1	356843	671	M3	0.999000999000999	SigA	1	gaaaaatgaattattttttaaataaagtgtggttaaTGGTTGTCTGactcatttagaATACATAAAATATATTTAACtgttgttatcaaataaaaagtgat	UA3	UB1	UC1	356843	360129	360129	NA, S107, NA, NA, ychF		SAOUHSC_00342, new_357749_357885_1, SAOUHSC_00344, SAOUHSC_00345, SAOUHSC_00346
U137	1	357749	639	M3	0.994005994005994	SigA	1	tgagaataattgaacaattaaatcgtagGTATGGTAAAtagttacacaaTTTTATATAATAACTCTTTGtgcaagtgtaaataaattgtaatcagtgaaca	UA3	UB1	UC1	357749	360129	360129	S107, NA, NA, ychF		new_357749_357885_1, SAOUHSC_00344, SAOUHSC_00345, SAOUHSC_00346
U138	1	360183	165	M3	0.958041958041958	SigA	0.962037962037962	gttaattaaatagtatatatgtagaagaggcggaatCAATTGTTCGcctcttttaattATGCGTATAATTTATTAAAAgaatggaataattttactcgcgt	UA70	UB26	UC1	-1	-1	-1
U139	-1	360413	1014	M3	0.969030969030969	SigA	1	attcatttgaaactttctatgatatttttaaaaataCACTTCACAAaagcgaacataTGTTCTATAATAGTTGTGAGgtggtaaggaatgaatttaaatat	UA71	UB37	UC5	360413	360052	360052	NA		SAOUHSC_00347
U140	1	360532	768	M3	0.983016983016983	SigA	0.999000999000999	attaatatcaaaaatgatatgaagagtagtttgaattaTTATTGTAAAaagtaatggcgCATGATATAATTCTTTATTGtgagtaatgaaaattattcctt	UA3	UB1	UC1	360532	361744	361744	S108, rpsF, ssb, rpsR		new_360532_360629_1, SAOUHSC_00348, SAOUHSC_00349, SAOUHSC_00350
U141	-1	360562	19	M1	0.977022977022977	NM	0.995004995004995	ttgcacctccttgtggtctatacggcttatcaatcttaaaacagataagcaaggaataattttCattactcacaataaagaattatatcatgcgccattac	UA72	UB22	UC8	-1	-1	-1
U142	-1	362011	949	M3	0.997002997002997	SigA	0.999000999000999	ctatcaaaagattttttatagctttagataaaaTTATTGACTTcaacagaccaaAAGTATAAACTATCTAGTGAggaaagagacttataggtctcgcgagt	UA73	UB38	UC1	362011	361973	361973
U143	1	365345	1319	M2	0.999000999000999	SigB	0.999000999000999	aacgaaagtaacgcatgacgattaatttaaaaatatttgtaataattATGAATAAaattaaaaacaagGGGTAATACaatctatatagcatataagctttt	UA74	UB13	UC3	365345	366623	366946	S110, NA, S111, S112	NA	new_365348_365422_1, SAOUHSC_00356, new_365996_366072_1, new_366074_366638_1	SAOUHSC_00358
U144	-1	366461	871	M3	0.995004995004995	SigA	1	atatacatttacattattttttctgccgaattcatAGCTTGATTAttttatgttatAGGACTAGAATATACACATAttattagagcatctttgaattttaa	UA75	UB1	UC1	366461	366138	366138	S113, NA		new_366397_366461_-1, SAOUHSC_00357
U145	1	366640	1367	M2	1	SigB	1	caattactacttttaaaaatatttggataaaaataatttgaatTTGTTTTAgaattgtaaataagGGGTACTACttagaataacgcaaaataaatagaaaa	UA76	UB7	UC3	366640	366946	366946	NA		SAOUHSC_00358
U146	1	367184	579	M3	0.526473526473527	SigA	0.537462537462537	aaaaaaaggatgacgttgggttgcgccatccaggagtattatgttcatgaatataaaagactgTGTAgtcatttaagaactacacccatatagtaacacat	UA3	UB1	UC1	367184	367677	367677	NA		SAOUHSC_00359
U147	-1	367220	418	M3	0.908091908091908	SigA	1	attaattcatattttaaattaatgactctaaaaataGTATTGTCTTtaatcaagtgaTGTGTTACTATATGGGTGTAgttcttaaatgactacacagtctt	UA77	UB1	UC1	367220	367158	367158
U148	-1	368448	421	M3	0.996003996003996	SigA	0.998001998001998	cttaaattctctatctatgccaaaattcccattagttgacgCATTTGACTAtatacctaacaTATTCCATACTTATATTGACtctataaacaaaggatgat	UA78	UB1	UC1	368448	368025	368025	NA		SAOUHSC_00360
U149	-1	369656	689	M4	0.979020979020979	SigA	1	ttcactgacagtatcttacatttgttaagatgctgttatttttttaTCCCgacataaaatCATGTTATGATAAACTTAAtatatacaacgagatgtgcgat	UA3	UB1	UC1	369656	368569	368569	NA, S114, NA		SAOUHSC_00363, new_369285_369356_-1, SAOUHSC_00362
U150	1	371900	14	M1	0.672327672327672	NM	0.684315684315684	atatcttcctcctaagaatttaagtatgaattagaactatcaattgattgcgcTTAattataataattctaatctcttagttagcattattacattttgat	UA72	UB22	UC8	371900	371961	371961
U151	-1	371935	1011	M3	0.951048951048951	SigA	0.978021978021978	ctttattttaaaagtaatcattcactttacaaagttatcCAGTTGACTAttctggatcaaAATGTAATAATGCTAACTAAgagattagaattattataatt	UA79	UB12	UC6	371935	369657	368569	S115, ahpC, ahpF	NA, S114, NA	new_371838_371935_-1, SAOUHSC_00365, SAOUHSC_00364	SAOUHSC_00363, new_369285_369356_-1, SAOUHSC_00362
U152	1	372284	126	M3	0.998001998001998	SigA	1	caattattaacttataagcaaaTAATTGCTATaaaaaagtttggACGTGTACAATTGCAATATGaagattttaaattaattgtaaagtatcgaggagtggg	UA80	UB26	UC1	372284	373083	373083	nfrA		SAOUHSC_00366
U153	-1	374609	97	M3	0.997002997002997	SigA	1	tcgaatttcatcatgtttacatttaattgcaaatgccCTCTTGAAATattttaaaattAATATTATTCTTAGCATACTagtcggaattatattcaaaaatt	UA37	UB20	UC1	374609	373159	373159	tcyP		SAOUHSC_00367
U154	-1	375299	1258	M3	0.879120879120879	SigA	0.973026973026973	tcaaactaatttgtttcaggttttttaattattcattatgattaatattgaATTttgaataaattttTAtagTATGTTACTTTTaaatgggatggcttctg	UA81	UB18	UC3	375299	373159	373159	S116, tcyP		new_374611_375299_-1, SAOUHSC_00367
U155	-1	375344	405	M1	0.746253746253746	NM	0.788211788211788	acaagctgatatactccattcaatatctactttgaagagagcataTCaaactaatttgtttCaggttttttaattattcattatgattaatattgaatttt	UA20	UB1	UC1	375344	374723	373193	S116	tcyP	new_374611_375299_-1	SAOUHSC_00367
U156	-1	376525	1039	M1	0.819180819180819	NM	0.854145854145854	acaataacgtttaaactatgtatgaagcaagactgacgtttcACTGCCcgtagacaaaCGTCAGtatacataaagtatatgcagaaaggactttaaagtat	UA82	UB10	UC5	376525	375420	375420	NA, S117		SAOUHSC_00369, new_375392_375529_-1
U157	-1	377290	1178	M4	0.743256743256743	SigA	1	ttttataccatttaaaagtttatgaacagtcTTTTAcagcaggcgatTATGCTATAATATTATTTAaattggggaggtgttcttatggaatttaaaaccat	UA9	UB6	UC4	377290	375437	375437	NA, S118, NA, S117		SAOUHSC_00370, new_376527_376603_-1, SAOUHSC_00369, new_375392_375529_-1
U158	-1	377867	1421	M2	0.997002997002997	SigB	0.997002997002997	acagagacgtttaatgcgaatgaagacttataacttaataatgtaaGGGTTTTActttataataagaaGGGTAAAAGattaaataaacaaatttttaaagg	UA12	UB7	UC3	377867	375437	375437	NA, S119, NA, S118, NA, S117		SAOUHSC_00371, new_377292_377364_-1, SAOUHSC_00370, new_376527_376603_-1, SAOUHSC_00369, new_375392_375529_-1
U159	1	377988	600	M3	0.97002997002997	SigA	1	acatttataaaactattaaaagattacctaagcagTTATTGAAAAaatgccgaaaaTTTGCTATTATCGTTAAATAatttacataaactcatataatctaa	UA3	UB1	UC1	377988	383232	383232	S120, xpt, pbuX, guaB, guaA		new_377988_378328_1, SAOUHSC_00372, SAOUHSC_00373, SAOUHSC_00374, SAOUHSC_00375
U160	-1	384260	1026	M3	0.968031968031968	SigA	1	aaagcaattaaagataaagttcttttcTAATTGAATTgtaatattacaTCTGATATAATTGATTTACAaattcccggtaaccattccggcttcattctctt	UA18	UB10	UC5	384260	383308	383308	S122, NA		new_383895_384260_-1, SAOUHSC_00376
U161	-1	386113	1062	M3	0.974025974025974	SigA	1	tattatttggtaacaataagaaaCTATTTACACaatatattttgTATAGTAAAATTATTTTATAatatttaaatccaattgcacaaggagtgattatcatg	UA83	UB5	UC5	-1	-1	-1
U162	-1	387864	1347	M3	0.793206793206793	SigA	0.984015984015984	gtcgacaataaatacagattagaattttttataaaatcaaatGTTTTGAAAAccatcaaataAGTATTATGTTATGTATATAaagattaggagatgaagtg	UA84	UB28	UC3	387864	386606	386606	NA, NA		SAOUHSC_00382, SAOUHSC_00381
U163	1	388485	1446	M2	1	SigB	1	ctattataataaaccaattttagagcgtaaaaatgtgacTGGATTTAaatatactgatgaGGGTAAACActatttagaagtcacagtagggcaacagcatt	UA12	UB7	UC3	388485	388944	388944
U164	1	394894	982	M4	0.953046953046953	SigA	0.991008991008991	tagtaattgtagggaagttaagcgataacatattgCTTAGCTTcttttttatTTTGTTATGATGAAAAAAGgagcgggtttatgatcaagtttttggaaaa	UA85	UB33	UC1	-1	-1	-1
U165	1	402428	384	M3	0.937062937062937	SigA	0.953046953046953	taaattacttaataatgattaatttttagttaaagtaagtTTAATGTGAAgcacgaccattgCTCATTATAATGAATGAGGAttgttcgtattgcgtaata	UA20	UB1	UC1	402428	404703	404703	S124, set15, NA		new_402428_402507_1, SAOUHSC_00399, SAOUHSC_00400
U166	-1	405167	1060	M4	0.883116883116883	SigA	0.992007992007992	tttaactatttattaaaaattattaaatcgacttaataaacgTAATTTtcttaatattcAGTGTTATGATGGAGTTACaatttttagaggagtgatagata	UA86	UB5	UC5	405167	404762	404762	NA		SAOUHSC_00401
U167	1	407190	1172	M3	0.925074925074925	SigA	1	ataaagttaaaatgaattacatgtattAAATTGAATAagttagttttgTTTGATAACATAAAAGTTGAataatcactattttaataagttgtatgaaatat	UA87	UB6	UC4	407190	410058	410058	S125, NA, NA, NA, NA		new_407190_407344_1, SAOUHSC_00405, SAOUHSC_00406, SAOUHSC_00407, SAOUHSC_00408
U168	-1	410590	1155	M3	0.971028971028971	SigA	0.997002997002997	ctttcgcaatcttcgataataaaaaaatagtatactTAATTAAATTattgagcgcttTACTTTATAATGGAGACAAAgatatatctcacgaaagagaatcg	UA88	UB21	UC4	410590	410151	410151	NA, S126		SAOUHSC_00409, new_410116_410342_-1
U169	1	410667	171	M3	0.999000999000999	SigA	1	tttaattaagtatactatttttttattatcgaAGATTGCGAAagaggaaacgcTCCTATATAATGTAAAACAGaattattcctatttacaaataaattgaa	UA89	UB14	UC1	410667	412795	412795	NA, S128, NA		SAOUHSC_00410, new_411925_412192_1, SAOUHSC_00411
U170	-1	410678	177	M3	0.958041958041958	SigA	0.999000999000999	actggaattttagccatatatataccctcacttcaattTATTTGTAAAtaggaataattcTGTTTTACATTATATAGGAGcgtttcctctttcgcaatctt	UA89	UB14	UC1	410678	410151	410151	NA, S126		SAOUHSC_00409, new_410116_410342_-1
U171	1	412540	1494	M1	0.881118881118881	NM	0.881118881118881	aaactaacaagactcacctcacatcaataaatcaacacaaagcaaagccacCATCCCtattggtataGTGGCctgagaattttaagtattcaattcgctta	UA90	UB23	UC9	412540	412642	412642
U172	1	413002	7	M1	0.998001998001998	NM	1	tgttcgattaagcttttgataactttaatgatgccagcgatGATACCCattaagattaCCTCCtttgcttatgagttaacttcattgtacatagttatctt	UA91	UB39	UC8	413002	413033	413033
U173	-1	413043	1306	M3	0.669330669330669	SigA	0.693306693306693	aataaaaaattcgcagttatgatcataacaattcaagttaggaaaaaaatcaattacgcacaagataaCTATGTACAATGAAGTTAACtcataagcaaagg	UA92	UB3	UC3	413043	411613	411613	S130, S129, S127		new_412576_413041_-1, new_412520_412574_-1, new_411586_412518_-1
U174	1	413217	378	M3	0.992007992007992	SigA	1	acaatcattggtttaatagaggttaagctcatgAATTTGACATgaagcagaaatTTAATTATATTTTATGTTATaagtttaaaacgaataacacgttaggt	UA57	UB1	UC1	413217	420360	420360	S131, ndhF, NA, S132, NA, S133, NA, NA		new_413220_413511_1, SAOUHSC_00412, SAOUHSC_00413, new_417715_417875_1, SAOUHSC_00414, new_418267_418920_1, SAOUHSC_00416, SAOUHSC_00417
U175	-1	418784	422	M3	0.982017982017982	SigA	0.998001998001998	accgacaatatcaaaattataaagttcatattgTTATGTATATtgcaaataaaaCATTGTATAATTGAAATAACaatattttgctattttcaatttagtac	UA78	UB1	UC1	418784	418345	418345	S134		new_418311_418466_-1
U176	1	420772	392	M3	0.585414585414585	SigA	0.998001998001998	ccgtattaatgaaacaattttgatgcaggtGTATTGCATGttatttacataCATGTTAGAGTGTTACTTAAacacgtagacgctttaacgctttaaaggag	UA20	UB1	UC1	420772	422060	422060	NA		SAOUHSC_00420
U177	1	422282	95	M3	1	SigA	1	aaaatttagtactggttctgaattaatcgaaacttagaTAATTGCAAAataacaaaatgTCGTTTATAATTCTTATCTGaaaagtaagaattaaaattgag	UA37	UB20	UC1	422282	424389	424389	S135, cysM, NA		new_422281_422375_1, SAOUHSC_00421, SAOUHSC_00422
U178	1	424666	1073	M3	0.988011988011988	SigA	0.993006993006993	taattttttagaaaattcggcaaattGTATTGACGAtatatgcaattTTACATATAATGCTCTTATTcctagtggattaataagaatttgtaggaggggcg	UA47	UB5	UC5	424666	427517	428724	NA, NA, NA, S136, S137	S138, sle1, S139	SAOUHSC_00423, SAOUHSC_00424, SAOUHSC_00426, new_427307_427446_1, new_427448_427532_1	new_427534_427608_1, SAOUHSC_00427, new_428636_428760_1
U179	1	427448	865	M4	0.684315684315684	SigA	0.97002997002997	atattatgaaattgtaataatttagatattgtaaaatctaataagttgtaataatttTAAGGGATAATTATAAAATttgatgatacagtatatgatttttt	UA75	UB1	UC1	427448	427534	428724	S137	S138, sle1, S139	new_427448_427532_1	new_427534_427608_1, SAOUHSC_00427, new_428636_428760_1
U180	1	427534	863	M4	0.855144855144855	SigA	0.985014985014985	agtatatgatttttttgtaatcataatgtcatcaaacatcaacctattatacataataaAATCGTATAATGATGTAGTattcataaattcggataaaagaa	UA75	UB1	UC1	427534	428724	428724	S138, sle1, S139		new_427534_427608_1, SAOUHSC_00427, new_428636_428760_1
U181	1	429159	891	M4	0.897102897102897	SigA	0.994005994005994	tatgaaaagttgggtgcgctgaattgctaacgttttgcgctataactactcataTATGATAACATAATTGTACagtataatttgaaaaattgatttcacaa	UA75	UB1	UC1	429159	430118	430118	NA, NA		SAOUHSC_00429, SAOUHSC_00430
U182	-1	429167	453	M4	0.744255744255744	SigA	1	acatttaatcatctttgacaccccaactttgtgaaatcaatttttcaaattatactgtacaatTATGTTATCATATATGAGTagttatagcgcaaaacgtt	UA93	UB1	UC1	429167	428800	428800	S140, NA		new_429068_429167_-1, SAOUHSC_00428
U183	-1	432183	601	M3	0.996003996003996	SigA	0.997002997002997	attttcgttttacacttagcagtaataTCTTTGAAAAtaaaaaattaaGGGCGTATAATCACCATATTaattcattcatagaattggggttttgtttttga	UA3	UB1	UC1	432183	430262	430262	NA, NA		SAOUHSC_00433, SAOUHSC_00431
U184	-1	433201	1049	M4	0.801198801198801	SigA	0.999000999000999	atctgttcaatatataaaatagaagatattcatctaaaaaaTAGAACATTtatcaataatATTGCTATAATAGTTACAAaacactcatttttggaggtgcc	UA94	UB40	UC5	433201	433135	433135
U185	1	433278	1082	M3	0.999000999000999	SigA	1	ctattttttagatgaatatcttctattttatATATTGAACAgataaatttttTAGATTATAGTAATTATCATtaataactaatatcagaatattctaaaaa	UA6	UB5	UC5	433278	439672	439672	gltB, gltD, S141		SAOUHSC_00435, SAOUHSC_00436, new_439313_439580_1
U186	1	440108	91	M3	0.869130869130869	SigA	0.994005994005994	ataattgtgacaaaataaaaatattttgttgaaaGCCTTTACATaacttgtctagaCAAGTTATACTCGTTTTAAGacattaagggagtgaaatatatggc	UA95	UB36	UC1	440108	440301	440301	treP		SAOUHSC_00437
U187	1	443055	806	M3	0.482517482517482	SigA	0.941058941058941	ctattttctatacgtatcaaaaattaatacaattaagacatacgCATGATATTATTACGTATGgagacattgtgccacgttttatggatcatgatcattta	UA3	UB1	UC1	443055	443650	443650	treR		SAOUHSC_00439
U188	1	444078	1471	M3	0.846153846153846	SigA	1	gtataaagtaaacaatgatataaatgatttaTACTTGCAATtaactattaaaaTATAGTAATATATATCTTGCcgtgctaggtggggaggtagcggttccc	UA96	UB7	UC3	444078	448461	448461	S142, NA, S143, NA, S144, dnaX, NA, recR, S145, NA		new_444078_444397_1, SAOUHSC_00440, new_444585_444666_1, SAOUHSC_00441, new_445192_445283_1, SAOUHSC_00442, SAOUHSC_00444, SAOUHSC_00445, new_448024_448171_1, SAOUHSC_00446
U189	1	444585	980	M3	0.905094905094905	SigA	0.975024975024975	aatgatttttgtgtcaatgaaaagtaagaagttataatttgatgataaagaaaTGATGGTGAAatgagggggagTATCTTACAATAGAATTATTaatgaga	UA67	UB33	UC1	444585	447968	447985	S143, NA, S144, dnaX, NA, recR		new_444585_444666_1, SAOUHSC_00441, new_445192_445283_1, SAOUHSC_00442, SAOUHSC_00444, SAOUHSC_00445
U190	1	446990	163	M3	1	SigA	1	aactgtacatgtgatagatgaagagtgaTACATGACAAgcgatataatcGTATGTATAATGAAAGAAACatcattttattgataaatatttattgattttc	UA97	UB26	UC1	446990	448478	448478	NA, recR, S145, NA		SAOUHSC_00444, SAOUHSC_00445, new_448024_448171_1, SAOUHSC_00446
U191	1	448579	396	M3	0.999000999000999	SigA	0.999000999000999	cgttcagtacagatgacaaaggtgtaatttttaCTGTTGTTAAgcagtttgaaaGCCTGTATAGTATTTATTTGttgaggcaaacaaaacaactcaactta	UA20	UB1	UC1	448579	448835	448852	S146, S147		new_448579_448651_1, new_448653_448818_1
U192	1	448653	764	M3	0.813186813186813	SigA	0.884115884115884	ttgaggcaaacaaaacaactcaacttaagaaatAACTTGAATTactaacgaaaatTAATTTTAAAAAGTTATTGacttaaatgttaataaaatgtataatt	UA3	UB1	UC1	448653	448886	448886	S147		new_448653_448818_1
U193	1	454666	515	M4	0.871128871128871	SigA	0.998001998001998	tattatacaatagacaagctattgcataagtaacACTAACTTttgtcaaagaAGTGTTACTATATAATTAAtacttttgaaagtaactaattccaaaacag	UA3	UB1	UC1	454666	454734	454734
U194	1	456587	757	M3	0.977022977022977	SigA	0.977022977022977	tcaagaagatttaaagtttcacgaaaaagTAATTGAAGGttaccaagaaaTCATTCATAATGAATCACAAcggttcaaaagcgttaatgcagatcaacctc	UA3	UB1	UC1	456587	459885	472856	NA, S148, holB, NA, NA, S149, NA	NA, rsmI, S150, metS, NA, S151, rnmV, ksgA, S152, veg, S153, ipk, purR, yabJ, S154, spoVG, S155, NA, glmU, S156, prs, S157, rplY	SAOUHSC_00452, new_457044_457343_1, SAOUHSC_00454, SAOUHSC_00455, SAOUHSC_00456, new_459352_459624_1, SAOUHSC_00457	SAOUHSC_00458, SAOUHSC_00459, new_461433_461716_1, SAOUHSC_00461, SAOUHSC_00462, new_464505_464660_1, SAOUHSC_00463, SAOUHSC_00464, new_466102_466173_1, SAOUHSC_00465, new_466540_466773_1, SAOUHSC_00466, SAOUHSC_00467, SAOUHSC_00468, new_468858_468928_1, SAOUHSC_00469, new_469303_469420_1, SAOUHSC_00470, SAOUHSC_00471, new_470928_471073_1, SAOUHSC_00472, new_472040_472188_1, SAOUHSC_00474
U195	1	456682	155	M4	0.892107892107892	SigA	1	aacctcttgaaaatgttgttgaagacacgtatcaaactatcatCaaatatttagaaaagaTATGATATAATTGTTAGAAgaggtgttataaaatgaaaatg	UA98	UB26	UC1	456682	466175	472856	NA, S148, holB, NA, NA, S149, NA, NA, rsmI, S150, metS, NA, S151, rnmV, ksgA, S152	veg, S153, ipk, purR, yabJ, S154, spoVG, S155, NA, glmU, S156, prs, S157, rplY	SAOUHSC_00452, new_457044_457343_1, SAOUHSC_00454, SAOUHSC_00455, SAOUHSC_00456, new_459352_459624_1, SAOUHSC_00457, SAOUHSC_00458, SAOUHSC_00459, new_461433_461716_1, SAOUHSC_00461, SAOUHSC_00462, new_464505_464660_1, SAOUHSC_00463, SAOUHSC_00464, new_466102_466173_1	SAOUHSC_00465, new_466540_466773_1, SAOUHSC_00466, SAOUHSC_00467, SAOUHSC_00468, new_468858_468928_1, SAOUHSC_00469, new_469303_469420_1, SAOUHSC_00470, SAOUHSC_00471, new_470928_471073_1, SAOUHSC_00472, new_472040_472188_1, SAOUHSC_00474
U196	1	466175	1065	M3	0.773226773226773	SigA	1	caaagcactattgttaaaatttaaatttTGTTTGACGAaaacgttgcaaaTATGGTATTATGTAACTTGTagcgaggtggagcaatatgccaaaatcaatt	UA83	UB5	UC5	466175	469337	472856	veg, S153, ipk, purR, yabJ, S154, spoVG	S155, NA, glmU, S156, prs, S157, rplY	SAOUHSC_00465, new_466540_466773_1, SAOUHSC_00466, SAOUHSC_00467, SAOUHSC_00468, new_468858_468928_1, SAOUHSC_00469	new_469303_469420_1, SAOUHSC_00470, SAOUHSC_00471, new_470928_471073_1, SAOUHSC_00472, new_472040_472188_1, SAOUHSC_00474
U197	-1	466183	20	M1	0.987012987012987	NM	0.994005994005994	gacaatcaatagaatttttgatgtccaaaattgattttggcatattGCTCCACctcgctacaaGTTACataataccatatttgcaacgttttcgtcaaaca	UA72	UB22	UC8	-1	-1	-1
U198	-1	466523	1490	M1	0.961038961038961	NM	0.963036963036963	atcagtgttaaacattttgtaaataaaaagagtattgaacataatGCCCAACactcaaataATTATCataatatttacttcttatactaagaaacgtctaa	UA40	UB23	UC9	466523	466217	466217
U199	1	468314	1407	M2	1	SigB	1	agggctggtggctctattaatggtgttatgaatttaatgaatGAGTTTAAagcccatgtaaaagGGGTATCAGtacttgtagaatcaaaagaagttaaaca	UA12	UB7	UC3	468314	469541	472856	yabJ, S154, spoVG, S155, NA	glmU, S156, prs, S157, rplY	SAOUHSC_00468, new_468858_468928_1, SAOUHSC_00469, new_469303_469420_1, SAOUHSC_00470	SAOUHSC_00471, new_470928_471073_1, SAOUHSC_00472, new_472040_472188_1, SAOUHSC_00474
U200	1	469547	538	M3	0.989010989010989	SigA	0.991008991008991	aaaaacaatgccttttatATGTTGAAAGagtattgcagatTAAATTATAATAATGACGAAgtgtaaaatttaatgggggttaatgttcatgcgaagacacg	UA3	UB1	UC1	469547	472856	472856	glmU, S156, prs, S157, rplY		SAOUHSC_00471, new_470928_471073_1, SAOUHSC_00472, new_472040_472188_1, SAOUHSC_00474
U201	1	472941	287	M3	0.506493506493506	SigA	0.985014985014985	acaagcactgtgcttattttaatataagcatggtgcttttTGTGTTATTATAAAGCTTAAttaaactttattactttgtactaaagtttaattaattttag	UA99	UB1	UC1	472941	482223	485487	S158, pth, mfd, NA, NA, NA, NA, NA, S159, tilS	hpt, S160, S161, ftsH	new_472941_473152_1, SAOUHSC_00475, SAOUHSC_00477, SAOUHSC_00479, SAOUHSC_00480, SAOUHSC_00481, SAOUHSC_00482, SAOUHSC_00483, new_481117_481229_1, SAOUHSC_00484	SAOUHSC_00485, new_483136_483224_1, new_483226_483391_1, SAOUHSC_00486
U202	1	480670	952	M3	0.966033966033966	SigA	0.999000999000999	aatccaaattgattcaaaattatccgagtatagACATTGTGAAaaaatccaaacAAGGATATAATAAGGGAAAAtcgaatcaaatcgggaggatttattta	UA100	UB38	UC1	480670	482223	487697	NA, S159, tilS	hpt, S160, S161, ftsH, S162, hslO, S163, cysK	SAOUHSC_00483, new_481117_481229_1, SAOUHSC_00484	SAOUHSC_00485, new_483136_483224_1, new_483226_483391_1, SAOUHSC_00486, new_485515_485713_1, SAOUHSC_00487, new_486645_486773_1, SAOUHSC_00488
U203	1	482229	707	M4	0.973026973026973	SigA	1	agtagtaagaaagcacaattcagtattaatctcacggataaaTGGATAATTcaaatcgcaTATGGTAAATTAATAATAAtggctaaaaataatggcgatac	UA3	UB1	UC1	482229	487663	487697	hpt, S160, S161, ftsH, S162, hslO, S163, cysK		SAOUHSC_00485, new_483136_483224_1, new_483226_483391_1, SAOUHSC_00486, new_485515_485713_1, SAOUHSC_00487, new_486645_486773_1, SAOUHSC_00488
U204	1	483226	480	M3	0.879120879120879	SigA	0.927072927072927	tgcgtttgagaaataatagtgtagactcaaaaatatgaaaaatgtattTCATATATATTTAATTTTAGacaagacatatgtcttgaaaagttgaaaaatat	UA3	UB1	UC1	483226	485504	487612	S161, ftsH	S162, hslO, S163, cysK	new_483226_483391_1, SAOUHSC_00486	new_485515_485713_1, SAOUHSC_00487, new_486645_486773_1, SAOUHSC_00488
U205	-1	485495	1508	M1	0.845154845154845	NM	0.864135864135864	tattttcaaaaacgataaaagtacctctttctataactttATcatagaaagaggtaCtgaatataatcgattatttattgtctgggtgatttggatcgtaa	UA101	UB41	UC9	485495	485359	485359
U206	1	485512	968	M4	0.526473526473527	SigA	0.992007992007992	accttacgatccaaatcacccagacaataaataatcgatTAtattcagtacctctttCTATGATAAAGTTATAGAAAgaggtacttttatcgtttttgaaa	UA102	UB33	UC1	485512	487663	487697	S162, hslO, S163, cysK		new_485515_485713_1, SAOUHSC_00487, new_486645_486773_1, SAOUHSC_00488
U207	1	486645	1398	M2	0.999000999000999	SigB	0.999000999000999	gtttagcgtaatttaatttaaatcaatacgctaaaATGTTTATttttagcggtttaGTGAAATGTagaactaaatagttgtataatccttagtgattttgt	UA12	UB7	UC3	486645	487697	487697	S163, cysK		new_486645_486773_1, SAOUHSC_00488
U208	1	487833	555	M4	0.967032967032967	SigA	0.999000999000999	tttttaaaaatatgagcgttaaattaaacatttttctgataaaaatatccagtgAATGATAAGATAATAAACGtacatactaataactagtaaatagcagg	UA3	UB1	UC1	487833	492083	493120	folP, folB, folK, S164, NA, lysS, S165, S166, S167		SAOUHSC_00489, SAOUHSC_00490, SAOUHSC_00491, new_489542_489934_1, SAOUHSC_00492, SAOUHSC_00493, new_491610_491883_1, new_491885_491996_1, new_491998_492098_1
U209	1	491885	397	M4	0.527472527472527	SigA	0.956043956043956	atcttaatcagctataaaagtactttaaaattgtatagaatgtgtATGGTTTTgtacatatgtgTATGATAGAATACTAAAAGtgttatgaattagagggc	UA20	UB1	UC1	491885	493120	493120	S166, S167		new_491885_491996_1, new_491998_492098_1
U210	1	491998	938	M3	1	SigA	1	agttttgaagaataaaaaagttgattaaaaGTGTTGACTTtatcaattgaaTGAAGTAATATATAAAAGTCgtcaaaaacagacgaaacacactaaaagct	UA103	UB38	UC1	491998	493086	493103	S167		new_491998_492098_1
U211	1	492100	1502	M3	0.792207792207792	SigA	0.792207792207792	atgtgacaaagtttacatcaaagtgtaaaattaaCTATTGCACCttattaattaaGCGTGTATCATGAATAAGTAagttattttgtctggtgactatagca	UA104	UB41	UC9	492100	493120	493120
U212	-1	500089	139	M3	0.999000999000999	SigA	0.999000999000999	aattttactcattatacataaaaccccttttcAAGTTGATTAaatacattgtaATGTATAAACTGATATTTAAaaaggtacaaaataagataaatttagga	UA68	UB26	UC1	-1	-1	-1
U213	1	500095	102	M3	0.983016983016983	SigA	0.997002997002997	ttttataactgacctcctaaatttatcttattttgtACCTTTTTAAatatcagtttaTACATTACAATGTATTTAATcaacttgaaaaggggttttatgta	UA105	UB42	UC1	500095	501620	501620	NA, NA		SAOUHSC_00499, SAOUHSC_00500
U214	1	503048	1336	M3	0.88011988011988	SigA	0.994005994005994	gataatcccaattagaatatgcatatatttctcatTCCTTTAGTTttttctacaatcTATCATACAATAAAATGGAAgggctaacatcataaatttttgaa	UA106	UB8	UC3	503048	503116	519827	S168	ctsR, S169, NA, NA, clpC, S170, S171, S172, radA, NA, S173, S174, gltX, S175, S176, cysE, cysS, NA, NA, NA, S177, sigH, S178, S179, secE, nusG, S180, rplK, S181, rplA	new_503048_503123_1	SAOUHSC_00502, new_503631_503726_1, SAOUHSC_00503, SAOUHSC_00504, SAOUHSC_00505, new_507717_507908_1, new_507910_508021_1, new_508023_508196_1, SAOUHSC_00507, SAOUHSC_00508, new_510630_511036_1, new_511038_511185_1, SAOUHSC_00509, new_512705_512985_1, new_512987_513062_1, SAOUHSC_00510, SAOUHSC_00511, SAOUHSC_00512, SAOUHSC_00513, SAOUHSC_00514, new_516770_516849_1, SAOUHSC_00515, new_517420_5174…
U215	-1	503054	817	M3	0.736263736263736	SigA	0.996003996003996	tttttcaattaatttgtttttatattttcaaaaatttATGATGTTAGcccttccatttTATTGTATGATAGATTGTAGaaaaaactaaaggaatgagaaat	UA3	UB1	UC1	503054	501798	501798	nupC		SAOUHSC_00501
U216	1	503125	1245	M3	1	SigA	1	gggctaacatcataaatttttgaaaatataaaaacaaatTAATTGAAAAaggtcaaaataGGTCATATAATATAGTCAAAgaaggtcaaaaaggggtgata	UA107	UB43	UC3	503125	513469	519980	ctsR, S169, NA, NA, clpC, S170, S171, S172, radA, NA, S173, S174, gltX, S175, S176, cysE	cysS, NA, NA, NA, S177, sigH, S178, S179, secE, nusG, S180, rplK, S181, rplA	SAOUHSC_00502, new_503631_503726_1, SAOUHSC_00503, SAOUHSC_00504, SAOUHSC_00505, new_507717_507908_1, new_507910_508021_1, new_508023_508196_1, SAOUHSC_00507, SAOUHSC_00508, new_510630_511036_1, new_511038_511185_1, SAOUHSC_00509, new_512705_512985_1, new_512987_513062_1, SAOUHSC_00510	SAOUHSC_00511, SAOUHSC_00512, SAOUHSC_00513, SAOUHSC_00514, new_516770_516849_1, SAOUHSC_00515, new_517420_517494_1, new_517496_517696_1, SAOUHSC_00516, SAOUHSC_00517, new_518477_518656_1, SAOUHSC_00518, new_519080_519286_1, SAOUHSC_00519
U217	-1	507680	1498	M1	0.525474525474525	NM	0.529470529470529	gttcaatgctactaaaaaaacagcccaaaactttaatttgttttggactgttttataatTATGCTTGCgatggtgttttagtttctgaagtttgttcagca	UA90	UB23	UC9	507680	507459	507459
U218	1	507910	137	M3	0.972027972027972	SigA	0.995004995004995	aaggtatgaatttttataaaggtttttTGTTTGAAGAtactagcaactTACGTCAAAATAAAATAGGTctatataatattgtgataaatctagagaaaaga	UA68	UB26	UC1	507910	520031	534515	S171, S172, radA, NA, S173, S174, gltX, S175, S176, cysE, cysS, NA, NA, NA, S177, sigH, S178, S179, secE, nusG, S180, rplK, S181, rplA, S182	S183, rplJ, rplL, S184, NA, S185, rpoB, S186, rpoC, NA, S187, rpsL, rpsG, S188, fusA, S189, tuf	new_507910_508021_1, new_508023_508196_1, SAOUHSC_00507, SAOUHSC_00508, new_510630_511036_1, new_511038_511185_1, SAOUHSC_00509, new_512705_512985_1, new_512987_513062_1, SAOUHSC_00510, SAOUHSC_00511, SAOUHSC_00512, SAOUHSC_00513, SAOUHSC_00514, new_516770_516849_1, SAOUHSC_00515, new_517420_517494_1, new_517496_517696_1, SAOUHSC_00516, SAOUHSC_00517, new_518477_518656_1, SAOUHSC_00518, new_51908…	new_520056_520250_1, SAOUHSC_00520, SAOUHSC_00521, new_521163_521284_1, SAOUHSC_00523, new_521969_522300_1, SAOUHSC_00524, new_525712_525874_1, SAOUHSC_00525, SAOUHSC_00526, new_529863_529959_1, SAOUHSC_00527, SAOUHSC_00528, new_530910_531031_1, SAOUHSC_00529, new_533114_533329_1, SAOUHSC_00530
U219	1	508023	64	M4	0.571428571428571	SigA	0.999000999000999	attattaagattttatctttgaaagataccgacTATCAACAtgatgtaagttTATTTTATAATATTCATAAAaaataaatctggtaaaacagtttgcgtta	UA35	UB19	UC7	508023	512687	521221	S172, radA, NA, S173, S174, gltX	S175, S176, cysE, cysS, NA, NA, NA, S177, sigH, S178, S179, secE, nusG, S180, rplK, S181, rplA, S182, S183, rplJ, rplL, S184	new_508023_508196_1, SAOUHSC_00507, SAOUHSC_00508, new_510630_511036_1, new_511038_511185_1, SAOUHSC_00509	new_512705_512985_1, new_512987_513062_1, SAOUHSC_00510, SAOUHSC_00511, SAOUHSC_00512, SAOUHSC_00513, SAOUHSC_00514, new_516770_516849_1, SAOUHSC_00515, new_517420_517494_1, new_517496_517696_1, SAOUHSC_00516, SAOUHSC_00517, new_518477_518656_1, SAOUHSC_00518, new_519080_519286_1, SAOUHSC_00519, new_519980_520054_1, new_520056_520250_1, SAOUHSC_00520, SAOUHSC_00521, new_521163_521284_1
U220	1	511038	907	M4	0.899100899100899	SigA	0.957042957042957	aacagctttctatttaaaatttaagcatattacccagggaatTATGTTATGATTAAACAATgaaattattttaaggtcatgttaaaaagcattgtttcgtt	UA108	UB1	UC1	511038	521102	534515	S174, gltX, S175, S176, cysE, cysS, NA, NA, NA, S177, sigH, S178, S179, secE, nusG, S180, rplK, S181, rplA, S182, S183, rplJ, rplL	S184, NA, S185, rpoB, S186, rpoC, NA, S187, rpsL, rpsG, S188, fusA, S189, tuf	new_511038_511185_1, SAOUHSC_00509, new_512705_512985_1, new_512987_513062_1, SAOUHSC_00510, SAOUHSC_00511, SAOUHSC_00512, SAOUHSC_00513, SAOUHSC_00514, new_516770_516849_1, SAOUHSC_00515, new_517420_517494_1, new_517496_517696_1, SAOUHSC_00516, SAOUHSC_00517, new_518477_518656_1, SAOUHSC_00518, new_519080_519286_1, SAOUHSC_00519, new_519980_520054_1, new_520056_520250_1, SAOUHSC_00520, SAOUHSC_0…	new_521163_521284_1, SAOUHSC_00523, new_521969_522300_1, SAOUHSC_00524, new_525712_525874_1, SAOUHSC_00525, SAOUHSC_00526, new_529863_529959_1, SAOUHSC_00527, SAOUHSC_00528, new_530910_531031_1, SAOUHSC_00529, new_533114_533329_1, SAOUHSC_00530
U221	1	512705	1350	M3	0.949050949050949	SigA	1	atagacaagatcaaggtagtataTACTTGAATTttataacgtaaCCACATATGATAAAGTTGTAttaacaaattacaacaatatgaataaagtattttata	UA48	UB28	UC3	512705	520048	534515	S175, S176, cysE, cysS, NA, NA, NA, S177, sigH, S178, S179, secE, nusG, S180, rplK, S181, rplA, S182	S183, rplJ, rplL, S184, NA, S185, rpoB, S186, rpoC, NA, S187, rpsL, rpsG, S188, fusA, S189, tuf	new_512705_512985_1, new_512987_513062_1, SAOUHSC_00510, SAOUHSC_00511, SAOUHSC_00512, SAOUHSC_00513, SAOUHSC_00514, new_516770_516849_1, SAOUHSC_00515, new_517420_517494_1, new_517496_517696_1, SAOUHSC_00516, SAOUHSC_00517, new_518477_518656_1, SAOUHSC_00518, new_519080_519286_1, SAOUHSC_00519, new_519980_520054_1	new_520056_520250_1, SAOUHSC_00520, SAOUHSC_00521, new_521163_521284_1, SAOUHSC_00523, new_521969_522300_1, SAOUHSC_00524, new_525712_525874_1, SAOUHSC_00525, SAOUHSC_00526, new_529863_529959_1, SAOUHSC_00527, SAOUHSC_00528, new_530910_531031_1, SAOUHSC_00529, new_533114_533329_1, SAOUHSC_00530
U222	1	517496	552	M3	0.968031968031968	SigA	1	tgaattgaattataacgtgttacttactgatggtttgaCATTTGTTAtaaattttatgTATAGTATACTGGTATTATAatgaataaaggtgaattattgtg	UA3	UB1	UC1	517496	529534	534515	S179, secE, nusG, S180, rplK, S181, rplA, S182, S183, rplJ, rplL, S184, NA, S185, rpoB, S186, rpoC	NA, S187, rpsL, rpsG, S188, fusA, S189, tuf	new_517496_517696_1, SAOUHSC_00516, SAOUHSC_00517, new_518477_518656_1, SAOUHSC_00518, new_519080_519286_1, SAOUHSC_00519, new_519980_520054_1, new_520056_520250_1, SAOUHSC_00520, SAOUHSC_00521, new_521163_521284_1, SAOUHSC_00523, new_521969_522300_1, SAOUHSC_00524, new_525712_525874_1, SAOUHSC_00525	SAOUHSC_00526, new_529863_529959_1, SAOUHSC_00527, SAOUHSC_00528, new_530910_531031_1, SAOUHSC_00529, new_533114_533329_1, SAOUHSC_00530
U223	1	520056	776	M3	0.998001998001998	SigA	1	ttacaggctgaaagaaatatctttcagtctgtaaaaatATATTGACAAtaagtaatttcCAAGTTATATTACTTATTGTgattattttacctaagacagta	UA3	UB1	UC1	520056	534515	534515	S183, rplJ, rplL, S184, NA, S185, rpoB, S186, rpoC, NA, S187, rpsL, rpsG, S188, fusA, S189, tuf		new_520056_520250_1, SAOUHSC_00520, SAOUHSC_00521, new_521163_521284_1, SAOUHSC_00523, new_521969_522300_1, SAOUHSC_00524, new_525712_525874_1, SAOUHSC_00525, SAOUHSC_00526, new_529863_529959_1, SAOUHSC_00527, SAOUHSC_00528, new_530910_531031_1, SAOUHSC_00529, new_533114_533329_1, SAOUHSC_00530
U224	-1	520090	85	M3	0.561438561438561	SigA	0.902097902097902	cgttcaagtcaattttagcctcggcaggataaattttaagttatAAATAActcctactgtcTTAGGTAAAATAATCACAATaagtaatataacttggaaat	UA109	UB44	UC1	-1	-1	-1
U225	1	521286	960	M4	0.91008991008991	SigA	0.998001998001998	tttgagaagttaaaaccccgttattttgataacggggttttattcatttaaagactgagtgaAATGTTATAATTATAATGAcgagttacaaagtgaagatg	UA110	UB33	UC1	521286	534515	534515	NA, S185, rpoB, S186, rpoC, NA, S187, rpsL, rpsG, S188, fusA, S189, tuf		SAOUHSC_00523, new_521969_522300_1, SAOUHSC_00524, new_525712_525874_1, SAOUHSC_00525, SAOUHSC_00526, new_529863_529959_1, SAOUHSC_00527, SAOUHSC_00528, new_530910_531031_1, SAOUHSC_00529, new_533114_533329_1, SAOUHSC_00530
U226	1	521969	166	M3	0.998001998001998	SigA	1	taaaggatattacattctgagaagtataaaAGCTTGAAATgaaatggatatTCTGTTATAGTTATATAATGtaaaaatttatgttcaataagtgtgtactt	UA70	UB26	UC1	521969	534515	534549	S185, rpoB, S186, rpoC, NA, S187, rpsL, rpsG, S188, fusA, S189, tuf		new_521969_522300_1, SAOUHSC_00524, new_525712_525874_1, SAOUHSC_00525, SAOUHSC_00526, new_529863_529959_1, SAOUHSC_00527, SAOUHSC_00528, new_530910_531031_1, SAOUHSC_00529, new_533114_533329_1, SAOUHSC_00530
U227	1	529554	763	M4	0.571428571428571	SigA	0.999000999000999	gctttagcctcttgttatttttatgtaaattatttgatttaatgtTGACGAattctcttgttcAATGTTAATATATTAAAGGttgatgcaagcagaacttt	UA3	UB1	UC1	529554	534549	534549	NA, S187, rpsL, rpsG, S188, fusA, S189, tuf		SAOUHSC_00526, new_529863_529959_1, SAOUHSC_00527, SAOUHSC_00528, new_530910_531031_1, SAOUHSC_00529, new_533114_533329_1, SAOUHSC_00530
U228	-1	529576	11	M1	0.975024975024975	NM	0.978021978021978	ttaaagcgtgcaactttttccttagacaataatttatCCTCcaaagttctgcttGCatcaacctttaatatattaacattgaacaagagaattcgtcaaca	UA72	UB22	UC8	-1	-1	-1
U229	-1	534548	1510	M1	1	NM	1	tctaaatcgaatagccattacaaaatttacacattaaaaaaaGACCCCTCgattgagggATCTTCtttttatataaaatctaagaaattagaaattattta	UA101	UB41	UC9	534548	534268	534268
U230	-1	536010	760	M4	0.862137862137862	SigA	0.999000999000999	cttatcattcatagataaaatatctcaaagcaatcattTAGTACGATaatttcataaAATGTTATACTATAAACATtattttagaaagtagtgataagggt	UA3	UB1	UC1	536010	534761	534761	NA		SAOUHSC_00531
U231	1	536096	1180	M3	0.975024975024975	SigA	1	gattgctttgagatattttatctatgaatgataaGGCTTTCAAGttatgtagaatTACTGTATGATAAAGGTATTaccaaacaatacttaagggggattat	UA9	UB6	UC4	536096	537303	537303	kbl		SAOUHSC_00532
U232	1	537543	1260	M3	0.838161838161838	SigA	0.842157842157842	aaattcattttgattatttttgataatgagcatttTAATAGTAATacatgtttataGTGTGTAGTATATGTCTATActagtagtaactatatagagaaagt	UA111	UB18	UC3	537543	538459	538459	hchA		SAOUHSC_00533
U233	1	538545	88	M3	0.979020979020979	SigA	0.998001998001998	ttagaggagcctcatatgtaaatgtatgagggctcttttTTTTGGCAAAatttaagtgatACTTGTAAAATAGAACCTATtatgagtatgatttaagaaaa	UA112	UB45	UC1	-1	-1	-1
U234	1	540401	1126	M3	0.819180819180819	SigA	1	tttccatttacagaaatatcagcaacatgtacatgtcATATATACAAgaaagcgctttTATATTATAATTATTATGAAaatgaatattatgtccgcttgtg	UA113	UB16	UC4	540401	541638	543763	S191, NA, S192	S193, ilvE, NA, S194, NA	new_540401_540482_1, SAOUHSC_00535, new_541513_541650_1	new_541652_541782_1, SAOUHSC_00536, SAOUHSC_00537, new_543006_543108_1, SAOUHSC_00538
U235	1	541652	525	M3	0.997002997002997	SigA	0.999000999000999	gtaaagtatattagtaaaacacagatTACTTGTCTCtgtgaaattaatACGTTTATACTAAAAGATATagtctttctagaaatctgttaattaattttgaa	UA3	UB1	UC1	541652	543814	543814	S193, ilvE, NA, S194, NA		new_541652_541782_1, SAOUHSC_00536, SAOUHSC_00537, new_543006_543108_1, SAOUHSC_00538
U236	1	545191	464	M3	0.545454545454545	SigA	0.999000999000999	gatttacctacgccaataggaccttcaattgctataaaaggtTTGTTCATATtcacatctccaAATGTTAAAATAGACATTGAgtattgtaccataagtga	UA3	UB1	UC1	545191	547299	547299	tadA, S196, NA, NA		SAOUHSC_00541, new_545752_545863_1, SAOUHSC_00542, SAOUHSC_00543
U237	1	545752	288	M3	0.554445554445554	SigA	0.998001998001998	gagccaataagaaatccaccaattagacgatAGTACAtactaattaaaaTTTGTTAGAATTACATTATAtgataaattaatgacaatataaatgttaatag	UA99	UB1	UC1	545752	547316	547316	S196, NA, NA		new_545752_545863_1, SAOUHSC_00542, SAOUHSC_00543
U238	-1	545760	722	M3	0.956043956043956	SigA	0.999000999000999	agaatatatactcagcgcacatacttttctattaACATTTATATtgtcattaattTATCATATAATGTAATTCTAacaaattttaattagtatgtactatc	UA3	UB1	UC1	545760	543924	543924	S195, NA, NA		new_545181_545760_-1, SAOUHSC_00540, SAOUHSC_00539
U239	-1	546172	377	M3	0.985014985014985	SigA	0.989010989010989	tatgtaaatgtctaaatctctttgtggatCTTCAGTATAaatcgcacgacTCGTGTATACTTGATAATAAatacctgcatcttttaaaacatttgtaattt	UA57	UB1	UC1	-1	-1	-1
U240	1	547674	366	M3	0.716283716283716	SigA	1	aataacattgtaaaataaagaaaaataattaaaGTATTGCACTttattgaaattTATATTACGATAGTAATGCAgaaatttatatatgcaaaatattatat	UA60	UB1	UC1	547674	549968	549968	sdrC		SAOUHSC_00544
U241	1	551033	367	M3	0.78021978021978	SigA	0.999000999000999	ataacgttttacgataaagaaaaataattaaaGTATTGTGCTttatctaaaaaTGTAATACTATATTGATATAcatttttgtatttaaaacaattgtatta	UA60	UB1	UC1	551033	555153	555153	S197, sdrD		new_551039_551104_1, SAOUHSC_00545
U242	1	555226	331	M3	0.999000999000999	SigA	0.999000999000999	ccaggtccttgtggcctggtttttttataattaCACATGCAATagatgtattttTCATATAAAATAAACAATAAagatacggaataaaacttatatgaggc	UA1	UB1	UC1	555226	556734	556734	NA		SAOUHSC_00547
U243	-1	558400	1199	M4	0.965034965034965	SigA	1	caaaatttgttgttttataaataaacacatcttccagttaaaagaagtaattaaatattaTGTGATATAATTATAAAAAatagatataagtggtgttgtaa	UA46	UB6	UC4	558400	556878	556878	NA		SAOUHSC_00548
U244	-1	560620	741	M3	0.852147852147852	SigA	0.997002997002997	acccttcatgaaaattaatttataaataattgagcaatcGTATACAATTatcgaatagttTTTAGTAAAATAGAAAGATAaacacattgatagtgtaagga	UA3	UB1	UC1	560620	558646	558646	NA, NA, folE2		SAOUHSC_00551, SAOUHSC_00550, SAOUHSC_00549
U245	1	560786	133	M4	0.765234765234765	SigA	0.994005994005994	taaaaatcaaaaatttgttggaatttgaaaagtgttaaacattaaaaatGATGCTATATTAATGGTGTatgaatgaattcataagtttttaaaatgtatta	UA114	UB26	UC1	560786	562854	562854	nagB, hxlA, hxlB		SAOUHSC_00552, SAOUHSC_00553, SAOUHSC_00554
U246	1	561647	1399	M2	0.998001998001998	SigB	0.998001998001998	catgtcgatgaaatggattgattgcaATGTTTAAttaagaaatgcctcGGGAAAGGTtccaatagaaagataaaaagcattggaaggatgatttttagtgg	UA12	UB7	UC3	561647	562837	562837	hxlA, hxlB		SAOUHSC_00553, SAOUHSC_00554
U247	1	562946	856	M3	0.947052947052947	SigA	1	atgatgcctaggcagaaatattatcgattatTTTTTTATTTaaataataaatTATAGTATAATATCAATAATaaacgaataggggtgttaatattgaagtt	UA3	UB1	UC1	562946	563840	563840	NA, S198		SAOUHSC_00555, new_563627_563884_1
U248	1	563262	1027	M2	0.999000999000999	SigB	0.999000999000999	gacatacatatcaatctattgaaaAGGACTATatttatgaatttgcGGGTATAACtgaagccattacaagtttgtataaccaagggaaaaaacttttcgtg	UA18	UB10	UC5	563262	563653	563653
U249	1	563985	1453	M2	1	SigB	1	agttaatcgttcgatgatttaagaattattaTTGTTTAAttcaaatgtatgaGGGTATAAAatcattgaatttaattcgataaagcgaaatttttgaacaa	UA12	UB7	UC3	563985	565540	565540	S200, proP		new_563993_564092_1, SAOUHSC_00556
U250	1	564094	79	M5	0.653346653346653	NM	0.685314685314685	ttgtatttatataaaagtttaaattcttataaatttgacaaaactaattaactccgtataattatgaaacatacaagagggagtgtatgaattcatggatt	UA115	UB46	UC1	564094	565540	565540	proP		SAOUHSC_00556
U251	1	565693	1488	M1	0.983016983016983	NM	0.992007992007992	aataaagtttttgtatatacataaacCCCCACtgcaatgattaTCGCAatgggggaaagaggggacttaaagcatatgtttagctttgaatacttaaaatt	UA40	UB23	UC9	565693	565846	565846
U252	1	565778	1481	M1	0.569430569430569	NM	0.597402597402597	ttgaatacttaaaattctcttgctattgaaatgttaggatgtaaatatgtcttagagtattttgtccaacgcaattaatattgagactctaaccttcaata	UA116	UB47	UC10	565778	565846	565846
U253	-1	565927	1111	M3	0.867132867132867	SigA	0.984015984015984	ctattataaaaatcaaacttaagccctagataaatttgatactgtagtACCAtgttttttattagataaGACGTTACTATATGTATATAgagaaaagaagt	UA117	UB48	UC4	565927	563933	563933	S201, S199		new_565660_565922_-1, new_563888_565658_-1
U254	1	566021	205	M3	0.917082917082917	SigA	0.997002997002997	agggcttaagtttgatttttataataggcaggttTACCTGATAAaaatacttattCATTATATAATGTTAACAATatgtattttaaagtttacattgagtg	UA118	UB49	UC1	566021	569943	569943	vraA, vraB, vraC, NA, S204		SAOUHSC_00557, SAOUHSC_00558, SAOUHSC_00559, SAOUHSC_00560, new_569584_570066_1
U255	1	569584	204	M4	0.702297702297702	SigA	0.968031968031968	cataaactggtgcgccttcatggtgatactgtcgataaataatcataACCTatattacctccTTTGCTACTCTATGGTTATattataaataacatttttat	UA118	UB49	UC1	569584	569960	569960	S204		new_569584_570066_1
U256	-1	569619	1110	M3	0.997002997002997	SigA	0.997002997002997	taaatcatacgttctatgtctgataaaaagttgatacttaaggTTGATGTCACacataaaaatgTTATTTATAATATAACCATAgagtagcaaaggaggta	UA117	UB48	UC4	569619	568455	568455	NA, S203, S202		SAOUHSC_00561, new_569253_569401_-1, new_568427_569190_-1
U257	-1	570951	830	M3	0.413586413586414	SigA	0.757242757242757	gaatgattcatttcaacaatcatcaaatattgaatgcttaatatttttcaattaggttaaAAATGATATGATGAATACAAtattattatgtaggagtgaag	UA3	UB1	UC1	570951	570053	570053	thiD		SAOUHSC_00562
U258	1	571065	644	M4	0.977022977022977	SigA	1	atcattcatactattgtaacttttgaaaatgtcattCACTTTAGataagtgtgaTATGTTAAAATATGTCCTGaggtgagattgaatggaatggtcgcaaa	UA3	UB1	UC1	571065	572680	572680	ung, NA, S206, NA, S207		SAOUHSC_00564, SAOUHSC_00565, new_572128_572259_1, SAOUHSC_00567, new_572629_572714_1
U259	1	572716	906	M2	0.881118881118881	SigB	0.881118881118881	actaaacattaaatttttaataaaaataatcaagaaaaAGAGTTAcaaactcatcttttGGGTATAGAataccttcgaggtgagtttttatttatggaaaa	UA119	UB1	UC1	572716	574499	574499	NA		SAOUHSC_00569
U260	1	575826	1467	M2	0.9000999000999	SigB	0.9000999000999	aagtataaaaaggaaaaattattgaaaaaaattcgacaaaaatATGTTTCAaatatttcaaataGGTTAAAATaatattagttaaccattacaaaaattgt	UA27	UB7	UC3	575826	576080	576080	S210, S211		new_575825_575970_1, new_575972_576116_1
U261	-1	575867	1029	M3	0.430569430569431	SigA	0.796203796203796	taactactatcactacatataaacgttaacctcaatagaaattatacagtcgctaCTCTATACAATTTTTGTAatggttaactaatattattttaacctat	UA18	UB10	UC5	575867	574303	574303	S209, NA, NA, S208		new_575491_575867_-1, SAOUHSC_00572, SAOUHSC_00571, new_574271_574374_-1
U262	-1	576955	449	M4	0.973026973026973	SigA	1	ttatttcataatgccacgtcaccaatttgtaatcataatttTATCGTTACccctttgcttTATGATAAAATTTATAAAGaactgatgatttttgaaaagga	UA93	UB1	UC1	576955	576139	576139	ywfI		SAOUHSC_00573
U263	1	577026	784	M3	0.999000999000999	SigA	1	gtaacgataaaattatgattacaaattggtgACGTGGCATTatgaaataaaaTGGCGTATAATTATACCGTGaatgattaataagatttatattacaggag	UA3	UB1	UC1	577026	578885	578885	eutD, S212, NA		SAOUHSC_00574, new_578060_578133_1, SAOUHSC_00575
U264	1	578936	624	M1	0.582417582417582	NM	0.612387612387612	aaatgatagatcaaatgcaatagttaaatatttaacagCCCCTTtcaagttatcGTTtggggctgttatttttgaaagtatccataaaaagcataaatatg	UA3	UB1	UC1	578936	582965	582982	S213, S214, mvaK1, mvaD, mvaK2, S215, NA		new_578936_579087_1, new_579089_579484_1, SAOUHSC_00577, SAOUHSC_00578, SAOUHSC_00579, new_582581_582658_1, SAOUHSC_00580
U265	1	579089	962	M2	0.962037962037962	SigB	0.962037962037962	atggaaataataaatttaataagaaaatttcatgttttaCGTATTAaatagattgagaataGGGTATATAtaatgcgtatgactatgaaagaaacgacctt	UA120	UB33	UC1	579089	582982	582982	S214, mvaK1, mvaD, mvaK2, S215, NA		new_579089_579484_1, SAOUHSC_00577, SAOUHSC_00578, SAOUHSC_00579, new_582581_582658_1, SAOUHSC_00580
U266	1	580891	1327	M2	0.998001998001998	SigB	0.998001998001998	ctgcgtcgcgtagtatttatggTGGATTTGcagaatgggaaaaaGGGTATAGTgatgagacgtcatatgccgttccacttgaatcgaatcattttgaagat	UA13	UB8	UC3	580891	582455	582455	mvaK2		SAOUHSC_00579
U267	1	582581	507	M3	1	SigA	1	agataaatgctccattttttattgtcagccgtgttacgtATCTTGAAAAaaatattaaaAAGAGTAAAATAGATAGAGTtaacgaaaaaattaatgaaatc	UA3	UB1	UC1	582581	582982	582982	S215, NA		new_582581_582658_1, SAOUHSC_00580
U268	-1	584844	409	M3	0.978021978021978	SigA	0.98001998001998	taaccacacctaattcaacacttttcaaacataaGTATTGACACattgagcaaaaTGATTTTTAATTGTAACTAAtacagttacaattatgaggtgagaaa	UA20	UB1	UC1	584844	584129	584129	NA, NA		SAOUHSC_00582, SAOUHSC_00581
U269	1	585246	1173	M4	0.871128871128871	SigA	0.999000999000999	aaattaaaatattgaaagataatttttattgattaattgcgaatatacaaagaCACcattatatccaTATGCTAAAATAAGAAAAAaggcgacatgttatc	UA87	UB6	UC4	585246	591550	591550	S216, NA, S217, NA, S218, NA, S219, NA, NA, NA, NA, NA, NA		new_585246_585425_1, SAOUHSC_00584, new_586836_586907_1, SAOUHSC_00585, new_587466_587590_1, SAOUHSC_00586, new_588233_588391_1, SAOUHSC_00587, SAOUHSC_00588, SAOUHSC_00589, SAOUHSC_00591, SAOUHSC_00592, SAOUHSC_00593
U270	1	597380	716	M4	0.992007992007992	SigA	0.999000999000999	aaattgaatagacaatcattgtttattaagtattgagcaagtTGTGGTATAATGCCGTTATtaaaacttgttaataaggggagaaagtcatgttcaaggta	UA3	UB1	UC1	597380	599761	599761	NA, NA, NA		SAOUHSC_00605, SAOUHSC_00606, SAOUHSC_00607
U271	1	599987	51	M3	0.986013986013986	SigA	1	taactgacacatttttttgatcatagCTATATACTTtgtgaattaattCACATTATAATAAGAGTGAAgataagagtattataaattatctttaaataaat	UA43	UB25	UC7	599987	601325	601325	S221, adh		new_599987_600267_1, SAOUHSC_00608
U272	1	601505	719	M4	1	SigA	1	tggaattgttaattaattgaacctatttagctttaagaaggcaTAACAAGATgaccttatttTATGCTATAATATTTCTATtatgcgaagattaaggtgag	UA3	UB1	UC1	601505	603620	603620	S222, NA, argS		new_601505_601585_1, SAOUHSC_00610, SAOUHSC_00611
U273	1	604728	603	M3	1	SigA	1	tagatgagtttatatgaaatataaaaaataatttaCTATTTTCTTttagtatgtggACTTATATAATAAATAGAAGcatataaagaaaaaaacagttgttt	UA3	UB1	UC1	604728	605898	605898	S223, NA		new_604728_605089_1, SAOUHSC_00613
U274	1	606017	705	M4	0.953046953046953	SigA	1	tacatgtttgagataaggggtttttaaaatatatttagtgaatgaTAGCAACGCgagtatgtgATTGCTATAATGAATGTAAttatcgatgaaagaaaaga	UA3	UB1	UC1	606017	608652	609196	NA, NA, NA	NA	SAOUHSC_00614, SAOUHSC_00615, SAOUHSC_00616	SAOUHSC_00617
U275	1	607037	1170	M4	0.923076923076923	SigA	1	ttttacatgctaatatctcagtcgaaacggTTACACTAGcacacgacaTTTGCTAAAATAAAAATAActataaacataaagagggcataagcgatggattt	UA121	UB6	UC4	607037	609281	610063	NA, NA, NA	S224, NA	SAOUHSC_00615, SAOUHSC_00616, SAOUHSC_00617	new_609298_609376_1, SAOUHSC_00618
U276	1	608595	1405	M2	0.999000999000999	SigB	0.999000999000999	gcatttatcaacaaacatcacgatgaaaagcATGTTTAAtttttagtgataaGTGAAATATaaaagtagtaattattatttgtaatataattgtaatatga	UA12	UB7	UC3	608595	610063	610063	NA, S224, NA		SAOUHSC_00617, new_609298_609376_1, SAOUHSC_00618
U277	1	608662	1372	M4	0.565434565434565	SigA	0.992007992007992	agtaattattatttgtaatataattgtaatatgacTGTTGTTttagaaatgatTGTTGTATAATGGTTGTGAGcacaagacgatataaataaaaggagaga	UA122	UB7	UC3	608662	610063	610080	NA, S224, NA		SAOUHSC_00617, new_609298_609376_1, SAOUHSC_00618
U278	1	609298	919	M3	0.975024975024975	SigA	0.994005994005994	ccgacaagttaaatcgcaaTACTTGTCGGttattttattaCATGGCATAATACAGTGAATattaatttttatgatttgcgaaggggaaattaaaccaatac	UA123	UB1	UC1	609298	610080	610080	S224, NA		new_609298_609376_1, SAOUHSC_00618
U279	1	610227	1433	M2	1	SigB	1	tggtaatttataaataatttaaaaaaattgtttataaaatggaAGCGTATatagaatgaaggttGGGTATATAgtttattgagggaggtgtcacaatgaat	UA12	UB7	UC3	610227	611219	611219	NA, S225		SAOUHSC_00619, new_611051_611555_1
U280	-1	612105	1403	M2	0.992007992007992	SigB	0.992007992007992	ctgagaattactaaattaaaaaaattataaaaatttttcatttttAGTGATAaaattctgaaaaatGGGTATAAAtagtagaagaagttaacttggaagag	UA12	UB7	UC3	612105	611176	611176	S227, sarA, S226		new_611676_612105_-1, SAOUHSC_00620, new_611136_611266_-1
U281	-1	612394	630	M4	0.695304695304695	SigA	0.998001998001998	aatgttattttttaataatttacaccaaattaaTAGCAAAaattatgttattCGTGCTAATATTTCATAGTtggttattcaattaattaaaaataagtcaa	UA3	UB1	UC1	612394	611176	611176	S228, S227, sarA, S226		new_612107_612394_-1, new_611676_612105_-1, SAOUHSC_00620, new_611136_611266_-1
U282	-1	612577	410	M4	0.503496503496504	SigA	0.995004995004995	ttaagattattttaaattaacttttagcttatcattttaACTTGTAATtatttttaaaAGTGATAAGCTATTTTTTTGtggtctaaaaatctttagaaaag	UA20	UB1	UC1	612577	612111	611176	S229, S228	S227, sarA, S226	new_612396_612570_-1, new_612107_612394_-1	new_611676_612105_-1, SAOUHSC_00620, new_611136_611266_-1
U283	-1	613605	859	M3	0.543456543456543	SigA	0.999000999000999	aataatgtcctgtttttttcaacattattgtaaatgagTTGTATAttttctctaTAATGATAATGTAAATATATgattttattattaactttggaaagtga	UA124	UB1	UC1	613605	612808	612808	NA		SAOUHSC_00621
U284	1	614279	1020	M2	1	SigB	1	atcgaaacaaaataataaaatggctaattttattttctATGTTTAAaatctataaaaaaGGCAATAGAtatatgtaactaaaatataatatagctatgatt	UA125	UB10	UC5	614279	620807	620807	S230, NA, mnhA, mnhB, mnhC, mnhD, mnhE, S231, mnhG		new_614279_614349_1, SAOUHSC_00624, SAOUHSC_00625, SAOUHSC_00626, SAOUHSC_00627, SAOUHSC_00628, SAOUHSC_00629, new_620054_620305_1, SAOUHSC_00632
U285	1	620942	1197	M4	0.791208791208791	SigA	0.999000999000999	ataagttaatgttgttatgtgaaagcaagttgttTATTTatacaaacaattAGTGATAAAATAAAATTAAataattgcaaatttaagtactgcaatcgtag	UA126	UB6	UC4	620942	623153	623153	S232, NA		new_620943_621142_1, SAOUHSC_00633
U286	-1	624469	179	M1	0.731268731268731	NM	0.85014985014985	aacctaaaatattggtatctccaatattttaggccacacatcaacataacaaagtcgaaggctaatagtcccatatcgtgcgttaaatatatattaccctc	UA127	UB14	UC1	624469	623229	623229	S234, S233		new_623357_624469_-1, new_623187_623355_-1
U287	-1	627140	180	M3	0.998001998001998	SigA	0.999000999000999	ctttcacctcacatacattgtctatattatatcacgaattTACTTGACATgataaatattctCAGTTTATTATACAATTAATtaggttagcctaaactttt	UA127	UB14	UC1	627140	623195	623195	mntA, mntB, mntC, S234, S233		SAOUHSC_00637, SAOUHSC_00636, SAOUHSC_00634, new_623357_624469_-1, new_623187_623355_-1
U288	1	627159	336	M4	0.807192807192807	SigA	0.999000999000999	taaaagtttaggctaacctaattaattgtataataaactgagaatattTATCATGTcaagtaaattCGTGATATAATATAGACAAtgtatgtgaggtgaaa	UA128	UB1	UC1	627159	629664	629664	mntR, S235, tagA		SAOUHSC_00638, new_627875_628913_1, SAOUHSC_00640
U289	-1	628729	994	M3	0.982017982017982	SigA	0.989010989010989	attaaaattagtttaactaaggtaagtctaaagtCTAACGCTATtgatgccaataTCATTTATAATAAGTGATAAgcaaactttaaattaatatcttatat	UA129	UB50	UC1	628729	628023	628023	NA		SAOUHSC_00639
U290	1	630565	916	M3	0.904095904095904	SigA	0.986013986013986	acatttttaatgtttaccgaaacgttcatttgtagACCTTCCTTAttcacatttatcTAGATTATAATATACTACTCaacagttgttaaattttaaaacct	UA123	UB1	UC1	630565	630599	631687		S237, S238, tagG		new_630614_630733_1, new_630735_630879_1, SAOUHSC_00642
U291	1	630614	727	M3	0.993006993006993	SigA	0.998001998001998	catttatctagattataatatactactcaaCAGTTGTTAAattttaaaaccTGTTGTAAAGTGTATAGAAGattttgttattatcagagtgggtgttttga	UA3	UB1	UC1	630614	631687	631704	S237, S238, tagG		new_630614_630733_1, new_630735_630879_1, SAOUHSC_00642
U292	1	630735	979	M3	0.902097902097902	SigA	1	tgataacaatgatatttaaaaactaaacTTATTTCAACttacatgattgTATACTATAATGTATTTGTAataaactaatattttaaagaactagacaataa	UA67	UB33	UC1	630735	631704	631704	S238, tagG		new_630735_630879_1, SAOUHSC_00642
U293	-1	630825	1212	M3	0.776223776223776	SigA	1	tgacattccattaaaccacactttcaaatgtttaacTATTTCTCTActtaactaaatAGTATTATAATAATTGTTGTaaatactatcactatacatggatg	UA130	UB6	UC4	630825	629757	629757	S236, tagH		new_630534_630825_-1, SAOUHSC_00641
U294	1	631750	1345	M3	0.998001998001998	SigA	1	taatatatttatatgacgaaaccccgctaaccattaatAAATGGAAGTggggttcatttTTGTTTATAATTTAAGTAAAtaacatattaagttggtgtatt	UA131	UB8	UC3	631750	634458	634458	tagB, tagX, tagD		SAOUHSC_00643, SAOUHSC_00644, SAOUHSC_00645
U295	1	635993	1280	M4	0.592407592407592	SigA	0.999000999000999	aaaataaagttttctgcagttaatttgaaaaataatgcaaataTATTACGTgtgtagctaaaGGTGTTATAATGTTTGTACGaagagcaaacttactcaaa	UA36	UB3	UC3	635993	638147	639796	S240, abcA, S241	S242, NA	new_635993_636245_1, SAOUHSC_00647, new_637974_638071_1	new_638164_638331_1, SAOUHSC_00648
U296	-1	636047	958	M3	0.945054945054945	SigA	0.974025974025974	gatagaatatttctattgcatTTTTTGTAATaacttctcaaaGTCTTTATATTAAAACATGAaaattaatcgcttttgagtaagtttgctcttcgtacaaa	UA132	UB33	UC1	-1	-1	-1
U297	-1	636109	508	M4	0.975024975024975	SigA	0.998001998001998	ccaacaaaactttaaaaatcaaataaagtgttgccccaaaatACCGCTCataacatttaTATGATAGAATATTTCTATtgcattttttgtaataacttctc	UA3	UB1	UC1	636109	634534	634534	S239, pbp4		new_635826_636047_-1, SAOUHSC_00646
U298	1	638164	815	M3	0.845154845154845	SigA	1	ttacgacataataattcttaaattaatgaaatcgATATTTTAAGaaaaaaatgctCATGGTATAATACAAGTTATaagcaaacatacatatattaaatact	UA3	UB1	UC1	638164	639796	639796	S242, NA		new_638164_638331_1, SAOUHSC_00648
U299	1	639847	903	M1	0.788211788211788	NM	0.831168831168831	aggtacagtcatagtacttcgagcaaaatttgttttgttattataaaCAACACaaaggagataACTTCtctattgaagaagttaaaaacattatagcagac	UA133	UB1	UC1	-1	-1	-1
U300	-1	639878	1107	M3	0.928071928071928	SigA	1	caatataataattaaaaatattctgaattttTAATTTACTTtcatttcattgTCTGCTATAATGTTTTTAACttcttcaatagagaagttatctcctttgt	UA134	UB51	UC5	639878	639685	639685	S243		new_639727_639872_-1
U301	1	640045	886	M4	0.697302697302697	SigA	0.998001998001998	aatagtaaatctttgttagaactctttccatagagTTGTGACAGcatttttgtTGTGCTACTATTTTTATAGtctaataaatatataaaggggatggtttc	UA75	UB1	UC1	640045	640918	640918	NA		SAOUHSC_00651
U302	1	641089	184	M3	0.754245754245754	SigA	1	tgacaaatcgagctatccaatttaaaaagtaaTGTTAGTCAAtaagattgaaaAATGTTATAATGATGTTCATgataatcattatcaattgggatgtcttt	UA25	UB14	UC1	641089	644046	644046	S244, fhuA, fhuB, fhuG		new_641088_641200_1, SAOUHSC_00652, SAOUHSC_00653, SAOUHSC_00654
U303	1	644244	1287	M3	0.711288711288711	SigA	0.996003996003996	atcaaaaatatatttgataacggtatcaggttaattctttaTGATAGCGCAttcatttattcTGTTTTATACTATGACTGATaataccaaggaggtacaac	UA36	UB3	UC3	644244	646817	648398	NA, NA, NA, NA	S245, NA	SAOUHSC_00655, SAOUHSC_00656, SAOUHSC_00658, SAOUHSC_00659	new_646848_647302_1, SAOUHSC_00660
U304	1	646294	893	M4	0.763236763236763	SigA	1	gttaaaatttactaataatgaaaaatgtaaacctttttcaaATGAAACtttataaaaaaTATGATAGTATATATGTAAatgtttaataaaatctggagaaa	UA75	UB1	UC1	646294	650302	650302	NA, S245, NA, S246, NA, S247, S248, NA		SAOUHSC_00659, new_646848_647302_1, SAOUHSC_00660, new_648432_648520_1, SAOUHSC_00661, new_649565_649805_1, new_649807_649892_1, SAOUHSC_00662
U305	1	648432	729	M3	0.888111888111888	SigA	0.894105894105894	atcatatgagggatatccgaaactttacaattgaatcactttgttttaaccttaaaagcaattcgTCtctactcttatcgggcgaattgctttttatattt	UA3	UB1	UC1	648432	650302	650302	S246, NA, S247, S248, NA		new_648432_648520_1, SAOUHSC_00661, new_649565_649805_1, new_649807_649892_1, SAOUHSC_00662
U306	1	649807	1169	M4	0.792207792207792	SigA	1	tgaacctgaaaataactttttacaactaaattgTCGAAAAacagtgtgtaCATGATATAATAAATTTATaaattgaaaagaattcaaaagaaaaattaaaa	UA121	UB6	UC4	649807	650302	650302	S248, NA		new_649807_649892_1, SAOUHSC_00662
U307	1	650522	254	M4	0.989010989010989	SigA	1	gtaatgtattaggtaaccattaaattcgttgttatACGATTCTgatacaagatTATGATAAAATAGCTTTAAttaagaattttagccatcatatagtcatc	UA135	UB1	UC1	650522	653702	656558	S250, S251, graX, graR, graS	S252, vraF, vraG	new_650523_651082_1, new_651084_651148_1, SAOUHSC_00664, SAOUHSC_00665, SAOUHSC_00666	new_653796_653938_1, SAOUHSC_00667, SAOUHSC_00668
U308	1	651084	306	M3	0.771228771228771	SigA	1	taatatgggccataaaaagcctccagtattttgAAATTTTAaaacatttgctaCTATTATAATATATATGTAActaaaaggtggagtaatatgttttttgg	UA1	UB1	UC1	651084	656558	656558	S251, graX, graR, graS, S252, vraF, vraG		new_651084_651148_1, SAOUHSC_00664, SAOUHSC_00665, SAOUHSC_00666, new_653796_653938_1, SAOUHSC_00667, SAOUHSC_00668
U309	-1	651089	159	M4	0.772227772227772	SigA	0.993006993006993	tctaaaatactcctttaaactgtaaccaaaaaacatattactCCACCTtttagttacataTATATTATAATAGTAGCAAatgttttaaaatttcaaaatac	UA44	UB26	UC1	651089	650395	650395	NA, S249		SAOUHSC_00663, new_650371_650529_-1
U310	-1	656124	1239	M1	0.947052947052947	NM	0.956043956043956	cttcacttcttgtttcaatagatttatcaactttatttttcgcttttTCtaatgctaaagCATCttttttatgtttcaaatcgaatccaaattgagagacg	UA136	UB52	UC2	656124	656073	656073
U311	1	656829	311	M4	0.753246753246753	SigA	0.996003996003996	ggtgatgcttttaattgaaaagattaacaggattcaactTTGTAAAttgtattaaaTGTGAGAAAATAAAAGTATattcattgagagatatatgagtcaat	UA1	UB1	UC1	656829	658938	658938	S253, NA, NA		new_656830_657303_1, SAOUHSC_00669, SAOUHSC_00670
U312	1	659273	379	M3	0.967032967032967	SigA	0.992007992007992	cctaaattgtattgggctttatttaatataAATTTGTATAtgtagacgaaaAAGCGTAAAATACTGGTATAacaaattaaatcattatatagtcaacttag	UA57	UB1	UC1	659273	660383	661488	S254	S256, NA, S257	new_659278_660399_1	new_660401_660689_1, SAOUHSC_00672, new_661335_662030_1
U313	1	660401	369	M3	0.895104895104895	SigA	0.986013986013986	cttaaaattatgttttactacttttaaaaattattaagacaatTTAtatagtaaattaagttttCGTTTTATATTACGATTTCCatattatcaaaaataag	UA60	UB1	UC1	660401	664650	664650	S256, NA, S257, NA, S258, sarX		new_660401_660689_1, SAOUHSC_00672, new_661335_662030_1, SAOUHSC_00673, new_664182_664260_1, SAOUHSC_00674
U314	-1	660427	864	M4	0.986013986013986	SigA	0.993006993006993	aaaatgttaataatattacaagataataacaaaccacacaaagctacttattTTTGATAATATGGAAATCGtaatataaaacgaaaacttaatttactata	UA75	UB1	UC1	660427	659524	659524	S255, NA		new_660330_660425_-1, SAOUHSC_00671
U315	1	664276	950	M3	0.854145854145854	SigA	0.979020979020979	ttgttggtaattttgacaacgtattaaaaacaaatgAGAAAGACAAtggctgaaaaaTTTAAGATAATAATGACAGAagcattgtctttatatatttgggg	UA73	UB38	UC1	664276	664548	664548	sarX		SAOUHSC_00674
U316	1	664826	785	M3	1	SigA	1	tttgaagaaatcgtagttcaataatgttaattgtgaaaATGTATATAAacataaaaaaaTCATGTATAATATATGTTGTtaattaaacagttcgaaagcga	UA3	UB1	UC1	664826	669920	669920	NA, NA, NA, S259, NA, S260, NA, NA, NA, NA		SAOUHSC_00675, SAOUHSC_00676, SAOUHSC_00677, new_666312_666417_1, SAOUHSC_00678, new_667063_667177_1, SAOUHSC_00679, SAOUHSC_00680, SAOUHSC_00681, SAOUHSC_00682
U317	1	666312	290	M3	0.53046953046953	SigA	0.999000999000999	aatgtgtgtactatctaattaatattgtctattttAAGTAAAttgaagcgagtTGTAGTAAAATAATAATAAAtattttcatatgattaacaaaaactata	UA1	UB1	UC1	666312	669937	669937	S259, NA, S260, NA, NA, NA, NA		new_666312_666417_1, SAOUHSC_00678, new_667063_667177_1, SAOUHSC_00679, SAOUHSC_00680, SAOUHSC_00681, SAOUHSC_00682
U318	1	670787	1042	M2	0.988011988011988	SigB	0.988011988011988	agtacttttcattgttacttaagcgctcctttaaaaATGTTTAAttccaaattaaaaTGGAAATGAttttatagtattaataaggtcaatcatatcatatt	UA137	UB10	UC5	670787	670906	670906
U319	-1	670811	749	M3	0.512487512487512	SigA	0.991008991008991	tcctcattttcctctccaatattaatcgTTATATTtatgcgtttaaTATGATATGATTGACCTTATtaatactataaaatcatttccattttaatttggaa	UA3	UB1	UC1	670811	670081	670081	S261, NA		new_670739_670812_-1, SAOUHSC_00683
U320	1	671337	466	M4	0.806193806193806	SigA	0.998001998001998	gtcatgtgaaaatgtataaagatattgattagaatTAGGATTATgttgctaattCATGTTAAAATTAAAAAAGatttaatgacgttaaggagttttatatg	UA3	UB1	UC1	671337	672827	672827	NA, S262, NA, S263, NA		SAOUHSC_00685, new_671824_671907_1, SAOUHSC_00686, new_672208_672286_1, SAOUHSC_00687
U321	1	671824	1040	M2	1	SigB	1	atcataatcgaattgcttacttgttatagatgaaaggtacaGCGTTTTAaaccttattttaaGGGTATGTAttaattaaaatgtggtcatgattgaaacag	UA137	UB10	UC5	671824	672827	672827	S262, NA, S263, NA		new_671824_671907_1, SAOUHSC_00686, new_672208_672286_1, SAOUHSC_00687
U322	1	672878	406	M1	0.918081918081918	NM	0.942057942057942	cttcgaaagtgaaaaatttatacataagcgtaacaaaCACCCCTaacattgtttAGCTGAtgataacaatattaggggtgtttgtttattttttaacctta	UA20	UB1	UC1	672878	672963	672963
U323	-1	674681	1321	M2	1	SigB	1	aaaaaacatctgaaatacttaatagtgattcactactatcaTCGTTTATattgatgtatcataGGGTATGTAaaattaataaagtaattatggaggcaaga	UA74	UB13	UC3	674681	672903	672903	NA, NA, NA		SAOUHSC_00690, SAOUHSC_00689, SAOUHSC_00688
U324	-1	675742	838	M4	0.649350649350649	SigA	1	tacatctttagtctagtattataactataacTAGCATGTCtttaaatgaaTATGCTATCATGATATGGTAattttgatatttaaataaattaaattgagta	UA3	UB1	UC1	675742	674773	674773	uppP		SAOUHSC_00691
U325	1	675876	275	M3	0.966033966033966	SigA	0.999000999000999	ttttacatgtaaaactacaatattttattgagctatTTAATTTGATtttaaggaaaaCCTTTTATAATAGGTTTAGGtgatataattgtgaaaaaattaac	UA99	UB1	UC1	675876	678981	678981	NA, NA		SAOUHSC_00692, SAOUHSC_00693
U326	1	679117	1160	M4	0.986013986013986	SigA	0.998001998001998	aattgttgctacacacgatttaactttattgtcacgttttgagACCATCATtgtgatgataAATGGTAAAATAGTTGAAAagggaaactatcaacaattac	UA138	UB53	UC4	679117	679202	679202
U327	1	680052	83	M5	0.724275724275724	NM	0.807192807192807	gaatataaaatgaaaaataataaagatgaaaaaataagaatatccataattaacggatttttgggtagtggtaaaaccacgttactgacacattatattag	UA139	UB46	UC1	680052	682245	682245	S267, NA, NA		new_680928_681029_1, SAOUHSC_00696, SAOUHSC_00697
U328	-1	680095	591	M3	0.875124875124875	SigA	0.963036963036963	atatcaaaagtaccgaattcattcatgatgattttaattttCTCATCATTTtttaataattcACTAATATAATGTGTCAGTAacgtggttttaccactacc	UA3	UB1	UC1	680095	679261	679261	S266, mgrA, S264		new_679775_680094_-1, SAOUHSC_00694, new_679227_679330_-1
U329	1	682501	1174	M4	0.524475524475524	SigA	0.997002997002997	tacaaaatatttcgataaaattgtgtattttgcataaattaaaaatgtatgttttaaaaaATTGTTATAATTAAATTAAGattaaacaaaggggtgactgt	UA140	UB6	UC4	682501	685594	685594	NA, S268, NA		SAOUHSC_00698, new_684097_684181_1, SAOUHSC_00699
U330	-1	687251	521	M3	0.837162837162837	SigA	0.994005994005994	ttgctacatttgacaatattttttctttgtAATTATCACTattttccatttAATTGTATAATTAATGACATattaaaataaaggggattgatcatatgaaa	UA3	UB1	UC1	687251	685755	685755	NA, S270, NA, NA		SAOUHSC_00702, new_686609_686793_-1, SAOUHSC_00701, SAOUHSC_00700
U331	1	688844	861	M4	0.994005994005994	SigA	1	caaatattacattctttttaaattgcaatccacatacctaattcattaacgttaaTGTGTTAAGATGATAAAAAatgagtaaggaaatgtgggtaagggga	UA75	UB1	UC1	688844	689317	689317	NA		SAOUHSC_00704
U332	1	689470	1007	M4	0.923076923076923	SigA	0.999000999000999	aacttataaaatgatgtaaatgttatgtcaaaatcaaccaATCCGTAATgtattttaaAATGTTAATATAGTTCTGAagaagtataaatgaggtgttgaaa	UA141	UB17	UC1	689470	689997	689997	ybaK		SAOUHSC_00705
U333	1	690218	101	M3	0.997002997002997	SigA	0.999000999000999	aatttgagtgtttgtgattgtttttggtaatttaTGATTGAAAAgtgaaagcgtaCTCATTATAATACAAAGTGAgatggggtgatgatgataattactga	UA142	UB42	UC1	690218	693975	693975	fruR, fruB, fruA, S273		SAOUHSC_00706, SAOUHSC_00707, SAOUHSC_00708, new_693888_694018_1
U334	1	694146	715	M4	0.98001998001998	SigA	1	aatgtatagacttttttaatattttgcaaaaagttATGCCAAacgaagcagaTATAGTAAAATATGAGTGTcttaaagtgaaaatttataaataaagaagg	UA3	UB1	UC1	694146	696933	696933	nagA, S274, S275, NA		SAOUHSC_00710, new_695377_695452_1, new_695454_695596_1, SAOUHSC_00711
U335	1	695454	616	M4	0.935064935064935	SigA	0.997002997002997	atgtatgcaatagatttaatctgtTAACATAAGcactttatatTATGATAAAATAGAAGCAAtaacatttttttctgggggtgtctaaatgggaaggcgat	UA3	UB1	UC1	695454	696933	696933	S275, NA		new_695454_695596_1, SAOUHSC_00711
U336	1	697120	1252	M3	0.924075924075924	SigA	0.948051948051948	ttaatgaataatttttattgaaagcgataattcgtatTAATTGAGTTtgttgaaaaattTAGGGTAATGTAAAGATATAaaagatacatagattggagaga	UA143	UB54	UC3	697120	699109	699109	NA, S276, csbB		SAOUHSC_00712, new_698008_698138_1, SAOUHSC_00713
U337	-1	701089	966	M3	0.545454545454545	SigA	1	ttaggtttaatttttggagtttttgcatatgctgcTAGTTTCTTTggagcctttgtTATGATAAATTATATCTTAGcagatatgatatttacgtatcctct	UA144	UB33	UC1	701089	699185	699185	saeR, saeS		SAOUHSC_00715, SAOUHSC_00714
U338	-1	701582	222	M3	0.928071928071928	SigA	0.932067932067932	tcaatggaaagcgtatgatttcacagcccccctagcTTGTAGAAATcatactttcctTTTTTCAATATATATACAACtattaaatcccataagattgcaga	UA145	UB55	UC1	701582	699185	699185	S277, saeQ, saeR, saeS		new_701384_701582_-1, SAOUHSC_00716, SAOUHSC_00715, SAOUHSC_00714
U339	-1	702210	220	M3	0.955044955044955	SigA	0.996003996003996	atattagttaagcgatatttaaacgaagttaagaattagtTAATGGCATAttatttgccttCATTTTAAACTTAACTTATCaaattgaagaaatgaggagt	UA145	UB55	UC1	702210	699185	699185	saeP, S278, S277, saeQ, saeR, saeS		SAOUHSC_00717, new_701584_701724_-1, new_701384_701582_-1, SAOUHSC_00716, SAOUHSC_00715, SAOUHSC_00714
U340	-1	703068	494	M3	0.909090909090909	SigA	1	aaggataacttattttactttttgcaagtcatatCTAATGAATAacaatatattaATTGATATAATAGTTGATTGaagtataacgaacaggagtccatcat	UA3	UB1	UC1	703068	702449	702449	NA		SAOUHSC_00718
U341	-1	704421	1249	M2	0.911088911088911	SigB	0.911088911088911	atggacaaagattttgtcattcatactcctttaatgTGGTTAAacaaagcagaaacgTGGAAATTAagtgatgaactcgaagttttagattatattcgtac	UA146	UB43	UC3	704421	703078	702449	queD, queE	NA	SAOUHSC_00720, SAOUHSC_00719	SAOUHSC_00718
U342	-1	705180	791	M3	0.867132867132867	SigA	0.997002997002997	ggatgtagctaaaactttaaaagcattgtcattatcctgACCTTGATTTtaactaatataTGGTATATTCTATTCATCGTacataaatgaatatcagaggt	UA3	UB1	UC1	705180	703078	702449	S279, queC, queD, queE	NA	new_704935_705180_-1, SAOUHSC_00721, SAOUHSC_00720, SAOUHSC_00719	SAOUHSC_00718
U343	1	709734	297	M3	0.998001998001998	SigA	0.999000999000999	aaataatatttggtacgtagctcatactcgagtCCGATGCAAAtaatttcctccTAATGTATAATGAAATAATActgtgttttatctgcgaaatgtatcat	UA1	UB1	UC1	709734	712080	712080	S282, ltaS		new_709734_710152_1, SAOUHSC_00728
U344	1	712311	609	M3	1	SigA	1	caacaatatattaaattatgacacttaacggtatCGATTTCTTTtgatttcaaaaAGGTGTATAATGTATAGAACtgatttaagtacgtagagatttcaac	UA3	UB1	UC1	712311	716024	716024	NA, recQ		SAOUHSC_00729, SAOUHSC_00730
U345	1	716203	914	M2	0.921078921078921	SigB	0.921078921078921	ttattaaaaaagttcaaggataaatcatttaaatttgaaaatTGTAATAaacgtggttaaataGGGAATACatacatataatctcggttttatgctatgag	UA147	UB1	UC1	716203	718744	718744	NA, opuBB		SAOUHSC_00731, SAOUHSC_00732
U346	1	718795	680	M3	0.482517482517482	SigA	0.587412587412587	ttaatcaaataacgaccaacgccacataagatgcgtaacacCaaattatatcttatgtggcGTTGTTATATTTAAATCTAtaattatgttcaatttaaaca	UA3	UB1	UC1	718795	718914	719577		hisC		SAOUHSC_00733
U347	1	718931	1098	M3	0.865134865134865	SigA	1	caatgtaagctattatgatgtgaaaatagtaGCATTGCATTttagaaacatagAGCGATATAATGAATATAAGttttttgaaatttcagttaattctaagg	UA7	UB5	UC5	718931	721277	721277	hisC, S283, NA, S284, S285		SAOUHSC_00733, new_720045_720394_1, SAOUHSC_00734, new_720938_721049_1, new_721149_721319_1
U348	1	719917	1332	M2	0.996003996003996	SigB	0.996003996003996	agtatttcttgccaagtcaaacgaatttTATATTtgtaaaaacaaagcGGGTAAATGaactttatgaagcacttttaaatgtagggtgtattacgcgacca	UA13	UB8	UC3	719917	719985	719985
U349	-1	722523	1451	M2	1	SigB	1	ttcatttattaccattttctctatttaaaaacatatttTTGGTATTaacaattaaaagtGGGTATATAtatttaatgaaccaatttttagaaagtaggcta	UA12	UB7	UC3	722523	721268	721268	NA, S287, S286		SAOUHSC_00736, new_721413_721560_-1, new_721239_721411_-1
U350	-1	724419	841	M3	0.977022977022977	SigA	0.979020979020979	aaaagaatattagtacacgaattaaacaacatttttatagaaacCTATTGCACTttaacgtcaatAAGTATATTTTTATATTATCtctaattaattgtgcg	UA3	UB1	UC1	724419	722747	722747	S288, NA		new_724254_724413_-1, SAOUHSC_00738
U351	-1	726018	742	M4	0.92007992007992	SigA	1	attatagtctttttatagtaaatttcaactatttATGCACAACatgttgtttTATGCTAATATAAATACGTtaattttatataaaagaggcgataaaattg	UA3	UB1	UC1	726018	724634	724634	S289, NA, queF		new_725849_726018_-1, SAOUHSC_00740, SAOUHSC_00739
U352	1	726073	427	M3	0.989010989010989	SigA	1	tttatattagcataaaacaacatgttgtgcataaaTAGTTGAAATttactataaaAAGACTATAATAGACTGTAGcgaacaaacgttctgtgtttatttgt	UA78	UB1	UC1	726073	730321	730321	S290, S291, S292, nrdI, nrdE, S293, nrdF		new_726071_726375_1, new_726377_726637_1, new_726639_726780_1, SAOUHSC_00741, SAOUHSC_00742, new_729248_729364_1, SAOUHSC_00743
U353	1	726377	944	M3	1	SigA	1	tggaacgttttacgaacattcgattagaaaatggCACTTTAAATcatagtgtgtcTTATGTATAATGAAACACATaatatagtgttggtgaaacgaaaaag	UA103	UB38	UC1	726377	730321	730321	S291, S292, nrdI, nrdE, S293, nrdF		new_726377_726637_1, new_726639_726780_1, SAOUHSC_00741, SAOUHSC_00742, new_729248_729364_1, SAOUHSC_00743
U354	1	726639	277	M3	0.818181818181818	SigA	0.868131868131868	atagtgatttttatacattcaacccatataagctactattttcTCAAATATAAatctatgcaatTGGTTTACATTTGAGAAAATaagtagcttcattatag	UA99	UB1	UC1	726639	730321	730321	S292, nrdI, nrdE, S293, nrdF		new_726639_726780_1, SAOUHSC_00741, SAOUHSC_00742, new_729248_729364_1, SAOUHSC_00743
U355	-1	726674	12	M1	0.912087912087912	NM	0.918081918081918	aattaaaaaatgctttaacaacatggttactatggttaTCTCAGCattgtattaACTATAatgaagctacttattttctcaaatgtaaaccaattgcatag	UA72	UB22	UC8	-1	-1	-1
U356	1	730985	201	M3	0.996003996003996	SigA	1	aaaattgacactaaattatttgaaaggCTATTGAAATtatggtcaaaaAACGCTACTATTAATGAGAAatattatcaatgataatgattatcattaattta	UA25	UB14	UC1	730985	734860	734860	sstA, sstB, NA, S294, NA		SAOUHSC_00746, SAOUHSC_00747, SAOUHSC_00748, new_733717_733834_1, SAOUHSC_00749
U357	-1	736484	642	M3	0.579420579420579	SigA	1	tttataattatactaattctaatactttcttttcaaTttTCGCAAAtgaattttaaaATTGGTATAATACTATATGatattaaagacatgagaaaggatgt	UA3	UB1	UC1	736484	734970	734970	murB, NA, S295		SAOUHSC_00752, SAOUHSC_00751, new_734943_735179_-1
U358	1	736525	730	M3	0.986013986013986	SigA	0.998001998001998	atatcatatagtattataccaattttaaaattcatttgcgaAAATTGAAAAgaaagtattagaATTAGTATAATTATAAAATAcggcattattgtcgttat	UA3	UB1	UC1	736525	740181	740181	S296, NA, S297, NA, S298, S299, NA, S300		new_736526_737170_1, SAOUHSC_00754, new_738079_738231_1, SAOUHSC_00755, new_738583_738717_1, new_738719_738976_1, SAOUHSC_00756, new_740102_740222_1
U359	-1	737137	629	M3	0.552447552447552	SigA	1	ttgcactccttaacagattcattatacaaaaacATGTTTATTAtgaaaatgaatTATGTTATAGTATTCCAGACtttatcgtgattaaattaattttcaat	UA3	UB1	UC1	737137	736500	734987	NA	murB, NA, S295	SAOUHSC_00753	SAOUHSC_00752, SAOUHSC_00751, new_734943_735179_-1
U360	1	737172	1131	M3	0.974025974025974	SigA	1	aatcacgataaagtctggaatactataacataatTCATTTTCATaataaacatgtTTTTGTATAATGAATCTGTTaaggagtgcaatcatgaaaaaaattg	UA58	UB9	UC4	737172	738719	740181	NA, S297, NA, S298	S299, NA, S300	SAOUHSC_00754, new_738079_738231_1, SAOUHSC_00755, new_738583_738717_1	new_738719_738976_1, SAOUHSC_00756, new_740102_740222_1
U361	1	737688	1339	M3	0.98001998001998	SigA	0.983016983016983	tttagattatacgaaacaatttgaaaaaaatagatacaAAGTTGAATCagaaattaaatTAGCTGATAATAAAAGTGAAgcaactaatcttacgacaaaat	UA148	UB8	UC3	737688	738702	740181	S297, NA, S298	S299, NA, S300	new_738079_738231_1, SAOUHSC_00755, new_738583_738717_1	new_738719_738976_1, SAOUHSC_00756, new_740102_740222_1
U362	1	738719	475	M3	1	SigA	1	ttattttatgtcacctttagaagcagttaAGTTAGTACTtttttacaaacATATGTATAATATATTCGAGtatttttattgaaaatattttggaaaacgac	UA3	UB1	UC1	738719	740181	740181	S299, NA, S300		new_738719_738976_1, SAOUHSC_00756, new_740102_740222_1
U363	-1	741583	1200	M4	0.982017982017982	SigA	0.999000999000999	ggtatattagtttctgaaattctatattacctatacACACGTATCaaacaactgTATGGTAAAATCAAAGGTAagacatataaaaaatcttacaacatgaa	UA46	UB6	UC4	741583	740274	740274	pepT		SAOUHSC_00757
U364	-1	744107	628	M3	0.999000999000999	SigA	1	aagtctatatcatacattaattttatatgtaaaCTAATGACAAattgtaagtttTCACTTACAATAGCTAGTGGtcaattaaaggagtcgattcagacatg	UA3	UB1	UC1	744107	743011	743011	NA		SAOUHSC_00760
U365	1	744189	728	M4	0.562437562437562	SigA	0.994005994005994	cattagtttacatataaaattaatgtatgatatagactttgaTGTTAAAatgttgccttaAATGATATGATGAAAAAATgaataataggcgatatataaga	UA3	UB1	UC1	744189	745502	745502	S301, llm		new_744189_744386_1, SAOUHSC_00762
U366	-1	746293	602	M3	0.999000999000999	SigA	0.999000999000999	cagttaaaaagaaaatggcaatcaaaCGATTTATAGtcatgtcattttCAGTGTATAATGAAGATTAAataatcttaagcttatgaattaaggagttatta	UA3	UB1	UC1	746293	745629	745629	NA		SAOUHSC_00763
U367	1	746360	832	M3	0.996003996003996	SigA	1	acactgaaaatgacatgactataaatcgtttgattgCCATTTTCTTtttaactgaaaTATTGTATCATTGCTATGAGtatattttaggaggacgactatga	UA3	UB1	UC1	746360	746760	746760	NA		SAOUHSC_00764
U368	1	748897	1461	M4	0.92007992007992	SigA	0.937062937062937	tgtaaattatatgctaaaaatatcagaaaattcaaagtgtttgcgtTTGCACGATagcgtaaaAATGTTAAAATATAATAAAgagttaccaataaagaggt	UA27	UB7	UC3	748897	752455	752455	NA, S302, S303, secA		SAOUHSC_00767, new_749556_749644_1, new_749646_749939_1, SAOUHSC_00769
U369	1	749646	920	M3	0.735264735264735	SigA	0.994005994005994	tatgactatttcatagttcgataatgtaatTTGTTGAATGaaacatagtgacTATGCTAATGTTAATGGATGtatatatttgaatgttaagttaataatag	UA123	UB1	UC1	749646	752625	752625	S303, secA, NA		new_749646_749939_1, SAOUHSC_00769, SAOUHSC_00770
U370	1	752727	733	M3	0.581418581418581	SigA	0.996003996003996	taattgtcagtgtgcttatatttcttaacaTTGTTATttaacaaaatTATGTTAAAATTTAGCATTAtaaaagatgcaaatcaatgacttgaattgaaata	UA3	UB1	UC1	752727	753883	753883	S304, prfB		new_752727_753020_1, SAOUHSC_00771
U371	-1	754741	506	M4	0.871128871128871	SigA	0.999000999000999	ttatgtgcaacaggtacagttggtactgatttTTGTACTTGagcaggtttgTATGCTACATTAACTGTCTtagttactgcttgcttaggtgcttgcttaac	UA3	UB1	UC1	754741	754673	754673
U372	1	755209	989	M4	0.753246753246753	SigA	0.99000999000999	tatatcaagacaagactatcctcttagcctgtttaagtaacaggttgagaggatttTTTGGTATCATTTAATCAGagttatataaagaagatatttaaatg	UA55	UB33	UC1	755209	755277	756263		NA, NA, S305		SAOUHSC_00774, SAOUHSC_00775, new_756202_756324_1
U373	1	755278	620	M3	0.999000999000999	SigA	0.999000999000999	aatcagagttatataaagaagatatttaaatgatattTAATTGATTGatatgtaaaaaGAAAGTATAATTTATGATTAattaatggaggaggtaattgaaa	UA3	UB1	UC1	755278	756297	756297	NA, NA, S305		SAOUHSC_00774, SAOUHSC_00775, new_756202_756324_1
U374	1	756388	1323	M4	0.821178821178821	SigA	0.953046953046953	ctatgtttgtttttctttgttcgacatttttacgaacaaacgtTTGCTTTTTgtgtgactacTTTGCTAAAATATGTAATGagaaagcaaagagttgagcg	UA149	UB8	UC3	756388	762485	762502	S306, uvrB, NA, S308, uvrB2, uvrA		new_756388_756469_1, SAOUHSC_00776, SAOUHSC_00778, new_758528_758666_1, SAOUHSC_00779, SAOUHSC_00780
U375	1	758668	1324	M1	0.99000999000999	NM	0.992007992007992	tcaaacatgaagaaatgaaatgactgagtcagccgagaagaattTCCCCGCttattcgcaCCTTCCttagtaatgattgatgaatcacatgtgacattacc	UA149	UB8	UC3	758668	762502	762502	uvrB2, uvrA		SAOUHSC_00779, SAOUHSC_00780
U376	-1	758676	1	M1	0.927072927072927	NM	0.962037962037962	gtctccgttatacatgcctcgaacttgcggtaatgtcacatgtgattcatcaatcattactaaggaaggtgcgaataagcggggaaattcttctcggctga	UA150	UB56	UC11	758676	757512	757512	NA, S307		SAOUHSC_A00747, new_757485_758564_-1
U377	1	763113	535	M4	0.667332667332667	SigA	0.997002997002997	aataacaataatgaacaattaatatttattttagcttttcaatgTAGATtggtgttatattTTTGATATGATAAGAAGAGatgtaagagtagggataaata	UA3	UB1	UC1	763113	767959	767976	hprK, lgt, NA, NA, trxB, S309		SAOUHSC_00781, SAOUHSC_00782, SAOUHSC_00783, SAOUHSC_00784, SAOUHSC_00785, new_767890_768017_1
U378	1	766911	164	M3	0.967032967032967	SigA	1	actgaacaaaatgattgaatttctcttgagcatatAGATTTATGAaaagttagattTATTATATAATGCGCATAATgattaataatgaggaggcgttaata	UA97	UB26	UC1	766911	767976	767976	trxB, S309		SAOUHSC_00785, new_767890_768017_1
U379	1	768044	516	M4	0.510489510489511	SigA	0.96003996003996	taaagcaaattatatagaaaactagaacttagtacgtatcatttgtgcgtttcaatgagttctagtttttttaTATGTTATATTAAACTTATaactttatg	UA3	UB1	UC1	-1	-1	-1
U380	1	769624	1418	M2	1	SigB	1	aaagagacggagattttctttgaaaaattaactgatTTGTTAGAttttatgatacccGGGTATAAAaaagaagggaaatctcaattagtaattgccatcgg	UA12	UB7	UC3	769624	772974	772991	NA, S311, whiA, S312, S313, clpP		SAOUHSC_00788, new_770787_770895_1, SAOUHSC_00789, new_771863_772275_1, new_772277_772377_1, SAOUHSC_00790
U381	1	772277	138	M3	0.996003996003996	SigA	0.999000999000999	ccacaaggagcaaatatgtaatcatatCTCTGTACTAtgagaagtaaaATAAGTACAATCTAAAATAGatattatcagtttacaaaggaaagagaaaagcg	UA68	UB26	UC1	772277	772974	772991	S313, clpP		new_772277_772377_1, SAOUHSC_00790
U382	1	772379	121	M3	1	SigA	1	caaacaatgtaactatttaaagtcaaagTGTTTGACCAaatttgacttaATATGTAAAATAATGAGTAAcagttattacaaggaggaaatatagatgaatt	UA151	UB57	UC1	772379	773093	773093	clpP		SAOUHSC_00790
U383	1	774279	66	M3	0.841158841158841	SigA	0.999000999000999	tatttagacaataatatgtcaataactttttttgaattGTATTTTAAtaaaaatgataTAAGTTATAATAAAGGTGTAccttcgataacgaataaacatct	UA35	UB19	UC7	774279	774368	774368	S317		new_774283_774396_1
U384	-1	774310	1101	M3	0.436563436563437	NM	0.547452547452547	caaatttttaccttcgtttgtatcatgcagcgttttaCACatacttttaagagaTGTTTAttcgttatcgaaggtacacctttattataacttatatcatt	UA152	UB34	UC5	774310	772863	772863	S316, NA, S315, S314		new_774146_774310_-1, SAOUHSC_00792, new_773143_773242_-1, new_772830_773141_-1
U385	-1	774434	1317	M2	0.998001998001998	SigB	0.998001998001998	tatattactatgtattcttaaatttgtttaaaaaattaaTGCTTTAaattgatgtataatGGGAATAAGaaataaataaaaacgacccgcacgattaacgt	UA153	UB13	UC3	774434	772982	772982	S318, S316, NA, S315, S314		new_774312_774434_-1, new_774146_774310_-1, SAOUHSC_00792, new_773143_773242_-1, new_772830_773141_-1
U386	1	774487	917	M3	0.618381618381618	SigA	0.985014985014985	ttattcccattatacatcaatttaaagcattaattttttaaacAAatttaagaataCATAGTAATATAACAATCTAaacataaaaacttttaacacaacac	UA123	UB1	UC1	-1	-1	-1
U387	1	774645	1044	M4	0.671328671328671	SigA	0.673326673326673	gttaaaatgttaattttcaaaaaaaggctcaaaatatgttTGAtttagttattaAATGTTAAGATATATAAGActactatttctttgtaaaaatgaatccg	UA137	UB10	UC5	774645	775864	783446	S319, NA, S320	S321, S322, gapR, gapA, S323, pgk, S324, tpiA, pgm, S325, eno, S326	new_774645_774847_1, SAOUHSC_00793, new_775515_775877_1	new_775879_776010_1, new_776012_776118_1, SAOUHSC_00794, SAOUHSC_00795, new_778196_778333_1, SAOUHSC_00796, new_779525_779645_1, SAOUHSC_00797, SAOUHSC_00798, new_781928_782008_1, SAOUHSC_00799, new_783362_783489_1
U388	1	775879	1033	M2	1	SigB	1	cattgatttatgtcctagtctcaaataataagcaaATGATTATcgagtcagtataaGGGTATACAtttgactacagcgaataaaataaaacgttttgttga	UA154	UB10	UC5	775879	782001	788614	S321, S322, gapR, gapA, S323, pgk, S324, tpiA, pgm, S325	eno, S326, S327, NA, secG, S328, est, rnr, smpB, S329	new_775879_776010_1, new_776012_776118_1, SAOUHSC_00794, SAOUHSC_00795, new_778196_778333_1, SAOUHSC_00796, new_779525_779645_1, SAOUHSC_00797, SAOUHSC_00798, new_781928_782008_1	SAOUHSC_00799, new_783362_783489_1, new_783585_783700_1, SAOUHSC_00800, SAOUHSC_00801, new_784460_784574_1, SAOUHSC_00802, SAOUHSC_00803, SAOUHSC_00804, new_788284_788675_1
U389	1	776012	59	M3	0.994005994005994	SigA	1	atcaaattatttagaaaatttaagttttaTGCTTGCAATttttgaaatagAATAGTACTATTGCAAGTGTaaagaggttaatttttgtcccacgcgggact	UA63	UB25	UC7	776012	783548	788614	S322, gapR, gapA, S323, pgk, S324, tpiA, pgm, S325, eno, S326	S327, NA, secG, S328, est, rnr, smpB, S329	new_776012_776118_1, SAOUHSC_00794, SAOUHSC_00795, new_778196_778333_1, SAOUHSC_00796, new_779525_779645_1, SAOUHSC_00797, SAOUHSC_00798, new_781928_782008_1, SAOUHSC_00799, new_783362_783489_1	new_783585_783700_1, SAOUHSC_00800, SAOUHSC_00801, new_784460_784574_1, SAOUHSC_00802, SAOUHSC_00803, SAOUHSC_00804, new_788284_788675_1
U390	1	782010	243	M3	0.616383616383616	SigA	0.999000999000999	acgcttaatgacacttattttttgaaaataatagtaatatcATTTTGTTaaatgaaagaatAAAGCTATAATAATTATAGAataactatttaaaggagatt	UA155	UB1	UC1	782010	783582	788614	eno, S326	S327, NA, secG, S328, est, rnr, smpB, S329	SAOUHSC_00799, new_783362_783489_1	new_783585_783700_1, SAOUHSC_00800, SAOUHSC_00801, new_784460_784574_1, SAOUHSC_00802, SAOUHSC_00803, SAOUHSC_00804, new_788284_788675_1
U391	1	783585	523	M3	0.973026973026973	SigA	1	ataacagactaataatcatgaggtaactaataacacATATTTAACTtgtattcttaaACTGGTATAATAAATTTATGttgaaatgaatattgtatgacagg	UA3	UB1	UC1	783585	787917	788631	S327, NA, secG, S328, est, rnr, smpB	S329	new_783585_783700_1, SAOUHSC_00800, SAOUHSC_00801, new_784460_784574_1, SAOUHSC_00802, SAOUHSC_00803, SAOUHSC_00804	new_788284_788675_1
U392	1	784186	895	M4	0.675324675324675	SigA	1	ttctatcaaacgtaaaagtacatttaatcgctagaaaattgattttaacaataaaaaTATGATATACTACTTGTCGtatataaggaacggaggacaattta	UA75	UB1	UC1	784186	788631	788631	secG, S328, est, rnr, smpB, S329		SAOUHSC_00801, new_784460_784574_1, SAOUHSC_00802, SAOUHSC_00803, SAOUHSC_00804, new_788284_788675_1
U393	1	788240	388	M3	0.959040959040959	SigA	1	tgcgcgcgatatgaaagcccgttattaagcgattTAGTTGCTTAatcgggctataTTTGATATAGTTATATGTGCttttgtaaattacaaaagtatgattt	UA20	UB1	UC1	788240	788631	788631	S329		new_788284_788675_1
U394	1	788284	1237	M4	0.436563436563437	SigA	0.521478521478521	atcgggctatatttgatatagttatatgtgcttttgtaaattacaaaagtatgatttgTTTGATTTATtatttcggggacgttcatggattcgacaggggt	UA156	UB52	UC2	788284	788648	788648	S329		new_788284_788675_1
U395	-1	791115	1138	M3	0.725274725274725	SigA	1	atctttcgatatattacaagtttttttaaaaaagTAATATATTTctatcaataaaAGTAATATAATATTAGTAATtatagtttcattaatttattgcaaca	UA157	UB9	UC4	791115	789540	789540	S331, NA, S330, NA, NA		new_790935_791115_-1, SAOUHSC_00808, new_790015_790192_-1, SAOUHSC_00807, SAOUHSC_00806
U396	1	791458	1385	M2	1	SigB	1	taaagcaaaactttttatatgagcagtcgaatataACGTTTAAaatgattgtttttGGATATAAAcgattaagtaaaatgctttttcagtttgaaattaat	UA12	UB7	UC3	791458	792932	795788	NA, S332, NA, S333	clfA	SAOUHSC_00810, new_792055_792192_1, SAOUHSC_00811, new_792724_792926_1	SAOUHSC_00812
U397	1	792928	1404	M2	0.997002997002997	SigB	0.997002997002997	cgatacaaattaattgctataatgcaattttagtgtataattccattgacaGAGATTAAatatatctttaaaGGGTATATAgttaatataaaatgactttt	UA12	UB7	UC3	792928	795788	795788	clfA		SAOUHSC_00812
U398	1	794683	1390	M1	0.758241758241758	NM	0.776223776223776	acaacctgatgagcctggtgaaattgaaccaattccagaggattcagattctgacccaggttcagattctggcagcgattctaattcagatagcggttcag	UA12	UB7	UC3	794683	795771	795771
U399	-1	795830	1406	M1	0.501498501498502	NM	0.56043956043956	actgttgatgaattaattattaattatattcaaacaatatatttggaaaatccaagtaaaaaagccaccttttaaggtggcttcttcatgaatcatatgat	UA12	UB7	UC3	795830	795575	795575
U400	1	795907	36	M3	0.507492507492508	SigA	0.673326673326673	aaatatattgtttgaatataattaataattaattcatcaacagtTAATTATtttaaaaaggtagaTGTTATATAATTTGGCTTGGcgaaaaaatagggtgt	UA158	UB58	UC12	795907	797165	797165	NA, vwb		SAOUHSC_00813, SAOUHSC_00814
U401	1	795941	232	M3	0.891108891108891	SigA	0.9000999000999	catcaacagttaattattttaaaaaggtagatgttatataatttgGCTTGgcgaaaaaatagggtgTAAGGTAGGTTGTTAattagggaaaattaaggaga	UA159	UB55	UC1	795941	797590	797590	NA, vwb, S334		SAOUHSC_00813, SAOUHSC_00814, new_797516_797637_1
U402	1	797792	217	M3	0.95004995004995	SigA	0.984015984015984	ataaaaatgttaagacaacgtttacttcaagtTAATTATTATactgaaaattcTGGTATATAATGCTGTTAGTgaatataacagggaaattatattggtta	UA160	UB15	UC1	797792	798440	798440	emp		SAOUHSC_00816
U403	1	799997	221	M3	0.957042957042957	SigA	0.996003996003996	taattattaaatttttattaattaattgtaaaaatgtaTAATTataattaattaacgtttAATATTAAAATTAActaaaaagaaagaggtgttagttatga	UA145	UB55	UC1	799997	800718	800718	nuc		SAOUHSC_00818
U404	1	800944	900	M3	0.996003996003996	SigA	0.998001998001998	tactatatagttcaatgtgtattatcacagaaaataaaataaTGCTTTACTTctatatttaaAAGTGTATAATGAAAGTTAAgtaataaagagcgtgaaga	UA75	UB1	UC1	800944	801296	801296	S337, cspC		new_800944_801076_1, SAOUHSC_00819
U405	-1	802377	1435	M2	1	SigB	1	taaagcttattaacacagtttcatcaaatagttaaattAGTTTTTgttttgcaataaattGGGTATAGAttacaaatgatatttcaggaggcccaatattt	UA12	UB7	UC3	802377	801508	801508	NA, NA, S339		SAOUHSC_00821, SAOUHSC_00820, new_801557_801772_-1
U406	-1	803088	621	M3	0.973026973026973	SigA	0.994005994005994	tcaatgatgtttcagactgttttttattctTAATAGACATttcacactctcaTACTTTAATATTTAAGATATgttttagtcttacaagcttattaaagatt	UA3	UB1	UC1	803088	801593	801542	S340, NA, NA, NA, S339		new_802995_803088_-1, SAOUHSC_00822, SAOUHSC_00821, SAOUHSC_00820, new_801557_801772_-1
U407	-1	803703	1158	M4	0.542457542457542	SigA	0.995004995004995	ctgcaaataatattttaaaaataactatactttttATTTACCTattgaaaaatAGTGTTATCATATTTATTAAgaagctatttttatactagtaggtgtca	UA161	UB21	UC4	803703	803191	803191	NA, NA		SAOUHSC_00824, SAOUHSC_00823
U408	1	803940	414	M3	0.736263736263736	SigA	0.996003996003996	tagaatcagatatcaaaaaaatgtgcaaaatcacttttgcACATTTACAAatactagtttTCTGATAAGATTAATAATAAcactttaaatagcgcttaata	UA8	UB1	UC1	803940	804781	804781	NA, S343, S344, NA		SAOUHSC_00825, new_804204_804450_1, new_804456_804681_1, SAOUHSC_00827
U409	1	804456	904	M1	0.874125874125874	NM	0.895104895104895	ttttgtggattcacataattacattgattatgattatccataaacaCTCACTCctttaaaatTCTGTActcttcattgcgttttaccccgtcacattatct	UA133	UB1	UC1	804456	805189	805189	S344, NA		new_804456_804681_1, SAOUHSC_00827
U410	-1	804478	1415	M2	1	SigB	1	gatgtacatttttttcataagtaatgatgatttTAGTTTAAaagataatgtgacgGGGTAAAACgcaatgaagagtacagaattttaaaggagtgagtgtt	UA12	UB7	UC3	804478	803191	803191	NA, S342, S341, NA, NA		SAOUHSC_00826, new_803915_804199_-1, new_803705_803913_-1, SAOUHSC_00824, SAOUHSC_00823
U411	-1	805983	1092	M3	0.721278721278721	SigA	1	taggttctatttttcatacaactactctaCTATTGAGTAgttgttttttaTTTGATATGATAACAATAAGttttttcagaatattctatgttttaggggtg	UA6	UB5	UC5	805983	805316	805316	NA		SAOUHSC_00828
U412	1	806379	32	M1	0.97002997002997	NM	0.974025974025974	acaaagttgtatttaattaatgatttatgttcttttccaacgtatcgaatttgttctaaggcaGCtgttgcgataagtgtttcgttttcataacagccaaa	UA162	UB59	UC13	-1	-1	-1
U413	-1	806646	1069	M3	0.944055944055944	SigA	0.999000999000999	ataatccatttacaagaatgtgcatataaatcagTGATTGCAAAattttaataaaCATTTTAATATGTAATTAAGaaatttttttagtacaaaatctttct	UA163	UB5	UC5	806646	806064	806064	NA		SAOUHSC_00830
U414	-1	807174	35	M1	0.938061938061938	NM	0.972027972027972	ggtgctttcgacctaattttaaagcaaaacaaagtgcgtgatGCTCATCCagaagtaacACTAACagtgagactagaagatgattcagactcagaaagtcc	UA164	UB60	UC12	807174	806948	806948
U415	-1	807442	1365	M2	1	SigB	1	actttttatccttcaatcaaacaatgctataaatgaaaATGATTAAggtattttcgaatGGGTAAAGCataaatgtattttaaattaggaggttataagta	UA76	UB7	UC3	807442	806659	806098	ohrA, S345	NA	SAOUHSC_00831, new_806648_806903_-1	SAOUHSC_00830
U416	1	807506	272	M3	0.999000999000999	SigA	1	tcgaaaataccttaatcattttcatttatagcattgttTGATTGAAGGataaaaagttgTTGTTTACAATAAAAATAATgagtatctgaaatgagggattc	UA10	UB1	UC1	807506	808878	808878	aroD, NA		SAOUHSC_00832, SAOUHSC_00833
U417	1	808307	185	M3	0.999000999000999	SigA	1	cacaagtgactttatactaataaaatgaattAGGTTGCTTTtgtgtaagtgcTGTCTTATAATTGAGAAGTAttatcattgttcgtggaggagcgatttta	UA25	UB14	UC1	808307	808878	808878	NA		SAOUHSC_00833
U418	-1	809407	831	M3	0.964035964035964	SigA	0.999000999000999	tatatcattttccaaagcaaaaggctttcattttgaagctaaaATTTTTTATTatgatataaatTTAGCTATAATAAAAATTATtaaactatctagaggag	UA3	UB1	UC1	809407	809022	809022	NA		SAOUHSC_00834
U419	1	809457	304	M4	0.544455544455544	SigA	0.989010989010989	tagctaaatttatatcataataaaaaattttagcttcaaaatgaAAGCCTTttgctttggaaAATGATATATTTATTTTAAAtacataaaggaggttgcag	UA1	UB1	UC1	809457	812890	815661	NA, S346, gcvH, NA, truncated-SA, S347, S348, NA, NA	S349, NA, NA, NA	SAOUHSC_00835, new_809859_810015_1, SAOUHSC_00836, SAOUHSC_00837, SAOUHSC_00838, new_811454_811871_1, new_811986_812153_1, SAOUHSC_00840, SAOUHSC_00841	new_812901_813069_1, SAOUHSC_00842, SAOUHSC_00843, SAOUHSC_00844
U420	1	812155	1412	M2	0.848151848151848	SigB	0.848151848151848	attaagctagtttaaattttttgtgatttaTGTTTTAttcataccaattttGTGAAATGAtacagtgacagatgtttattgattttaaagggtgatgatga	UA12	UB7	UC3	812155	815950	823209	NA, NA, S349, NA, NA, NA, S350	NA, S351, S353, sufC, S354, sufD, S355, sufS, sufU, S356, sufB, S357	SAOUHSC_00840, SAOUHSC_00841, new_812901_813069_1, SAOUHSC_00842, SAOUHSC_00843, SAOUHSC_00844, new_815706_815973_1	SAOUHSC_00845, new_816270_817529_1, new_817531_817631_1, SAOUHSC_00847, new_818394_818490_1, SAOUHSC_00848, new_819799_819903_1, SAOUHSC_00849, SAOUHSC_00850, new_821609_821758_1, SAOUHSC_00851, new_823157_823252_1
U421	1	812901	1059	M3	0.986013986013986	SigA	0.998001998001998	gtgactgatttgttagaaaatttaaaatagTTATTGACGAaattttactaaGGTGTTAGGATTAATACAAAttaaatgatgcgtaaactcttatcgagagt	UA69	UB5	UC5	812901	815967	823209	S349, NA, NA, NA, S350	NA, S351, S353, sufC, S354, sufD, S355, sufS, sufU, S356, sufB, S357	new_812901_813069_1, SAOUHSC_00842, SAOUHSC_00843, SAOUHSC_00844, new_815706_815973_1	SAOUHSC_00845, new_816270_817529_1, new_817531_817631_1, SAOUHSC_00847, new_818394_818490_1, SAOUHSC_00848, new_819799_819903_1, SAOUHSC_00849, SAOUHSC_00850, new_821609_821758_1, SAOUHSC_00851, new_823157_823252_1
U422	-1	813057	1511	M1	0.876123876123876	NM	0.901098901098901	tgattcctccctgtgttgcttaataaaataaaaaatgctttCTCAATatcgatagaaaaATTGagaaagcaatagtagtattgtttctctcatcttcaaaa	UA101	UB41	UC9	813057	812966	812966
U423	1	815975	1455	M2	1	SigB	1	ataaaatgacgtcaaatcaatatcaaaaattatttaagtaaaATGTTTAGataatttttcagtGGGTAAGTAttatatataacatttaattattccgagga	UA12	UB7	UC3	815975	823209	823209	NA, S351, S353, sufC, S354, sufD, S355, sufS, sufU, S356, sufB, S357		SAOUHSC_00845, new_816270_817529_1, new_817531_817631_1, SAOUHSC_00847, new_818394_818490_1, SAOUHSC_00848, new_819799_819903_1, SAOUHSC_00849, SAOUHSC_00850, new_821609_821758_1, SAOUHSC_00851, new_823157_823252_1
U424	-1	816247	1483	M1	0.995004995004995	NM	0.996003996003996	tatccacttttttaatacaaaaaccaCCTAGCCgatggttataCCGACtaagtggcatgtgcagtgtattaggaataaaaagtaaaattactcgcctttgt	UA165	UB61	UC14	816247	816043	816043
U425	-1	817386	432	M4	0.861138861138861	SigA	1	taaaaatataaatgataataagtgcacataatttctcaatggattttatgaatttaaaaTATGTTATCATTTCACTAGgacatttgtaatatggtatgatg	UA14	UB1	UC1	817386	816519	816519	S352, NA		new_817305_817386_-1, SAOUHSC_00846
U426	1	817531	1041	M2	0.598401598401598	SigB	0.598401598401598	ttagagttattaaaaataataaaaagGGTTTAagttgtttatattaAGGTATAagtaagttataattaactgaacgcattattacaaagtctttttgacta	UA137	UB10	UC5	817531	823209	823209	S353, sufC, S354, sufD, S355, sufS, sufU, S356, sufB, S357		new_817531_817631_1, SAOUHSC_00847, new_818394_818490_1, SAOUHSC_00848, new_819799_819903_1, SAOUHSC_00849, SAOUHSC_00850, new_821609_821758_1, SAOUHSC_00851, new_823157_823252_1
U427	-1	823897	274	M3	0.99000999000999	SigA	0.993006993006993	atgaaaaatttcaacaaattcagtttatgACATAGTTATaatcatttgaaACCATTATAATGATAACAACcagtttctcataaatttattctaattatctt	UA99	UB1	UC1	823897	823795	823795
U428	1	824098	1380	M2	0.997002997002997	SigB	0.997002997002997	aatgcatattaattatcattattaagactattatatataatgaattttaacTGGTTTATtaaacgagaacgtcGGGAATTAAgtaactacaataaaaataa	UA12	UB7	UC3	824098	826303	826303	NA, NA		SAOUHSC_00854, SAOUHSC_00855
U429	1	826371	921	M3	0.653346653346653	SigA	0.697302697302697	agcacccccaaacattattttagTGCTTGCCATttttgtggattGCGTTTCTATTTTACCAATTtaatcaaacgaaaacatcaagctgaagatcgccgaaa	UA166	UB1	UC1	826371	826575	831029	NA, NA	NA, NA, lipA, S358, NA	SAOUHSC_00857, SAOUHSC_00858	SAOUHSC_00859, SAOUHSC_00860, SAOUHSC_00861, new_830535_830663_1, SAOUHSC_00862
U430	1	826480	441	M4	0.978021978021978	SigA	0.996003996003996	tcaagcaaaaacatcaaactaaagttcgctgaaatgattatgataaaagttaTATGGTATGATGACATTGGtgatatatatgataaacatcggattaacag	UA93	UB1	UC1	826480	831029	831029	NA, NA, NA, lipA, S358, NA		SAOUHSC_00858, SAOUHSC_00859, SAOUHSC_00860, SAOUHSC_00861, new_830535_830663_1, SAOUHSC_00862
U431	1	829581	448	M4	0.671328671328671	SigA	1	attggaatattaaaaagtaagattattggaTTTTCATTtgtcatgaatTTCGATATAATGTTTAAAGatacacttaacaggagggtatgtgttgttatggc	UA93	UB1	UC1	829581	831029	831029	lipA, S358, NA		SAOUHSC_00861, new_830535_830663_1, SAOUHSC_00862
U432	-1	831434	596	M3	0.962037962037962	SigA	0.998001998001998	tacattccttgtcacctctcacttatatattatcataATTTTGCAGTatacttcatttGTCGTTATACTAACTTTACTacttttaaaaggagtcgctacaa	UA3	UB1	UC1	831434	831139	831139	NA		SAOUHSC_00863
U433	1	831454	565	M4	0.909090909090909	SigA	1	ttgtagcgactccttttaaaagtagtaaagttagtataacgacaaatgaagtatactgcaaaatTATGATAATATATAAGTGAgaggtgacaaggaatgta	UA3	UB1	UC1	831454	838356	838356	NA, NA, S359, NA, S360, NA, dltX, dltA, dltB, dltC, dltD		SAOUHSC_00864, SAOUHSC_00865, new_832704_832810_1, SAOUHSC_00866, new_833696_833948_1, SAOUHSC_00867, SAOUHSC_00868, SAOUHSC_00869, SAOUHSC_00870, SAOUHSC_00871, SAOUHSC_00872
U434	1	838923	1207	M3	0.94005994005994	SigA	0.999000999000999	ttcagtaggcatcaggcaagtctcctttcgaGAGATGAATTtgataatctttATTAGTATATTATAATAGATagtgtaataaaaatctatcaaaccaatgg	UA167	UB6	UC4	838923	839291	839291	NA		SAOUHSC_00874
U435	-1	838929	935	M3	0.983016983016983	SigA	1	actcacgtgctccatatatttatcccccattggttTGATAGATTTttattacactaTCTATTATAATATACTAATAaagattatcaaattcatctctcgaa	UA168	UB29	UC1	838929	838602	838602	nifU		SAOUHSC_00873
U436	-1	840575	1209	M3	0.999000999000999	SigA	0.999000999000999	ttatgtaatagtgccttagttagtacaaatattTATTTGTAGTcattttcaaaaAAATATATAATAAGCATATAaatacatatttacttttttaggggtta	UA167	UB6	UC4	840575	839367	839367	S361, NA		new_840422_840574_-1, SAOUHSC_00875
U437	1	840699	892	M4	0.892107892107892	SigA	0.997002997002997	ggataagaaacatcagttgttgctaattgagcacatcatgTTAAAATACcagttttaaAATGCTATAATATTGTAACaaatgaaataagaaggtgaagtat	UA75	UB1	UC1	840699	841382	841382	NA, NA		SAOUHSC_00876, SAOUHSC_00877
U438	1	841613	797	M3	1	SigA	1	aaaattaattaattttttcacaatctgactgaatctTGCTTGAAAAtataacataaaAGCTATAGAATTAGTATTGGattaaaaatgtcttttttgtgaac	UA3	UB1	UC1	841613	843031	843031	S363, ndh2		new_841613_841799_1, SAOUHSC_00878
U439	1	843097	548	M3	0.965034965034965	SigA	0.995004995004995	taaaattaaattattcatttataaagtccttCAGTGTCACTgaagggctttatTGTTGTACAATTTGAAGTGAgtaacatatcaaatctaaggaggtacat	UA3	UB1	UC1	843097	844595	844595	ampA		SAOUHSC_00879
U440	1	844969	513	M3	0.999000999000999	SigA	1	ttaactaaaaaataaagattattggtatagtttgCTATTGACAGgtgttaaagctACTGATACTATGTAGTCTATaaacgctttagttcgatagagtgata	UA3	UB1	UC1	844969	846720	846720	NA, NA		SAOUHSC_00880, SAOUHSC_00881
U441	-1	848005	178	M3	0.974025974025974	SigA	1	tacagattcgccctatctacatatatctctttaattTAATTGCCTTtcatgtcgttaTGTATTATGATAATAATAATtataaatcgtaactattacgtttt	UA89	UB14	UC1	848005	846813	846813	NA		SAOUHSC_00882
U442	-1	853990	827	M3	0.997002997002997	SigA	0.997002997002997	aataaagcacaacaaggagtgtgtaCGTTTTTCAGaactatatcatTCATGTATAATGAATAACATaaatattttttaaaggaggacaacatagtgagttt	UA3	UB1	UC1	853990	848173	848173	mnhA, mnhB, mnhC, mnhD, mnhE, mnhF, mnhG		SAOUHSC_00889, SAOUHSC_00888, SAOUHSC_00887, SAOUHSC_00886, SAOUHSC_00885, SAOUHSC_00884, SAOUHSC_00883
U443	1	854491	543	M4	0.743256743256743	SigA	0.998001998001998	ccatagctacctgttttgtgtgaaaatcgatatagcttcatgctaTTTTCCTcccttaaaagTATGTTAATATATATGTATcataacatgaatggagaata	UA3	UB1	UC1	854491	855203	855203	NA, S365		SAOUHSC_00891, new_855129_855246_1
U444	-1	854514	559	M4	0.983016983016983	SigA	1	cttgttgtacttctttgtttaactgtggatagttagccatttatattctccattCATGTTATGATACATATATattaacatacttttaagggaggaaaata	UA3	UB1	UC1	854514	854004	848173	kapB, S364	mnhA, mnhB, mnhC, mnhD, mnhE, mnhF, mnhG	SAOUHSC_00890, new_853992_854087_-1	SAOUHSC_00889, SAOUHSC_00888, SAOUHSC_00887, SAOUHSC_00886, SAOUHSC_00885, SAOUHSC_00884, SAOUHSC_00883
U445	1	855507	376	M4	0.937062937062937	SigA	1	aaaataatattcgtatgatttgattttttaatTAGTCCACcatttcgattTGTGCTATGATAATAGTGTtaagtaaacgaaataaggggttattaagttga	UA57	UB1	UC1	855507	855968	855968	S366, NA		new_855509_855576_1, SAOUHSC_00892
U446	-1	856180	75	M5	0.918081918081918	NM	0.946053946053946	taattttttcattctccaattatctgtttatatagttgcaattcgtttaatactttaagttgtagttctcatttctaaaataaataaaaaaaacaaatcca	UA169	UB32	UC1	856180	856146	856146
U447	1	856253	883	M3	0.55044955044955	SigA	0.993006993006993	aaacgaattgcaactatataaacagatAATTGGAGAAtgaaaaaattaCATGTTATAGTCAACTCAATaattttaaggaggaattaagtaatgaaaagtaa	UA75	UB1	UC1	856253	856376	856376	NA		SAOUHSC_00893
U448	1	857551	1295	M3	0.953046953046953	SigA	0.999000999000999	gtaaaatatacttttgattaagtgtaaaattatcaattctttTGCTTGTAATcatttaagtaatTATGTCATTATAAATGTAAGggttttcaaaatagaca	UA36	UB3	UC3	857551	860269	860269	S368, rocD, S369, gudB		new_857549_857682_1, SAOUHSC_00894, new_858909_859016_1, SAOUHSC_00895
U449	1	857684	1067	M3	0.992007992007992	SigA	0.999000999000999	ttttggtggaaaagtatctgctttgaaaactaatGTAATTATTtggataatgttTCATGTATAATAGTTATAAAtgatgaaaaggggagatatgatgacta	UA170	UB5	UC5	857684	860252	860252	rocD, S369, gudB		SAOUHSC_00894, new_858909_859016_1, SAOUHSC_00895
U450	-1	861743	1066	M3	0.894105894105894	SigA	0.997002997002997	caaaaatgttataaattgtaaaagaaatgtgtaaaGCGTTTTCACaagcaggttttTGTAGTATTTTAAAATTGTTagactacaaataaagagatgaaagg	UA83	UB5	UC5	861743	860736	860736	glpQ		SAOUHSC_00897
U451	-1	864554	239	M3	0.851148851148851	SigA	1	cgcattttatgaataaatatgtaaaataaTGGTTTTATTttcattaaaagTTTGCTATCATGTGTTCATAcgaaatattcagataactacaatgaggtgaa	UA171	UB1	UC1	864554	861943	861943	argG, argH		SAOUHSC_00899, SAOUHSC_00898
U452	1	864814	825	M3	0.997002997002997	SigA	1	gtcacataaatatcaattttattgattaagtacaaacttgtGAATTGAATCgcaaacgtaaaCTTAGTAAAATTAAGATATTaaatgaaacaggaggcttt	UA3	UB1	UC1	864814	866253	866253	pgi, S370		SAOUHSC_00900, new_866192_866286_1
U453	1	866404	823	M4	0.816183816183816	SigA	0.998001998001998	gacaagatgttaagagaaaattaaagataaaataatATCTGCcttacaataatATTGTTATACTACTAGAGActgatttattagcatgattacatgttaat	UA3	UB1	UC1	866404	868208	868208	S371, NA, spsA, S372, spsB		new_866406_866515_1, SAOUHSC_00901, SAOUHSC_00902, new_867621_867743_1, SAOUHSC_00903
U454	1	868344	267	M4	0.938061938061938	SigA	0.997002997002997	taaaagctaagttcgaaatgaacttataataaatcaatcacaatcacttTGTGTTAAAATATGTGTCAaaggaagtgagggtttgtcatgacattacatgc	UA10	UB1	UC1	868344	875620	876555	addB, addA, S373	NA	SAOUHSC_00904, SAOUHSC_00905, new_875502_875622_1	SAOUHSC_00906
U455	1	875624	326	M3	0.965034965034965	SigA	1	tgaacacaactcattttcaaaattgtcttacttattTATTTGTTATttgataacgaaaAAAGTTATAATGTGAATTAAgataaagatgaggagttgagaat	UA1	UB1	UC1	875624	876555	876555	NA		SAOUHSC_00906
U456	1	879207	1303	M3	0.862137862137862	SigA	0.869130869130869	atgagtaagcatatttttgatttcagGTATTTTACtttcttcggctTCAATTAAAATTGAGGTAGGggattctttcaagtggacaagtaaattaccagttt	UA92	UB3	UC3	-1	-1	-1
U457	-1	879699	553	M4	0.881118881118881	SigA	1	atcacctctttaatgtcatattattcataatatatcaaatatcCGACAAAAcgccaataaAATGCTATGATGTATCTATatgaactaagcaacttatgagg	UA3	UB1	UC1	879699	877396	877396	NA, cdr		SAOUHSC_00909, SAOUHSC_00908
U458	1	879721	877	M3	0.593406593406593	SigA	0.995004995004995	tcataagttgcttagttcatatagatacatcatagcattTTATTGGCGTtttgtcggataTTTGATATATTATGAATAATatgacattaaagaggtgatat	UA75	UB1	UC1	879721	880142	880142	S376, NA, S377		new_879721_879805_1, SAOUHSC_00910, new_880073_880178_1
U459	1	882470	1444	M2	0.99000999000999	SigB	0.99000999000999	ttaaaagcacttaaaaagaaataacatATGTTTAAtaagtctagttaatGTGTAACGTaacattagctagatttttttattcaaaaaaatatttacaaata	UA12	UB7	UC3	882470	882522	885463	S378	S379, clpB, S380	new_882471_882539_1	new_882541_882635_1, SAOUHSC_00912, new_885279_885510_1
U460	1	882541	1246	M3	0.998001998001998	SigA	0.999000999000999	tttttttattcaaaaaaatatttacaaatattaggaaatttaagtgtaaaaGAGTTGATAAatgattatattGGGACTATAATATAATTAAGgtcaaagaa	UA107	UB43	UC3	882541	885463	885463	S379, clpB, S380		new_882541_882635_1, SAOUHSC_00912, new_885279_885510_1
U461	-1	888531	291	M3	0.769230769230769	SigA	0.924075924075924	atttaattccctattttcaactaatGTGCATcgaataattataATTGTTAGAATTGAAAATATaccagtcattattataggccatttaatatttattccat	UA1	UB1	UC1	-1	-1	-1
U462	1	889923	1168	M4	0.643356643356643	SigA	0.999000999000999	tttatttttaaaaacaagtaaacaatttacatacttataatttttgaaaattttcaattTGTGTTATATTGATTTTGTaagatactttaactcacaaagga	UA172	UB6	UC4	889923	890427	890427	NA		SAOUHSC_00918
U463	-1	890896	878	M3	0.99000999000999	SigA	0.994005994005994	ttatttaaactgtataatatggtcaaaatatatgagatgtTACTATACAAatttctaacttTCACTTAAAATAAAATATATataattaaagtggaggtaga	UA75	UB1	UC1	890896	890554	890554	NA		SAOUHSC_00919
U464	1	891096	775	M3	0.849150849150849	SigA	0.999000999000999	taaaattttattaactagtcaatattcctacctctGACTTGAGTTtaaaaagtaatcTATGTTAAATTAATACCTGGtattaaaaattttattaagaaggt	UA3	UB1	UC1	891096	893334	893334	fabH, fabF		SAOUHSC_00920, SAOUHSC_00921
U465	1	892008	416	M4	0.785214785214785	SigA	0.998001998001998	tacttcagctgcgtcaatacctttaagtaTCGATCAagaattaaaaAATGGTAAAATCAAAGATGatgatacaattgttcttgtcggattcggtggcggcc	UA8	UB1	UC1	892008	893317	893317	fabF		SAOUHSC_00921
U466	-1	893812	873	M3	0.992007992007992	SigA	0.997002997002997	attttagaatttcaataaagctgaagaaattaaaaaaTCATTCCTCAatgtctgatttTAATGTAAACTATGCGTAAGagttttctataagtgggagtgat	UA75	UB1	UC1	893812	893478	893478	NA		SAOUHSC_00922
U467	1	893924	1084	M3	0.995004995004995	SigA	0.998001998001998	ttctaaaatcaatcattcttcattagtttaaagcaaaaaaATATTGATATatagtaaatattGTATATATAATATTAGTTAAgatttcagaaaattttgaa	UA6	UB5	UC5	893924	899709	899709	S382, oppB, oppC, oppD, oppF, oppA		new_893929_894010_1, SAOUHSC_00923, SAOUHSC_00924, SAOUHSC_00925, SAOUHSC_00926, SAOUHSC_00927
U468	-1	904732	1006	M4	0.585414585414585	SigA	1	ttttatatttaataaatcttgttggttcactggaaaaggagctattaatggcgctatAATTGATACAATAGTTATGAttaataaaaaaataaccgataaca	UA173	UB17	UC1	-1	-1	-1
U469	-1	906582	746	M3	0.604395604395604	SigA	0.999000999000999	tttgttagtagtaagttatacgtatattctaacaCATCTTACATttttaagaaatACTGTTATAATGATAATTATtaaaatattactaagaaagtaggcat	UA3	UB1	UC1	906582	905565	905565	trpS		SAOUHSC_00933
U470	1	906604	1211	M3	0.862137862137862	SigA	1	gcctactttcttagtaatattttaataattatcattataacaGTATTTCTTAaaaatgtaagaTGTGTTAGAATATACGTATAacttactactaacaaagg	UA130	UB6	UC4	906604	908328	908328	S383, S384, spxA, S385, S386, S387, mecA2		new_906611_906734_1, new_906736_906831_1, SAOUHSC_00934, new_907294_907399_1, new_907401_907493_1, new_907495_907597_1, SAOUHSC_00935
U471	-1	906636	22	M1	0.689310689310689	NM	0.693306693306693	aaaacctaatttttcagataagtttctacacttataaaaaagattattaatCcctttgttagtaGTAAGTTAtacgtatattctaacacatcttacatttt	UA39	UB22	UC8	-1	-1	-1
U472	1	906736	1102	M3	0.825174825174825	SigA	0.844155844155844	ttatctgaaaaattaggtttttcTCATTTAATtttaatgttagATAGTTATAATAAATAGTAAcgattaagaattttagaaaaaaatgttttttcttgatc	UA152	UB34	UC5	906736	908311	908328	S384, spxA, S385, S386, S387, mecA2		new_906736_906831_1, SAOUHSC_00934, new_907294_907399_1, new_907401_907493_1, new_907495_907597_1, SAOUHSC_00935
U473	1	907401	1358	M3	0.838161838161838	SigA	1	caaatgtgcaattgttaatatagctctatattagagtgtttTGGATGAAACatttgctatgaTAAGGTAAAATTAAATTAAGaaagtgctttaatgcttta	UA174	UB7	UC3	907401	908328	908328	S386, S387, mecA2		new_907401_907493_1, new_907495_907597_1, SAOUHSC_00935
U474	1	907495	71	M5	0.517482517482518	NM	0.533466533466533	tgctttaactgtataaatcatttaaatagttttgctacaacgaatatgttattataagttaccaaaatattttagagaaagaaatcaaacaaataaattgt	UA175	UB62	UC1	907495	908328	908328	S387, mecA2		new_907495_907597_1, SAOUHSC_00935
U475	1	909432	717	M4	0.989010989010989	SigA	0.997002997002997	attatttaaatatttgttcagataaaggtaatgacGTGCAAATTttgttctaAAATGAGAAAATTATATCAAttatattttattaggaggtttactacata	UA3	UB1	UC1	909432	911677	911677	pepF, S388, S389, S390		SAOUHSC_00937, new_911281_911366_1, new_911368_911465_1, new_911467_911719_1
U476	1	911368	56	M3	0.913086913086913	SigA	1	cagattgtgacaatttaaattaagtactattaaaAGGTTGAAATggtagagatagCATGTTATATTATGAACATGaaattaatcacataacaaacataccc	UA176	UB25	UC7	911368	911677	911677	S389, S390		new_911368_911465_1, new_911467_911719_1
U477	-1	912994	1195	M4	0.88011988011988	SigA	0.995004995004995	caaacaatataaattaaattggcaaatatgcatatttcTTTCAAATgtttaaaatCATGTTATATTAGTTATATattaacttaagttcgtaacagtaaatt	UA177	UB6	UC4	912994	911770	911770	S391, NA, yjbM		new_912887_912994_-1, SAOUHSC_00939, SAOUHSC_00938
U478	-1	913679	118	M3	0.982017982017982	SigA	1	gtcaaattaacattgataatagataaaggaaatTACTTTTAAAattcaactttgTCATTCATAATATAGTTAAGataaattgaatttgatacgaggtgtat	UA178	UB63	UC1	913679	911770	911770	NA, S391, NA, yjbM		SAOUHSC_00940, new_912887_912994_-1, SAOUHSC_00939, SAOUHSC_00938
U479	1	913785	667	M4	0.814185814185814	SigA	0.999000999000999	caatgttaatttgaccattaaaaatagtgttcgtaagtgttttgtattattgaatTGTGTTAAAATGTTATGGAataagaggaggattaagcatgcgttta	UA3	UB1	UC1	913785	920789	920789	NA, relQ, ppnK, NA, mgtE, NA, S392, S393, fabI		SAOUHSC_00941, SAOUHSC_00942, SAOUHSC_00943, SAOUHSC_00944, SAOUHSC_00945, SAOUHSC_00946, new_919754_919937_1, new_919939_920030_1, SAOUHSC_00947
U480	1	919939	724	M3	0.806193806193806	SigA	0.998001998001998	gactaaatcaaacatttatcgttgtaatacgtttaaataactttattaaaaagtcataaTAGTGTTAAAATGTATTGACgaataaaaagttagttaaaact	UA3	UB1	UC1	919939	920789	920789	S393, fabI		new_919939_920030_1, SAOUHSC_00947
U481	-1	921698	1240	M1	0.987012987012987	NM	0.991008991008991	acaaaaagaagcagagcaaattattaaattcgcactAGCTCAaatggataaattACCTGAagatgtaacaagtagaattacaaatatggttaaatcaatgg	UA136	UB52	UC2	921698	921664	921664
U482	-1	922127	530	M3	0.898101898101898	SigA	1	aatggttaatttaagtatatttaaaaaatattaACCTTTTTAAgcactgctattTAGGATATACTAAATAATAActaagtttagaaaaataggaggaacat	UA3	UB1	UC1	922127	920984	920984	NA		SAOUHSC_00948
U483	1	922387	1080	M3	0.998001998001998	SigA	1	catattaatatttataagaatattctgaaaaatATATTGAAGTgtctcgtgcttAATCGTATAATATTTTTATGtttaaacaatagggggaatcttatgat	UA6	UB5	UC5	922387	925634	925634	NA, S394, NA, NA		SAOUHSC_00949, new_923992_924094_1, SAOUHSC_00950, SAOUHSC_00951
U484	1	924096	1216	M3	0.702297702297702	SigA	1	gaaaagtattgagaattttaggtgctcagaaatttgAATTTTAAAAatatagtgtctCTTGGTACAATAACAATACAactactaggggcacttttttatgt	UA179	UB6	UC4	924096	925617	925634	NA, NA		SAOUHSC_00950, SAOUHSC_00951
U485	1	925040	1311	M4	0.959040959040959	SigA	1	aaatttgacgaaattgcaaaagatgtataatgaattatttttaatgtaacggttttcaaagaaaTTTGATATAATAGCAATAGgttaaacaaaggaggaat	UA4	UB3	UC3	925040	925634	925634	NA		SAOUHSC_00951
U486	1	928252	924	M3	0.96003996003996	SigA	0.97002997002997	tttataaagcaatttattgttctatgtttTATTTGTATAtttaaaattatcCAGTATACAATTATAGCATAtttttggaaacaattatgatattataccat	UA166	UB1	UC1	-1	-1	-1
U487	-1	928277	142	M4	0.771228771228771	SigA	0.998001998001998	tttacaattatggctcatcttaaattatTAAAAccatcttgtaaCATGGTATAATATCATAATtgtttccaaaaatatgctataattgtatactggataat	UA180	UB26	UC1	928277	925693	925693	S396, NA, ltaA		new_928051_928277_-1, SAOUHSC_00953, SAOUHSC_00952
U488	1	928286	678	M4	0.652347652347652	SigA	0.998001998001998	gtatatttaaaattatccagtatacaattatagcatatttttggaaacaatTATGATATTATACCATGTTAcaagatggttttaataatttaagatgagcc	UA3	UB1	UC1	928286	928439	932859	S397	murE, NA, prfC, S398, S399, NA	new_928286_928454_1	SAOUHSC_00954, SAOUHSC_00955, SAOUHSC_00956, new_931771_931849_1, new_931851_932071_1, SAOUHSC_00957
U489	1	928456	740	M3	0.998001998001998	SigA	0.998001998001998	agtaggatataacagtgaaattatAAATTTATTAacatcaacaaaACGTGTATAATAAACATATTgtagaaaaaggagcggttcagtttggatgcaagtac	UA3	UB1	UC1	928456	932859	932859	murE, NA, prfC, S398, S399, NA		SAOUHSC_00954, SAOUHSC_00955, SAOUHSC_00956, new_931771_931849_1, new_931851_932071_1, SAOUHSC_00957
U490	1	931851	811	M3	0.994005994005994	SigA	1	atttgttacattaaaaataattgtttcgttgaagaaaaatAAATTGTATAttttaaaagaaAAAGGTATACTATGATGTATcaaatgaataacctatggca	UA3	UB1	UC1	931851	932876	932876	S399, NA		new_931851_932071_1, SAOUHSC_00957
U491	1	933080	554	M4	0.753246753246753	SigA	0.991008991008991	ttttcaatagaaattatatagattttaAAGCAAAttaggtgttaaTGTGTCATAATGATAAGTGattttattgaatggagtggacattagtggatattggt	UA3	UB1	UC1	933080	936735	936735	htrA, NA		SAOUHSC_00958, SAOUHSC_00959
U492	1	936905	307	M4	0.794205794205794	SigA	1	tgcttttttagtttgtatttttaacttattttataAGACGAttggtttcgaaAATGGTAAACTAGTAACAAtgagaggtgtaacatgatggaaaaaaatga	UA1	UB1	UC1	936905	938452	938452	NA		SAOUHSC_00960
U493	-1	938834	104	M3	0.639360639360639	SigA	1	aatatagtgtaaatgttctgcatatttttttaaggtatCTATTGCAAAttaacttaatCTTGTTATAATAATATTTGTgcttgatattcaaacacatacaa	UA181	UB42	UC1	-1	-1	-1
U494	-1	939565	1063	M3	0.954045954045954	SigA	1	aaattattgtacattttcaccaaaataatAACTTGACAActcagaatttTATTATAAAATATATTTATAtcattaattgtatttttatattaatggtttaa	UA83	UB5	UC5	939565	939004	939004	S400, comK		new_939461_939565_-1, SAOUHSC_00961
U495	1	939665	1106	M3	0.999000999000999	SigA	1	ggtgaaaatgtacaataatttttaactaatagtcagaatatTCATTGATTTcaaaattagaaAAATGTATACTTATTATAAAttaaagaaaggtagtggtt	UA134	UB51	UC5	939665	939931	939931	NA		SAOUHSC_00962
U496	-1	941029	625	M3	0.757242757242757	SigA	0.77022977022977	atttagaatgatttgtgagtatataattggcattttgagcaaagttaaggcataAATAAGTAGAGaatatatatagatataagggagagattgtaatgaaa	UA3	UB1	UC1	941029	940092	940092	NA		SAOUHSC_00963
U497	1	941150	807	M3	0.999000999000999	SigA	1	atcggcttaaagttacattttattatttttgattgttaaTAGTTTATTTgttaagtgaatTTTAGTACAATATAATTTAGttatgatttaaggaggactta	UA3	UB1	UC1	941150	941971	941971	NA, NA		SAOUHSC_00964, SAOUHSC_00965
U498	1	942141	1469	M4	0.802197802197802	SigA	0.995004995004995	tattttttaacagcaagcggttattattgagattaggttttagtcagtttttatTACTAAATattttataaaAATGGTATAATATTTTTGAgcaagttgaa	UA182	UB7	UC3	942141	942311	942311	S402, NA		new_942141_942256_1, SAOUHSC_00966
U499	-1	942878	435	M3	0.998001998001998	SigA	0.999000999000999	aatagtcaaggttaatttatttgctgcaaatttcaacCACTTTATGTtaaatggacatCAAAGTATAATTGTATTATTattaaattgtgcagtgtataaat	UA14	UB1	UC1	942878	941792	941792	S401		new_941748_942863_-1
U500	1	942955	1081	M3	0.996003996003996	SigA	0.996003996003996	taaagtggttgaaatttgcagcaaataaattaACCTTGACTAttttcagaaaaTTCTGTATAAATAACGAAAAagagatatggattaaatatgaagaggtg	UA6	UB5	UC5	942955	946255	946255	S403, NA, NA, NA		new_943005_943329_1, SAOUHSC_00968, SAOUHSC_00969, SAOUHSC_00970
U501	-1	946665	457	M3	0.96003996003996	SigA	0.992007992007992	tataaatataccaactaccaaaaacaattCAATTTAATTtcaaattcttcTACCGCACAATTTAATTTTAttgtataatgtatttaaaatgattgttttac	UA93	UB1	UC1	946665	946348	946348	NA		SAOUHSC_00971
U502	1	946866	462	M3	1	SigA	1	aaataattataataacaatatttaattattgtatttaCAGTTGATTAatagcgttgtgAAGTATAAAATTATTTTGTAaaacaattttgttattaagaggt	UA3	UB1	UC1	946866	948635	948635	NA, NA, NA		SAOUHSC_00972, SAOUHSC_00973, SAOUHSC_00974
U503	-1	949183	799	M3	1	SigA	1	aatatttaataaatatttaataattaatcttataaaaaATCTTTACTTtccacatgtttACAAATATAATTTGGACTATgttttaaaaatatgaatgttgg	UA3	UB1	UC1	949183	948745	948745	NA		SAOUHSC_00975
U504	1	949578	1225	M4	0.975024975024975	SigA	1	actatgataagaaaaaataataatcccctaaATACATTATaaacaaattaAATGATAAAATAATAATATatatttctactaaagttgtttggaggtaaatg	UA183	UB24	UC4	949578	949859	949859	NA		SAOUHSC_00976
U505	-1	950785	1363	M2	1	SigB	1	gttatattatattccctaaaaattaaattgtgacaatgACGTTTAAaaagcatatatgaatGGGTATATAgttcgtaagatatagagaaatgaggtatgta	UA76	UB7	UC3	950785	950632	950632	NA		SAOUHSC_00977
U506	-1	951069	153	M3	0.994005994005994	SigA	0.996003996003996	acttataattttagaaagtttgaaaattctaaagttagaaATATTGGTTTtcacaacgaatTTAAGTAGAATTATAGTTAAggaggatttacaaatgaaag	UA184	UB26	UC1	951069	950632	950632	NA, NA		SAOUHSC_00978, SAOUHSC_00977
U507	1	951151	249	M3	0.944055944055944	SigA	1	tctaactttagaattttcaaactttctaaaattataagtatatCTTTTTAAAAtaagctagaatTTCTATATAATAAATGTTAAtaacgtaaaagggaatg	UA16	UB1	UC1	951151	951729	951729	NA		SAOUHSC_00979
U508	1	952766	500	M3	0.988011988011988	SigA	0.989010989010989	ttaactgtagaatattgctgatattgattacTCATTGAATAcaaaacctcttTAAATCATATTTTTTATAACaaagatattttaatagaaagtagcataaa	UA3	UB1	UC1	952766	957543	957543	S404, NA, S405, NA, menD, NA, menB		new_952766_952866_1, SAOUHSC_00981, new_952996_953071_1, SAOUHSC_00982, SAOUHSC_00983, SAOUHSC_00984, SAOUHSC_00985
U509	-1	952789	839	M3	0.94005994005994	SigA	1	gaattgcttaaacttatcttgcaatttttcacgtCAATTGACCTttatgctacttTCTATTAAAATATCTTTGTTataaaaaatatgatttaaagaggttt	UA3	UB1	UC1	952789	951805	951805	menA		SAOUHSC_00980
U510	1	952868	481	M4	0.859140859140859	SigA	0.996003996003996	gtcaattgacgtgaaaaattgcaagataagtttaagcaattcttgTAACACAattatccaaaAATGATACAATATAATAATgagtgaaaaaagacgaagaa	UA3	UB1	UC1	952868	957543	957543	NA, S405, NA, menD, NA, menB		SAOUHSC_00981, new_952996_953071_1, SAOUHSC_00982, SAOUHSC_00983, SAOUHSC_00984, SAOUHSC_00985
U511	-1	959591	218	M1	0.502497502497502	NM	0.702297702297702	aatttaatggtgcggtatttattaatgaaaatgtacgcaacttcttaaaacaaaatATtgaagatatccattttgccaacgatgaccaacctaataaccca	UA185	UB15	UC1	959591	959472	959472
U512	-1	960462	219	M3	0.976023976023976	SigA	1	ttacaaaaactttttaatttatttatatattcTTATTGACTTaaaaatttttAGTGTTATATTTAACTTGTAaataaattttttggaggtttttagatgaa	UA185	UB15	UC1	-1	-1	-1
U513	-1	962166	1093	M4	0.924075924075924	SigA	1	ttttcgtttttcaaataaagcttaagtaatttacccttttttgctttaaaagTATGTTATGATATTATTAAtttctaaatttttagacaatatttgattta	UA6	UB5	UC5	962166	960968	960968	NA		SAOUHSC_00989
U514	-1	963360	660	M3	0.764235764235764	SigA	0.996003996003996	ttataatttttacaatactattcgacacaatagacaaatTTGTTGCATAactaatacaaaaTATAATAAATTAGTAAGAGTcttatggacataaaggagat	UA3	UB1	UC1	963360	961172	961172	NA, NA		SAOUHSC_00991, SAOUHSC_00989
U515	1	963425	985	M3	0.993006993006993	SigA	0.999000999000999	tattagttatgcaacaaatttgtctattgtgtcgaataGTATTGTAAAaattataaaaaAAGCATATAATATTATAAATaatatgtagtggagtagaacaa	UA186	UB33	UC1	963425	963918	963918	NA		SAOUHSC_00992
U516	-1	967899	1052	M4	0.577422577422577	SigA	0.964035964035964	aagagtatattacaaattggttaaatacgcacaggtatataaaacaGGTACTATAATGTTAGTAAtaattaataaatgttaggagtaataaatagaatggc	UA187	UB40	UC5	967899	964079	964079	atl		SAOUHSC_00994
U517	-1	968165	1376	M2	0.998001998001998	SigB	0.998001998001998	gtagctactatgaatgcccaatgtcatgctatcccattttatgaAAGTTTAAactttaaaatgagaGGTAATATAtttcttgaggaaggcatcgagcatat	UA12	UB7	UC3	968165	964079	964079	S406, atl		new_967901_968090_-1, SAOUHSC_00994
U518	-1	968574	608	M4	0.506493506493506	SigA	0.997002997002997	ttatagcttttttatgtctaattatttttgaggaaaataacaatcgttattcTATGTTATTATTAGTAAATTaaatgtaaatgattttgttaggatgtgga	UA3	UB1	UC1	968574	967921	964079	NA, S406	atl	SAOUHSC_00995, new_967901_968090_-1	SAOUHSC_00994
U519	-1	970525	622	M3	0.962037962037962	SigA	1	acattcaaattacaaggaactttgacataacatttgtatttttTACTATAAAGtactacaatttAAGGCTATAATGTATTAGTAatgaagttgtataaata	UA3	UB1	UC1	970525	968686	968686	S407, NA, NA		new_970416_970525_-1, SAOUHSC_00997, SAOUHSC_00996
U520	1	970665	368	M3	0.993006993006993	SigA	0.998001998001998	atttttaaaaatataatgcgactttagtATGATGTCTTaaaaaatttaaAGGCGTAATATAAATTCGAGtgatttatacaaagtgataaggtataattaat	UA60	UB1	UC1	970665	972044	972044	S408, fmtA		new_970701_970865_1, SAOUHSC_00998
U521	1	970701	854	M3	0.99000999000999	SigA	1	ttaaaaaatttaaaggcgtaatataaattCGAGTGATTTatacaaagtgaTAAGGTATAATTAATTTTGTtgtatagataacatattagaaaaacttatta	UA3	UB1	UC1	970701	972044	972044	S408, fmtA		new_970701_970865_1, SAOUHSC_00998
U522	1	976592	15	M1	0.982017982017982	NM	0.989010989010989	ccaaataatagaagcaaagacttaaattttgacacttttttgaCCTCCTaatactacaaatGTAgggcttaacattaattttaagttattacacaatattt	UA72	UB22	UC8	-1	-1	-1
U523	-1	976621	782	M3	0.981018981018981	SigA	0.997002997002997	tcaacatttttgatacaattttattaatttttttcccataagCCCTTGTAAAtattgtgtaaTAACTTAAAATTAATGTTAAgccctacatttgtagtatt	UA3	UB1	UC1	976621	972596	972596	qoxA, qoxB, qoxC, qoxD		SAOUHSC_01002, SAOUHSC_01001, SAOUHSC_01000, SAOUHSC_00999
U524	-1	977537	867	M3	0.978021978021978	SigA	0.998001998001998	tatttcctcattatttataaatttATATTTAAATttcattctttaTAGGGTAAGATTAGGACTATagtatgatgtgtaaataatataaattaaggtatagt	UA75	UB1	UC1	977537	977135	977135	S409, NA		new_977456_977537_-1, SAOUHSC_01005
U525	1	979254	362	M3	0.938061938061938	SigA	1	taaattcaaataaaaaatcaaaataaagttcgattttTGATTGAAAAagcagaaattgCTTGTTATGCTATATCTATAatatacaactaaagtaattcaca	UA188	UB1	UC1	979254	990557	990557	S413, purE, purK, purC, purS, purQ, purL, purF, purM, purN, purH, purD		new_979252_979384_1, SAOUHSC_01008, SAOUHSC_01009, SAOUHSC_01010, SAOUHSC_01011, SAOUHSC_01012, SAOUHSC_01013, SAOUHSC_01014, SAOUHSC_01015, SAOUHSC_01016, SAOUHSC_01017, SAOUHSC_01018
U526	-1	979287	1275	M3	0.99000999000999	SigA	0.999000999000999	ctgcccataatgactgctactttcactttgtacaccctttcaaaAGTTTGAATTgtgaattactttAGTTGTATATTATAGATATAgcataacaagcaatt	UA189	UB3	UC3	979287	977135	977135	S412, folD, S411, S410, S409, NA		new_979122_979277_-1, SAOUHSC_01007, new_977978_978260_-1, new_977539_977976_-1, new_977456_977537_-1, SAOUHSC_01005
U527	-1	990684	113	M1	0.802197802197802	NM	0.856143856143856	acaaaagaggtgccacaaacatgttattttgttcatCCAAACatgttgtggcgCCTCTtttgtattacatatgcataatcacaaatttggtacagaaatca	UA190	UB64	UC1	990684	990633	990633	S414		new_990586_990684_-1
U528	-1	993815	114	M3	0.999000999000999	SigA	0.999000999000999	attttaaatcgaattaaacgaaatttcatgaagacaacCTATTGACATaagtttacaaaCGTCTTACAGTATAATTAATtaaataaatcgcacacactagg	UA190	UB64	UC1	993815	990752	990752	S416, NA, NA, NA, S415		new_993611_993812_-1, SAOUHSC_01022, SAOUHSC_01021, SAOUHSC_01019, new_990714_990820_-1
U529	1	994178	1495	M1	0.999000999000999	NM	0.999000999000999	aaggaaggagagggatacatgcgccgagcacatgcataaaatCccctaacaactaaaagTTGTaaggggatttaaattaatttagtgtatcttggatatct	UA90	UB23	UC9	994178	994314	994314
U530	1	994352	1032	M2	0.998001998001998	SigB	0.998001998001998	tttctgctgcttttttattttgattttcattagacATGATTAAttcctcccaaattGGATAATTAtttatatataaatcttacccggttgtactttcgtta	UA154	UB10	UC5	994352	995776	995776	S417, NA		new_994357_994448_1, SAOUHSC_01025
U531	-1	994370	1432	M2	0.999000999000999	SigB	0.999000999000999	gataaatgaataaatagtgctatagacttagaaAAGTTTAAcgaaagtacaaccGGGTAAGATttatatataaataattatccaatttgggaggaattaat	UA12	UB7	UC3	994370	994220	994220	NA		SAOUHSC_01024
U532	1	994450	276	M3	0.998001998001998	SigA	1	ttaaacttttctaagtctatagcactatttattcatttatCTAAAGACAAcaacattagatTAATATATAATGATTTTGAGgtgaacataatgtcttttct	UA99	UB1	UC1	994450	995776	995776	NA		SAOUHSC_01025
U533	1	997376	1022	M2	0.991008991008991	SigB	0.991008991008991	ccacattataagccatctaaatatttaaaagctgtttttgtaaatattAGACATTaatttgataaaaagGGGTATAGTaacttattgagaaaaagaagggt	UA125	UB10	UC5	997376	1000111	1000128	NA, S419, ptsH, ptsI		SAOUHSC_01027, new_997983_998121_1, SAOUHSC_01028, SAOUHSC_01029
U534	1	997983	442	M4	0.95004995004995	SigA	0.998001998001998	agatcacattcaaaaatgcgaaaatgttattaaaaatgtcatgtaGGTGCTATAATAGTTTTGCaatttgcaaattttactgaaaccggttttaaacgaat	UA93	UB1	UC1	997983	1000128	1000128	S419, ptsH, ptsI		new_997983_998121_1, SAOUHSC_01028, SAOUHSC_01029
U535	1	1000400	1024	M2	0.706293706293706	SigB	0.706293706293706	tgaaaattaatcttggatatttaatactttgtTGATTTCatcaagatcaacATGGTACATTggattgccattcaacaaaataaacggagttgaaaaagcat	UA18	UB10	UC5	-1	-1	-1
U536	-1	1000629	260	M3	0.997002997002997	SigA	0.999000999000999	gctatgaaattgtgtataatttatgtcagttcacaatgtgttcacaAATTTGAATTtcaatgtataaTTGTGTATATTACATTAGAAtaaagcacgaagga	UA10	UB1	UC1	1000629	1000204	1000204	NA, S420		SAOUHSC_01030, new_1000162_1000345_-1
U537	1	1000716	514	M3	0.976023976023976	SigA	0.977022977022977	gtgaactgacataaattatacacaatttcatagcgcataaTGTTTTAAAAatacacattataGCAATTATAATTAAGTTCATtgtgttgtcatcaaaaaaa	UA3	UB1	UC1	1000716	1004225	1004225	cydA, cydB, S421, trkA, S422		SAOUHSC_01031, SAOUHSC_01032, new_1003155_1003286_1, SAOUHSC_01034, new_1004123_1004265_1
U538	1	1003103	947	M3	0.965034965034965	SigA	0.999000999000999	gacattagtgattgtctttattttaggttTACTTTTATTacttccatcgttAATATTATTATTAAGATTATttgttttcgacaaagaatatgttgaaggaa	UA103	UB38	UC1	1003103	1004208	1004208	S421, trkA, S422		new_1003155_1003286_1, SAOUHSC_01034, new_1004123_1004265_1
U539	1	1003291	1320	M2	1	SigB	1	aattttaaatttatattttcaatgaattgatgaaaaTCATTTAAtggagggcgagtatGGGTAAAGAatatgtagtcatcggtctaggtcgttttggaggt	UA74	UB13	UC3	1003291	1004208	1004208	trkA, S422		SAOUHSC_01034, new_1004123_1004265_1
U540	-1	1006414	526	M3	1	SigA	1	tattcgaaatacttagatttctagtgagataaacTGCTTTATTTattatcattcaTCATGTAAAATAAGATTTAActgaaattttagtgttatttcactaa	UA3	UB1	UC1	1006414	1004301	1004301	NA, NA, rnjA		SAOUHSC_01037, SAOUHSC_01036, SAOUHSC_01035
U541	1	1007304	683	M3	0.926073926073926	SigA	0.999000999000999	atatattgcaccttccttattttaatttgtttTAGTTGAATGacagtaaaaagGTTGTTAAGATACTCATACAtttttatgtgtaaatatctacaaagtta	UA3	UB1	UC1	1007304	1008339	1013762	S424, NA, S425	pdhA, pdhB, S426, pdhC, pdhD, S427, NA	new_1007302_1007572_1, SAOUHSC_01039, new_1008248_1008342_1	SAOUHSC_01040, SAOUHSC_01041, new_1010501_1010590_1, SAOUHSC_01042, SAOUHSC_01043, new_1013340_1013437_1, SAOUHSC_01044
U542	-1	1007484	661	M3	0.939060939060939	SigA	1	aacaattacattacacatcttcattactaagtatatCTGTTGACAGttacgtcattTATAATATAATTTTTAAAGTcaagatgataaataaatttctaaag	UA3	UB1	UC1	1007484	1006562	1006562	S423, def		new_1007246_1007480_-1, SAOUHSC_01038
U543	1	1007574	551	M3	0.997002997002997	SigA	1	cttagtaatgaagatgtgtaatgtaattgtttaAAATTGATTTccaagcagattTTATTTATCATTTAATTTAAatagcaagtggaggtacaagtaatgaa	UA3	UB1	UC1	1007574	1008339	1013762	NA, S425	pdhA, pdhB, S426, pdhC, pdhD, S427, NA	SAOUHSC_01039, new_1008248_1008342_1	SAOUHSC_01040, SAOUHSC_01041, new_1010501_1010590_1, SAOUHSC_01042, SAOUHSC_01043, new_1013340_1013437_1, SAOUHSC_01044
U544	1	1008344	244	M4	0.535464535464535	SigA	1	ctgtatctttttttattaaaacagaactttttcaaatggTTTAACAgtcccatttattTGTGGTACAATTAGTAAGGAtaaaatgaatttctatacaatta	UA155	UB1	UC1	1008344	1013762	1013762	pdhA, pdhB, S426, pdhC, pdhD, S427, NA		SAOUHSC_01040, SAOUHSC_01041, new_1010501_1010590_1, SAOUHSC_01042, SAOUHSC_01043, new_1013340_1013437_1, SAOUHSC_01044
U545	-1	1008364	16	M1	0.962037962037962	NM	0.978021978021978	ttgtaacttaggagccattcaattcaccatacctttcccataattgtatagaaattcattttatccttactaattgtaccacaaataaatgggactgttaa	UA72	UB22	UC8	-1	-1	-1
U546	1	1013439	946	M3	0.4995004995005	SigA	0.917082917082917	attgatttgagatatcgttaacatgtgacatgCATGTTATACTAGCGATGCtaataaaagaattgaaatggagggttcaacaatggaatatgagtatccaa	UA103	UB38	UC1	1013439	1013762	1013762	NA		SAOUHSC_01044
U547	1	1013810	501	M3	0.979020979020979	SigA	0.993006993006993	aacacaatttaataggaatttttctttaaaaCTATTGCTAAtaaagctatatTTTGATACCTTTATCAAGTGttaaacaaaatgtttgataaaagtaaact	UA3	UB1	UC1	1013810	1018233	1019287	S428, NA, potA, potB, potC, potD	NA	new_1013810_1013879_1, SAOUHSC_01045, SAOUHSC_01046, SAOUHSC_01047, SAOUHSC_01048, SAOUHSC_01049	SAOUHSC_01050
U548	1	1017693	1428	M2	0.994005994005994	SigB	0.994005994005994	accaaattttactagttgacggtgctagagagattatAGGCATGAgtttgaataaacttGGGTATAATcttaatgaccgtaattcgcaccatttaaaagaa	UA12	UB7	UC3	1017693	1019287	1019287	NA		SAOUHSC_01050
U549	1	1018239	1248	M3	0.959040959040959	SigA	0.998001998001998	tgaatttcaaaatgtcattaaaataaaatcataaaTAGTAGTTATttactgtatatTTAGTTATAATAACGGGATAagtactataaggagttgtaacgaat	UA191	UB43	UC3	1018239	1019287	1019287	NA		SAOUHSC_01050
U550	1	1019493	887	M4	0.958041958041958	SigA	0.999000999000999	tacacctaaattatcatcaatctgaattcagatgtttattataaaaattagatgaaaaaTATGTTAATATACAAGTAAtttaatgtgcgtatatctatagg	UA75	UB1	UC1	1019493	1020001	1020001	S429, NA		new_1019491_1019579_1, SAOUHSC_01051
U551	-1	1022271	563	M4	0.998001998001998	SigA	1	atgataaaaatgaaaatactaattttaatgagagcgtcttaagCCGCAATTGataaaacaTATGCTACAATATTTTTAAacactatacaggaggtactcta	UA3	UB1	UC1	1022271	1021709	1021709	NA		SAOUHSC_01054
U552	1	1022354	1004	M3	0.98001998001998	SigA	1	gacgctctcattaaaattagtattttcatttttatcataaGAAGTTATTTttataaaatgtTGATGTATAATAAAGATGTTaggagatgatgttatggcac	UA192	UB17	UC1	1022354	1023197	1023197	NA		SAOUHSC_01055
U553	1	1023452	407	M4	0.523476523476524	SigA	0.983016983016983	attttttctttgtagtaaatccaattccaaaggTTGCAACgagtaatataAATGTTAAAATCATCATTGGtacatttgatgcaccaacagcaaaactaaat	UA20	UB1	UC1	1023452	1023605	1025509		typA		SAOUHSC_01058
U554	1	1023608	647	M4	0.912087912087912	SigA	1	ttttttgtttcatcctatccccaccttttgcTTATCTTttctcaattaTATGATATAATAAAAAAGTtgtaattaaaagtgggattttacttaagaaagaa	UA3	UB1	UC1	1023608	1025509	1025509	typA		SAOUHSC_01058
U555	-1	1023610	1475	M3	0.937062937062937	SigA	0.989010989010989	attagtcatataaatagtttccttctttcttaagtaaaatccCACTTTTAATtacaactttttTATTATATCATATAATTGAGaaaagataagcaaaaggt	UA193	UB7	UC3	1023610	1023358	1023358	S431		new_1023327_1023610_-1
U556	-1	1026338	447	M4	0.992007992007992	SigA	1	gtttatcttactaaatattaaaaagcaagtagatttaaaatgtgtcgttagcaattTGTGTTAAAATAATGCTATatacattgatagggagtgggaaaatg	UA93	UB1	UC1	1026338	1025568	1025568	NA, NA, S432		SAOUHSC_01061, SAOUHSC_01060, new_1025541_1025648_-1
U557	1	1026394	901	M3	0.992007992007992	SigA	1	tttaacacaaattgctaacgacacattttaaatcTACTTGCTTTttaatatttagTAAGATAAACTTTTAGTAAGacttgagaatttatatagagggggag	UA75	UB1	UC1	1026394	1028314	1028314	NA, S433, S434, NA		SAOUHSC_01062, new_1026717_1026824_1, new_1026826_1027029_1, SAOUHSC_01063
U558	1	1028518	580	M4	0.671328671328671	SigA	0.999000999000999	taattataactaaattttatgactaaaaattactaaatgtggTGGCGAAattagaatcatGATGATAAGATAAAGTTATcgctattgataataaatgttga	UA3	UB1	UC1	1028518	1032258	1032258	S436, pycA		new_1028518_1028754_1, SAOUHSC_01064
U559	1	1028756	1166	M3	0.893106893106893	SigA	1	aatgttaaattttgaaaatttgaaacataaCTATAGCAAAacagagcgcttTAAGATAAAATTTTATTATCtaattagttagaaaattctaatagtttgag	UA194	UB53	UC4	1028756	1032258	1032258	pycA		SAOUHSC_01064
U560	-1	1033603	852	M4	0.863136863136863	SigA	1	ttaacgacaagagaaaatgtcaattttgtgacacaaataacatttaatttATTGCTATAATGTATATGTtagaaaattttaataagtagaatcatgcatct	UA3	UB1	UC1	1033603	1032402	1032402	S437, ctaA		new_1033473_1033603_-1, SAOUHSC_01065
U561	-1	1033692	344	M3	0.994005994005994	SigA	0.999000999000999	aatccccctccttaaatttgttcatataagattatgatatcttAGATTGCATAaaaagactaggTTTAATAAAATTAAATTGTGacaaattaacgacaaga	UA195	UB1	UC1	1033692	1032402	1032402	S438, S437, ctaA		new_1033605_1033694_-1, new_1033473_1033603_-1, SAOUHSC_01065
U562	1	1033717	818	M3	0.993006993006993	SigA	1	tcgttaatttgtcacaatttaattttattaaACCTAGTCTTtttatgcaatcTAAGATATCATAATCTTATAtgaacaaatttaaggagggggattatgag	UA3	UB1	UC1	1033717	1036950	1036950	ctaB, NA, S439, NA, S440, NA, NA		SAOUHSC_01066, SAOUHSC_01067, new_1035151_1035242_1, SAOUHSC_01068, new_1035566_1035692_1, SAOUHSC_01069, SAOUHSC_01070
U563	1	1035315	1203	M4	0.915084915084915	SigA	0.994005994005994	gtccatttttttatacatattttaatcttaataatgaaattcaacctgaaaacataaagaTAGGTTATGATATAGAGTGtagggaaaatctttatgacgtt	UA46	UB6	UC4	1035315	1036950	1036950	NA, S440, NA, NA		SAOUHSC_01068, new_1035566_1035692_1, SAOUHSC_01069, SAOUHSC_01070
U564	1	1038072	679	M3	0.947052947052947	SigA	1	gaaatgtgtggttaatcatatagtgatgctcttgaGAATTGAATTaatataatgatgTTTAATATAATCTAAATACAtttatcgagcaattacataagaca	UA3	UB1	UC1	-1	-1	-1
U565	1	1038158	653	M3	0.592407592407592	SigA	0.999000999000999	caattacataagacataattaaggtagcttaATATTTTAAAattaataaagaCATGATATGATTAATGCTGAaaataaatggagtgaggtttaaatgaatt	UA3	UB1	UC1	1038158	1041217	1042067	NA, S442, rsmD, coaD, S443	NA, S444, rpmF	SAOUHSC_01072, new_1038447_1038979_1, SAOUHSC_01074, SAOUHSC_01075, new_1039953_1041150_1	SAOUHSC_01077, new_1041820_1041898_1, SAOUHSC_01078
U566	-1	1038879	402	M3	0.916083916083916	SigA	0.998001998001998	ttacttttatgtttacctgcaatgacgcgcatgttgttcaCACTTCCAATtcatttagttaTTTAATATAATTTATTGAGAaaaaggagaatgataaacca	UA20	UB1	UC1	1038879	1037060	1037060	NA, S441, NA		SAOUHSC_01073, new_1037954_1038448_-1, SAOUHSC_01071
U567	1	1041152	488	M3	0.934065934065934	SigA	0.944055944055944	ttatgaaagggattatattctgtgattaagccaacgcttttCATTTGCAATtcgtcctttcgGTATTCATTATTAATATTGTaacagaacatgatatgtta	UA3	UB1	UC1	1041152	1042067	1042067	NA, S444, rpmF		SAOUHSC_01077, new_1041820_1041898_1, SAOUHSC_01078
U568	-1	1041174	668	M3	0.677322677322677	SigA	1	tttattttaactttctaagaacaagttgtcaagaTTTTTTCTTAacatatcatgtTCTGTTACAATATTAATAATgaataccgaaaggacgaattgcaaat	UA3	UB1	UC1	1041174	1041072	1041072	NA		SAOUHSC_01076
U569	1	1041227	773	M3	0.999000999000999	SigA	1	atattgtaacagaacatgatatgttaagaaaaaATCTTGACAActtgttcttagAAAGTTAAAATAAATTTTGTgcttgttagaggtgaagccatatgaaa	UA3	UB1	UC1	1041227	1042067	1042067	NA, S444, rpmF		SAOUHSC_01077, new_1041820_1041898_1, SAOUHSC_01078
U570	-1	1042109	1518	M1	1	NM	1	tccagttacctcgttcgccaattatttttcgcaatataaaaaGTCCCACTtaaaacaatCATTTTaagcgggactttttatattgagtaactaaaattatt	UA101	UB41	UC9	1042109	1042007	1042007
U571	-1	1044229	193	M3	0.997002997002997	SigA	1	ataacataggttattttttttataaaataACGTTGCAATtaactaacatttCAATGTACAATACAAGTAATcaattgataatgattatcagttgataatat	UA25	UB14	UC1	1044229	1042211	1042211	isdB		SAOUHSC_01079
U572	-1	1045500	194	M3	0.857142857142857	SigA	1	tgtcaatatttattttataatcaatttaTTATTGTTATacgaaaatagaTGTGCTAGTATAATTGATAAccattatcaattgcaatggttaatcatctcat	UA25	UB14	UC1	1045500	1044353	1044353	S446, isdA		new_1045421_1045500_-1, SAOUHSC_01081
U573	-1	1045560	195	M3	0.79020979020979	SigA	0.966033966033966	cctcctttttatgattgcttttaagtctttagtaaaatcataaataataatgATTATCAttgtcaatattTATTTTATAATCAATTTATTattgttatacg	UA25	UB14	UC1	-1	-1	-1
U574	1	1045572	196	M3	1	SigA	1	tctattttcgtataacaataataaattgattataaaataaATATTGACAAtgataatcattaTTATTTATGATTTTACTAAAgacttaaaagcaatcataa	UA25	UB14	UC1	1045572	1055327	1055327	isdC, isdD, isdE, isdF, NA, S447, srtB, isdG, NA, S448, S449, NA, S450, S451, pheS, pheT		SAOUHSC_01082, SAOUHSC_01084, SAOUHSC_01085, SAOUHSC_01086, SAOUHSC_01087, new_1049241_1049301_1, SAOUHSC_01088, SAOUHSC_01089, SAOUHSC_01090, new_1050523_1050614_1, new_1050616_1050761_1, SAOUHSC_01091, new_1051503_1051800_1, new_1051802_1051882_1, SAOUHSC_01092, SAOUHSC_01093
U575	1	1050616	298	M3	0.992007992007992	SigA	0.997002997002997	tttgatttattttgaagaagaaaagaattaATAATGATATtttggggcgtaTGATTTATAGTAGTAGTATCgataaaagaaatttatacaatttgaaatat	UA1	UB1	UC1	1050616	1055327	1055327	S449, NA, S450, S451, pheS, pheT		new_1050616_1050761_1, SAOUHSC_01091, new_1051503_1051800_1, new_1051802_1051882_1, SAOUHSC_01092, SAOUHSC_01093
U576	-1	1056508	656	M4	0.774225774225774	SigA	1	gtaagtatccgcaattaattctttacaacatacataaatgttTCTGACGTtattatcattTATGATATGATTATTTTTGctaaagacaatgaaattttatg	UA3	UB1	UC1	1056508	1055641	1055641	rnhC		SAOUHSC_01095
U577	1	1056585	333	M3	1	SigA	1	gaaacatttatgtatgttgtaaagaattaattgcggaTACTTACAAAatacatagtggTCATGTATAATGTTTATGAAaatgttatagtgacacaatttaa	UA1	UB1	UC1	1056585	1064116	1064116	S452, NA, NA, NA, mutS2, S453, trxA, S454, uvrC		new_1056585_1056821_1, SAOUHSC_01096, SAOUHSC_01097, SAOUHSC_01098, SAOUHSC_01099, new_1061787_1061926_1, SAOUHSC_01100, new_1062274_1062633_1, SAOUHSC_01102
U578	1	1061787	1208	M3	0.995004995004995	SigA	0.999000999000999	tggcgttaccgttgcaacactaaaataaattatAATTTGATAAattaaatagctGCAGTTAAAATAATGTAAAGcaacaagaatacatttcaaacatgtta	UA167	UB6	UC4	1061787	1062229	1062229	S453, trxA		new_1061787_1061926_1, SAOUHSC_01100
U579	1	1063946	1410	M2	1	SigB	1	gcgttttaaacgaaggattaccattaccTGATTTAataatagtagatggTGGTAAAGgacatatgaacggggttattgatgtgctacaaaacgaattaggt	UA12	UB7	UC3	1063946	1069998	1070015	S455, sdhC, sdhA, sdhB, S456, murI, NA, NA		new_1064401_1064669_1, SAOUHSC_01103, SAOUHSC_01104, SAOUHSC_01105, new_1067935_1068112_1, SAOUHSC_01106, SAOUHSC_01107, SAOUHSC_01108
U580	1	1064401	1279	M4	0.97002997002997	SigA	1	aaataaattactgggcgtgagaatcattctcatgCCCCAAAATatatgaaatAATGTTACAATATGGTTAAcaaagttatttttttgaatgtacgtggaag	UA36	UB3	UC3	1064401	1070015	1070015	S455, sdhC, sdhA, sdhB, S456, murI, NA, NA		new_1064401_1064669_1, SAOUHSC_01103, SAOUHSC_01104, SAOUHSC_01105, new_1067935_1068112_1, SAOUHSC_01106, SAOUHSC_01107, SAOUHSC_01108
U581	1	1068114	129	M4	0.867132867132867	SigA	1	attataatgacaaaaatggtaaacacagtgcataataCTAAAATCCaatgcttagtTATGATAAACTAAAAATTAaattaaaagtaaggatgaccgaatat	UA196	UB26	UC1	1068114	1070015	1070015	murI, NA, NA		SAOUHSC_01106, SAOUHSC_01107, SAOUHSC_01108
U582	-1	1068711	1374	M2	0.999000999000999	SigB	0.999000999000999	acgaaatcactgtctttttaccaccaaaataatcatagatAGGTTTATagagcaatggatagtGGGTACATCctaaaatgacagtatcagactcactatta	UA197	UB7	UC3	1068711	1068391	1068391
U583	1	1070492	227	M3	0.988011988011988	SigA	1	acaaatattaatgtttagttaataaatagtTAATGTAGTTttttgtatctgTCTATTATTATAAATATATAcaaaataaatatttgaggataggtgttatt	UA145	UB55	UC1	1070492	1072786	1072786	NA, S457, S458, NA		SAOUHSC_01110, new_1070867_1072070_1, new_1072072_1072307_1, SAOUHSC_01113
U584	-1	1070575	1266	M3	0.503496503496504	SigA	0.744255744255744	gtttttagtttgtgcatgagattcaccggcaaacgttgataccgttaaactaataGCAGCtatgcttaaaattgatttcccaataaaattctttttcataa	UA198	UB3	UC3	1070575	1070533	1070533
U585	-1	1071689	1135	M3	0.981018981018981	SigA	0.999000999000999	tgcacttaattttaattaatgaagtgttAACTGGTAAAtgtatgaaaccGTTTGTAAAATAGCAGTGTActcgcattagtaagtacaaatttattttacag	UA199	UB9	UC4	1071689	1071604	1071604
U586	1	1072072	1129	M3	0.653346653346653	SigA	0.999000999000999	gtagagaagtaattaatatgtataattttacttataaagaaataagagatatattctaattatggttgaTATGTTATGATTAATATATaagttaaaaatta	UA28	UB9	UC4	1072072	1072786	1072786	S458, NA		new_1072072_1072307_1, SAOUHSC_01113
U587	1	1073029	224	M3	0.97002997002997	SigA	0.996003996003996	atattataaagtgtttatagttaattaataattagtTAATTTCAAAagttgtataaaTAGGATAACTTAATAAATGTaagataataatttggaggataatt	UA145	UB55	UC1	1073029	1074061	1074061	efb, S459, NA		SAOUHSC_01114, new_1073571_1073723_1, SAOUHSC_01115
U588	-1	1075979	341	M3	0.958041958041958	SigA	1	gatttctagaaatacaattaatgttcatctagaTATTGTACGaagttgtatgaaTAAGTTAAACTTAAGTTGAAtcaatttaaatgttcaaggaggttaac	UA15	UB1	UC1	1075979	1074341	1074341	NA, S462, NA, S461, NA, S460		SAOUHSC_01120, new_1075510_1075702_-1, SAOUHSC_A01081, new_1075082_1075290_-1, SAOUHSC_01119, new_1074294_1074895_-1
U589	-1	1076118	844	M4	0.935064935064935	SigA	0.999000999000999	tatataaaagttttgaaattgttcaaaactttttgaacacattaTGTGTTAATATATTTGCAGaattattttaaaatcgttttaaaactatactgaaataa	UA3	UB1	UC1	1076118	1075990	1074341	S463	NA, S462, NA, S461, NA, S460	new_1075981_1076118_-1	SAOUHSC_01120, new_1075510_1075702_-1, SAOUHSC_A01081, new_1075082_1075290_-1, SAOUHSC_01119, new_1074294_1074895_-1
U590	-1	1077719	1132	M3	0.915084915084915	SigA	1	tagttaatatatagttaatttttatttaatagttaatTAATTGATTTaattctaagatATTTGTATTTTTATATTGTAatcgattacatttttaaatcaaa	UA58	UB9	UC4	1077719	1076398	1076398	S464, hla		new_1077373_1077707_-1, SAOUHSC_01121
U591	1	1077916	990	M3	0.98001998001998	SigA	0.999000999000999	ttacatagaaatatctaatagataacgaaaaaGTATCGTATGtatttttaataTAGTGTAAAATATTATATGTaaaataaaatgtaggtttttagttagag	UA200	UB33	UC1	1077916	1078311	1078311	S465, NA, NA		new_1077920_1078044_1, SAOUHSC_01122, SAOUHSC_01123
U592	1	1085505	527	M4	0.602397602397602	SigA	1	ttgatacaatgctctatttaataatgatatttttaaaatttgtttttaatgtaatgttagatcTATGGTATATTATATTTATcgtggtaaatatgtatttg	UA3	UB1	UC1	1085505	1086063	1086063	S466, NA, S467		new_1085505_1085614_1, SAOUHSC_01131, new_1085843_1086103_1
U593	-1	1087140	45	M3	0.543456543456543	SigA	0.999000999000999	aatatacatactctaataacgtaatagtacacactcttcTTaTtaattggccatagctatCATGATATAATTAGTGAAGaaaatcacataagaaaggttgt	UA43	UB25	UC7	1087140	1086360	1086360	eta		SAOUHSC_01133
U594	-1	1088111	105	M3	0.949050949050949	SigA	1	ctataatagtgaaaaatataaacattttttatttacaagGTATTGCTAAtttaagttcatTTAGATATAATAATTCTTGTgttgttaaacgtgtcctggta	UA201	UB42	UC1	1088111	1087652	1087652	NA, S469		SAOUHSC_T0006, new_1087623_1087950_-1
U595	1	1088332	1307	M4	0.571428571428571	SigA	0.802197802197802	tttaaaatacagttaagtacattataagatgttgtgcggataaacaaactaattgcatcaaattTATTTTAAAATAACAACAAcaaaacgttaagcgaata	UA92	UB3	UC3	1088332	1091911	1091911	S470, psmB1, psmB2, NA, NA, S471, NA		new_1088341_1088442_1, SAOUHSC_01135, SAOUHSC_01136, SAOUHSC_01137, SAOUHSC_01139, new_1090559_1090749_1, SAOUHSC_01141
U596	-1	1088366	23	M1	0.963036963036963	NM	0.969030969030969	aatttaaatttgaagataacaaaaacgtgcgtagcttttaaatCACCGAaatgttattcGCTTAacgttttgttgttgttattttaaaataaatttgatgc	UA39	UB22	UC8	-1	-1	-1
U597	1	1088866	913	M3	0.837162837162837	SigA	0.986013986013986	catactttaatgttatgcactcagtttatttTATTTGCAGaaatttgagccTCTGTTAAGATTTAGATACAtagacaatataggagatggggaaattggga	UA11	UB1	UC1	1088866	1091911	1091911	NA, NA, S471, NA		SAOUHSC_01137, SAOUHSC_01139, new_1090559_1090749_1, SAOUHSC_01141
U598	-1	1090180	1457	M3	0.796203796203796	SigA	0.978021978021978	atggaaaatttataatattcattgttttacattttcaaaTCAATGAAAAacacaagtggttTAATGTATAATAATAGTAGTaaacaaataaggggtagata	UA27	UB7	UC3	1090180	1089709	1089709	NA		SAOUHSC_01138
U599	1	1090296	476	M3	0.998001998001998	SigA	0.998001998001998	tccatgattaaattgattttcaagccgtaAAATTGTCAAtcaccggtataGACTTTATACTATAGTTTGTaatcgcgtacttaaggagaaaaaacatggac	UA3	UB1	UC1	1090296	1091911	1091911	NA, S471, NA		SAOUHSC_01139, new_1090559_1090749_1, SAOUHSC_01141
U600	1	1092054	992	M4	0.65034965034965	SigA	0.994005994005994	ggcatttttttgttttttaaaataaatttcacaaattttgtataaatagtggtggatagtggggagaTGTGGTAAATTATATATAAggtgaggtgataaaa	UA202	UB50	UC1	1092054	1103403	1111087	mraZ, mraW, ftsL, pbpA, S472, mraY, murD, divIB, ftsA, ftsZ, S473, S474, NA	NA, sepF, NA, S475, NA, NA, S476, S477, ileS, S478, NA, S479	SAOUHSC_01142, SAOUHSC_01143, SAOUHSC_01144, SAOUHSC_01145, new_1096109_1096399_1, SAOUHSC_01146, SAOUHSC_01147, SAOUHSC_01148, SAOUHSC_01149, SAOUHSC_01150, new_1102834_1102959_1, new_1102961_1103159_1, SAOUHSC_01152	SAOUHSC_01153, SAOUHSC_01154, SAOUHSC_01155, new_1105380_1105461_1, SAOUHSC_01156, SAOUHSC_01158, new_1106910_1107050_1, new_1107052_1107129_1, SAOUHSC_01159, new_1109942_1110114_1, SAOUHSC_01160, new_1110971_1111392_1
U601	-1	1092089	18	M1	0.987012987012987	NM	0.999000999000999	tataatcatacgtccttttgtatctaattgatgatcgtattctCCCAtgaacattttttatCaCctcaccttatatataatttaccacatctccccactat	UA72	UB22	UC8	-1	-1	-1
U602	1	1100099	459	M3	0.977022977022977	SigA	1	taagaataattaaaaaattttgatattgtctatgtttaTAGTTCACAAgccattcaacgTATTGTAAACTAAGGATAGTgtatttttttaatagtaatttg	UA3	UB1	UC1	1100099	1103947	1111087	ftsA, ftsZ, S473, S474, NA, NA	sepF, NA, S475, NA, NA, S476, S477, ileS, S478, NA, S479	SAOUHSC_01149, SAOUHSC_01150, new_1102834_1102959_1, new_1102961_1103159_1, SAOUHSC_01152, SAOUHSC_01153	SAOUHSC_01154, SAOUHSC_01155, new_1105380_1105461_1, SAOUHSC_01156, SAOUHSC_01158, new_1106910_1107050_1, new_1107052_1107129_1, SAOUHSC_01159, new_1109942_1110114_1, SAOUHSC_01160, new_1110971_1111392_1
U603	1	1102961	977	M3	0.852147852147852	SigA	0.999000999000999	agtatcgtgtgaaaattaagtcaaaaattatttgcgcaaCATTTTAACTttaaacataaaTGTTATATTATATAATTATTaactttgtacagttagacgaa	UA67	UB33	UC1	1102961	1103947	1111053	S474, NA, NA	sepF, NA, S475, NA, NA, S476, S477, ileS, S478, NA, S479	new_1102961_1103159_1, SAOUHSC_01152, SAOUHSC_01153	SAOUHSC_01154, SAOUHSC_01155, new_1105380_1105461_1, SAOUHSC_01156, SAOUHSC_01158, new_1106910_1107050_1, new_1107052_1107129_1, SAOUHSC_01159, new_1109942_1110114_1, SAOUHSC_01160, new_1110971_1111392_1
U604	1	1103961	673	M4	0.735264735264735	SigA	0.991008991008991	aaaataatttttcaacaaaaccaaacgtgattgcagttacaaaaTATGTTACAATAGAGCGAGctaaagaagcgtatgaggctggaataagacattttggt	UA3	UB1	UC1	1103961	1111070	1111359	sepF, NA, S475, NA, NA, S476, S477, ileS, S478, NA, S479		SAOUHSC_01154, SAOUHSC_01155, new_1105380_1105461_1, SAOUHSC_01156, SAOUHSC_01158, new_1106910_1107050_1, new_1107052_1107129_1, SAOUHSC_01159, new_1109942_1110114_1, SAOUHSC_01160, new_1110971_1111392_1
U605	1	1105919	731	M3	0.862137862137862	SigA	1	atataattgtgaatgaacgaattcaatttGTTTTGACAAgtagattggaaTCATTTATTATGTTAGAATTacaacgtattaaaggcgcatcagttaaactt	UA3	UB1	UC1	1105919	1111359	1111359	NA, S476, S477, ileS, S478, NA, S479		SAOUHSC_01158, new_1106910_1107050_1, new_1107052_1107129_1, SAOUHSC_01159, new_1109942_1110114_1, SAOUHSC_01160, new_1110971_1111392_1
U606	1	1105982	965	M4	0.932067932067932	SigA	1	tagaattacaacgtattaaaggcgcatcagttaaactttaTACTATTCcagtaacagaTATGATACAATCTAATGAGaattggaaaaatgaaagtgcaaca	UA144	UB33	UC1	1105982	1111053	1111087	NA, S476, S477, ileS, S478, NA, S479		SAOUHSC_01158, new_1106910_1107050_1, new_1107052_1107129_1, SAOUHSC_01159, new_1109942_1110114_1, SAOUHSC_01160, new_1110971_1111392_1
U607	1	1110116	489	M3	0.962037962037962	SigA	0.991008991008991	gaatggtacaaattctctgaggcatataaatgcgttaTAGTTGCTATtctcaattatgTTCGCGATAATTTTAAGTAAaagtaagcacagatattgaattt	UA3	UB1	UC1	1110116	1111087	1111087	NA, S479		SAOUHSC_01160, new_1110971_1111392_1
U608	1	1111750	648	M3	0.827172827172827	SigA	1	gttagtaacattagatttaatgtaatatgctTACTTTTTTTattagcaggtgTAAGCTATAATATAAAGAGTtgtctcatggacgattgattggaggaacg	UA3	UB1	UC1	1111750	1124789	1124789	lspA, NA, S480, S481, pyrR, S482, pyrP, pyrB, pyrC, carA, carB, S483, pyrF, pyrE, NA, S484, NA, S485		SAOUHSC_01162, SAOUHSC_01163, new_1113203_1113380_1, new_1113382_1113561_1, SAOUHSC_01164, new_1114158_1114346_1, SAOUHSC_01165, SAOUHSC_01166, SAOUHSC_01168, SAOUHSC_01169, SAOUHSC_01170, new_1122124_1122232_1, SAOUHSC_01171, SAOUHSC_01172, SAOUHSC_01173, new_1123797_1124160_1, SAOUHSC_01174, new_1124617_1124840_1
U609	1	1113382	939	M3	0.989010989010989	SigA	0.992007992007992	tggttaatttttcaatatAGATTGACAAagcgcctgattAGTATTATCCTTATAACAGTttaagtacaacataaagagtctttaattgagcgtccagagag	UA103	UB38	UC1	1113382	1124789	1124789	S481, pyrR, S482, pyrP, pyrB, pyrC, carA, carB, S483, pyrF, pyrE, NA, S484, NA, S485		new_1113382_1113561_1, SAOUHSC_01164, new_1114158_1114346_1, SAOUHSC_01165, SAOUHSC_01166, SAOUHSC_01168, SAOUHSC_01169, SAOUHSC_01170, new_1122124_1122232_1, SAOUHSC_01171, SAOUHSC_01172, SAOUHSC_01173, new_1123797_1124160_1, SAOUHSC_01174, new_1124617_1124840_1
U610	1	1123531	971	M3	0.999000999000999	SigA	1	aatgaaggtaaaatttctagtgaagatatccaaacatTAGTTGAATGgagagacaactTAGCATAATATAGACACTAGaaggaggaattcaacaaatgaat	UA203	UB33	UC1	1123531	1123752	1123752	NA		SAOUHSC_01173
U611	-1	1123987	933	M3	0.995004995004995	SigA	0.998001998001998	catatgttaataaatgatacttatcataggtattaatGTTTTGACTTattgtcaaatTTGATTACAATTAAAATTAAgttaaaggagggacgttatgttac	UA204	UB29	UC1	1123987	1123896	1123896
U612	1	1124162	1201	M4	0.998001998001998	SigA	1	caggccaataagacgtttgtcattcgtgcacataacggtacgacgcgcttttgtcattttaatTATGTTAAGATAATAGTAGttatagaagttcaatctat	UA46	UB6	UC4	1124162	1124806	1124806	NA, S485		SAOUHSC_01174, new_1124617_1124840_1
U613	-1	1126625	675	M3	0.527472527472527	SigA	0.997002997002997	tttagataatgtaaaatgtatggcataatgtatggttcaataactatactgaaaagttacaaTCATGTTAAAATGAAACGAAtgatatgaagaaggtggaa	UA3	UB1	UC1	1126625	1124882	1124882	NA		SAOUHSC_01175
U614	1	1126796	744	M4	0.633366633366633	SigA	1	attgttagacttaatagaaattatggcatgcaatttcaaatatgctATACAATAtaaagaacaaTGTGATATCATATTTAAATaatagaagattagcttag	UA3	UB1	UC1	1126796	1127730	1127730	gmk, rpoZ		SAOUHSC_01176, SAOUHSC_01177
U615	1	1127802	273	M4	0.757242757242757	SigA	1	ggcatatccaaatcaaacgcacctatgtaggtgtgttttttTAGTTTAtccaatgattGATGTTATAATAATACTAAatttgtatctataaaaaagtaatg	UA10	UB1	UC1	1127802	1131572	1131572	S487, coaBC, priA		new_1127802_1127907_1, SAOUHSC_01178, SAOUHSC_01179
U616	1	1131938	959	M3	0.997002997002997	SigA	1	attagacaaaacaattttcttaaattatcaattaaaGTATTTAAAAatattgatggtTAATGTAAAATATCAATATAaataagttttttaaatttatgtat	UA132	UB33	UC1	1131938	1133000	1133000	NA		SAOUHSC_01180
U617	1	1133204	1484	M4	0.835164835164835	SigA	0.837162837162837	gtgacattaccttgttcatcagcaggtttgaaaacagtaatcactgcactaataATTGCTAAAATGTGTGGGAtacctgtccaacagaatattaagtgtag	UA165	UB61	UC14	1133204	1133323	1133323
U618	-1	1133403	1468	M2	0.937062937062937	SigB	0.937062937062937	aaggattgaataactgaaatttagatgattgggaatgcttaaacTAGAATGTttgaactaaaagtGGGTATAATaaaaagagaagctaatgtcattataag	UA27	UB7	UC3	1133403	1133042	1133042	NA, S488		SAOUHSC_01181, new_1132998_1133101_-1
U619	1	1133596	676	M4	0.555444555444555	SigA	1	gacaatcttcaaattgaaaaatatacattctatgatgtaaggTCGCATTTTtaatatattTACGTTATAATAGTTTGATGaattttattgaggagtaagag	UA3	UB1	UC1	1133596	1140191	1140191	def2, fmt, sun, NA, NA, pknB		SAOUHSC_01182, SAOUHSC_01183, SAOUHSC_01184, SAOUHSC_01185, SAOUHSC_01186, SAOUHSC_01187
U620	1	1140382	148	M3	0.53046953046953	SigA	1	tatcactctcacaatatttatatcatttgaaatgatcatTTATATATTAattttccagtcTTTGATATAATAAATGCAGTaaaattaatcgagaggtgcca	UA205	UB26	UC1	1140382	1142656	1142656	S489, rsgA, cfxE, thiN, S490		new_1140382_1140442_1, SAOUHSC_01188, SAOUHSC_01189, SAOUHSC_01190, new_1142594_1142700_1
U621	1	1143187	167	M1	0.835164835164835	NM	0.906093906093906	agctttacgacctgttacgaaacattgtttaCCcatatgagtacctcCtttaataaatataaatacacataactacttatatacttaattaagatagcata	UA206	UB65	UC1	-1	-1	-1
U622	-1	1143220	874	M3	0.705294705294705	SigA	1	ctcagtatttttgacttttatgtgaaaattatTCATTGTTTTtcaaatgaaacTATGCTATCTTAATTAAGTAtataagtagttatgtgtatttatattta	UA75	UB1	UC1	1143220	1142936	1142936	rpmB		SAOUHSC_01191
U623	1	1143286	687	M4	0.805194805194805	SigA	0.998001998001998	tagtttcatttgaaaaacaatgaataattttcacataaaagtcaaaaatactgagtttTGTGATATAATTGTAGACTgtgaagttatgtagtatgatattt	UA3	UB1	UC1	1143286	1145631	1145631	S492, NA, NA		new_1143285_1143604_1, SAOUHSC_01192, SAOUHSC_01193
U624	1	1145775	146	M4	0.923076923076923	SigA	0.999000999000999	cgggttaaaagtatcgttctcgagttgctaacaaTGTCATGTTcaacttagtCATGATAAAATAAATAACAtactaaatgatacgtaaaatcaaataaaac	UA205	UB26	UC1	1145775	1151717	1161917	recG, S493, fapR, plsX, fabD, fabG, S494, S495, acpP	S496, rnc, S497, smc, ftsY, NA, ffh, S498, rpsP, S499, rimM, trmD, S500, rplS	SAOUHSC_01194, new_1147891_1148060_1, SAOUHSC_01196, SAOUHSC_01197, SAOUHSC_01198, SAOUHSC_01199, new_1151303_1151463_1, new_1151465_1151544_1, SAOUHSC_01201	new_1151798_1151893_1, SAOUHSC_01203, new_1152626_1152771_1, SAOUHSC_01204, SAOUHSC_01205, SAOUHSC_01206, SAOUHSC_01207, new_1159344_1159684_1, SAOUHSC_01208, new_1160058_1160141_1, SAOUHSC_01209, SAOUHSC_01210, new_1161458_1161540_1, SAOUHSC_01211
U625	1	1148062	632	M4	0.741258741258741	SigA	0.993006993006993	aataatagctaaatattacagttatttgTTGAGTCggttaaatagaaAGTGTTATGATATGTGAGGaatgtttaagactaggtactaaaaaatgaggggtg	UA3	UB1	UC1	1148062	1159673	1161917	fapR, plsX, fabD, fabG, S494, S495, acpP, S496, rnc, S497, smc, ftsY, NA, ffh, S498	rpsP, S499, rimM, trmD, S500, rplS	SAOUHSC_01196, SAOUHSC_01197, SAOUHSC_01198, SAOUHSC_01199, new_1151303_1151463_1, new_1151465_1151544_1, SAOUHSC_01201, new_1151798_1151893_1, SAOUHSC_01203, new_1152626_1152771_1, SAOUHSC_01204, SAOUHSC_01205, SAOUHSC_01206, SAOUHSC_01207, new_1159344_1159684_1	SAOUHSC_01208, new_1160058_1160141_1, SAOUHSC_01209, SAOUHSC_01210, new_1161458_1161540_1, SAOUHSC_01211
U626	1	1151465	771	M3	0.953046953046953	SigA	0.963036963036963	taaggttccagaatttctccctaagaaacaCTAATCAATAaattgataagtGTTTCTAAAATTTCTACTTGttttttagaatttaaaatgggaaaatatag	UA3	UB1	UC1	1151465	1159673	1161917	S495, acpP, S496, rnc, S497, smc, ftsY, NA, ffh, S498	rpsP, S499, rimM, trmD, S500, rplS	new_1151465_1151544_1, SAOUHSC_01201, new_1151798_1151893_1, SAOUHSC_01203, new_1152626_1152771_1, SAOUHSC_01204, SAOUHSC_01205, SAOUHSC_01206, SAOUHSC_01207, new_1159344_1159684_1	SAOUHSC_01208, new_1160058_1160141_1, SAOUHSC_01209, SAOUHSC_01210, new_1161458_1161540_1, SAOUHSC_01211
U627	1	1159686	808	M3	0.999000999000999	SigA	1	aataattttcctggtaaagaaaaaaCTCTTTACAAacattcatacaCCTGTTAATATTATTTCTTGtagaaaataaaaattaaaacatgacttaaaggaga	UA3	UB1	UC1	1159686	1161917	1161951	rpsP, S499, rimM, trmD, S500, rplS	S501	SAOUHSC_01208, new_1160058_1160141_1, SAOUHSC_01209, SAOUHSC_01210, new_1161458_1161540_1, SAOUHSC_01211	new_1161892_1161963_1
U628	1	1161458	770	M3	0.925074925074925	SigA	1	aaatattagaaagatataaaataGGATTGAAAAaaggttagtatTGTGCTAACATAATCTGAGTgtggaaacactaaaatcactatgatccgctgctatat	UA3	UB1	UC1	1161458	1161968	1161968	S500, rplS, S501		new_1161458_1161540_1, SAOUHSC_01211, new_1161892_1161963_1
U629	-1	1161950	1516	M1	0.999000999000999	NM	1	tcaactttacattaactaaacagcaaaaaaagccatctatATCACTCCataaaagtgACCTAGatggctttattgtttgagtcgaatttgactcatacata	UA101	UB41	UC9	1161950	1161636	1161636
U630	-1	1164885	1202	M4	0.987012987012987	SigA	1	tattaagtgacattcatctttatcagtatgacatttttattATTCAATAtatttgtttAATGATAAACTGAAAATGAtccaaagtttaagtaactatgata	UA46	UB6	UC4	1164885	1162163	1162163	NA		SAOUHSC_01213
U631	1	1165062	694	M4	0.937062937062937	SigA	1	cttatacctaaatctaaagcattgttaagaagtgtgacAATGTTAAAATAAATATAGttgaattaatgaatttgttctataattaacaggttatagatttt	UA3	UB1	UC1	1165062	1168972	1168989	S502, rbgA, rnhB, sucC, sucD		new_1165062_1165141_1, SAOUHSC_01214, SAOUHSC_01215, SAOUHSC_01216, SAOUHSC_01218
U632	1	1166836	1272	M3	0.995004995004995	SigA	0.999000999000999	aaatcgtaaaattcaattaaatgataaaaaagtagcatttAAGTTTACAAtagcgcttacaTTTTTTATAATTGTAAGGGAacttaacctaagtaacagga	UA207	UB3	UC3	1166836	1168989	1168989	sucC, sucD		SAOUHSC_01216, SAOUHSC_01218
U633	1	1169176	93	M4	0.825174825174825	SigA	1	tacaatagctttataaaacaaagaaaattttaaTTAAAATAtatagcgcacTATGTTATAATGTTTGTATattattgtaaggagtgtttcatcatgaataa	UA208	UB36	UC1	-1	-1	-1
U634	1	1172568	1034	M2	0.994005994005994	SigB	0.994005994005994	tagagcaaaatagaaatgtttatgttttacctggatctATGTTTAAtcctatgacaaaaGGTAATTTAttacgtatccaagaaggtgctaaggtagtatta	UA154	UB10	UC5	1172568	1176333	1176333	S503, topA, S504, gid		new_1172645_1172778_1, SAOUHSC_01222, new_1174894_1175048_1, SAOUHSC_01223
U635	1	1172780	711	M3	0.93006993006993	SigA	0.949050949050949	atagacagggaaaatgatttgtttagatataaaACGTTGACAAaagcaaaattaaGCGTTTATCATTTATCTTTAgtaattagattagcgagggggaaatg	UA3	UB1	UC1	1172780	1189372	1198552	topA, S504, gid, S505, xerC, clpQ, hslU, codY, S506, NA, S507, S508, rpsB, NA, tsf, S509, pyrH, frr, S510, S511, uppS, cdsA, S512, NA, proS	S513, polC, S514, S515, rimP, nusA, NA, NA, infB	SAOUHSC_01222, new_1174894_1175048_1, SAOUHSC_01223, new_1176381_1176740_1, SAOUHSC_01224, SAOUHSC_01225, SAOUHSC_01226, SAOUHSC_01228, new_1180479_1180528_1, SAOUHSC_01230, new_1180622_1180684_1, new_1180686_1180856_1, SAOUHSC_01232, SAOUHSC_01233, SAOUHSC_01234, new_1182690_1182787_1, SAOUHSC_01235, SAOUHSC_01236, new_1184084_1184389_1, new_1184391_1184455_1, SAOUHSC_01237, SAOUHSC_01238, new_1…	new_1189377_1189524_1, SAOUHSC_01241, new_1193836_1194035_1, new_1194037_1194124_1, SAOUHSC_01242, SAOUHSC_01243, SAOUHSC_01244, SAOUHSC_01245, SAOUHSC_01246
U636	1	1176742	147	M4	0.848151848151848	SigA	1	ttaattctcaaaagatttagaattgattatcaaattaCTGTAAGCCctttgctgtaTATGCTACAATTCTTATTGatggagggtaaatgtattgaatcata	UA205	UB26	UC1	1176742	1180685	1198552	xerC, clpQ, hslU, codY, S506, NA, S507	S508, rpsB, NA, tsf, S509, pyrH, frr, S510, S511, uppS, cdsA, S512, NA, proS, S513, polC, S514, S515, rimP, nusA, NA, NA, infB	SAOUHSC_01224, SAOUHSC_01225, SAOUHSC_01226, SAOUHSC_01228, new_1180479_1180528_1, SAOUHSC_01230, new_1180622_1180684_1	new_1180686_1180856_1, SAOUHSC_01232, SAOUHSC_01233, SAOUHSC_01234, new_1182690_1182787_1, SAOUHSC_01235, SAOUHSC_01236, new_1184084_1184389_1, new_1184391_1184455_1, SAOUHSC_01237, SAOUHSC_01238, new_1186016_1186353_1, SAOUHSC_01239, SAOUHSC_01240, new_1189377_1189524_1, SAOUHSC_01241, new_1193836_1194035_1, new_1194037_1194124_1, SAOUHSC_01242, SAOUHSC_01243, SAOUHSC_01244, SAOUHSC_01245, SAOUH…
U637	1	1180686	766	M3	0.842157842157842	SigA	1	atagaattacctttaaatttatggaaaaatgcttgaaaaaCATTTGCTTTagacacggcatTATGTTATATTTATTTTCGGctataaagccaatacacaca	UA3	UB1	UC1	1180686	1198535	1198552	S508, rpsB, NA, tsf, S509, pyrH, frr, S510, S511, uppS, cdsA, S512, NA, proS, S513, polC, S514, S515, rimP, nusA, NA, NA, infB		new_1180686_1180856_1, SAOUHSC_01232, SAOUHSC_01233, SAOUHSC_01234, new_1182690_1182787_1, SAOUHSC_01235, SAOUHSC_01236, new_1184084_1184389_1, new_1184391_1184455_1, SAOUHSC_01237, SAOUHSC_01238, new_1186016_1186353_1, SAOUHSC_01239, SAOUHSC_01240, new_1189377_1189524_1, SAOUHSC_01241, new_1193836_1194035_1, new_1194037_1194124_1, SAOUHSC_01242, SAOUHSC_01243, SAOUHSC_01244, SAOUHSC_01245, SAOUH…
U638	1	1184391	300	M4	0.827172827172827	SigA	1	agtcagactttggtacagtttttttatttgcttATTCAATGCattaaatgagTATGATAAAATGATAATGAttgtttagtaacttatactatatgacagag	UA1	UB1	UC1	1184391	1189372	1198552	S511, uppS, cdsA, S512, NA, proS	S513, polC, S514, S515, rimP, nusA, NA, NA, infB	new_1184391_1184455_1, SAOUHSC_01237, SAOUHSC_01238, new_1186016_1186353_1, SAOUHSC_01239, SAOUHSC_01240	new_1189377_1189524_1, SAOUHSC_01241, new_1193836_1194035_1, new_1194037_1194124_1, SAOUHSC_01242, SAOUHSC_01243, SAOUHSC_01244, SAOUHSC_01245, SAOUHSC_01246
U639	1	1189338	969	M3	0.787212787212787	SigA	1	tataagagtaggaaaaagctgaaagaaatctgatgcTTATGTCCTGctcttattattTTTGATATAATGATTATTCGatgaaaaatgactgaagacatagt	UA203	UB33	UC1	1189338	1189372	1198552		S513, polC, S514, S515, rimP, nusA, NA, NA, infB		new_1189377_1189524_1, SAOUHSC_01241, new_1193836_1194035_1, new_1194037_1194124_1, SAOUHSC_01242, SAOUHSC_01243, SAOUHSC_01244, SAOUHSC_01245, SAOUHSC_01246
U640	1	1189377	282	M3	0.997002997002997	SigA	1	tgtcctgctcttattatttttgatataatgattatTCGATGAAAAatgactgaagaCATAGTATAATTAAAGATAAatttgttttaacaatataatgatta	UA99	UB1	UC1	1189377	1198552	1198552	S513, polC, S514, S515, rimP, nusA, NA, NA, infB		new_1189377_1189524_1, SAOUHSC_01241, new_1193836_1194035_1, new_1194037_1194124_1, SAOUHSC_01242, SAOUHSC_01243, SAOUHSC_01244, SAOUHSC_01245, SAOUHSC_01246
U641	1	1194037	144	M3	0.765234765234765	SigA	0.999000999000999	aacttttacaagaatctctgattaatagtgaagtCATTTGTTTCaagcataaactTATGCTATAATTAAGTTGCTtaaaaattagtgaactcaggcagaag	UA205	UB26	UC1	1194037	1198552	1198552	S515, rimP, nusA, NA, NA, infB		new_1194037_1194124_1, SAOUHSC_01242, SAOUHSC_01243, SAOUHSC_01244, SAOUHSC_01245, SAOUHSC_01246
U642	1	1198603	411	M3	0.754245754245754	SigA	0.786213786213786	aagctaaaagtatagttaagattgatatgctccctataaATattgcactttttaagtgtcTACTTTATAGGGAgcatatttgatactagcttttggttttt	UA20	UB1	UC1	1198603	1200116	1204162	S516, S517, rbfA, S518, truB	ribC, S519, rpsO, S520, pnpA	new_1198603_1198821_1, new_1198823_1198914_1, SAOUHSC_01247, new_1199318_1199433_1, SAOUHSC_01248	SAOUHSC_01249, new_1201338_1201451_1, SAOUHSC_01250, new_1201769_1202090_1, SAOUHSC_01251
U643	1	1198823	544	M3	0.977022977022977	SigA	1	tttctgttgaaatgcctatcttacggcaaacttTATTTGATTTtataggcttaaTTTATTAAAATAACGTGTGAgctaaaataattgtttaagcattgtta	UA3	UB1	UC1	1198823	1204162	1204179	S517, rbfA, S518, truB, ribC, S519, rpsO, S520, pnpA		new_1198823_1198914_1, SAOUHSC_01247, new_1199318_1199433_1, SAOUHSC_01248, SAOUHSC_01249, new_1201338_1201451_1, SAOUHSC_01250, new_1201769_1202090_1, SAOUHSC_01251
U644	1	1199318	1328	M2	0.997002997002997	SigB	0.997002997002997	atagataatttagtgttaggtatctggaaaATGTTTGAtaatttcttaatatCGGTATATTaacattaaacagttaatacatagatgtgtagaaatagtta	UA13	UB8	UC3	1199318	1204162	1204162	S518, truB, ribC, S519, rpsO, S520, pnpA		new_1199318_1199433_1, SAOUHSC_01248, SAOUHSC_01249, new_1201338_1201451_1, SAOUHSC_01250, new_1201769_1202090_1, SAOUHSC_01251
U645	1	1200133	149	M3	0.993006993006993	SigA	0.998001998001998	acattagaacaaataaaagaacttcatgagcaggatTCATTGCAAAataaattgttTCCTTTAGAATATGGATTAAagggtttgccaagcattaaaattaa	UA205	UB26	UC1	1200133	1204179	1204179	ribC, S519, rpsO, S520, pnpA		SAOUHSC_01249, new_1201338_1201451_1, SAOUHSC_01250, new_1201769_1202090_1, SAOUHSC_01251
U646	1	1204363	337	M3	1	SigA	1	gtgtgcaactgttaattatcctgtatgtatagtgattaaTAGTGTACATcaagtgtttttTAACTTATAATGAATAGTGAgtttatatatggacgggtaac	UA128	UB1	UC1	1204363	1214668	1214668	S521, rnjB, S522, ftsK, NA, NA, NA, NA, S523, NA, NA, pgsA		new_1204363_1204524_1, SAOUHSC_01252, new_1206097_1206477_1, SAOUHSC_01253, SAOUHSC_01254, SAOUHSC_01255, SAOUHSC_01256, SAOUHSC_01257, new_1212726_1212829_1, SAOUHSC_01258, SAOUHSC_01259, SAOUHSC_01260
U647	1	1207435	1340	M2	0.883116883116883	SigB	0.883116883116883	gaagtgcaacgtaaaggacaagtactagAGAATACattaaaagattttgGGGTAAATGcaaaagtgacacaaattaaaattggtcctgcagtaactcaata	UA148	UB8	UC3	1207435	1209177	1209177	NA		SAOUHSC_01254
U648	1	1214770	670	M3	0.933066933066933	SigA	1	tatggaatctagtttttttaatcccaaTTTTAGAAATtagccacgcaaTTGTTTATAATGATATATTGtaaaacaatatttgttcatttttttagggaaaa	UA3	UB1	UC1	1214770	1217269	1219156	S524, cinA, S525, S526, recA	S527, S528, NA	new_1214770_1214906_1, SAOUHSC_01261, new_1216059_1216164_1, new_1216166_1216297_1, SAOUHSC_01262	new_1217317_1217534_1, new_1217536_1217619_1, SAOUHSC_01263
U649	1	1216166	278	M3	0.997002997002997	SigA	1	tgatttcaagattttatacgaacaaatattcgcaaaaCACTTGTATTttattttgaatCCTTGTATAGTATTGGTAAGataattaaaagatagcaatttca	UA99	UB1	UC1	1216166	1217524	1219156	S526, recA, S527	S528, NA	new_1216166_1216297_1, SAOUHSC_01262, new_1217317_1217534_1	new_1217536_1217619_1, SAOUHSC_01263
U650	1	1217536	350	M3	0.993006993006993	SigA	0.998001998001998	tcaatatagtgcaaaagtgcaaattgatAACTTGACACttatctcctataAACCGTACAATTAATTTGTAtgatttatatataatttcataaagtcatatt	UA209	UB1	UC1	1217536	1219173	1219173	S528, NA		new_1217536_1217619_1, SAOUHSC_01263
U651	-1	1219736	1206	M3	0.679320679320679	SigA	0.997002997002997	tctttgaattatttttcttcaattatagagagacattACTTTGTCTgaaaacttcaaTATGTTAGTATTAAGACATCaaaataaataggagttgtaaataa	UA167	UB6	UC4	1219736	1219470	1219470	NA		SAOUHSC_01264
U652	1	1219826	752	M3	1	SigA	1	tctctataattgaagaaaaataattcaaagaatttaatattTACTTTAAATattagaacgtaTGAATTAAACTAGTATTTATgagaggatgaacaaaacat	UA3	UB1	UC1	1219826	1223406	1226415	NA, NA, NA	S529, NA, S530, miaB, NA, NA	SAOUHSC_01265, SAOUHSC_01266, SAOUHSC_01267	new_1223450_1223522_1, SAOUHSC_01268, new_1223817_1223897_1, SAOUHSC_01269, SAOUHSC_01270, SAOUHSC_01271
U653	1	1220758	1038	M4	0.756243756243756	SigA	0.865134865134865	gtccattagtatgaatttaatatagtaccactgtttacaTAGTAAATCggtggttcttTTTGTTATCATTTAATATGaaatatatccataggaggcatata	UA210	UB10	UC5	1220758	1226364	1226415	NA, NA, S529, NA, S530, miaB, NA, NA		SAOUHSC_01266, SAOUHSC_01267, new_1223450_1223522_1, SAOUHSC_01268, new_1223817_1223897_1, SAOUHSC_01269, SAOUHSC_01270, SAOUHSC_01271
U654	1	1223899	322	M3	0.947052947052947	SigA	0.999000999000999	atttgaattggcttgttagagatgacgtataactttaactgTTTTTGCACTttatagttaaaTTTAATATAATTATTAAATGatacgggcaaatagaaagg	UA1	UB1	UC1	1223899	1228438	1228438	miaB, NA, NA, S531, mutS		SAOUHSC_01269, SAOUHSC_01270, SAOUHSC_01271, new_1226392_1226776_1, SAOUHSC_01272
U655	1	1232228	1123	M3	0.991008991008991	SigA	0.997002997002997	aaattaaatttgacaaaatttttacaaaaaCCATTGACAAcgctttcatatcGATAGTATCATAACAAATATaataaaagttaatacatagaatagagacg	UA211	UB16	UC4	1232228	1234813	1236598	S533, glpF, S534, glpK	S535, glpD	new_1232229_1232333_1, SAOUHSC_01275, new_1233153_1233242_1, SAOUHSC_01276	new_1234812_1234934_1, SAOUHSC_01278
U656	1	1233244	631	M3	0.978021978021978	SigA	0.997002997002997	catgtttgattcatggattatgctattTTTTCGCCAAaatttaacagaTTTTGTACAATGGGTTAGCGattattttttaataaaggagatactactaatgg	UA3	UB1	UC1	1233244	1236598	1236598	glpK, S535, glpD		SAOUHSC_01276, new_1234812_1234934_1, SAOUHSC_01278
U657	1	1234812	87	M4	0.641358641358641	SigA	1	caacacaagtttttaaaacagaataaacttgtagatTAGACTTttgtataaacatTGTGATACAATCAATTTAAgttaatatttgaatcgagaagcgagag	UA212	UB45	UC1	1234812	1236598	1236598	S535, glpD		new_1234812_1234934_1, SAOUHSC_01278
U658	1	1236700	268	M3	1	SigA	1	ttttaagggcatcagtttttttatacgagatacattagtCAATTGAAACtatgcatcactAAATGTATGATAATAATAAAagcgaatataaaagcgttgtt	UA10	UB1	UC1	1236700	1238995	1238995	NA, miaA, hfq, S536		SAOUHSC_01279, SAOUHSC_01280, SAOUHSC_01281, new_1238874_1239036_1
U659	-1	1239600	154	M3	0.746253746253746	SigA	1	tcctactcaaagtattctatcatagagttttaGTAAAGACTAttacacgatttTGTGGTACATTTTAAGTAAAtcgaaaggatgatacaatggagacaatt	UA184	UB26	UC1	1239600	1239105	1239105	bsaA		SAOUHSC_01282
U660	1	1239640	471	M3	0.842157842157842	SigA	1	cctttcgatttacttaaaatgtaccacaaaatcgtgTAATAGTCTTtactaaaactcTATGATAGAATACTTTGAGTaggattttattaaggagatgtata	UA3	UB1	UC1	1239640	1242157	1242157	NA, NA		SAOUHSC_01283, SAOUHSC_01284
U661	1	1242374	349	M4	0.549450549450549	SigA	1	gttatatcaatgttttaagctttatgttagaaaacctgacatattTTTGAAATcctaaaaaaatTATGATAAGTTATTAACAAGttcaaaagtagaggaga	UA209	UB1	UC1	1242374	1244945	1244945	glnR, glnA, S537, NA, S538		SAOUHSC_01285, SAOUHSC_01287, new_1244199_1244640_1, SAOUHSC_01288, new_1244839_1244989_1
U662	-1	1242743	1485	M1	0.984015984015984	NM	0.99000999000999	aaatcctccaaattttatttaataaatcgggataaatcaCCACGATttattggcaaAGTTTCtccaataggcttttgcgtggcatctacaatcatcttttt	UA213	UB23	UC9	1242743	1242420	1242420
U663	-1	1248132	1152	M3	0.994005994005994	SigA	0.999000999000999	gaacataacaactcacTCCTTGTATAgtggtgaagcaAGTATTATTATTAAATTGTAggagggaaagtccctcctgactgattaacgctcgaatgtccatt	UA214	UB4	UC4	1248132	1248030	1248030
U664	1	1250096	497	M4	0.958041958041958	SigA	0.998001998001998	cgttactaataagggacaagtaaaatttatTACCAAGTCaaataggtttCATGGTAAAATAGTGAGTAaattttgtgctaaatattttacgcatattaata	UA3	UB1	UC1	1250096	1250181	1251643		NA, S542, S543, NA, NA, NA		SAOUHSC_01301, new_1250348_1250549_1, new_1250685_1250774_1, SAOUHSC_01303, SAOUHSC_01304, SAOUHSC_01305
U665	1	1250183	490	M3	0.996003996003996	SigA	1	tacgcatattaatatcattaatgatagccATATTGAAAAattattgaaaaAACTTTATAGTATAAATATGattaaatataaagtgagatgattttaattat	UA3	UB1	UC1	1250183	1251966	1251966	NA, S542, S543, NA, NA, NA, NA		SAOUHSC_01301, new_1250348_1250549_1, new_1250685_1250774_1, SAOUHSC_01303, SAOUHSC_01304, SAOUHSC_01305, SAOUHSC_01306
U666	-1	1253573	1220	M3	0.998001998001998	SigA	0.999000999000999	tgtgttccagcatgaaaagtcgctgtgataaaaaattaatTAATTTTCATaatgtattgttTGATGTATAATATATTTATTcaacttcgcgataatgcgat	UA215	UB66	UC4	1253573	1252586	1252586	NA		SAOUHSC_01307
U667	1	1253665	251	M3	0.985014985014985	SigA	0.997002997002997	atcacagcgacttttcatgctggaacacatgtattaaTGATTGAATTttactgttaaaAGTTCTATGATTTAGGAAATagagaaaagaggggatttaaatg	UA135	UB1	UC1	1253665	1255417	1255417	S544, cls1		new_1253666_1253930_1, SAOUHSC_01310
U668	1	1257151	313	M4	0.865134865134865	SigA	0.997002997002997	ttgcgtaaactaggtgtagatattgcttcaaatcatcatatcaatttaatatcaTTTGCTATAATACTCTTGTatgctttagggagtataatagcagtata	UA1	UB1	UC1	1257151	1258902	1258902	NA, NA		SAOUHSC_01313, SAOUHSC_01314
U669	-1	1257584	292	M3	0.943056943056943	SigA	0.995004995004995	acgacataataaaccatcattgcaacaaaaTAGTTGTTATacaataagtacGTTATTATTGTACATATAATcattgttagtatgaaaagattagttgccgt	UA1	UB1	UC1	-1	-1	-1
U670	-1	1259250	999	M4	0.844155844155844	SigA	1	gttaagaaatatcgtcaatagccatatctacatatttcaatattttggaaagctatagCATGATATAATGTTATTGTtaaggagtgaaaataaatgaacat	UA216	UB17	UC1	1259250	1259012	1259012	NA		SAOUHSC_01315
U671	1	1259311	638	M3	1	SigA	1	tgctatagctttccaaaatattgaaatatgtagatatggCTATTGACGAtatttcttaacTTTTATATGATTAATCGGAAtgaaaaaagagaagtaggtgg	UA3	UB1	UC1	1259311	1259854	1259854	nucI		SAOUHSC_01316
U672	1	1260857	961	M4	0.984015984015984	SigA	1	atctattttactattactatacctttgatttaaaactaatataccaattAATGCTACAATGATAATGAtaagtacaacataaaaagacattttttcaccaa	UA110	UB33	UC1	1260857	1261758	1261758	S545, S547, NA		new_1260857_1261161_1, new_1261163_1261216_1, SAOUHSC_01318
U673	-1	1261018	329	M3	0.998001998001998	SigA	1	cgacataaacttgaattcacgaatctttcacgtcatatTCATTGAACAtcaatatctgtCAGTTTATAATTTGATTATAacaatgatgaactaaaatcaac	UA1	UB1	UC1	1261018	1260049	1260049	S546, NA		new_1260887_1261018_-1, SAOUHSC_01317
U674	1	1261163	1162	M3	1	SigA	1	aatgacagaattaggtcactcatagtattttgaAGATTGAATTcattaattttaAAATGTATAATGATATTTGTgaaagcgcttgcttaggaggtgtattt	UA194	UB53	UC4	1261163	1261758	1261758	S547, NA		new_1261163_1261216_1, SAOUHSC_01318
U675	1	1263324	1103	M3	0.801198801198801	SigA	0.97002997002997	gtattcagttttgtaagtaagaatgatattatgtatttatattttgaatattacgAACTTTACAAaaataaagaatAATTCTATACTATACTATCAtctag	UA217	UB67	UC5	1263324	1267538	1267538	S549, hom, thrC, thrB, NA		new_1263324_1263418_1, SAOUHSC_01320, SAOUHSC_01321, SAOUHSC_01322, SAOUHSC_01323
U676	-1	1263353	1085	M3	0.989010989010989	SigA	1	gtacctccgtttgtgcttttgagaaaaacaaatgtaTTATTGAAAAacactagatgaTAGTATAGTATAGAATTATTctttatttttgtaaagttcgtaat	UA6	UB5	UC5	1263353	1261868	1261868	S548, NA		new_1263229_1263347_-1, SAOUHSC_01319
U677	1	1266692	443	M4	0.865134865134865	SigA	0.999000999000999	ttggtcgatattaatatcagtggtgttaaagaacgaattgtaTACCAATAgacgctttaTATTGTAAAATAGTATTAAatgcagaatagagaggagattta	UA93	UB1	UC1	1266692	1267538	1267538	NA		SAOUHSC_01323
U678	-1	1268193	996	M3	1	SigA	1	ttctgtttatattttattattaccatgttaccattctTTATTTTAGAtattttgcataTCGTGTATAATATAGATAACaataacttttcaggggtgaaatt	UA218	UB17	UC1	1268193	1267631	1267631	NA, NA		SAOUHSC_01325, SAOUHSC_01324
U679	-1	1269859	78	M3	0.949050949050949	SigA	0.952047952047952	ttttaattttttcgctttacagtactaaatagTTATTGAATAgtacacttaaaAAGCTTACAATAATGGGTATatttaaatagatgggagactaaatatgg	UA219	UB46	UC1	1269859	1268396	1268396	NA		SAOUHSC_01326
U680	1	1269978	1353	M3	0.995004995004995	SigA	0.997002997002997	aattttctgattttttaatcatcttgagcatgttTAATTGTAATtttgatggggtTAAATTATAATATGTATTAAattataattattataaattgtggagg	UA220	UB28	UC3	1269978	1274780	1274814	S550, katA, S551, rpmG, S552, rpsN, S553, guaC, S554, NA, S556		new_1269986_1270121_1, SAOUHSC_01327, new_1271544_1271633_1, SAOUHSC_01328, new_1271833_1272186_1, SAOUHSC_01329, new_1272507_1272595_1, SAOUHSC_01330, new_1273641_1273814_1, SAOUHSC_01332, new_1274679_1274830_1
U681	-1	1270963	1486	M1	0.985014985014985	NM	0.992007992007992	tgcagcattttgtctggagaaaaatctaatcctggaataatattagttggtgcaaacgcagcttgttcaacatccataaagtaattatctggatttctatt	UA40	UB23	UC9	1270963	1270827	1270827
U682	-1	1271813	1491	M1	1	NM	1	tcttcacaaaaatttcataaaaaagcgagctccccaatataataggtaagcCCGCTttattttcaaaTCGTCgtatttgaatgataagaattacttagttt	UA40	UB23	UC9	1271813	1271694	1271694
U683	1	1272188	170	M3	0.61038961038961	SigA	1	agaaaatgatttaacaaagaaatgaaactttaCTGTTGAATTatgtgaggatTGTGTTATTATATAAATCGTaataattacgatttgataaaaagtgaggt	UA89	UB14	UC1	1272188	1274780	1274814	rpsN, S553, guaC, S554, NA, S556		SAOUHSC_01329, new_1272507_1272595_1, SAOUHSC_01330, new_1273641_1273814_1, SAOUHSC_01332, new_1274679_1274830_1
U684	1	1273595	119	M3	0.994005994005994	SigA	1	tttacaaagctcaatttcatatgccggtggaaaaGACTTGAAATcattacgtactgTAGATTATGTTATTGTTAGAaactctattttcaacggtgatagag	UA221	UB63	UC1	1273595	1274814	1274814	S554, NA, S556		new_1273641_1273814_1, SAOUHSC_01332, new_1274679_1274830_1
U685	-1	1275724	1012	M3	0.545454545454545	SigA	0.999000999000999	atcagaacttatgttctgtgtcaatattttaacgaacaaaTGTTTGTTTTggtttcaaattAATGATATACTGTATTTAAAttaatttagggagtgcctat	UA222	UB37	UC5	1275724	1273173	1273173	lexA, S555, NA		SAOUHSC_01333, new_1273742_1274984_-1, SAOUHSC_01331
U686	1	1275776	1015	M3	0.956043956043956	SigA	0.999000999000999	atatcattaatttgaaaccaaaacaaacatttgttcgttaaaATATTGACACagaacataagtTCTGATAAATTACTAATACAaacaaatgttctaggagt	UA223	UB37	UC5	1275776	1276140	1279064	NA, S557	NA, S558, tkt, S559, NA	SAOUHSC_01334, new_1276058_1276140_1	SAOUHSC_01336, new_1276507_1276663_1, SAOUHSC_01337, new_1278581_1278722_1, SAOUHSC_01338
U687	1	1276142	737	M4	0.548451548451548	SigA	0.995004995004995	ctatttttgcgaaatagcgttttttattacttttttgctgaTCTTAAAtttgttatatTTTGTTAAAGTATTATAATgattgaataaacaaattgaaggta	UA3	UB1	UC1	1276142	1279030	1279064	NA, S558, tkt, S559, NA		SAOUHSC_01336, new_1276507_1276663_1, SAOUHSC_01337, new_1278581_1278722_1, SAOUHSC_01338
U688	1	1276507	439	M4	0.642357642357642	SigA	1	aagaattttctgacattataacttgaaataagtattttacTTATCTTTttattttaaaaTAAGTTATAATGTATTTGAtaaaattgaagaagggaagatac	UA93	UB1	UC1	1276507	1279064	1279064	S558, tkt, S559, NA		new_1276507_1276663_1, SAOUHSC_01337, new_1278581_1278722_1, SAOUHSC_01338
U689	1	1278724	945	M3	0.843156843156843	SigA	0.99000999000999	tactatttcagattaatctttaaaagCTCTGTTATAacagcatgattTTTGATATTATTTTTAGTATcgatattaaaatacttgaataaactagttcttga	UA103	UB38	UC1	1278724	1279064	1279064	NA		SAOUHSC_01338
U690	1	1279186	836	M3	0.534465534465534	SigA	0.996003996003996	aagaataaatatgtttattaaaattaaagttaacaaaaTGACGAatagactgagaAATGCTATAATTCATTTTGTatgatttacagagagtttatttaacg	UA3	UB1	UC1	1279186	1283977	1283977	S560, NA, sbcD, sbcC, NA		new_1279186_1279278_1, SAOUHSC_01340, SAOUHSC_01341, SAOUHSC_01342, SAOUHSC_01343
U691	-1	1284464	588	M3	1	SigA	1	aacaaaggtctttgcgataatcaaattttcttgaataatCTATTTTCTAatttttttattTGTTGTATAATTGAGGTTACatttaaaaaagagaggttgag	UA3	UB1	UC1	1284464	1284053	1284053	S561		new_1284024_1284461_-1
U692	1	1284521	824	M3	0.728271728271728	SigA	0.997002997002997	aacaaataaaaaaattagaaaatagattattcaagaaAATTTGATTAtcgcaaagaccTTTGTTATCCTATAAAGGTGcgtgagttattgaataaaatgtt	UA3	UB1	UC1	1284521	1286357	1286357	S562, opuD		new_1284521_1284622_1, SAOUHSC_01346
U693	1	1287103	1354	M3	0.98001998001998	SigA	1	aaaagtcaaaacctaaattaagcgttttctaagcatgatGAGTTGTTTAtcaataaatatAATAATACAATTTAATCAAGgcatataaatataaaaatgta	UA220	UB28	UC3	1287103	1291627	1291627	citB, S563, NA, S564		SAOUHSC_01347, new_1289903_1290045_1, SAOUHSC_01348, new_1290514_1290649_1
U694	-1	1291309	458	M3	0.995004995004995	SigA	0.996003996003996	cattgcatatttttttgcagttgatggattattttaTTTTTGCAAAaacaattttttTAACTTAAAATTCAACTATActtagtttttttacaagaacattt	UA93	UB1	UC1	1291309	1290734	1290734	S565, NA		new_1291017_1291309_-1, SAOUHSC_01349
U695	-1	1292042	833	M4	0.821178821178821	SigA	1	tagcttaattccatatattaatccccgtttttaaaatttttAGCCGTAAtttaaatgaaTATGATAAAATAGTCCTAAgatattaaaggatgtgtaatatt	UA3	UB1	UC1	1292042	1290768	1290734	plsY, S566, S565, NA		SAOUHSC_01350, new_1291311_1291391_-1, new_1291017_1291309_-1, SAOUHSC_01349
U696	1	1292140	713	M4	0.526473526473527	SigA	0.959040959040959	gattaatatatggaattaagctatgaaagttaattgatacTTGCATTttacgctgattTATATAAGAATAACTATTGTatagttttaaaaacgaacgtacg	UA3	UB1	UC1	1292140	1298325	1298325	S567, parE, parC, S568, alsT		new_1292140_1292205_1, SAOUHSC_01351, SAOUHSC_01352, new_1296625_1296848_1, SAOUHSC_01354
U697	1	1296625	948	M4	0.714285714285714	SigA	0.997002997002997	attttggtgaagtaatagacatgtatattagctaaaaactaTATGCAATcacgaaattaAATGATAAAATACAGTAATgttaaattttgactaaattcaag	UA103	UB38	UC1	1296625	1298325	1298325	S568, alsT		new_1296625_1296848_1, SAOUHSC_01354
U698	1	1298606	1189	M3	0.973026973026973	SigA	0.998001998001998	gttttagctttgcacaatttaatagtacgttttAGTTTGTATTgagtattaatTCAGATAATATATAAATAAAtagaattatttgtaaatatgggagtcag	UA224	UB6	UC4	1298606	1300994	1300994	S569, glcT, NA, NA		new_1298606_1298808_1, SAOUHSC_01356, SAOUHSC_01357, SAOUHSC_01358
U699	1	1301294	517	M3	0.94005994005994	SigA	0.981018981018981	tcataatcggctgttaattaataatatttttcataaGTATTgattcatcattttctTTATGTTAAATATGAAtcagtatagataaccatattgttctgttt	UA3	UB1	UC1	1301294	1301436	1303986	S570	fmtC	new_1301294_1301437_1	SAOUHSC_01359
U700	1	1301439	518	M4	0.6003996003996	SigA	0.997002997002997	atgacaaaagtgttatataaatcaaaggtaaatgatATGCTATTTttatggtttaTATGATATATTTTGATTTAtaacagaaataattagaattgatgtga	UA3	UB1	UC1	1301439	1303986	1303986	fmtC		SAOUHSC_01359
U701	1	1304786	654	M3	0.891108891108891	SigA	0.994005994005994	atcctttcattagaccttagtacgatttattaagaaatCACTTGCTTTttgaattgtttTTATATAACGTTAATATGTGattattatagtacacaaaaatc	UA3	UB1	UC1	1304786	1305839	1305839	S573, msrR		new_1304785_1304854_1, SAOUHSC_01361
U702	-1	1304816	258	M3	0.957042957042957	SigA	0.999000999000999	tgtcattagtttctttatccatatttacctaccttatATCTTCAAAAatagatttttgTGTACTATAATAATCACATAttaacgttatataaaaacaattc	UA135	UB1	UC1	1304816	1304147	1304147	S572, msrA2, S571		new_1304719_1304810_-1, SAOUHSC_01360, new_1304105_1304208_-1
U703	1	1305890	1513	M1	0.996003996003996	NM	1	gaagattaaaaataaacaaggcgatttctatcataCTCagatagaagtcgcCTtgttcgttttcaaagaattaattggcatgcatcttatgaagaattatt	UA101	UB41	UC9	1305890	1306026	1306026
U704	-1	1306154	997	M3	0.658341658341658	SigA	0.998001998001998	ttctatttcaactattttagaacaaatgttctgttattttgCAAATGAATTtttaagtattaCATGATATACTCAAATTAATaatgattaggaggtttgga	UA225	UB17	UC1	1306154	1305898	1305898	dmpI		SAOUHSC_01362
U705	1	1306226	1370	M3	0.983016983016983	SigA	0.997002997002997	ttcatttgcaaaataacagaacatttgttctaaaaTAGTTGAAATagaacacgtgtTCGTATATAATAAGATTCAAgtaagggaggaataacagtgtataa	UA226	UB7	UC3	1306226	1310123	1310123	NA, S575, NA, S576		SAOUHSC_01363, new_1307522_1308880_1, SAOUHSC_01365, new_1309987_1310160_1
U706	-1	1308600	444	M4	0.977022977022977	SigA	0.997002997002997	tgcatacgatgcagatatttctcagttagataaagctaaatcaatCGGCATTATtaatgaaaAATGTTTAAATTATAGTGAagctattaaaaaagccgatg	UA93	UB1	UC1	1308600	1307683	1307683
U707	1	1308882	1341	M3	0.805194805194805	SigA	0.806193806193806	ataaaaatcgataatagcatTAATAGATAAacggagataaaTCATCTACAATAAAGAGTATagtaacacaatggcaacggaggggtaaatcaatggaacca	UA148	UB8	UC3	1308882	1310361	1310378	NA, S576, S577		SAOUHSC_01365, new_1309987_1310160_1, new_1310162_1310400_1
U708	1	1309987	936	M3	0.985014985014985	SigA	0.995004995004995	cttatcaccaattgagtaaacaattaGTGTTGACAAatgtgaacgacCTATGTAATATAATGAACTAtaaaaataattagaattttctaaagaaatagtag	UA168	UB29	UC1	1309987	1310378	1310378	S576, S577		new_1309987_1310160_1, new_1310162_1310400_1
U709	1	1316838	1218	M3	0.972027972027972	SigA	0.974025974025974	ggcgaatactgtttgaaaaagtgaaaaacggtgaattataAAATTGAATAcaatttcaaaAAAAGTAATATGAGCAAACCcaaacgttcatattacttttt	UA227	UB66	UC4	1316838	1316957	1319575	S578	S579, femA, femB	new_1316872_1316967_1	new_1316969_1317075_1, SAOUHSC_01373, SAOUHSC_01374
U710	1	1316872	1384	M1	0.918081918081918	NM	0.94005994005994	attataaaattgaatacaatttcaaaaaaagtaatatgagcaaACCCAaacgttcatattACTTTttttgaaattgtattcaaaaatctaaatattactat	UA12	UB7	UC3	1316872	1319609	1319609	S578, S579, femA, femB		new_1316872_1316967_1, new_1316969_1317075_1, SAOUHSC_01373, SAOUHSC_01374
U711	1	1316969	468	M3	0.988011988011988	SigA	1	ctataaaagtatacgcaattaaagcgtttaTGTTTTAGTTttaacattaacTATTGTATACTTATTTAGATtagatttattatttttgacatttgcagagg	UA3	UB1	UC1	1316969	1319609	1319609	S579, femA, femB		new_1316969_1317075_1, SAOUHSC_01373, SAOUHSC_01374
U712	1	1320271	723	M4	0.917082917082917	SigA	1	aggtaccctacatcataatcattatctaataTCGTCACataacttactTATGCTATAATCATGGTATtatattgtttggagtgatttgatgagatttgtct	UA3	UB1	UC1	1320271	1321037	1321037	NA		SAOUHSC_01375
U713	-1	1321668	1154	M3	0.897102897102897	SigA	0.997002997002997	caagcattttcatattagttatttaAGAATGCGATaattctagactTGTTATAAAATATAGATAAAtcaagtattttaatctagacacttatctattttat	UA228	UB21	UC4	1321668	1321130	1321130	S580, NA		new_1321588_1321668_-1, SAOUHSC_01376
U714	-1	1322966	1378	M2	0.997002997002997	SigB	0.997002997002997	tgaatatttaccatttgatttaagctgcacgtATGATTCGtaccaatttgatgGGGAAAATGttagtagattgagtcaatattatggtcatacaattggct	UA12	UB7	UC3	1322966	1321674	1321130	opp-2F	S580, NA	SAOUHSC_01377	new_1321588_1321668_-1, SAOUHSC_01376
U715	-1	1325671	1191	M3	0.871128871128871	SigA	1	tctattagtagatagaatattgcttgaaactgactgctaTTGTTTAAGTttttaaaaattTATAATAAAATGTATACAAGgaaagtaatgaaataaaagga	UA229	UB6	UC4	1325671	1325295	1325295	NA		SAOUHSC_01382
U716	1	1325787	564	M3	0.828171828171828	SigA	0.983016983016983	atagaaaaatcattgttccttgcgacatggaaatcgtaacaTTATCGTTTAggagacaaaaTTATGTATAATGAATGTATTataccaaaggagtgattata	UA3	UB1	UC1	1325787	1327650	1327650	NA		SAOUHSC_01383
U717	-1	1325804	614	M3	0.756243756243756	SigA	0.995004995004995	acaggaacatcttctcttaaaggtaaacCTTGAGACATataatcactccTTTGGTATAATACATTCATTatacataattttgtctcctaaacgataatgtt	UA3	UB1	UC1	1325804	1325295	1325295	S581, NA		new_1325673_1325805_-1, SAOUHSC_01382
U718	-1	1332403	2	M4	0.723276723276723	SigA	0.919080919080919	taacaattttttatgtaacatttacagtttctaaaaatgaggttaataattcAAGGTTAAGATAAAGATGTaatcaatacaaatactatttgttgttcata	UA230	UB68	UC15	1332403	1327743	1327743	pstS, NA, PstC, pstA, pstB, phoU		SAOUHSC_01389, SAOUHSC_01388, SAOUHSC_01387, SAOUHSC_01386, SAOUHSC_01385, SAOUHSC_01384
U719	-1	1334267	374	M4	0.655344655344655	SigA	1	aattatatcatattatcgtcacagtttcgacctcatataagttgtaatgatagaatgactcacaCATGTTATAATAATAAAGAatacaagaatcgaaggag	UA57	UB1	UC1	1334267	1333353	1333353	cvfB		SAOUHSC_01391
U720	1	1334314	649	M4	0.937062937062937	SigA	1	ttataacatgtgtgagtcattctatcattacaacttatatgaggTCGAAACTGtgacgataaTATGATATAATTCTTCCGTtagaatatcgaatgaaaaaa	UA3	UB1	UC1	1334314	1336235	1336235	NA, S583		SAOUHSC_01392, new_1335969_1336266_1
U721	1	1336546	1095	M3	1	SigA	1	aattttcaggttattccaaaaaatctaaattatCGGTTTACATtcatatttgtcATATGTATAATGAACACATAccaatttaataatattttgatgaggcg	UA7	UB5	UC5	1336546	1345075	1345075	S584, lysC, asd, dapA, dapB, dapD, S585, NA, alr2, lysA		new_1336546_1336770_1, SAOUHSC_01394, SAOUHSC_01395, SAOUHSC_01396, SAOUHSC_01397, SAOUHSC_01398, new_1341482_1341582_1, SAOUHSC_01399, SAOUHSC_01400, SAOUHSC_01401
U722	-1	1336566	29	M1	0.763236763236763	NM	0.772227772227772	tgttagcagacagtaatctaaactttactcatgattgatgcGCCTcatcaaaatatTATTAAattggtatgtgttcattatacatatgacaaatatgaatg	UA231	UB22	UC8	-1	-1	-1
U723	1	1343698	495	M3	0.99000999000999	SigA	1	attaatgatgagccatatgtttgttgaagtagatggcaatgTACATGCACAagatgaagttaTTCTTTATAATAATGATATCcgcatcgatgaatatacct	UA3	UB1	UC1	1343698	1345075	1345075	lysA		SAOUHSC_01401
U724	-1	1346239	955	M3	0.986013986013986	SigA	1	ataattgattaaatgaatattttttattattGTATTGCAATttggtaataacTGCACTATAATACAAGTTAAgcagatgattattccatattgcaaagaat	UA232	UB38	UC1	1346239	1345848	1345848	S588, cspA, S587		new_1346118_1346239_-1, SAOUHSC_01403, new_1345816_1345916_-1
U725	-1	1346646	810	M3	0.978021978021978	SigA	0.984015984015984	attactatagttactactttgtttgtttcaagtcgtcaAACTTGATTTtcagaggataaAGGTATAAAAATAAGTATAGagtttttgaagtatggaagggg	UA3	UB1	UC1	1346646	1345168	1345168	NA, S588, cspA, S587, msa, S586		SAOUHSC_01405, new_1346118_1346239_-1, SAOUHSC_01403, new_1345816_1345916_-1, SAOUHSC_01402, new_1345115_1345318_-1
U726	1	1346724	1184	M3	0.997002997002997	SigA	0.998001998001998	aagtttgacgacttgaaacaaacaaagtagtaactatagtaatTATTAGTTTTtttaagtaaaaCTACGTATAATAACATTATGaggtggtaaaaatgaga	UA233	UB6	UC4	1346724	1348900	1348900	acyP, NA, NA, S589		SAOUHSC_01406, SAOUHSC_01407, SAOUHSC_01408, new_1348845_1348947_1
U727	-1	1351237	663	M4	0.785214785214785	SigA	1	tgctatgtacaacatatttcataTAGACTCTTtattatttttTGTGCTAAAATATTTACTTgtaaattatttcgtgttttaaaaaaaggagtaactctatg	UA3	UB1	UC1	1351237	1349860	1349860	braB		SAOUHSC_01411
U728	-1	1355385	1338	M3	0.915084915084915	SigA	1	atttttcacatattaatctataatcaaaatcaactgaccgataTTCTATAATTtatgattaaaaTAAGTTATAATATAATAGTAaagataaagatagaggt	UA148	UB8	UC3	1355385	1349877	1349860	NA, NA, S591, NA, NA, S590, braB		SAOUHSC_01415, SAOUHSC_01414, new_1354169_1354295_-1, SAOUHSC_01413, SAOUHSC_01412, new_1351239_1351423_-1, SAOUHSC_01411
U729	-1	1360051	1300	M3	0.943056943056943	SigA	0.999000999000999	gcttttgttgattcttctttttagcagataaataggtaaatcTACTTTAACAaataactaaatAGTGATATTATTACATTGTAagcgtttcaacatttttg	UA36	UB3	UC3	1360051	1355385	1353345	sucA, sucB, S593, S592	NA, NA, S591, NA	SAOUHSC_01418, SAOUHSC_01416, new_1355835_1355916_-1, new_1355387_1355833_-1	SAOUHSC_01415, SAOUHSC_01414, new_1354169_1354295_-1, SAOUHSC_01413
U730	-1	1362613	1018	M2	0.997002997002997	SigB	0.997002997002997	agttcaaaatcgcacattgaaatgatgtgtgaaATGTTTAAactacggtcattttGTGAAAATAaagataataactattcattttacaatagtgaaaagtc	UA125	UB10	UC5	1362613	1360145	1360145	S595, arlR, arlS, S594		new_1362293_1362553_-1, SAOUHSC_01420, SAOUHSC_01419, new_1360103_1360280_-1
U731	1	1362874	169	M3	0.999000999000999	SigA	1	ttatttactattcttaaaaaatattcaaaaaaagttttagtttcTAATTGACAAtgattctcacTAATGTATAATAGTAGTTGAaaatgattatcaatacc	UA234	UB69	UC1	1362874	1363707	1363707	S596, S597		new_1362874_1363048_1, new_1363050_1363769_1
U732	-1	1365585	684	M3	0.998001998001998	SigA	0.998001998001998	tttgcaaagatagcaatttaggaggcgtgtttatttTTATTGACGTctaactctaaaAGATATAAATTAGACATTTAcaaatgatgtaaataacgcaattt	UA3	UB1	UC1	1365585	1363035	1363035	S598, NA, murG, NA		new_1365302_1365585_-1, SAOUHSC_01425, SAOUHSC_01424, SAOUHSC_01423
U733	-1	1367234	230	M3	0.913086913086913	SigA	0.99000999000999	attaatcaattatagtgaaatatggtgcgctATCTTGCATAaattgatatgaTTAACTACACAGAATTTAAAagtacataatacataataaggaagtgata	UA159	UB55	UC1	1367234	1365704	1365704	ctpA		SAOUHSC_01427
U734	-1	1367319	460	M3	0.774225774225774	SigA	0.955044955044955	aatttttaataataatagttagaaccagggtgatgcaattcgttatcctggtttTAATTTAAAATAAACTAAGTtgtgactaaaaattaatcaattatagt	UA3	UB1	UC1	1367319	1365704	1365704	S599, ctpA		new_1367236_1367319_-1, SAOUHSC_01427
U735	1	1367728	1507	M4	0.492507492507492	SigA	0.861138861138861	ttaattgaagctgcttgatcagtgttagtaattataattGGTGAaattacagatttAGCGTTATTATTAATATATtcaaggttgaatcttactaatggatc	UA235	UB41	UC9	1367728	1368127	1368127
U736	-1	1369105	346	M3	0.991008991008991	SigA	1	taagaagtaaatttaatcttttcagtgttaattacttCCATTTCAATcctttatagactAAATTTATAATTAGATAGATagaggaggtaattcatatgaca	UA236	UB1	UC1	1369105	1367387	1367387	msrA2, msrB, crr, NA		SAOUHSC_01432, SAOUHSC_01431, SAOUHSC_01430, SAOUHSC_01429
U737	-1	1371696	1043	M4	0.416583416583417	SigA	0.57042957042957	gatattaatatcatattcctaaaatgagtgataacaaaatgctacataaagttaagtTATATCAAActaaatatacatactataaataatgaaaatgaggt	UA137	UB10	UC5	1371696	1367404	1367387	thyA, S600, dfrA, NA, msrA2, msrB, crr, NA		SAOUHSC_01435, new_1370490_1370688_-1, SAOUHSC_01434, SAOUHSC_01433, SAOUHSC_01432, SAOUHSC_01431, SAOUHSC_01430, SAOUHSC_01429
U738	-1	1374218	325	M4	0.807192807192807	SigA	1	ataaatacattttacgtatagaattataaaaggtttcatTCAAATCTtagggtcaaaAATGTTATAATATTTTTATgtcaaatttaaaacagtaacactta	UA1	UB1	UC1	1374218	1367404	1367387	NA, NA, cvfC, NA, S601, thyA, S600, dfrA, NA, msrA2, msrB, crr, NA		SAOUHSC_01439, SAOUHSC_01438, SAOUHSC_01437, SAOUHSC_01436, new_1371698_1372034_-1, SAOUHSC_01435, new_1370490_1370688_-1, SAOUHSC_01434, SAOUHSC_01433, SAOUHSC_01432, SAOUHSC_01431, SAOUHSC_01430, SAOUHSC_01429
U739	-1	1374259	470	M3	0.998001998001998	SigA	0.999000999000999	attttactgaaaaatcgtttgcgatgcaatagCATTTGAATAtaaatacattttACGTATAGAATTATAAAAGGtttcattcaaatcttagggtcaaaaat	UA3	UB1	UC1	1374259	1374221	1367387		NA, NA, cvfC, NA, S601, thyA, S600, dfrA, NA, msrA2, msrB, crr, NA		SAOUHSC_01439, SAOUHSC_01438, SAOUHSC_01437, SAOUHSC_01436, new_1371698_1372034_-1, SAOUHSC_01435, new_1370490_1370688_-1, SAOUHSC_01434, SAOUHSC_01433, SAOUHSC_01432, SAOUHSC_01431, SAOUHSC_01430, SAOUHSC_01429
U740	1	1374321	792	M3	0.999000999000999	SigA	1	tacgtaaaatgtatttatattcaaatgCTATTGCATCgcaaacgatttTTCAGTAAAATGAGTTAGTTatttattgagcggtttctaaacacccgcatgat	UA3	UB1	UC1	1374321	1375488	1375488	S602, NA, S603		new_1374321_1374385_1, SAOUHSC_01440, new_1375091_1375533_1
U741	1	1375587	545	M3	0.832167832167832	SigA	0.996003996003996	gttacttatttaagtgatgcgtgtttttTAATGGATTAcccaacatatttTGTATTACAGTAATAGTAACtttaactaagtattgaatagaaagtaggttt	UA3	UB1	UC1	1375587	1375998	1375998	NA		SAOUHSC_01443
U742	-1	1402101	128	M3	0.598401598401598	SigA	0.985014985014985	agatcaaataccatctggttatacgatacttgcgACTGGTACAcctgatggggtgCATAATACAATTACTATACGaccgcaagattatgttgtattcatac	UA196	UB26	UC1	1402101	1401540	1401540
U743	-1	1410297	49	M3	0.977022977022977	SigA	1	caaattatagataaaatatgaataattaattaatgGTATTTACATattcataaccaAAGGATAAAATAATTGTGAAattattcacaaatgaaagaggagtg	UA43	UB25	UC7	1410297	1405059	1405059	ald1, S606, ilvA1, NA, S605, norB		SAOUHSC_01452, new_1409038_1409131_-1, SAOUHSC_01451, SAOUHSC_01450, new_1406488_1406643_-1, SAOUHSC_01448
U744	-1	1415189	691	M4	0.978021978021978	SigA	0.998001998001998	acttttaagttggaatgtttgaagaaaattgattattcgtatgttttatcaagcagcTATGATAAAATTTAAACATaatacaatgcgagccatttaacgat	UA3	UB1	UC1	1415189	1410703	1410703	S607, NA, NA		new_1415064_1415191_-1, SAOUHSC_01455, SAOUHSC_01454
U745	1	1415349	382	M3	0.642357642357642	SigA	0.681318681318681	tagaaaataaatattgtcacagtttgttcacacacatcacagaattgaCACCGTATAATAGCCAATTGggagggaaatatgaaaaatacatttaatccatt	UA20	UB1	UC1	1415349	1416832	1416832	NA, S608		SAOUHSC_01456, new_1416708_1416795_1
U746	1	1417461	1472	M4	0.75024975024975	SigA	1	aaataacttacgtcgctttgttgctttacgatctactaaatATTCAAattctttattaCTTGTTAAAATGTATGTAGataaaaatggatgttgtttcatta	UA96	UB7	UC3	-1	-1	-1
U747	1	1419059	1487	M1	0.994005994005994	NM	0.995004995004995	acaatcatctcagactgtgtgagcatggactttcctctatataatatagcgattacccaaaatatcacttttaaaattataacatagtcattattagtaag	UA40	UB23	UC9	1419059	1419161	1419161
U748	-1	1420426	1187	M3	0.834165834165834	SigA	0.993006993006993	cacatttgaaaaaatagttaaatcaaattatataGAGTGTTAaaacatgacgaaTACAGTATATTGTGATAAATtaaaaaatgtaggaggcgtcctcatga	UA224	UB6	UC4	1420426	1416925	1416925	NA, NA, gpsB, S611, S610, NA, S609, NA		SAOUHSC_01464, SAOUHSC_01463, SAOUHSC_01462, new_1418650_1419124_-1, new_1418475_1418648_-1, SAOUHSC_01460, new_1417246_1417328_-1, SAOUHSC_01459
U749	1	1420775	477	M4	0.638361638361638	SigA	0.981018981018981	ataagcaaaacttttcaattaattaaaattgtgtgtaaaaTTCCAACATtaacggtaaaTGTATTATAATATTATTGTgttaatgctgaaatcacgttaaa	UA3	UB1	UC1	1420775	1423734	1423734	S612, recU, pbp2		new_1420776_1420877_1, SAOUHSC_01466, SAOUHSC_01467
U750	-1	1421685	1509	M1	0.976023976023976	NM	0.992007992007992	gtaaaagcaggtgctttccaagcataataagcaaacaataaGATACCTagtaaaagaaCAACgaaaaatgcaataatcatgaagccaataatcttaataat	UA101	UB41	UC9	1421685	1421566	1421566
U751	-1	1426021	120	M3	0.97002997002997	SigA	0.982017982017982	tgtttgctactagttaaatatattaagcatttTAGTCGAAAAttaaagaaaaTGATTTATACTATTAAGTAAtggttaaatttaaaagggggcacgaacat	UA221	UB63	UC1	1426021	1424218	1424218	NA, nth, NA		SAOUHSC_01470, SAOUHSC_01469, SAOUHSC_01468
U752	-1	1427650	645	M3	0.555444555444555	SigA	1	atcattaccatttacacgttatcttttagtctagTTCTAGAACTtgaaagcggatTTTGTTAAAATGAATGAGTAttgtataacgaaaaaataaataggag	UA3	UB1	UC1	1427650	1426292	1426292	asnC		SAOUHSC_01471
U753	1	1430891	1270	M3	0.95004995004995	SigA	0.953046953046953	gttaaaaattgattatatcttttttcaatttcttgaagtaatatctctaaAAATTGATATctatctaatttATTTTTATCATGTAATTGTAtacttgttgc	UA19	UB3	UC3	-1	-1	-1
U754	-1	1434553	469	M3	0.991008991008991	SigA	0.998001998001998	caacttgtcatctagtttagctagagtcagtagattgcactaAACATGCATGagacttcaaatTGATATATACTATATTAGAAatgcaatataaggagaac	UA3	UB1	UC1	1434553	1426309	1426292	NA, S614, NA, S613, papS, birA, dinG, asnC		SAOUHSC_01476, new_1433949_1434188_-1, SAOUHSC_01475, new_1432700_1432805_-1, SAOUHSC_01474, SAOUHSC_01473, SAOUHSC_01472, SAOUHSC_01471
U755	-1	1435578	1242	M3	0.858141858141858	SigA	0.871128871128871	ttttgctttatattgaattaaacaaattattaaagtgtaaatGATTTGATAAaaacggcaaatGACAGTAAAATATTTATAAAggagagtgagtttattgt	UA237	UB70	UC16	1435578	1434826	1434826	NA		SAOUHSC_01477
U756	-1	1435665	801	M3	0.978021978021978	SigA	0.997002997002997	ttcaccttcaatttccatattatgattttatAACTACACATgtgtggcaaatTGGTGTATTATCATGTTGTCtaagtgtttttggacttttgctttatatt	UA3	UB1	UC1	1435665	1434826	1434826	NA		SAOUHSC_01477
U757	-1	1445215	690	M4	0.907092907092907	SigA	1	aattgaaatttaaaaatgataagtaatcttaatgcttcaaaagaTTTTAATTTcttacatatAATGTTAATATGAATAGTGataatatcgtgaggtgtaga	UA3	UB1	UC1	1445215	1442289	1442289	NA, S617, ubiE, gerCC, S616, ndk		SAOUHSC_01488, new_1444476_1444600_-1, SAOUHSC_01487, SAOUHSC_01486, new_1442803_1442911_-1, SAOUHSC_01485
U758	1	1445579	1515	M1	0.988011988011988	NM	0.999000999000999	cttagaagaacattacaatttatgtacaggttgtaagtattaaaagcaaaataaaaagccCTTattcagggctttttaagtaaaattattttacagcatct	UA101	UB41	UC9	1445579	1445647	1445647
U759	-1	1445924	451	M3	0.623376623376623	SigA	0.987012987012987	tcaacgtttttgccacataaatgattgcgaTTTATGTAATgcttgtgttaaAGTTTTACCATAATGATATAaacatatcattatcaaacctcaggaggtga	UA93	UB1	UC1	1445924	1445553	1445553	hu		SAOUHSC_01490
U760	-1	1448417	738	M3	0.694305694305694	SigA	0.996003996003996	aagttttaagtgctgatttttatcattacagtaataaactcATTTTGAATAcacagtctcaTGTGATATTATTAAAAAGATataagaaagagaggaagtta	UA3	UB1	UC1	1448417	1445621	1445553	engA, gpsA, S618, hu		SAOUHSC_01492, SAOUHSC_01491, new_1445926_1446046_-1, SAOUHSC_01490
U761	-1	1449809	1185	M3	0.948051948051948	SigA	0.992007992007992	atatgactatttcgcaaaatgtaatcgaggtagaatTTCTTGACAAttctgtcagttTATAAGATGTTATAAATATGtagtgtataaggaggcaaacaaga	UA233	UB6	UC4	1449809	1448426	1445621	rpsA, S619	engA, gpsA, S618, hu	SAOUHSC_01493, new_1448419_1448574_-1	SAOUHSC_01492, SAOUHSC_01491, new_1445926_1446046_-1, SAOUHSC_01490
U762	-1	1450061	1276	M3	0.96003996003996	SigA	1	tcttactattcaaatgtaaaagttgcttatttgcgtggcttttTGTTTTATAAaagtataaaatTTTACTATAATATATCTTGTagagaacaatgaaatga	UA189	UB3	UC3	1450061	1445944	1445604	S620, rpsA, S619, engA, gpsA, S618	hu	new_1449811_1450025_-1, SAOUHSC_01493, new_1448419_1448574_-1, SAOUHSC_01492, SAOUHSC_01491, new_1445926_1446046_-1	SAOUHSC_01490
U763	1	1451176	788	M3	0.998001998001998	SigA	1	ctaatgcaatattaatggctttcatgcgtcatttccctTCCTTGTCGTtttatgaataaTATTTTATCATAATTAGGTAaattaaatataggaggaaatat	UA3	UB1	UC1	1451176	1452175	1452175	ansA		SAOUHSC_01497
U764	-1	1451180	743	M4	0.956043956043956	SigA	0.999000999000999	atgaataacaagtagatgtttcatatatttcctcctatatttaatttacctaatTATGATAAAATATTATTCAtaaaacgacaaggaagggaaatgacgca	UA3	UB1	UC1	1451180	1450415	1450415	S621, cmk		new_1451033_1451180_-1, SAOUHSC_01496
U765	-1	1453316	634	M4	0.687312687312687	SigA	0.999000999000999	tcaaaaatatatcataaatcttcaagcacagactTAGCGCATCaatcactgaACTGTTATAATAGTTTGGGattaaaggaggccgaaacaatgcaaaaagt	UA3	UB1	UC1	1453316	1452319	1452319	NA		SAOUHSC_01499
U766	-1	1455268	1346	M3	0.984015984015984	SigA	1	aaagttgcaaaatttatttctcagatagtatTACTTTACTAaaagaaaattgaCAAGCTATAATTAGTGTATAcacaattgaaaaatgattgaaataattt	UA131	UB8	UC3	1455268	1453577	1453577	S622, ebpS		new_1455149_1455268_-1, SAOUHSC_01501
U767	1	1457003	932	M4	0.789210789210789	SigA	0.997002997002997	caattttgtataagtaatataagtttgatttaataatgtaggtttcattattattTTTGATAAAATAGTATATTctccactttctaattcaaacatcattg	UA49	UB29	UC1	1457003	1457258	1457989		S623, S624, fer		new_1457273_1457494_1, new_1457496_1457754_1, SAOUHSC_01504
U768	1	1457273	509	M3	0.999000999000999	SigA	0.999000999000999	aaaatcaatttgtaattggttttctttaatgtagTTATAGACAAtctttacagttTCTTGTATCTTATTATTTTGagagattggtacaaaatgaaaaacat	UA3	UB1	UC1	1457273	1457989	1457989	S623, S624, fer		new_1457273_1457494_1, new_1457496_1457754_1, SAOUHSC_01504
U769	1	1457496	430	M4	0.77022977022977	SigA	0.998001998001998	ttttctaaaaatagctcaaaagacggataTTTTAATagtggtaaacTGTGATATAATGACAACTGttgttgactacaagcgtcaaaaaaggtttggtgaga	UA51	UB1	UC1	1457496	1457989	1457989	S624, fer		new_1457496_1457754_1, SAOUHSC_01504
U770	-1	1457705	1163	M4	0.958041958041958	SigA	0.999000999000999	caagtatccatatcaacgattgtatattttgccaatgtCTTCGCCTCctttgataaaAATGCTAAAATAGTAATGTgactaaaattttagacagcatcatt	UA194	UB53	UC4	1457705	1455277	1453696	S625, NA, recQ2	S622, ebpS	new_1457624_1457705_-1, SAOUHSC_01503, SAOUHSC_01502	new_1455149_1455268_-1, SAOUHSC_01501
U771	-1	1458854	157	M3	0.993006993006993	SigA	0.999000999000999	acgtaactatgatttaatttaagcatagTTATTGAGGTtttgtgatataTAGTATAAAATTAATGAGAAttaaatttaataatgtaaaattcatcttcggg	UA238	UB26	UC1	1458854	1458082	1458082	S626, NA		new_1458631_1458854_-1, SAOUHSC_01505
U772	-1	1461261	1233	M1	0.932067932067932	NM	0.97002997002997	aaatgggtgatgagctatgtttaaaaaggcgaaattaatcttaatagcaacgctactgttatcaggatgttcagcgatgaataatgaatcaaaaaaagaca	UA239	UB35	UC2	-1	-1	-1
U773	-1	1462959	1463	M3	0.959040959040959	SigA	0.986013986013986	gaaaagcgtataaataaaaacagaaactcatttttaaaaactgaaAAATTGAAATaaactagaaaaTATAGTATCATTATGGTATAtaaaggagttgattt	UA27	UB7	UC3	1462959	1462808	1462808	S627		new_1462761_1462959_-1
U774	-1	1463835	699	M3	0.97002997002997	SigA	0.991008991008991	ctgggtggttgtttttgttcgccattatgttctGTCTACATCTttttgcgcaagTTGTGTATCATAATACTTAAttgtgttaaaagaggtggaaatatgaa	UA3	UB1	UC1	1463835	1462808	1462808	NA, S627		SAOUHSC_01514, new_1462761_1462959_-1
U775	-1	1464394	1265	M3	0.745254745254745	SigA	0.999000999000999	taatagaataagtagttttggtaagtttagcacgatttaGTATTTACTTagaataaaaatTTTGCTACATTAATTATAGGgaatcttacagttattaaata	UA198	UB3	UC3	1464394	1463845	1462808	S629, S628	NA, S627	new_1464218_1464389_-1, new_1463887_1464034_-1	SAOUHSC_01514, new_1462761_1462959_-1
U776	-1	1481015	1394	M2	0.989010989010989	SigB	0.989010989010989	tccaagtgatgatttaaacacagttattggacgtactaAAGATAAAaatggtacatcttGGGTAGGAGagaatacaagagcaccgtatgtaacagtaattg	UA12	UB7	UC3	1481015	1480352	1480352	S630, NA		new_1480585_1480675_-1, SAOUHSC_01528
U777	1	1502155	419	M3	0.904095904095904	SigA	0.998001998001998	tcccaaaagtttcaacaacatcatcagaattgAAATTGTCATatgttgcaaaaTGTGATAGTATTTTTTGTTGtaaggtcatattaataactccttatata	UA77	UB1	UC1	1502155	1502189	1502189
U778	1	1502971	798	M3	0.826173826173826	SigA	0.898101898101898	atccttctgatcttgtgttcatttgtttatgctccttTCGTGTATAATGTTGTTATCaacctaaggaggtgataacatgcccttgacatctgatgaatttg	UA3	UB1	UC1	1502971	1503362	1503362	NA		SAOUHSC_01572
U779	-1	1503880	1482	M3	0.951048951048951	SigA	0.988011988011988	catatcatagtaaagttttttacgaaaaaaacgtatttaATGTTGACAAtacgaaaatttCGTATTATATTAGGTTTACGaaaggcggtgacaacatgaaa	UA240	UB71	UC10	1503880	1499749	1499749	NA, NA, S633, NA, NA, S632, NA, NA, NA, NA		SAOUHSC_01574, SAOUHSC_01573, new_1502933_1503320_-1, SAOUHSC_01571, SAOUHSC_01570, new_1502177_1502254_-1, SAOUHSC_01568, SAOUHSC_01567, SAOUHSC_01566, SAOUHSC_01565
U780	1	1503945	263	M3	0.999000999000999	SigA	1	tttcgtattgtcaacattaaatacgtttttttcgtaaaaAACTTTACTAtgatatgaaaaTTTCGTATAATAAGAAAAAAggaggtaagtaatatgaacaa	UA10	UB1	UC1	1503945	1506405	1506405	NA, NA, NA, S634		SAOUHSC_01575, SAOUHSC_01576, SAOUHSC_01577, new_1505987_1506144_1
U781	-1	1507671	255	M3	0.816183816183816	SigA	0.999000999000999	cctttcatatctccgagttgacgggtTACTTGATTTtgagaatagataTCTGATAATTTATTAATAAAtatctgcatatattttgtatcaagtttgtttaa	UA135	UB1	UC1	1507671	1507314	1507314
U782	-1	1511531	1137	M3	0.984015984015984	SigA	1	aatttatacaaaaatataaagtttgataaagTTATTTATTTgattataaaaaTAGGGTAAAATATAGATATAttgtattaattaaattattcgaggtgtca	UA157	UB9	UC4	1511531	1508198	1508198	S637, NA, NA, S636		new_1511430_1511530_-1, SAOUHSC_01584, SAOUHSC_01583, new_1508170_1508539_-1
U783	1	1516375	522	M3	0.931068931068931	SigA	0.988011988011988	atacataatatctacctcgtattgcgtcaTATGTGCATAattctctaaaaTATTATAGCATGAAAATAACttacttttaaattggggtgataacaaaatgc	UA3	UB1	UC1	-1	-1	-1
U784	-1	1516380	315	M4	0.648351648351648	SigA	0.997002997002997	taatagaaatttatcagtgcctgttgcattttgttatcaccccaaTTTAAAAgtaagttattttCATGCTATAATATTTTAGAgaattatgcacatatgac	UA1	UB1	UC1	1516380	1511734	1511734	scpA, scpB, rluB, S638, srrA, srrB		SAOUHSC_01589, SAOUHSC_01588, SAOUHSC_01587, new_1514192_1514323_-1, SAOUHSC_01586, SAOUHSC_01585
U785	-1	1518445	594	M3	0.994005994005994	SigA	0.998001998001998	attataatcattctaaataacaaatgagaaaAGCTTGCATTttattgagaaaACTGTTAGTTTTAATTGTAAagtttgaaataatttgtaatgattttaat	UA3	UB1	UC1	1518445	1517004	1517004	fur, xerD		SAOUHSC_01592, SAOUHSC_01591
U786	1	1519054	567	M3	0.722277722277722	SigA	0.997002997002997	actgttcgatcaattgttttttcatttaaatccattataatcacgtTCCTTTAAATtcatattatatATTGATACACTATGCTTGTTagctaaagtgtatc	UA3	UB1	UC1	1519054	1520022	1520022	NA		SAOUHSC_01594
U787	-1	1519093	566	M3	0.75024975024975	SigA	0.995004995004995	aattcagataatgaaataccactttttaatatattTTTTTGCATGtctgttctcctTTCGATACACTTTAGCTAACaagcatagtgtatcaatatataata	UA3	UB1	UC1	1519093	1517004	1517004	NA, fur, xerD		SAOUHSC_01593, SAOUHSC_01592, SAOUHSC_01591
U788	1	1521337	259	M3	0.994005994005994	SigA	0.999000999000999	tatagaatgcaatttatcaactttacataattgagacAAGTTGATTAtctttcctaatATATATACAATAATAAGAAAatataacatacaaatcaaaaact	UA135	UB1	UC1	1521337	1522198	1522198	S639, proC		new_1521337_1521424_1, SAOUHSC_01597
U789	-1	1521342	520	M3	0.959040959040959	SigA	0.979020979020979	agtttcattaacgtcacatccctttagTTTTTGATTTgtatgttatatTTTCTTATTATTGTATATATattaggaaagataatcaacttgtctcaattatg	UA3	UB1	UC1	1521342	1520149	1520149	NA, NA		SAOUHSC_01596, SAOUHSC_01595
U790	-1	1523271	529	M4	0.918081918081918	SigA	1	agacgaatttttaacagattttgattcaagtataaattaaaactaaattgatacaaatttTATGATAAAATGAATTGAAgaaaaggaggggcatatatgga	UA3	UB1	UC1	1523271	1522291	1522291	rnz		SAOUHSC_01598
U791	1	1523389	339	M3	0.926073926073926	SigA	0.997002997002997	tctttgctagttaatttttctaactttaacgtagacatAACTATATAAattttgataatTACGTTATACTTATCATTAAtaagtatcacattaaacatgat	UA15	UB1	UC1	1523389	1526125	1526125	S640, zwf, S641, NA		new_1523388_1523547_1, SAOUHSC_01599, new_1525080_1525222_1, SAOUHSC_01600
U792	1	1525224	981	M3	0.999000999000999	SigA	0.999000999000999	cccaaaactattttaataatcattgaacaaaTGGGTGTATAatttatagaaaTAATGTAGAATAAAAATAAAtgattgaattaattggagtgaaagttttg	UA67	UB33	UC1	1525224	1526125	1526125	NA		SAOUHSC_01600
U793	-1	1528953	1310	M3	0.988011988011988	SigA	1	atcgttttatgcaatcgtttgcacaaatCTTTTGACTTttttagaaagtGTGACTAAACTGGTATTATAcagtggttggaagcgttttccgatgcagaaat	UA4	UB3	UC3	1528953	1526269	1526269	malR, malA		SAOUHSC_01602, SAOUHSC_01601
U794	-1	1531129	122	M4	0.888111888111888	SigA	1	agaaataatcaaaatagttgcgcgacattcgaaatgatttagtgtagtgtatgtctatttTGTGATACAATACTAATGAaaaatcaacaagtgaggtaagt	UA241	UB57	UC1	1531129	1529091	1529091	gnd, S642, NA, NA		SAOUHSC_01605, new_1529461_1529659_-1, SAOUHSC_01604, SAOUHSC_01603
U795	-1	1532432	1356	M3	0.816183816183816	SigA	0.999000999000999	cattatacgatatctttgaaaaatcaatcaataTATTTTTGACaaagcttagttTGAGTTACAATAATTATATAtaataaattgaaaataatatgacacaa	UA242	UB28	UC3	1532432	1529686	1529108	S643, NA, gnd	S642, NA	new_1532287_1532432_-1, SAOUHSC_01606, SAOUHSC_01605	new_1529461_1529659_-1, SAOUHSC_01604
U796	1	1532479	890	M3	0.971028971028971	SigA	0.995004995004995	tatataattattgtaactcaaactaagctttgtcaaaaatATATTGATTGatttttcaaagaTATCGTATAATGAGGAAAATgacataagcaaacttactc	UA75	UB1	UC1	1532479	1532738	1532738	S644, NA		new_1532483_1532548_1, SAOUHSC_01607
U797	-1	1534333	539	M3	0.999000999000999	SigA	1	aaattgtgtctaaatataggtgtgattcagattagtTTATTGAACAatatgttattaATTAGTAGAATGAGGATAGTttaaatataaagggataggtgatt	UA3	UB1	UC1	1534333	1532882	1532882	NA, NA		SAOUHSC_01610, SAOUHSC_01609
U798	-1	1541674	143	M3	0.746253746253746	SigA	1	aaaccatgtttaccctttttacgtaaaggtgttTAGTAGTCGTaaatcagtgcaTGTGTTAAAATAAATGTATAaatattcgtaatcagaggtgtttactg	UA205	UB26	UC1	1541674	1532882	1532882	argR, recN, S646, lpdA, bfmBAA, bfmBAB, bmfBB, S645, NA, NA		SAOUHSC_01617, SAOUHSC_01615, new_1539337_1539486_-1, SAOUHSC_01614, SAOUHSC_01613, SAOUHSC_01612, SAOUHSC_01611, new_1534335_1534608_-1, SAOUHSC_01610, SAOUHSC_01609
U799	-1	1545564	975	M4	0.815184815184815	SigA	1	aaaattgagcaatatcttgcaccaggtggatatggtgttcgaatagagtcagCATGTTATACTAATTATACgataccgccatattatgattcgatggtagc	UA243	UB33	UC1	1545564	1542079	1542079	NA, nusB, xseA, xseB, ispA		SAOUHSC_01622, SAOUHSC_01621, SAOUHSC_01620, SAOUHSC_01619, SAOUHSC_01618
U800	-1	1547198	646	M3	0.999000999000999	SigA	0.999000999000999	actttgggatagacttataatgtcgccagcaatatgaacaTGCTTGAATTgaagagttgtcTCAAGTAAAATAGACGGGTAgatgaaaacaaactgaagga	UA3	UB1	UC1	1547198	1541688	1534650	accB, accC, NA, nusB, xseA, xseB, ispA, S647	argR, recN, S646, lpdA, bfmBAA, bfmBAB, bmfBB	SAOUHSC_01624, SAOUHSC_01623, SAOUHSC_01622, SAOUHSC_01621, SAOUHSC_01620, SAOUHSC_01619, SAOUHSC_01618, new_1541676_1542035_-1	SAOUHSC_01617, SAOUHSC_01615, new_1539337_1539486_-1, SAOUHSC_01614, SAOUHSC_01613, SAOUHSC_01612, SAOUHSC_01611
U801	1	1547545	1514	M1	0.985014985014985	NM	0.988011988011988	ttattttaaaaataaaaagcctcatatcagcatataacctaTAATCattttaggcaataGCtttatgagacttatttagaatatcttacgttaaatcagta	UA101	UB41	UC9	1547545	1548174	1548174
U802	-1	1548287	1388	M2	0.998001998001998	SigB	0.998001998001998	caagttaacaactgtgttacagtagaacctgGTGTTTATatagaaggtttgggCGGTATAAGaatagaagatgatattttaattacagaaaatggttgtca	UA12	UB7	UC3	1548287	1547519	1547519	efp		SAOUHSC_01625
U803	1	1549313	330	M3	0.912087912087912	SigA	1	ttattctgctcatcttattacctcctagtgaaaCGTTTGTGCAtttcaactttaTACATTAAAATAATATCATAataaggataaaaaataatagatattga	UA1	UB1	UC1	1549313	1550180	1550180	NA, NA		SAOUHSC_01627, SAOUHSC_01628
U804	-1	1549325	562	M4	0.845154845154845	SigA	0.999000999000999	aaaccaattttttcattactatctccctaaaatcaatatcTATTATTTTttatccttatTATGATATTATTTTAATGTataaagttgaaatgcacaaacgt	UA3	UB1	UC1	1549325	1541688	1534650	pepQ2, efp, S648, accB, accC, NA, nusB, xseA, xseB, ispA, S647	argR, recN, S646, lpdA, bfmBAA, bfmBAB, bmfBB	SAOUHSC_01626, SAOUHSC_01625, new_1547200_1547474_-1, SAOUHSC_01624, SAOUHSC_01623, SAOUHSC_01622, SAOUHSC_01621, SAOUHSC_01620, SAOUHSC_01619, SAOUHSC_01618, new_1541676_1542035_-1	SAOUHSC_01617, SAOUHSC_01615, new_1539337_1539486_-1, SAOUHSC_01614, SAOUHSC_01613, SAOUHSC_01612, SAOUHSC_01611
U805	1	1551189	604	M3	0.995004995004995	SigA	0.999000999000999	caatttaactaaatgaataataattgcaattctttagtgaaatATTTTGATAAtttgacctaacAGTCTTATAATTATATTATCgtttaattagggaggat	UA3	UB1	UC1	1551189	1551795	1551795	NA, S650		SAOUHSC_01630, new_1551670_1551835_1
U806	-1	1551212	1210	M3	0.836163836163836	SigA	0.998001998001998	ataactaaaattattgcgatgtacaaactagcactcATCTTGCATCctccctaattaAACGATAATATAATTATAAGactgttaggtcaaattatcaaaat	UA167	UB6	UC4	1551212	1550239	1550239	S649, lipM		new_1551078_1551208_-1, SAOUHSC_01629
U807	-1	1556157	1146	M3	0.842157842157842	SigA	0.997002997002997	taagacaatcaagcagttaaatGACTTGTATTgctcgcggaattTAAGATATAATGAAATCGCAttcaagaaatttgatagtcatttgctatcaatttcag	UA244	UB72	UC4	1556157	1551922	1551922	S652, gcvT, gcvPA, gcvPB, S651		new_1555937_1556066_-1, SAOUHSC_01634, SAOUHSC_01633, SAOUHSC_01632, new_1551879_1551985_-1
U808	-1	1556664	590	M3	0.996003996003996	SigA	0.999000999000999	atgctaacagcaatttatttttccattttCACTTTTTATatcagtcaataTAGTTTAAAATTAAAGACATtatataatattgaaactgactataactataa	UA3	UB1	UC1	1556664	1555271	1551922	aroK, S652, gcvT	gcvPA, gcvPB, S651	SAOUHSC_01635, new_1555937_1556066_-1, SAOUHSC_01634	SAOUHSC_01633, SAOUHSC_01632, new_1551879_1551985_-1
U809	1	1563774	109	M3	0.908091908091908	SigA	0.997002997002997	ctatttcatctttgtgttcaagcactttcGCTTTGTCAAaacgtatttcTTGGGTAGACTTGATATGTTgtttaaaaatgactacttgtttttttctttta	UA245	UB42	UC1	-1	-1	-1
U810	-1	1564508	1176	M3	0.961038961038961	SigA	1	aataaattttagaattgtcgcataattcatcatgacaacATAATGACATgtattgttattAACGATATAATAGAATTGAAtaaagtgggtgataatgtgac	UA246	UB6	UC4	1564508	1560337	1560337	NA, NA, NA, NA, glcK, NA, NA		SAOUHSC_01650, SAOUHSC_01649, SAOUHSC_01648, SAOUHSC_01647, SAOUHSC_01646, SAOUHSC_01645, SAOUHSC_01644
U811	-1	1564876	389	M3	0.871128871128871	SigA	0.999000999000999	acctgacgattgtgtagcgcatggttgtaaaattttaACTTTGCAAatattatagatGTTGGTATAATAATAAAGTCgtatttagaaatgataaggaggaa	UA20	UB1	UC1	1564876	1564672	1564672	rpmG		SAOUHSC_01651
U812	-1	1567062	316	M3	0.995004995004995	SigA	0.997002997002997	cggtctcttaaatgagaccgttatttttttgtcaaaaAGATAGAAATaatttctaaatTCATATATGATTTAAAGTGAaagactttgaatagaggtaggta	UA1	UB1	UC1	1567062	1564672	1564672	pbp3, rpmG		SAOUHSC_01652, SAOUHSC_01651
U813	-1	1567859	1375	M2	0.901098901098901	SigB	0.901098901098901	tcgtatgattttatggcaaatctgttaactttttatatacaaaATGTTTAAttatttttgatttgAGTTATATTaaatgagtagagaaaataataagtagt	UA197	UB7	UC3	1567859	1567154	1567154	S653, sodA		new_1567739_1567859_-1, SAOUHSC_01653
U814	-1	1570095	964	M3	0.953046953046953	SigA	0.961038961038961	ttttgagtcgtaaacattaCTGTTTACATatgttactaggAGTTGTATAGTTGAATGCGAggtgagaatacgatgacaccagtctttgaattgaaaaatgt	UA144	UB33	UC1	1570095	1568021	1568021	znuC, znuB, zur		SAOUHSC_01657, SAOUHSC_01656, SAOUHSC_01655
U815	-1	1572509	735	M3	0.999000999000999	SigA	1	tctaaattttgaaatttcgaggttttaatatttTTATTTAAAAtagcacatttaTACTTTATAATAGTAAAGATgaacatataaggaggccaaatcatggc	UA3	UB1	UC1	1572509	1568021	1568021	NA, nfo, S654, znuC, znuB, zur		SAOUHSC_01659, SAOUHSC_01658, new_1570102_1570204_-1, SAOUHSC_01657, SAOUHSC_01656, SAOUHSC_01655
U816	-1	1577660	478	M3	0.975024975024975	SigA	0.999000999000999	atccattatattgaacaaaataaatcgaaaTGATTTCATTtttgtcgaaaaTTAGGTATAATAGTATAACTaatgcttaataggtgatttaatttgcgaat	UA3	UB1	UC1	1577660	1568123	1568021	dnaG, S656, sigA, NA, NA, S655, NA, nfo, S654, znuC, znuB, zur		SAOUHSC_01663, new_1575605_1575827_-1, SAOUHSC_01662, SAOUHSC_01661, SAOUHSC_01660, new_1572511_1572586_-1, SAOUHSC_01659, SAOUHSC_01658, new_1570102_1570204_-1, SAOUHSC_01657, SAOUHSC_01656, SAOUHSC_01655
U817	-1	1579176	1177	M3	0.972027972027972	SigA	1	ttgatagattatttaaaggcaagtaaaattaatgTGTTTGTGACatgaaagaaatATCGGTATAATAATAGGTGAataaaaaaggggtgaagacctataga	UA246	UB6	UC4	1579176	1572560	1568021	S657, NA, NA, dnaG, S656, sigA, NA, NA	S655, NA, nfo, S654, znuC, znuB, zur	new_1579057_1579173_-1, SAOUHSC_01665, SAOUHSC_01664, SAOUHSC_01663, new_1575605_1575827_-1, SAOUHSC_01662, SAOUHSC_01661, SAOUHSC_01660	new_1572511_1572586_-1, SAOUHSC_01659, SAOUHSC_01658, new_1570102_1570204_-1, SAOUHSC_01657, SAOUHSC_01656, SAOUHSC_01655
U818	1	1579226	593	M3	0.998001998001998	SigA	0.998001998001998	ctattattataccgatatttctttcatgtcacaaacacattaatttTACTTGCCTTtaaataatctaTCAATTAGAATAAACGTACAgcgagttaaggata	UA3	UB1	UC1	1579226	1580899	1580899	S658, S659, glyS		new_1579233_1579395_1, new_1579397_1579474_1, SAOUHSC_01666
U819	-1	1579275	923	M4	0.440559440559441	SigA	0.685314685314685	aaattagtgtagtcactcgcttttattttaaaatgattcgttgCgccaatcttattgttAAGCTTACACTATccttaactcgctgtacgtttattctaatt	UA166	UB1	UC1	-1	-1	-1
U820	-1	1584937	1342	M4	0.472527472527473	SigA	0.933066933066933	tattttaaattaaagaaaaatgagtaagtcaatgcaaagaTGTTTAAATcaatcaattgCATGATATAATTAAGTAGATattaaagcatcatagaatgaat	UA131	UB8	UC3	1584937	1581026	1581026	S661, phoH, ybeY, dgkA, cdd, S660, era, recO		new_1584868_1584936_-1, SAOUHSC_01673, SAOUHSC_01672, SAOUHSC_01671, SAOUHSC_01670, new_1582465_1582689_-1, SAOUHSC_01668, SAOUHSC_01667
U821	-1	1587644	123	M3	0.991008991008991	SigA	0.994005994005994	aagttatatagtttataaataatcaaattgatattctataggttcttatAACTATAAAGtatattcaattTCATGTATAATTAATGTGAGggcgaggtgaa	UA247	UB57	UC1	1587644	1585191	1585191	S662, NA, NA, NA		new_1587577_1587644_-1, SAOUHSC_01677, SAOUHSC_01676, SAOUHSC_01675
U822	1	1587763	1519	M1	0.967032967032967	NM	0.972027972027972	tttttttaattaaaaattgacaacaaaaaaacatcacatattagtgtcagacactaacttgtgatgtttgttttatataattaatattcgtgttgagggag	UA101	UB41	UC9	1587763	1587988	1587988
U823	-1	1588081	897	M3	0.997002997002997	SigA	1	gtgattttgatgtgaaatatgtttcaaataaaaaacaatttacTAATTGACCAtaaattacagaTATATTATACTTATAAATGCatagttttactgtgcaa	UA75	UB1	UC1	1588081	1587792	1587792	S664, rpsU		new_1587997_1588081_-1, SAOUHSC_01678
U824	-1	1589917	725	M3	0.731268731268731	SigA	1	caaagctatcgtttagtgattccatctattcaattcGAGTCGAATTtaaaattaattTGTGATACTATTGATAATTAtgactatattcttattgcatatga	UA3	UB1	UC1	1589917	1587792	1587792	NA, S665, S664, rpsU		SAOUHSC_01679, new_1588083_1588288_-1, new_1587997_1588081_-1, SAOUHSC_01678
U825	1	1592119	1505	M1	0.836163836163836	NM	0.84015984015984	tcttttgttgtaccaaataccgcttcttcaaatgttaatgtcattgtatactgaagaTCATcacctttttgcggtgcatttggatctctttgtctgccgcc	UA248	UB41	UC9	-1	-1	-1
U826	-1	1596210	1244	M3	0.912087912087912	SigA	0.996003996003996	gctttcctaataaatgattaaaaaaaattgaaatttcgagtctttaACATTGACTTactttgaccaaTTTGATAAATTATAATTAGCacttgagataagtg	UA107	UB43	UC3	1596210	1587792	1587792	hrcA, grpE, dnaK, S666, dnaJ, prmA, rsmE, NA, S665, S664, rpsU		SAOUHSC_01685, SAOUHSC_01684, SAOUHSC_01683, new_1592478_1592592_-1, SAOUHSC_01682, SAOUHSC_01681, SAOUHSC_01680, SAOUHSC_01679, new_1588083_1588288_-1, new_1587997_1588081_-1, SAOUHSC_01678
U827	1	1599917	835	M4	0.671328671328671	SigA	1	ggatgaactttgaaattataacaatctttaTTTAAATacatacttgcgaTATGTTAATATGTTAATTAcgtacttataattataaaacgtattgattgtgt	UA3	UB1	UC1	1599917	1600347	1600347	S670, rpsT		new_1599922_1600105_1, SAOUHSC_01689
U828	-1	1599931	688	M3	0.984015984015984	SigA	1	taaaattttgcagatttaataaattGTGTTGGAAAcacaatcaataCGTTTTATAATTATAAGTACgtaattaacatattaacatatcgcaagtatgtatt	UA3	UB1	UC1	1599931	1596207	1587792	S669, lepA, S668, S667, hemN	hrcA, grpE, dnaK, S666, dnaJ, prmA, rsmE, NA, S665, S664, rpsU	new_1599761_1599931_-1, SAOUHSC_01688, new_1597755_1597936_-1, new_1597375_1597625_-1, SAOUHSC_01686	SAOUHSC_01685, SAOUHSC_01684, SAOUHSC_01683, new_1592478_1592592_-1, SAOUHSC_01682, SAOUHSC_01681, SAOUHSC_01680, SAOUHSC_01679, new_1588083_1588288_-1, new_1587997_1588081_-1, SAOUHSC_01678
U829	-1	1601409	700	M3	0.583416583416583	SigA	0.992007992007992	tgattcaagctcttatggaaatgcaagTGGTTTATAgatacagaaaCATGATATAATCTATTGATGtgtcaaacgaatgaaagggtgtaatgaatgagcga	UA3	UB1	UC1	1601409	1600440	1600440	holA		SAOUHSC_01690
U830	1	1602047	908	M4	0.899100899100899	SigA	0.975024975024975	taatatgactaataatatattccacttcaccaatatggtcattgtgtggaTGTGTTAAAATTAGATACTctaattcatttatccctctttcatttagcgtt	UA108	UB1	UC1	-1	-1	-1
U831	-1	1604156	885	M3	0.966033966033966	SigA	1	actgaaatcttatttcacgacataatggattatttTAATTGCAAAttttattttttGTGATTAATCTTATATTATTagaaaatgttactaaattttaagta	UA75	UB1	UC1	1604156	1603534	1603534	S671, comEB		new_1604071_1604156_-1, SAOUHSC_01692
U832	-1	1604894	681	M1	0.557442557442557	NM	0.596403596403596	agatgcagaaagattgtttttcattgcgaaaaaataaaagtaAAAccactcgctcagacGTGTATAaagttgaggagtggttttattgtatcaatttttat	UA3	UB1	UC1	1604894	1604333	1604333	comEA		SAOUHSC_01693
U833	-1	1610628	708	M4	0.996003996003996	SigA	1	aaagttttatacagtaatgaaaatcatgatacttgtcgttgtagtgattaaaaTGTGATAAAATAACAAATGctaggattttttaaaagaggtgaatcaaa	UA3	UB1	UC1	1610628	1604928	1604928	pfs, NA, NA, aroE, NA, nadD, NA, rsfS, NA		SAOUHSC_01702, SAOUHSC_01701, SAOUHSC_01700, SAOUHSC_01699, SAOUHSC_01698, SAOUHSC_01697, SAOUHSC_01696, SAOUHSC_01695, SAOUHSC_01694
U834	1	1610855	125	M3	0.823176823176823	SigA	0.996003996003996	actaatcatatcaattacatcaaccaatcgtgtcaagaAACTTTATTAaataacaggaaAATGATATGTTTAAAATAATaatgatgaaataagaggatttt	UA249	UB26	UC1	1610855	1611193	1611193	NA		SAOUHSC_01704
U835	-1	1613827	281	M3	0.656343656343656	SigA	0.998001998001998	tttttctattgattgagaaaatagttatttATATAGTTTTtaaagaaaaaaAGTGATAATATTTAGCTAATctaatgaaaattgatttattggacaaaaaa	UA99	UB1	UC1	1613827	1612595	1612595	S672, NA		new_1613757_1613827_-1, SAOUHSC_01706
U836	-1	1619648	1226	M4	0.974025974025974	SigA	0.998001998001998	tttgttattatatgcgatttgaattacttattAAACAACTTgtgcttctcAATGATACAATGAAAAGGTattcaatactggtttattgcaatacaaagggg	UA183	UB24	UC4	1619648	1613972	1613972	S675, NA, S674, NA, NA, NA, NA, NA, S673		new_1619567_1619648_-1, SAOUHSC_01712, new_1618780_1618864_-1, SAOUHSC_01711, SAOUHSC_01710, SAOUHSC_01709, SAOUHSC_01708, SAOUHSC_01707, new_1613928_1614044_-1
U837	-1	1624070	714	M4	0.997002997002997	SigA	0.999000999000999	tttttaagtcaagcaatgtataaataattaacgcTTATAATTTtattgaaaaTATGGTAAAATATCTAAAGttaaattttatatgaatgattcgcttctat	UA3	UB1	UC1	1624070	1619786	1619786	S676, NA, NA, NA, udk, greA		new_1623897_1624070_-1, SAOUHSC_01718, SAOUHSC_01717, SAOUHSC_01716, SAOUHSC_01715, SAOUHSC_01714
U838	-1	1625239	974	M3	0.821178821178821	SigA	1	aatcattaagctttattaaagattacattaaaaATCTATAATTtaaagccataaTATTGTATGATGATAGTGAGttatatttgtaattaaaggagtgtcgc	UA243	UB33	UC1	1625239	1624087	1619888	NA, NA, NA	S676, NA, NA, NA, udk, greA	SAOUHSC_01721, SAOUHSC_01720, SAOUHSC_01719	new_1623897_1624070_-1, SAOUHSC_01718, SAOUHSC_01717, SAOUHSC_01716, SAOUHSC_01715, SAOUHSC_01714
U839	-1	1628209	888	M3	1	SigA	1	tgggagaaatcacgccgtatgactttatagaACGTTGACAAcaagcgtaaatGTAACTAAAATAGAATTAAAttcgtataaagatgagtagttaatgattt	UA75	UB1	UC1	1628209	1624087	1619786	S678, S677, alaS, NA, NA, NA	S676, NA, NA, NA, udk, greA	new_1628019_1628209_-1, new_1627890_1628017_-1, SAOUHSC_01722, SAOUHSC_01721, SAOUHSC_01720, SAOUHSC_01719	new_1623897_1624070_-1, SAOUHSC_01718, SAOUHSC_01717, SAOUHSC_01716, SAOUHSC_01715, SAOUHSC_01714
U840	-1	1631408	967	M4	0.520479520479521	SigA	0.999000999000999	gatattagattatattttattcgttgttaagtgattcGAGACATacaatttatcaaGATGTTATAATTGATGAGAAatgaggttcgtaaatgatagatcaa	UA144	UB33	UC1	1631408	1624206	1619939	NA, NA, S678, S677, alaS, NA, NA, NA	S676, NA, NA, NA, udk, greA	SAOUHSC_01724, SAOUHSC_01723, new_1628019_1628209_-1, new_1627890_1628017_-1, SAOUHSC_01722, SAOUHSC_01721, SAOUHSC_01720, SAOUHSC_01719	new_1623897_1624070_-1, SAOUHSC_01718, SAOUHSC_01717, SAOUHSC_01716, SAOUHSC_01715, SAOUHSC_01714
U841	-1	1634199	327	M3	0.74025974025974	SigA	0.999000999000999	taaagcgataaacttaaaaaagcCTATCGAAAAgcatgtgtagaaAATGGTAAAATATAATTAAAaacattataaataaagttaaacagaaaagtagaaaa	UA1	UB1	UC1	1634199	1624087	1619786	S680, NA, mnmA, mnmA, S679, NA, NA, S678, S677, alaS, NA, NA, NA	S676, NA, NA, NA, udk, greA	new_1634102_1634199_-1, SAOUHSC_01727, SAOUHSC_01726, SAOUHSC_01725, new_1631410_1631840_-1, SAOUHSC_01724, SAOUHSC_01723, new_1628019_1628209_-1, new_1627890_1628017_-1, SAOUHSC_01722, SAOUHSC_01721, SAOUHSC_01720, SAOUHSC_01719	new_1623897_1624070_-1, SAOUHSC_01718, SAOUHSC_01717, SAOUHSC_01716, SAOUHSC_01715, SAOUHSC_01714
U842	1	1635622	1496	M1	0.963036963036963	NM	0.976023976023976	atgcaaatatgaaagcgccccttcaactttacactgtgtaagtgtttatttgatggggcgCtttcaaaatattgaaaagcatatccaaaatttaaagaaat	UA90	UB23	UC9	1635622	1635843	1635843
U843	-1	1636072	1447	M2	1	SigB	1	aatcgtataaatactatactataacataaaaacttcatattataATGTTTAGcgaacctccttagTGGTATATAaatatatacatccaaggaggtttcact	UA12	UB7	UC3	1636072	1635596	1635596	csbD, NA		SAOUHSC_01730, SAOUHSC_01729
U844	1	1636081	1522	M1	0.979020979020979	NM	0.98001998001998	tcgtctgccatagtgaaacctccttggatgtatatatttataTACCACTaaggaggttCGCTAAacattataatatgaagtttttatgttatagtatagta	UA101	UB41	UC9	1636081	1636472	1636472
U845	-1	1636596	778	M4	0.971028971028971	SigA	1	taatggttctgtactcacatttgtcacacctttcttaTACTATCTtaactcaaaaAATGCTAAAATGGGAATATcaatattcgaattaagtgaggttatac	UA3	UB1	UC1	1636596	1636089	1635630	cymR, S682	csbD, NA	SAOUHSC_01732, new_1636074_1636203_-1	SAOUHSC_01730, SAOUHSC_01729
U846	1	1636597	1204	M4	0.933066933066933	SigA	0.996003996003996	tttagtagaaattttcattgtataacctcacttaattcgaatattgatatTCCCATTTTagcatttttTGAGTTAAGATAGTATAAGaaaggtgtgacaaa	UA46	UB6	UC4	1636597	1637951	1637951	NA		SAOUHSC_01734
U847	-1	1639262	1470	M3	0.676323676323676	SigA	0.998001998001998	cgaattcgtcactaaattttaaaaaatcaataaactttggtttgttaTAATTTCATTaattttaattaTGTGGTAATATAACATCATAagatagtcatctg	UA96	UB7	UC3	1639262	1638027	1638027	S685, NA, NA		new_1639007_1639262_-1, SAOUHSC_01736, SAOUHSC_01735
U848	-1	1642778	584	M3	1	SigA	1	gccttaaaatttatttttctgcgtagGGCTTGCAAAaatatgtgaaaGTAGTTATCATTGATATTGAattttataactaaaaccgttagtattcttgaaat	UA3	UB1	UC1	1642778	1638044	1638027	S687, S686, hisS, aspS, S685, NA, NA		new_1642486_1642778_-1, new_1642353_1642484_-1, SAOUHSC_01738, SAOUHSC_01737, new_1639007_1639262_-1, SAOUHSC_01736, SAOUHSC_01735
U849	-1	1646476	1164	M3	0.987012987012987	SigA	0.999000999000999	ttttgtaaaagttttaaaagtaggaaTAGTATACAAattaaactcgcTCAAGTAAAATTAATATTACgattaatgacgacaggataaatatttatcgtcga	UA194	UB53	UC4	1646476	1639268	1638027	S688, relA, dtd, lytH, S687, S686, hisS, aspS	S685, NA, NA	new_1646339_1646476_-1, SAOUHSC_01742, SAOUHSC_01741, SAOUHSC_01739, new_1642486_1642778_-1, new_1642353_1642484_-1, SAOUHSC_01738, SAOUHSC_01737	new_1639007_1639262_-1, SAOUHSC_01736, SAOUHSC_01735
U850	-1	1646583	610	M3	0.991008991008991	SigA	1	gttagatgattgagcattataccttaataacaTCGTTTATTTatttcataaatTGTAGTATCATAGAACTAATatttaaaaaatgaaacagtagatttagg	UA3	UB1	UC1	1646583	1639268	1638027	S689, S688, relA, dtd, lytH, S687, S686, hisS, aspS	S685, NA, NA	new_1646478_1646578_-1, new_1646339_1646476_-1, SAOUHSC_01742, SAOUHSC_01741, SAOUHSC_01739, new_1642486_1642778_-1, new_1642353_1642484_-1, SAOUHSC_01738, SAOUHSC_01737	new_1639007_1639262_-1, SAOUHSC_01736, SAOUHSC_01735
U851	-1	1649662	720	M4	0.991008991008991	SigA	1	aaatttaacaaaatatatataaataagttcCCGCATTCatttttaaaaAATGGTATAATTAAAGTCTtgattatttagataagtgctttttatttaaagta	UA3	UB1	UC1	1649662	1646782	1646782	S690, recJ, apt		new_1649580_1649662_-1, SAOUHSC_01744, SAOUHSC_01743
U852	-1	1652101	755	M3	0.992007992007992	SigA	0.998001998001998	atatgtataaggctaataaattttgtaagaaagatttAACTTGCGTTataaaatagtatTCAAGTATTCTAAATACATAcgtaaataatgaggtgttcatg	UA3	UB1	UC1	1652101	1649791	1649791	S691, secF		new_1652002_1652101_-1, SAOUHSC_01746
U853	-1	1652154	626	M4	0.687312687312687	SigA	0.996003996003996	aatttaaattaaatatatctatgactatTTTTACTCcctgctctagTATGTTAATATGTATAAGGctaataaattttgtaagaaagatttaacttgcgtta	UA3	UB1	UC1	1652154	1649808	1649791	S691, secF		new_1652002_1652101_-1, SAOUHSC_01746
U854	1	1652316	1523	M1	0.999000999000999	NM	1	aataagctattctacatactacttataacttaaaaaggatgaaacgctattcgtttcatcctttttaataccacttctcattatgaagggtcaacttgttt	UA101	UB41	UC9	1652316	1652503	1652503
U855	-1	1652719	390	M3	0.886113886113886	SigA	1	gaggaaacttttggtattcgtcttacTACTATTCATaatttacatttTCTGCTAAAATTAATGGAAGatataagacaagccattcgagaagatcgtctttt	UA20	UB1	UC1	1652719	1652171	1649808	yajC, S692	S691, secF	SAOUHSC_01747, new_1652156_1652296_-1	new_1652002_1652101_-1, SAOUHSC_01746
U856	-1	1653497	391	M4	0.781218781218781	SigA	0.904095904095904	gtggttacaacccggaaatgatattatcaaacacgctgggggattaCATAAATTcatgaattggGATGGTCCGATCCTTACAGattcaggcggtttccaag	UA20	UB1	UC1	1653497	1652171	1649808	yajC, S692	S691, secF	SAOUHSC_01747, new_1652156_1652296_-1	new_1652002_1652101_-1, SAOUHSC_01746
U857	-1	1653531	86	M4	0.545454545454545	SigA	0.645354645354645	aagcaaaaatcattttgggcaacacatatcatttgtggttacaacccggaAATGATATTATCAAACACGctgggggattacataaattcatgaattgggat	UA250	UB44	UC1	1653531	1652171	1649808	yajC, S692	S691, secF	SAOUHSC_01747, new_1652156_1652296_-1	new_1652002_1652101_-1, SAOUHSC_01746
U858	-1	1658270	643	M4	0.66033966033966	SigA	1	aagatttataaaagtaactgcataagagcccctaattatttacaatatataaggggctctaaTATGCTATAATTATTGGGAaaatgaaaattatatgtaaa	UA3	UB1	UC1	1658270	1652171	1649808	obgE, NA, ruvA, ruvB, queA, tgt, yajC, S692	S691, secF	SAOUHSC_01753, SAOUHSC_01752, SAOUHSC_01751, SAOUHSC_01750, SAOUHSC_01749, SAOUHSC_01748, SAOUHSC_01747, new_1652156_1652296_-1	new_1652002_1652101_-1, SAOUHSC_01746
U859	-1	1659669	769	M3	0.97002997002997	SigA	1	tgattataaagttccttaaaaaaacaaacaatgACATTGACATgaaacgtcgtcAATGGTAAGATGCAATAGTTgagtagttataagtagctacatacaac	UA3	UB1	UC1	1659669	1658274	1652341	S694, rplU, NA, rpmA, S693	obgE, NA, ruvA, ruvB, queA, tgt, yajC	new_1659502_1659667_-1, SAOUHSC_01757, SAOUHSC_01756, SAOUHSC_01755, new_1658272_1658570_-1	SAOUHSC_01753, SAOUHSC_01752, SAOUHSC_01751, SAOUHSC_01750, SAOUHSC_01749, SAOUHSC_01748, SAOUHSC_01747
U860	-1	1661094	541	M3	0.995004995004995	SigA	1	tttacggagttgttcattttcaaagtaattcgtagttagTGCTTTATTTcataatgggagTAATATAAAATAGAAAAGGAtatacaatattttgacataat	UA3	UB1	UC1	1661094	1659685	1652341	mreC, mreD	S694, rplU, NA, rpmA, S693, obgE, NA, ruvA, ruvB, queA, tgt, yajC	SAOUHSC_01759, SAOUHSC_01758	new_1659502_1659667_-1, SAOUHSC_01757, SAOUHSC_01756, SAOUHSC_01755, new_1658272_1658570_-1, SAOUHSC_01753, SAOUHSC_01752, SAOUHSC_01751, SAOUHSC_01750, SAOUHSC_01749, SAOUHSC_01748, SAOUHSC_01747
U861	1	1661156	76	M5	0.952047952047952	NM	0.989010989010989	tcccattatgaaataaagcactaactacgaattactttgaaaatgaacaactccgtaaaaaatttgtggcattttaaaaacaaaaaaactactagcaaaca	UA169	UB32	UC1	1661156	1661190	1661190
U862	-1	1661947	1109	M3	0.912087912087912	SigA	0.991008991008991	gaacgtgcatcagtcctaagatatatcatgattaaggCTGAAGACTGaggaaaatataCATAATAAAATATATAATTAgatgaagacattggaggcgaact	UA251	UB48	UC4	1661947	1661096	1658580	NA, NA	mreC, mreD, S694, rplU, NA, rpmA	SAOUHSC_01761, SAOUHSC_01760	SAOUHSC_01759, SAOUHSC_01758, new_1659502_1659667_-1, SAOUHSC_01757, SAOUHSC_01756, SAOUHSC_01755
U863	1	1662019	995	M3	0.986013986013986	SigA	0.992007992007992	ctcagtcttcagccttaatcatgatatatcttaggaCTGATGCACGttcatttaaaaTAGCTTATAATTTTGTTATGatttaaaagcgtattaggaggttt	UA129	UB50	UC1	1662019	1662261	1662261	S695		new_1662023_1662302_1
U864	-1	1662708	455	M3	0.999000999000999	SigA	1	tcttgtagaagcgggttactttgatgaaaatgattgaagtTGATAGAATTaatgacgtatcTTGTGTATAATACCTACGAAgtactttcattggaggaaaa	UA93	UB1	UC1	1662708	1662354	1662354	NA		SAOUHSC_01762
U865	-1	1664156	1061	M3	0.999000999000999	SigA	0.999000999000999	aaatttaaatgaaaaagcggttcaattcttgaaaaatagtgtATATTTACATtttggtaataaCTAACTATAATTTACATAAGgaggttgtcatttggtag	UA86	UB5	UC5	1664156	1663952	1663952	NA		SAOUHSC_01764
U866	-1	1667386	1379	M2	1	SigB	1	acatcaattagaaaatattatcgttatggatgaaaaTGGTAAAatgaacgacaaagcGGGTAAATAtgaaggtatggaccgttttgattgtcgtaaacagc	UA12	UB7	UC3	1667386	1664394	1664394	folC		SAOUHSC_01766
U867	-1	1668491	80	M5	0.91008991008991	NM	0.957042957042957	agtatcttagctgaacgtgattaatagtaggctaagacgtgtttgagcgttaatcataatctagagtgcttgaagagatgaagcatttcaaatttcacgat	UA252	UB46	UC1	1668491	1668389	1668389	S697		new_1668346_1668491_-1
U868	1	1668665	253	M3	0.914085914085914	SigA	0.996003996003996	tctctttaaaataatttgaacttactcttcccaaaTCCTATATTAaactcttaactTATAGTATAATGATTGACAAaataagtcaatgtataggtgggaat	UA135	UB1	UC1	1668665	1669265	1669265	tag		SAOUHSC_01768
U869	-1	1668668	902	M3	0.998001998001998	SigA	1	ccaaatgcgcattcattcattttattcccacctatACATTGACTTattttgtcaatCATTATACTATAAGTTAAGAgtttaatataggatttgggaagagt	UA75	UB1	UC1	1668668	1664394	1664394	S698, S697, valS, folC		new_1668493_1668668_-1, new_1668346_1668491_-1, SAOUHSC_01767, SAOUHSC_01766
U870	-1	1670718	345	M1	0.545454545454545	NM	0.557442557442557	agtcgtattgtaaaataaatatacggacaaattgagAGCCTGAACtttgttcaggCTCTTTttaaatgtatataaggcatgggcggcgacttgatagtgaa	UA195	UB1	UC1	1670718	1668678	1664411	NA, NA, S700, S699	S698, S697, valS, folC	SAOUHSC_01770, SAOUHSC_01769, new_1669315_1669491_-1, new_1668670_1669313_-1	new_1668493_1668668_-1, new_1668346_1668491_-1, SAOUHSC_01767, SAOUHSC_01766
U871	1	1670744	1521	M1	1	NM	1	atcaagtcgccgcccatgccttatatacatttaaaaagaGCCTGAACaaagttcagGCTCTCaatttgtccgtatatttattttacaatacgacttaaagc	UA101	UB41	UC9	1670744	1670965	1670965
U872	-1	1673234	151	M3	0.501498501498502	SigA	0.999000999000999	taaagaaatgatagaacatcaacaaatcgatgcattaacaTTTTCAAGttcgtcggcagTACGTTATTATTTTAATGAAggatttgtaccaaaattcaagt	UA253	UB26	UC1	1673234	1669358	1669358	hemB, hemL, NA, NA, S700		SAOUHSC_01772, SAOUHSC_01771, SAOUHSC_01770, SAOUHSC_01769, new_1669315_1669491_-1
U873	-1	1676957	301	M4	0.95004995004995	SigA	1	aaaagtaaattagaaagattataatttatttaagcatcgtaCTTAATTGgattttaaatTATGTTATAATATTTGTATtgttagtatatatgggggcgttt	UA1	UB1	UC1	1676957	1670769	1670769	hemA, hemX, hemC, hemD, hemB, hemL		SAOUHSC_01776, SAOUHSC_01775, SAOUHSC_01774, SAOUHSC_01773, SAOUHSC_01772, SAOUHSC_01771
U874	-1	1677803	473	M3	0.988011988011988	SigA	1	gttataaaagtgaaaagctccaatcaaagttgacgctcaaaTAGTTTAACTttgatcggagcTTTTTTATAATGTATACCGAaaggttcaaatattatata	UA3	UB1	UC1	1677803	1670735	1669358	S702, engB, S701, hemA, hemX, hemC, hemD, hemB, hemL	NA, NA, S700	new_1677721_1677803_-1, SAOUHSC_01777, new_1676959_1677129_-1, SAOUHSC_01776, SAOUHSC_01775, SAOUHSC_01774, SAOUHSC_01773, SAOUHSC_01772, SAOUHSC_01771	SAOUHSC_01770, SAOUHSC_01769, new_1669315_1669491_-1
U875	-1	1682361	482	M3	0.719280719280719	SigA	1	gtcatctcttttttattttttaaatagcaaaatgccacattTAATCGCTAAaatatgacataTTTGCTAAAATGCATTTAAGagaacaaacattaaagtga	UA3	UB1	UC1	1682361	1677858	1677858	NA, NA, NA, tig, S703, clpX		SAOUHSC_01782, SAOUHSC_01781, SAOUHSC_01780, SAOUHSC_01779, new_1679137_1679286_-1, SAOUHSC_01778
U876	-1	1683655	674	M1	0.397602397602398	?	-1	cagttggcaggttaatcacattacacataactgtgtataaggaagagcgggTATTTtataCCTGCTCTtcctttttgcttggtgcaaatttcgtaaaaatt	UA3	UB1	UC1	1683655	1682363	1677858	S704, infC, rpmI, rplT	NA, NA, NA, tig, S703, clpX	new_1683609_1683655_-1, SAOUHSC_01786, SAOUHSC_01785, SAOUHSC_01784	SAOUHSC_01782, SAOUHSC_01781, SAOUHSC_01780, SAOUHSC_01779, new_1679137_1679286_-1, SAOUHSC_01778
U877	-1	1683774	650	M3	0.909090909090909	SigA	0.989010989010989	taaaaataattacagttataGTGTTGACTTaaatgtgaattGTTGATATGATTAATAACGTtgaatacgaaacgaaccaagtagaagcacccgcttctcac	UA3	UB1	UC1	1683774	1677909	1677858	S705, S704, infC, rpmI, rplT, NA, NA, NA, tig, S703, clpX		new_1683663_1683774_-1, new_1683609_1683655_-1, SAOUHSC_01786, SAOUHSC_01785, SAOUHSC_01784, SAOUHSC_01782, SAOUHSC_01781, SAOUHSC_01780, SAOUHSC_01779, new_1679137_1679286_-1, SAOUHSC_01778
U878	-1	1685384	1045	M2	0.999000999000999	SigB	0.999000999000999	aaggtatgtagccacttttttacttttaatatcactatgttctgtaaaaaaGGGTATGaaagtgaataaaggttatttatttcttggcctctaaaacatgg	UA137	UB10	UC5	1685384	1682720	1677858	lysP, S705, S704, infC, rpmI, rplT	NA, NA, NA, tig, S703, clpX	SAOUHSC_01787, new_1683663_1683774_-1, new_1683609_1683655_-1, SAOUHSC_01786, SAOUHSC_01785, SAOUHSC_01784	SAOUHSC_01782, SAOUHSC_01781, SAOUHSC_01780, SAOUHSC_01779, new_1679137_1679286_-1, SAOUHSC_01778
U879	-1	1685670	942	M3	1	SigA	1	aaacttttattgcgtatcaagttttacaGGGTTGATTAtgcgtgatgaaTCCTGTATATTACAAGTTAGttaaaatattaaattgagttagaggttgcatg	UA103	UB38	UC1	1685670	1682465	1677858	S706, lysP, S705, S704, infC, rpmI, rplT	NA, NA, NA, tig, S703, clpX	new_1685441_1685670_-1, SAOUHSC_01787, new_1683663_1683774_-1, new_1683609_1683655_-1, SAOUHSC_01786, SAOUHSC_01785, SAOUHSC_01784	SAOUHSC_01782, SAOUHSC_01781, SAOUHSC_01780, SAOUHSC_01779, new_1679137_1679286_-1, SAOUHSC_01778
U880	-1	1688084	585	M3	1	SigA	1	ccatactttttatcaggagaaaatttcagaaaCAATTGAATTttaaaatgatTGGTGTATAATGAATACAAAtctaaatcgtttaaatgattgaagacaag	UA3	UB1	UC1	1688084	1683672	1677858	S709, NA, S708, thrS, S707, S706, lysP, S705	S704, infC, rpmI, rplT, NA, NA, NA, tig, S703, clpX	new_1688014_1688084_-1, SAOUHSC_01789, new_1687694_1687846_-1, SAOUHSC_01788, new_1685672_1685755_-1, new_1685441_1685670_-1, SAOUHSC_01787, new_1683663_1683774_-1	new_1683609_1683655_-1, SAOUHSC_01786, SAOUHSC_01785, SAOUHSC_01784, SAOUHSC_01782, SAOUHSC_01781, SAOUHSC_01780, SAOUHSC_01779, new_1679137_1679286_-1, SAOUHSC_01778
U881	-1	1690940	283	M3	0.991008991008991	SigA	0.999000999000999	tattgtttcattatttggttaaatgaattaaattgagggaTTCTTTTTTCatctctagattTATAGTATAATTAGGCATAAtcaaaataaagagggtgatg	UA99	UB1	UC1	1690940	1685678	1677858	nrdR, dnaB, dnaI, S709, NA, S708, thrS, S707	S706, lysP, S705, S704, infC, rpmI, rplT, NA, NA, NA, tig, S703, clpX	SAOUHSC_01793, SAOUHSC_01792, SAOUHSC_01791, new_1688014_1688084_-1, SAOUHSC_01789, new_1687694_1687846_-1, SAOUHSC_01788, new_1685672_1685755_-1	new_1685441_1685670_-1, SAOUHSC_01787, new_1683663_1683774_-1, new_1683609_1683655_-1, SAOUHSC_01786, SAOUHSC_01785, SAOUHSC_01784, SAOUHSC_01782, SAOUHSC_01781, SAOUHSC_01780, SAOUHSC_01779, new_1679137_1679286_-1, SAOUHSC_01778
U882	1	1692162	1121	M4	0.951048951048951	SigA	0.994005994005994	ccataccattaattgcaatattcgttgacattaaaaGCACCCCttgatctttaTGTGTTATACTTTATGGAAttagtatagcatattatatgaaatttgaa	UA254	UB73	UC4	-1	-1	-1
U883	-1	1692188	1288	M4	0.829170829170829	SigA	1	atgactattttttataaaaaagataaataaatcaacggaaaacgcTTTCAAATttcatataaTATGCTATACTAATTCCATaaagtataacacataaagat	UA36	UB3	UC3	1692188	1690948	1687888	gapB	nrdR, dnaB, dnaI, S709, NA	SAOUHSC_01794	SAOUHSC_01793, SAOUHSC_01792, SAOUHSC_01791, new_1688014_1688084_-1, SAOUHSC_01789
U884	-1	1696495	134	M4	0.993006993006993	SigA	1	gtcgtgtataaatactctatgagatagtttctttaaTTACGACATcacagtcgaaTATGCTAAAATATATATAAattagttctggaggttaaaattgtgaa	UA114	UB26	UC1	1696495	1692308	1692308	polA, fpg, coaE		SAOUHSC_01797, SAOUHSC_01796, SAOUHSC_01795
U885	-1	1698551	986	M3	0.809190809190809	SigA	1	tttgtatatgtcgatttgtaagttataagtaatagaTTGTTGTGAAtcaagcaatttTATAATATATTTATTATAATaaagaaattttagtaacgcgcttg	UA55	UB33	UC1	1698551	1696728	1696728	S710, NA		new_1698241_1698547_-1, SAOUHSC_01798
U886	-1	1701138	1190	M3	0.924075924075924	SigA	0.99000999000999	atgtaaaaaatgtgtaaagataatgtgtagGATGTTATTtttataaatagtTCGGTTATAATGTAAATATAattataagttagggaggcataccatgtcgc	UA224	UB6	UC4	1701138	1698768	1698768	phoP, phoR		SAOUHSC_01800, SAOUHSC_01799
U887	-1	1703987	1355	M3	0.94005994005994	SigA	1	caaaaaaattgttgcacatataatgccagtttttaTATTTCACAAacgaaatgcgtTTAGCTATAATATTAGTTGAaagccatttcataaagaaacagtaa	UA220	UB28	UC3	1703987	1698785	1698785	S712, citZ, citC, S711, phoP, phoR		new_1703669_1703987_-1, SAOUHSC_01802, SAOUHSC_01801, new_1701140_1701460_-1, SAOUHSC_01800, SAOUHSC_01799
U888	1	1704241	814	M3	1	SigA	1	tatattaacatggaattttacacatttttaccgaaaaTAATTGTATAtatctcaatatAAGTGCATAATAAACATATCtatatttaagggagatgtattat	UA3	UB1	UC1	1704241	1705696	1705696	aapA		SAOUHSC_01803
U889	-1	1705432	1188	M3	0.983016983016983	SigA	0.99000999000999	agtagcccatatatttgccacctaatagtttgtacgtagcattTTTATGTAGAtctgggtttttACGACTATAATTGATATATGcaatgataatcagaccc	UA224	UB6	UC4	-1	-1	-1
U890	-1	1710760	479	M3	0.861138861138861	SigA	0.998001998001998	atttaaaacgtttacatcaattcaatacattagtttTGATGGAATGacatatcaattTGTGGTAATTTAGAGTTAAAgataaatcagttatagaaaggtat	UA3	UB1	UC1	1710760	1707965	1707965	S714, pfkA, pykA		new_1710669_1710760_-1, SAOUHSC_01807, SAOUHSC_01806
U891	1	1714295	1462	M2	0.981018981018981	SigB	0.981018981018981	ttttaaaaaataacttggataaaacgcattaCATTATAaaagtaaaaatattGGGTAAATCtgaatgagtaagaatttatggttttgattatgtaacacaa	UA27	UB7	UC3	1714295	1714434	1714434
U892	-1	1714629	658	M3	0.785214785214785	SigA	1	tcctttaaccctagtgatattaggcttatataacTTTTATCaactaataaatTATGATATAGTAAACTGATGgttagatattttttaaccatcagtttgcg	UA3	UB1	UC1	1714629	1707982	1707982	S718, NA, S717, accD, accA, S716, S715, S714, pfkA, pykA		new_1714208_1714629_-1, SAOUHSC_01810, new_1712784_1712977_-1, SAOUHSC_01809, SAOUHSC_01808, new_1710876_1710981_-1, new_1710762_1710874_-1, new_1710669_1710760_-1, SAOUHSC_01807, SAOUHSC_01806
U893	-1	1720423	317	M3	0.952047952047952	SigA	1	caaaaaataaaataggtgaaacgatcattatttcatttcactTCAATGCTTTttatccaaaatAAAGTTATAATGTAGTTAATactgttcgaaaagaagag	UA1	UB1	UC1	1720423	1710923	1710906	NA, S719, NA, dnaE, S718, NA, S717, accD, accA, S716		SAOUHSC_01813, new_1718817_1719076_-1, SAOUHSC_01812, SAOUHSC_01811, new_1714208_1714629_-1, SAOUHSC_01810, new_1712784_1712977_-1, SAOUHSC_01809, SAOUHSC_01808, new_1710876_1710981_-1
U894	1	1720540	998	M3	0.965034965034965	SigA	1	tttgaaaatatacaacaaacacaaagatcacaaaatctttaattttAAATGGAAAAatccattattaTTTATTAGAATGTAAGTGAGgagggatgtactaa	UA225	UB17	UC1	1720540	1720979	1720979	NA		SAOUHSC_01814
U895	-1	1722044	1397	M2	0.747252747252747	SigB	0.747252747252747	ttcaaaatcgagctaatacattaactagattttcaatttttaaaatttgagaatttgttataattaagtggcaaaaGGGTACTaaatttatatagtaattg	UA12	UB7	UC3	1722044	1721242	1721242	NA		SAOUHSC_01815
U896	1	1722121	536	M3	0.998001998001998	SigA	1	tttaaaaattgaaaatctagttaatgtattagctcgATTTTGAAATctaataataatTGGCATAAAATGGAAGTAATattatgttgaggagtgtttataaa	UA3	UB1	UC1	1722121	1723325	1723325	pepQ, S720		SAOUHSC_01816, new_1723218_1723365_1
U897	-1	1724675	1281	M3	0.508491508491508	SigA	1	cagtgtaataacctttacaattttgtggatttttgATTGCGCTttcaaaatgttCGCGTTAAGATGATTATGGAggtggatggtatgaaaattggtatacc	UA36	UB3	UC3	1724675	1723469	1723469	ald2		SAOUHSC_01818
U898	1	1724744	1460	M4	0.873126873126873	SigA	0.988011988011988	cattttgaaagcgcaatcaaaaatccacaaaattgtaaaggttattacaCTGACTTttccgaaaatTGTGGTAAAATATAATTAAgaaagaacaaggaggc	UA27	UB7	UC3	1724744	1725314	1725314	NA		SAOUHSC_01819
U899	-1	1726801	857	M3	0.895104895104895	SigA	0.995004995004995	tcagtggatggacacaaatcgtcctaaaaaataatctgtaataGTATAGTCATaaaactgtatgAATGATAAAATGAAAAATGAaatagtataaaaagcaa	UA3	UB1	UC1	1726801	1725560	1725560	ackA		SAOUHSC_01820
U900	-1	1728434	450	M3	0.639360639360639	SigA	0.998001998001998	tataaaattaaatttgcttttgattaaagcatgaAAATTGTAATcaaaccataaatTGTCGTATGATGTAGTTAGAattttaaaatgcaggaggtcaagta	UA93	UB1	UC1	1728434	1725560	1725560	tpx, S722, NA, ackA		SAOUHSC_01822, new_1727776_1727897_-1, SAOUHSC_01821, SAOUHSC_01820
U901	-1	1731717	640	M3	0.772227772227772	SigA	0.986013986013986	tagaaataagattattttgcgctataACCTTTATTTtttgtcggatAATAGTATAATGCTTGAGTAaaacaattttaacgattgatgattaatgaaagaga	UA3	UB1	UC1	1731717	1725560	1725560	NA, thiI, NA, tpx, S722, NA, ackA		SAOUHSC_01825, SAOUHSC_01824, SAOUHSC_01823, SAOUHSC_01822, new_1727776_1727897_-1, SAOUHSC_01821, SAOUHSC_01820
U902	-1	1733773	332	M3	0.805194805194805	SigA	1	gtatagaatttcgaaaatattatggcaataaattcattttaTAATTTATCCttaagcaaaatTACGTTATAATAGTAATGATaaattaggaggagaagcat	UA1	UB1	UC1	1733773	1731935	1731935	ezrA, S723		SAOUHSC_01827, new_1731960_1732037_-1
U903	1	1733829	790	M3	1	SigA	1	gtaattttgcttaaggataaattataaaatgaatTTATTGCCATaatattttcgaAATTCTATACTATTATAAAAtctatgaaaataagaggttttaaata	UA3	UB1	UC1	1733829	1735174	1735174	NA, S724, rpsD		SAOUHSC_01828, new_1734377_1734576_1, SAOUHSC_01829
U904	1	1734377	774	M3	0.657342657342657	SigA	0.999000999000999	aaaagcaactcgcataaaaggacatcagcattttcaataaaGTGTTGACAGttagcaggaaAATGTTACAATAATCTTTGTgtgaattaacgaaagtagca	UA3	UB1	UC1	1734377	1735174	1735174	S724, rpsD		new_1734377_1734576_1, SAOUHSC_01829
U905	1	1736170	152	M4	0.759240759240759	SigA	0.996003996003996	aattcatctttcagtttattcagagtcattgataagtCACCTTtctgttaaacTTTGATAAACTATTCTAAAattaaactatcacaattatattggaggtt	UA253	UB26	UC1	1736170	1736653	1736653	NA		SAOUHSC_01831
U906	-1	1736194	1196	M4	0.79020979020979	SigA	0.994005994005994	gccaagaagtttggactttaaagtcatgttgatgcaattgcTTTAACCTccaatataatTGTGATAGTTTAATTTTAGaatagtttatcaaagtttaacag	UA177	UB6	UC4	1736194	1736032	1736032	NA		SAOUHSC_01830
U907	1	1736739	1078	M4	0.573426573426573	SigA	0.997002997002997	aacgtttgttcgacaatatagcgttatcacttttttaggcTTTTAAAttttcagaaaaTTTGCTAAAATAGTGAAATCttatttataggaggcatataaat	UA6	UB5	UC5	1736739	1739526	1739526	NA, serA		SAOUHSC_01832, SAOUHSC_01833
U908	-1	1740845	1091	M3	0.714285714285714	SigA	0.994005994005994	gctaaagcgcaaatctaacttcaatagGGTTTGCGCTttttttagtcaAATAGTAGAATGATTTATATctgaattttcagaaatggagtggggattgtgaa	UA6	UB5	UC5	1740845	1739602	1739602	NA, S725		SAOUHSC_01835, new_1739565_1739678_-1
U909	-1	1743171	641	M3	0.552447552447552	SigA	1	atacactatacaactttagatgtattttcagactATCTTGTTCTagtaaaaatatAGTGATAAAATCTAGTTGTTataaacaaataagttaagtaggtggc	UA3	UB1	UC1	1743171	1740928	1740928	NA, S726, ptaA		SAOUHSC_01837, new_1742383_1742509_-1, SAOUHSC_01836
U910	1	1743262	549	M3	0.998001998001998	SigA	0.999000999000999	tgaaaatacatctaaagttgtatagtgtatTACTAGCAATaattataaaaaAAAGACATAATTAAAGCATAtataaatcatataatggaggttaagtatgt	UA3	UB1	UC1	1743262	1744575	1744575	NA		SAOUHSC_01838
U911	1	1746037	1520	M1	0.997002997002997	NM	0.999000999000999	actttaaagttttttgaacgtaaaaaaaacccttacaacaaatatgtaagggCgcgattgcacgttaCcaccaaacttaaacataatcataagataatgtt	UA101	UB41	UC9	1746037	1746190	1746190
U912	-1	1746248	586	M3	1	SigA	1	ttaacctcctaaattacgtatagtataccatatttaagcAATTTGACTTttattttaacgTTAATTATAATTAGGGAAAAtgcataaagaataggataaaa	UA3	UB1	UC1	1746248	1744668	1744668	S728, S727, tyrS		new_1746002_1746249_-1, new_1745930_1746000_-1, SAOUHSC_01839
U913	1	1746274	568	M4	0.736263736263736	SigA	1	cctattctttatgcattttccctaattataattaacgttaaaataaaagtcaaattgcttaaaTATGGTATACTATACGTAAtttaggaggttaaagatga	UA3	UB1	UC1	1746274	1747244	1747244	sgtA		SAOUHSC_01840
U914	-1	1750166	199	M3	0.917082917082917	SigA	0.996003996003996	ttaaaaaaaattaataaaatAGGTTGCAATatttaattgggaTGCGCTACAATTAACACTAAtaattgatattgataattattatcaattaaatataatct	UA25	UB14	UC1	1750166	1747337	1747337	isdH		SAOUHSC_01843
U915	-1	1752189	1159	M3	0.967032967032967	SigA	1	tttattgcaaaaatgaaagcgctaacccgattTAGTCGACAAgtttttaacagTTCGTTATTATATGAATGTAagtaaaaatttcttagctacaacttaca	UA255	UB53	UC4	1752189	1750414	1750414	S729, fhs		new_1752108_1752189_-1, SAOUHSC_01845
U916	-1	1754302	1296	M3	1	SigA	1	aataattaatactagaaaaaggataaaagtaaaaATTTTGAATAattagaaatgTTATGTATAATATTGAGAAAgaaagcgttttcacataacaaaggggg	UA36	UB3	UC3	1754302	1752199	1750414	acsA, S730	S729, fhs	SAOUHSC_01846, new_1752191_1752546_-1	new_1752108_1752189_-1, SAOUHSC_01845
U917	1	1754367	1313	M3	0.993006993006993	SigA	0.999000999000999	aacatttctaattattcaaaatttttacttttatcctttttcTAGTATTAATtattgtaaattTTCTATATAATGAATTTAATacaatcacgacgtcgatt	UA4	UB3	UC3	1754367	1756254	1756254	acuA, acuC		SAOUHSC_01847, SAOUHSC_01849
U918	-1	1757397	491	M4	0.863136863136863	SigA	0.991008991008991	caagcttttcgctaaatttttccaaacaaaaataTGTTACTGtaaattaaaaTATGGTAAACTATGAAAATgaaatgaaaacatgttattataatgaataa	UA3	UB1	UC1	1757397	1756330	1756330	ccpA		SAOUHSC_01850
U919	-1	1757530	1171	M3	0.996003996003996	SigA	0.999000999000999	aaatgtgaacatttttcaacaaatgcaattgaTATTTGAAAAggctttctcaaAACATTACAATTAAAAATGAaaaaagtttatataaaattaaaatatat	UA121	UB6	UC4	1757530	1757384	1756347	NA	ccpA	SAOUHSC_01851	SAOUHSC_01850
U920	-1	1759271	696	M3	1	SigA	1	aaagacaaaggttgttaatttttattaagcgttAGGTTGAATGtatgagaattttAGATTTATAATAGAAGATAGaaacgaaaatttttcttaaaagcagt	UA3	UB1	UC1	1759271	1757826	1757826	S732, aroA		new_1758967_1759271_-1, SAOUHSC_01852
U921	1	1759603	1497	M1	0.999000999000999	NM	0.999000999000999	ataaactgatgatatcaaaaaaggtaagcacctgaatGCCTACCTtttattttgAAATTCaatttttaaaaatatattacatagcttactgctatgattga	UA90	UB23	UC9	1759603	1759841	1759841
U922	-1	1761209	1439	M2	0.989010989010989	SigB	0.989010989010989	agtagataaataattaataattaaacaaatgcacttaaatgaggTTGTTACTtatttaagtgcattTGTTATAGGaggatatacaaatgacgcagcaacaa	UA12	UB7	UC3	1761209	1759611	1759611	NA		SAOUHSC_01854
U923	-1	1761799	1368	M2	1	SigB	1	catatttagataaattaggcatgaaaaatgcgttttaatATGTTTATaatagagtagtatGGGTATTTAttattaatgacattattacatgttaattagga	UA76	UB7	UC3	1761799	1759611	1759611	NA, NA		SAOUHSC_01855, SAOUHSC_01854
U924	-1	1767943	1334	M2	0.988011988011988	SigB	0.988011988011988	actgatgaagtaaaaggtaatatttttTATTTTAttaactcaaatgacGGGTATGATgcaagtaggatactaaatactgcatttttaaatgaaattgaggc	UA13	UB8	UC3	1767943	1759628	1759611	NA, NA, murC, NA, NA		SAOUHSC_01858, SAOUHSC_01857, SAOUHSC_01856, SAOUHSC_01855, SAOUHSC_01854
U925	-1	1768525	635	M3	0.655344655344655	SigA	0.994005994005994	tttagactagagaaaaacggggtaatactcgtttttCTCTGTTACTatgtgttgattTATTGTAAACTATTATAAGGtgcgaaattaggagtgttacatat	UA3	UB1	UC1	1768525	1759645	1759628	NA, NA, NA, murC, NA, NA		SAOUHSC_01859, SAOUHSC_01858, SAOUHSC_01857, SAOUHSC_01856, SAOUHSC_01855, SAOUHSC_01854
U926	-1	1770070	1337	M4	0.693306693306693	SigA	0.997002997002997	agtcatcatttatgctcccttgatttcaaattcatatcatTAGTTTAccatattgaaGATGATATAATAACTTATAaggagtgagaacttttatgaacata	UA148	UB8	UC3	1770070	1761226	1759611	NA, NA, NA, NA, NA, murC, NA	NA	SAOUHSC_01861, SAOUHSC_01860, SAOUHSC_01859, SAOUHSC_01858, SAOUHSC_01857, SAOUHSC_01856, SAOUHSC_01855	SAOUHSC_01854
U927	1	1770077	899	M4	0.822177822177822	SigA	0.999000999000999	ttacttttttatttatgttcataaaagttctcactccttataagtTATTATATcatcttcaaTATGGTAAACTAATGATATgaatttgaaatcaagggagc	UA75	UB1	UC1	1770077	1770466	1770466	NA		SAOUHSC_01863
U928	-1	1771463	1214	M4	0.653346653346653	SigA	0.999000999000999	aagtagttagaagtgtattagtgtggggcgtttcgtttttgttcgcatttatgaatAGTGATATGATGTAATAAAcacatgctaattgtaataacgaatac	UA179	UB6	UC4	1771463	1770542	1770542	NA		SAOUHSC_01864
U929	-1	1773806	943	M4	0.894105894105894	SigA	1	ttcatcatatttttagattaaattacttaaatttatCAACTTTCgtaagtgaatTATGTTATAATTTAAAACGaagcttaaaagtgttgtttagaaaacac	UA103	UB38	UC1	1773806	1771885	1771885	S736, S735, NA, trmB		new_1773372_1773806_-1, new_1773258_1773370_-1, SAOUHSC_01866, SAOUHSC_01865
U930	-1	1776183	537	M3	1	SigA	1	atagcatcgttttgttcctttttattattttctgacatcTTATTGTAGTttttatatctttTCATGTAAAATAGAATTTAActtatagaaaaaaggaagtc	UA3	UB1	UC1	1776183	1771885	1771885	NA, dat, S736, S735, NA, trmB		SAOUHSC_01868, SAOUHSC_01867, new_1773372_1773806_-1, new_1773258_1773370_-1, SAOUHSC_01866, SAOUHSC_01865
U931	-1	1777543	1021	M2	0.995004995004995	SigB	0.995004995004995	atgaaggaaaatatcatcaagttaaacgaATGTTTCAtagcattcaaaatgAGGTATTACatttaagacgtatcaaaattgctgatttagaattggacagc	UA125	UB10	UC5	1777543	1776288	1776288	NA, S737		SAOUHSC_01869, new_1776262_1776997_-1
U932	-1	1779994	299	M3	0.688311688311688	SigA	0.999000999000999	atgtgtatgataagaatgatttttctactgttatgcgatgttcatctcaaatAGTAGTATAATGTTTATATGaaatttcgtaatattctaatcaaaatcta	UA1	UB1	UC1	1779994	1776305	1776305	S738, NA, NA, NA, S737		new_1779791_1779994_-1, SAOUHSC_01871, SAOUHSC_01870, SAOUHSC_01869, new_1776262_1776997_-1
U933	-1	1780088	918	M3	0.993006993006993	SigA	0.994005994005994	gtacttttttaaactttgctatatctcttgtgttatGAGATGACAAttatgttgaatATATTTATAATGTGAACTTCataaaaaatgaagatgtatgtgta	UA123	UB1	UC1	1780088	1777546	1776305	S739, S738, NA, NA	NA, S737	new_1779996_1780079_-1, new_1779791_1779994_-1, SAOUHSC_01871, SAOUHSC_01870	SAOUHSC_01869, new_1776262_1776997_-1
U934	1	1780144	783	M3	0.984015984015984	SigA	0.999000999000999	ataaatatattcaacataattgtcatctcataacacaagagATATAGCAAAgtttaaaaaagTACTATAAAATAGCAATTGAatgtccagtaacaaatttg	UA3	UB1	UC1	1780144	1781448	1781448	NA		SAOUHSC_01872
U935	-1	1780844	1238	M1	0.88011988011988	NM	0.919080919080919	taacatatccatttgatgactgatgcgttttttaccatttttcttaagTActgacaattcaacatCttttaaacttaaaccttttagacgattggatttga	UA156	UB52	UC2	-1	-1	-1
U936	-1	1791469	657	M3	0.99000999000999	SigA	0.999000999000999	tgcataatgagtaaatagaattaacgttataGACTTGAAATaaatgtcgttaTAACATAATATTAATTTGTAtaatttaatttcgtttggagcttttctac	UA3	UB1	UC1	1791469	1788494	1788494	S740, leuS, NA		new_1791236_1791469_-1, SAOUHSC_01875, SAOUHSC_01874
U937	-1	1792753	795	M4	0.759240759240759	SigA	0.999000999000999	atgtcattttcctttctataaaaaaagagttctaagtaCAGATTTtaacatattttAATGTTATAGTGTTTATTAtagtttgacaaaaaagagagaggaac	UA3	UB1	UC1	1792753	1791044	1788494	NA, S740, leuS	NA	SAOUHSC_01876, new_1791236_1791469_-1, SAOUHSC_01875	SAOUHSC_01874
U938	1	1792762	726	M4	0.79020979020979	SigA	1	catatttcatagttcctctctcttttttgtcaaactataataAACACTATaacattaaaaTATGTTAAAATCTGTACTTagaactctttttttatagaaag	UA3	UB1	UC1	1792762	1794385	1794385	NA, NA, S741		SAOUHSC_01877, SAOUHSC_01878, new_1794328_1794421_1
U939	-1	1795122	991	M3	0.768231768231768	SigA	0.998001998001998	aatgcgtatcttttttgaagaaatatatgtagaaTTGTTGCAATttaatggtaatATTGATATATTTTCTTTGTAtataaattataaaattaatatgtaat	UA256	UB33	UC1	1795122	1794444	1794444	S742, rot		new_1794849_1795124_-1, SAOUHSC_01879
U940	-1	1797300	352	M4	0.672327672327672	SigA	1	ttatatataataatatggacaacaataatactataaaTAGAAATctacatagtgaaTTTGCTATAATTATGTTATtgaagattaatgaaaaaggggcagta	UA209	UB1	UC1	1797300	1796365	1796365	NA		SAOUHSC_01882
U941	1	1797461	1298	M4	0.598401598401598	SigA	1	tttttgattgtttttgatgaaaacgcTTTCTCGaatatttttttCATGCTAAACTTATTGTAAacacaagggtttggaggagtagcaatggcactattaaa	UA36	UB3	UC3	1797461	1798482	1798482	putA		SAOUHSC_01884
U942	-1	1802286	983	M3	0.983016983016983	SigA	0.998001998001998	tatagtactcagattatattaaattaaaaccgtcatTAATTGTTTTttcagaaaacaTATAGTATCATTTTAAATGTagttgacatactacgtactcaaat	UA257	UB33	UC1	1802286	1796450	1796450	S743, ribD, ribB, ribA, ribH, NA, NA		new_1801924_1802286_-1, SAOUHSC_01889, SAOUHSC_01888, SAOUHSC_01887, SAOUHSC_01886, SAOUHSC_01883, SAOUHSC_01882
U943	1	1803599	930	M3	0.976023976023976	SigA	1	taataagttaaattcgtttcatcgatattagAATTTGTATAaatctcttgaacTTTATTATAATTAGTTGATAtatttggatattttttcgtgaacataga	UA49	UB29	UC1	1803599	1804194	1804194	S744		new_1803599_1804239_1
U944	-1	1804229	1023	M2	0.999000999000999	SigB	0.999000999000999	ggtgattagccatatcttgagtgtatggccaatcaccttagTTGAATTTattttgtaatcaaGGGTATTGAttaagaagctttgtttttacgactaaaaat	UA125	UB10	UC5	1804229	1802417	1802417	NA		SAOUHSC_01890
U945	1	1804432	655	M3	0.647352647352647	SigA	0.995004995004995	aatttaaattacatagtcatatcgtgtaatataccaaaggaACATAGACATtcatctatataGATGATAATCTATTTAACGTctaggaggtatgttatgac	UA3	UB1	UC1	1804432	1806676	1806676	arsR, arsB, arsC, S745		SAOUHSC_01891, SAOUHSC_01893, SAOUHSC_01894, new_1806488_1806705_1
U946	-1	1807704	756	M3	0.91008991008991	SigA	0.995004995004995	tacattactgtttatttatgaatatgtaacaatgcatagataAAATTGTTAAacggttttaatAATGTTAAACTTTATTATCGtagtcaaactgaatgtat	UA3	UB1	UC1	1807704	1806752	1806752	S747, NA		new_1807637_1807704_-1, SAOUHSC_01895
U947	-1	1808227	309	M3	0.816183816183816	SigA	0.891108891108891	ttagaataaaatatttagaaaaatcattCATTTGCGTAatcgctaaattAAGTGTTAAATATAAGACATaagtaattaatttaatgtgatatgatgtatta	UA1	UB1	UC1	1808227	1806752	1806752	S749, NA, S748, S747, NA		new_1808137_1808227_-1, SAOUHSC_01896, new_1807706_1807911_-1, new_1807637_1807704_-1, SAOUHSC_01895
U948	1	1808408	1256	M3	0.992007992007992	SigA	1	acgtatacaacaaacaccagaaaatcatacactATCTTTTAAAaaaatataataTTAGCTATAATTATGATGAGtattatcaactactcttgataaaaatg	UA258	UB54	UC3	1808408	1810620	1810620	S751, NA, S753, NA		new_1808806_1808917_1, SAOUHSC_01898, new_1809362_1810086_1, SAOUHSC_01900
U949	-1	1809870	613	M3	0.999000999000999	SigA	1	aaatcaccataaatgaaattgtaatatggatttTTGTAGATTTgatacatatatTTCTGTAAAATATATAAAATacactttcaattgacgctaatgtttaa	UA3	UB1	UC1	1809870	1807721	1806752	S754, NA, S752, S750, S749, NA, S748	S747, NA	new_1809792_1809863_-1, SAOUHSC_01899, new_1809191_1809347_-1, new_1808229_1809189_-1, new_1808137_1808227_-1, SAOUHSC_01896, new_1807706_1807911_-1	new_1807637_1807704_-1, SAOUHSC_01895
U950	-1	1811974	360	M3	0.521478521478521	SigA	0.876123876123876	tttaaaaaatataggcaaaaaattagctatatattataaaagcgtgatatAAATGTTTTATAtaacaaagaaataaaaatcattttttacaaatggttgta	UA259	UB1	UC1	1811974	1811240	1811240	S755, tal		new_1811876_1811974_-1, SAOUHSC_01901
U951	1	1812097	598	M4	0.927072927072927	SigA	0.999000999000999	tgactttagcaaacattgtgtctacaagttaataaaactaTTGTTttatgattgttTATGATACGATATGTAAATgataatcatccaggaggtctagcatg	UA3	UB1	UC1	1812097	1813306	1813306	NA, S756, S757, crcB1, crcB2		SAOUHSC_01902, new_1812438_1812618_1, new_1812620_1812692_1, SAOUHSC_01903, SAOUHSC_01904
U952	-1	1816368	150	M4	0.975024975024975	SigA	0.998001998001998	agaattttagtggttgattgctctaagtgttttttctCATGTATTcaactcagaTTTGTTATGATAACAGGGTataatacatcaaaaaggtgaggcgatat	UA253	UB26	UC1	1816368	1815439	1815439	NA		SAOUHSC_01907
U953	-1	1817486	732	M3	0.994005994005994	SigA	1	ataaaagattttcggtatataaatgataatatGTATCGAAAAtctttagctttTCTATTATAATTAAAGTTATtcatatattaaaaaggagcgttgttgtg	UA3	UB1	UC1	1817486	1816544	1816544	NA		SAOUHSC_01908
U954	-1	1819008	875	M3	1	SigA	1	cataattaatctacaatattttactgtaaatttatttgtgaaAAATTGACATtaattcattaaTTAGGTACTATTATTTTTAAcggattctcttatcctga	UA75	UB1	UC1	1819008	1816578	1816544	S758, metK, NA		new_1818830_1819009_-1, SAOUHSC_01909, SAOUHSC_01908
U955	1	1819072	1301	M4	0.566433566433566	SigA	1	aattaatgtcaatttttcacaaataaatttacagtaaaatattgTAGATTAattatgttaaTGTGTTATACTAATTAAATGtaaaggcttacatttaaatt	UA36	UB3	UC3	1819072	1820735	1820735	pckA		SAOUHSC_01910
U956	1	1822973	894	M4	0.973026973026973	SigA	0.998001998001998	taacttgacgattatctttatccctaaacttcacgcgCATCACATCcctacattgTATGTTAATATAATAGTTAattactatcgttggaggcattaattat	UA75	UB1	UC1	1822973	1823268	1823268	NA		SAOUHSC_01914
U957	-1	1825792	560	M3	0.656343656343656	SigA	0.997002997002997	tgcatcaattcgtctacttttttatatttttaaacataaCCACTGCTAGaatgtcataaaATCGTTATAATTATAATGTAaatgattttggaggaataacg	UA3	UB1	UC1	1825792	1821559	1821559	menE, menC, S759, NA, NA		SAOUHSC_01916, SAOUHSC_01915, new_1822947_1823265_-1, SAOUHSC_01913, SAOUHSC_01912
U958	-1	1826421	355	M4	0.921078921078921	SigA	0.999000999000999	caaaatgacacgaacatgacaacataatttaacaaaataataatttctaTTTGCTATAATATATTGTAtttatttttagaggtgttgcttttgaaaaagtt	UA259	UB1	UC1	1826421	1826370	1826370
U959	1	1826578	1286	M4	0.578421578421578	SigA	1	ttctacaatccaaaaatatttttaaagttttgaaaaaaattaAAGTATTtccactactaaTTTGGTAAAATATGATTATGtgatatagtgaaagcgtttta	UA36	UB3	UC3	1826578	1828385	1828385	S760, NA, S761, NA		new_1826578_1826666_1, SAOUHSC_01918, new_1827318_1827397_1, SAOUHSC_01919
U960	-1	1831062	358	M3	0.991008991008991	SigA	1	ttttcaggatcgttagattagattCGGTTGTATAgtataatgaaaAATATTATAATAAATTTATAaaaaaggtattttattttgaaatcatgtcccttcgt	UA259	UB1	UC1	1831062	1830331	1830331	NA		SAOUHSC_01923
U961	1	1832754	1476	M4	0.947052947052947	SigA	0.998001998001998	gaatcatataacttatcagaagcaagtgaCTGTGCTTGtatatttgccGATGATATAATAGTAGAGTcgcctatctctcaggcgtcaatttagacgcagag	UA260	UB7	UC3	1832754	1832958	1832958	S764		new_1832754_1832965_1
U962	1	1836311	424	M3	0.694305694305694	SigA	0.999000999000999	agtatgtttacttatgctaccatcttttctccatactaaaCTATTTATAAaagaatatatCATGTTATAATTGTTTTTAAactgtggaaatacttcaaata	UA78	UB1	UC1	-1	-1	-1
U963	1	1847323	425	M4	0.638361638361638	SigA	0.994005994005994	ggcaattgaatgaggctgattagaaatattttcagcaaaaccaagaGATGTTAAAATAGTTAAAGcagttaaacctttaaccattacatttttattcatat	UA78	UB1	UC1	-1	-1	-1
U964	-1	1847416	1115	M3	0.994005994005994	SigA	0.995004995004995	aaaacgttaataagtggttaattaatattTAATTAATATttttatttaaaATGTATATAGTAAATGTGTAtctagatacattaactataaaaataaatttg	UA261	UB30	UC4	1847416	1845716	1845716	splA, S768, splB		SAOUHSC_01942, new_1846530_1846653_-1, SAOUHSC_01941
U965	1	1848275	1113	M3	0.972027972027972	SigA	0.999000999000999	agttaatagatagttaatacatttttgatatttagtTAATTGTTCTtttaaaaaattATTATTATATTTTCATTGTAaacgtttacaatataaaaaaagga	UA262	UB30	UC4	1848275	1848343	1848343
U966	-1	1851801	1419	M2	1	SigB	1	ctgcgcccggaggatcatttgcttatttaaatcaattcggtGTGGATAAatggatgaatgaaGGGTATATGcataaggagaacattttaactactgccaat	UA12	UB7	UC3	1851801	1849150	1849150	epiF, epiE, epiG, S770, S769		SAOUHSC_01948, SAOUHSC_01947, SAOUHSC_01945, new_1849240_1849364_-1, new_1849103_1849238_-1
U967	-1	1860965	1116	M3	1	SigA	1	cattttattttttaatgaacagtTAATTTTATAaataagtgaaaTAATCTAGAATAAATTTGTAttaaaaatttatatagaaagaaagtgaaacttatgtt	UA261	UB30	UC4	-1	-1	-1
U968	1	1861481	1503	M1	0.841158841158841	NM	0.843156843156843	actttaaaaataaaaaaccatgatttcgaagtcttcataaactgaagcttCtactctcatggcaatttatactatgatattcaattataatgcctagtctc	UA263	UB41	UC9	1861481	1861552	1861552
U969	-1	1861610	954	M3	0.95004995004995	SigA	1	tttaaagatgtagctcatcaacattttcataggggatttttaaaattaaGTATTGAAAAataaaatattTATATTATAATATAAATAAGtcaacgaccatg	UA264	UB38	UC1	1861610	1861458	1861458	S771		new_1861466_1861610_-1
U970	1	1861682	1193	M3	0.685314685314685	SigA	0.988011988011988	ttaattttaaaaatcccctatgaaaatgttgatgagctacATCTTTAAATcttattatacaTTGTATAAAATTATATTGCGaggtagtaaattgatattat	UA177	UB6	UC4	-1	-1	-1
U971	-1	1861683	1151	M3	0.991008991008991	SigA	1	tgcatacacaaccaaaagtgtataatatcaatttactACCTCGCAATataattttataCAATGTATAATAAGATTTAAagatgtagctcatcaacattttc	UA5	UB4	UC4	1861683	1861509	1861458	S771		new_1861466_1861610_-1
U972	1	1862247	1344	M3	0.972027972027972	SigA	0.991008991008991	gaaagatttccccgacatctataacttgtATAATGTGTAtatgtcgttttTAGAGTATAATAATATAAAAgaccttgaataaaggagggataatatgacta	UA131	UB8	UC3	1862247	1863150	1863150	NA, S773		SAOUHSC_01957, new_1863070_1863192_1
U973	-1	1863923	951	M3	0.997002997002997	SigA	1	tgtttagctgttacttaaagaaaatcaaatattatatataCGCTTGAAAAaataaaataatAATATTATAATATAATCAATcggcatctacgtgcggatta	UA265	UB38	UC1	1863923	1863855	1863855	S774		new_1863829_1863923_-1
U974	-1	1864399	72	M5	0.934065934065934	NM	0.98001998001998	agtcatacaagcagaagtgaaatatcgcttctgtttttttattacatatttattgttgaggaaggttgtccgagctggccgaaggagcacgcctggaaagt	UA175	UB62	UC1	1864399	1863872	1863872	NA, S775, S774		SAOUHSC_T00050, new_1863925_1864286_-1, new_1863829_1863923_-1
U975	-1	1865083	940	M3	0.981018981018981	SigA	1	agagataacatttaaattaaattcaaaaagTTCTTGACTTtaggtttttgatTATGGTATATTAATTAGGTAattcaaaataatattagcgcgggatggag	UA103	UB38	UC1	1865083	1863583	1863583	NA, S775, S774, S772		SAOUHSC_T00050, new_1863925_1864286_-1, new_1863829_1863923_-1, new_1862759_1863827_-1
U976	-1	1865206	398	M3	0.999000999000999	SigA	1	ataagaagcgtttttttacacaaaaaactttgaaaatgTCGTTGACGTacactacaaaaATGAATATACTAATATTTGTgttcaacagagaacatgttgct	UA20	UB1	UC1	1865206	1863855	1863583	S776, NA, S775, S774	S772	new_1865085_1865206_-1, SAOUHSC_T00050, new_1863925_1864286_-1, new_1863829_1863923_-1	new_1862759_1863827_-1
U977	-1	1866150	659	M3	0.919080919080919	SigA	0.999000999000999	acactttaattagaaatgtcactttgcgatataaCATTTCTAATtaaggtgttttTATTTTACAATTATAGGTAAtcagtcatttttttaaaaatagaaaa	UA3	UB1	UC1	1866150	1865402	1865402	S778, NA, S777		new_1866081_1866150_-1, SAOUHSC_01958, new_1865359_1865525_-1
U978	1	1869955	55	M3	0.995004995004995	SigA	0.996003996003996	attcgttcgtattttcaataaataaatgtcataaaactgACATTTAATCatagaactattTATTGTAAATTTAAATTCTAaagtccattattttgtatcat	UA176	UB25	UC7	1869955	1870069	1870630	S780	TRAP	new_1869967_1870068_1	SAOUHSC_01964
U979	1	1870070	876	M3	0.996003996003996	SigA	1	tcgcaagattcattatagtaattttaatcaattattaaTAGTGGTAATgactagtttatCATCGTATAATAAATAAAAAcataagggggacctttcatatg	UA75	UB1	UC1	1870070	1870664	1870664	TRAP		SAOUHSC_01964
U980	-1	1872728	557	M4	0.635364635364635	SigA	0.999000999000999	attataacattgtcgctaaaaattcgatattaggacatgtgtatttaatatgagcattttataatTTTTGGTACAATATAAGTCAtggaggtgccttatga	UA3	UB1	UC1	1872728	1870689	1870689	NA, NA		SAOUHSC_01967, SAOUHSC_01966
U981	1	1872784	351	M4	0.572427572427572	SigA	1	attataaaatgctcatattaaatacacatgtcctaaTATCGAAtttttagcgacAATGTTATAATGAATGGTAAtactagttgaaaaggagtgtagtcatc	UA209	UB1	UC1	1872784	1875016	1875016	hit, S781, NA, S782, S783, NA		SAOUHSC_01968, new_1873282_1873388_1, SAOUHSC_01969, new_1873755_1873852_1, new_1873854_1874436_1, SAOUHSC_01971
U982	1	1873282	1387	M2	0.998001998001998	SigB	0.998001998001998	ctgaacaaattcaagcacaattttaaatgtATGCTTAAtctaagctcgaacGGGTATAATatgattaatattataacaattgcgtttgaagtgataacatc	UA12	UB7	UC3	1873282	1875016	1875016	S781, NA, S782, S783, NA		new_1873282_1873388_1, SAOUHSC_01969, new_1873755_1873852_1, new_1873854_1874436_1, SAOUHSC_01971
U983	-1	1873817	1499	M1	0.985014985014985	NM	0.987012987012987	ttttaaaaaagagatgacaagaaatatctaatttctaatgTCATCTCgtttatttgGCATTTaattttaaaaaataaatatgctgttactaataaaaatag	UA90	UB23	UC9	1873817	1873477	1873477
U984	1	1874438	595	M3	0.996003996003996	SigA	1	tcctttcttcttatataacaattcttctaacatgatatgttaCTATTGAATTactgaacctgagTTAGTTATAATCTAACTTATattgaaaagagatgagg	UA3	UB1	UC1	1874438	1875101	1876206	NA	S784, prsA	SAOUHSC_01971	new_1875100_1875248_1, SAOUHSC_01972
U985	1	1875100	302	M3	0.956043956043956	SigA	0.969030969030969	tataacaaaataattatagcaaggtgttatTATTTGTTTTtaggctatgtaaTAGCTTACAATCAAATGTATatagaccttgtttttttattttcatcaat	UA1	UB1	UC1	1875100	1876206	1876206	S784, prsA		new_1875100_1875248_1, SAOUHSC_01972
U986	-1	1881622	533	M4	0.669330669330669	SigA	1	actgttataaatgtgtctcaatttcatatgttcatCGACGAtatgaagcgtatTATGGTAAAATGAAGAAATaataaacttgttaataaataaaacatcac	UA3	UB1	UC1	1881622	1876333	1876333	S785, NA, NA, cbf1		new_1881393_1881620_-1, SAOUHSC_01975, SAOUHSC_01974, SAOUHSC_01973
U987	-1	1882556	550	M3	0.988011988011988	SigA	1	tattggatttttccaaggtttggttgcaaTCTTTGTCTAaaaaagcgagaTGTGGTAAAGTAATATCGAAcgttttaataaacatcacaacaaaggagtgc	UA3	UB1	UC1	1882556	1882113	1882113	NA		SAOUHSC_01977
U988	-1	1883745	682	M4	0.588411588411588	SigA	0.938061938061938	tgtaaactaataataaattgagcagaaagtgaaatgattaatgaattaaaaaataaaaatAGTGGTATAATGAATAACTatgttgtcacaaaggagtcaaa	UA3	UB1	UC1	1883745	1882147	1882130	NA, NA		SAOUHSC_01978, SAOUHSC_01977
U989	1	1884611	504	M3	0.992007992007992	SigA	0.999000999000999	gcataatcactagatttgataaaacttacacttttataaTGATATCAAAtttacaaagaaAACTGTATAATAAACCCTATcgctataaaaaattcatcaaa	UA3	UB1	UC1	1884611	1885505	1885505	S787		new_1884611_1885552_1
U990	-1	1886499	617	M3	1	SigA	1	gagtaatcaaggccattttatcatgtttacgtctaAGATTTAAAAatataataactCAATGTATAATAGTTAATACacgtaaaaatgaattggagcgattt	UA3	UB1	UC1	1886499	1883898	1883898	NA, NA, S786, NA		SAOUHSC_01981, SAOUHSC_01980, new_1884345_1884699_-1, SAOUHSC_01979
U991	1	1886545	540	M4	0.919080919080919	SigA	0.998001998001998	tattaactattatacattgagttattatatttTTAAATCTtagacgtaaaCATGATAAAATGGCCTTGAttactcaatagttatatttcggagaactgatt	UA3	UB1	UC1	1886545	1887477	1887477	NA		SAOUHSC_01982
U992	1	1886593	231	M4	0.939060939060939	SigA	1	aacatgataaaatggccttgattactcaatagttatatttcggagaactgattTGTGATATGATATTAAAGActataggaggattttatgaaatttaaaat	UA159	UB55	UC1	1886593	1887477	1887477	NA		SAOUHSC_01982
U993	-1	1887587	74	M5	0.946053946053946	NM	0.959040959040959	gaaaaagactacaagtcattatccaaggatgttataaaatgaataattactaaaatatcaaaatataaaatcctaagcatcgtaaaaaacaaaaaaaccga	UA169	UB32	UC1	1887587	1887553	1887553
U994	-1	1889339	1274	M4	0.722277722277722	SigA	1	ttagtgtatttttatttcaaattatgaaaacgttttaatcataaaTTGCTCAATtaaattatttAATGATATACTACAGTTAAataaacagtgataagggg	UA189	UB3	UC3	1889339	1887910	1887910	fumC		SAOUHSC_01983
U995	-1	1889915	837	M4	0.908091908091908	SigA	1	taatatttttaatgaaatcattaaaccgcgttTCTTAATatgccaagatTATGATATGCTATTGAAGAatgaaattagaggagatttatatatttatgtta	UA3	UB1	UC1	1889915	1889474	1889474	NA		SAOUHSC_01984
U996	-1	1891498	1318	M2	0.993006993006993	SigB	0.993006993006993	aagtgctatatttagagtataagcatgttaaagttaaaTGGTTTGAtatattgaaagttaGGGTATAATaattattaatatcgccgtttttatgtaaaatg	UA74	UB13	UC3	1891498	1889474	1889474	NA, NA, S790, S789, NA		SAOUHSC_01987, SAOUHSC_01986, new_1890553_1890656_-1, new_1889917_1890551_-1, SAOUHSC_01984
U997	-1	1893231	706	M4	0.998001998001998	SigA	0.999000999000999	tcaagctttttattattaaaattatgtgaaatgaaaCCTCAATATgaataatggtTGTGTTAAAATAACATAGTattattttatggggggcatacgattgg	UA3	UB1	UC1	1893231	1890596	1890511	queG, NA, S791, NA, NA, S790		SAOUHSC_01989, SAOUHSC_01988, new_1891500_1891591_-1, SAOUHSC_01987, SAOUHSC_01986, new_1890553_1890656_-1
U998	-1	1895557	240	M3	0.993006993006993	SigA	1	gcttttctttatattgataaaaatacatttataaaacaCTATTGCATCaaaatgtattaATATGTATAATTATGAATATtaattagggagggctgtataaa	UA171	UB1	UC1	1895557	1893367	1893367	NA, glnQ		SAOUHSC_01991, SAOUHSC_01990
U999	-1	1898994	1506	M1	0.797202797202797	NM	0.806193806193806	ataggtgtaaatcctatcttccgctccataattgcttccaaagggaagttttttgtttaccattaagccggtgtggcggaattggcagacgcgcgggactc	UA248	UB41	UC9	1898994	1898892	1898892	NA		SAOUHSC_T00031
U1000	-1	1899606	1504	M1	0.988011988011988	NM	0.992007992007992	gcggactgtaaatccgctccttcgggttcggcagttcgaatctGCCCCCCtccatttattATTTTtaataggggcatagttcaacggtagaatagaggtct	UA248	UB41	UC9	1899606	1898892	1898892	NA, NA, NA		SAOUHSC_T00056, SAOUHSC_T00015, SAOUHSC_T00031
U1001	-1	1906636	765	M3	1	SigA	1	ttgaattaattgagttaggaaatttattttttagaaataaaataattaaaaataaTTCTTGACTTacaaaaacttaCGAGTTATAATTAAATCTTGtaagt	UA3	UB1	UC1	1906636	1904383	1904383	S793		new_1906486_1906636_-1
U1002	-1	1906830	802	M3	0.959040959040959	SigA	1	ttcaacagtaatttttaaacaaaaataagtgttgttttATGTTGACTCtactagaataaCTTGATATTATATAAAAGTCgtcaaacggcactaatatttaa	UA3	UB1	UC1	1906830	1904519	1904383	S794, S793		new_1906638_1906830_-1, new_1906486_1906636_-1
U1003	1	1907690	25	M1	0.82017982017982	NM	0.82017982017982	tcttctagttcatgttcaattgattctatttcaacACTCATCtatatcaccaTCTTTCttatataataattattattacttactataaatataactgtagt	UA39	UB22	UC8	-1	-1	-1
U1004	-1	1907717	1359	M3	0.997002997002997	SigA	0.998001998001998	aaggctattaaatgaaatcatcatgtaaATATTGACACgcgcgcaatactACAGTTATATTTATAGTAAGtaataataattattatataagaaagatggtg	UA266	UB7	UC3	1907717	1906831	1906185	S796, perR, S795	S794, S793	new_1907719_1907766_-1, SAOUHSC_01997, new_1907151_1907223_-1	new_1906638_1906830_-1, new_1906486_1906636_-1
U1005	1	1909219	445	M4	0.997002997002997	SigA	0.999000999000999	tgttctcctttttgcaacatataatcacctttttCTTCATTATaataatttTATGATACGATATTAGATGaaaatattaaattaaaagaggttgatataaa	UA93	UB1	UC1	1909219	1910563	1910563	S797, gsaB		new_1909220_1909372_1, SAOUHSC_02000
U1006	-1	1909224	310	M3	0.996003996003996	SigA	0.999000999000999	aaacgttcactttcactaaaattcatttatatcaacctctttTAATTTAATAttttcatctaaTATCGTATCATAAAATTATTataatgaagaaaaaggtg	UA1	UB1	UC1	1909224	1907715	1906967	NA, NA, S796	perR, S795	SAOUHSC_01999, SAOUHSC_01998, new_1907719_1907766_-1	SAOUHSC_01997, new_1907151_1907223_-1
U1007	1	1910733	618	M3	0.998001998001998	SigA	1	aatttatactattttaatctctgactaaAGTTTTACATcgctatcagtaTTATGTATGATTTATTTTAAcaactataaataagcttgaattttgtaactag	UA3	UB1	UC1	1910733	1911991	1911991	S798, NA		new_1910787_1910891_1, SAOUHSC_02001
U1008	1	1910787	247	M3	0.998001998001998	SigA	0.998001998001998	tatgatttattttaacaactataaataAGCTTGAATTttgtaactagtAAGTGTATAACAGTAATGAAtacgaatattagatattcaataaacttaaaagg	UA16	UB1	UC1	1910787	1911991	1911991	S798, NA		new_1910787_1910891_1, SAOUHSC_02001
U1009	-1	1914739	353	M4	0.657342657342657	SigA	1	taagtagtaaaatcttatttcgtaaaaatatgtatttataTAATActatttctgaaaTATGCTATAATTTATAATGgttaaattaacagaaggtggtgtgg	UA209	UB1	UC1	1914739	1912203	1912203	NA, S800, S799, NA		SAOUHSC_02004, new_1913979_1914152_-1, new_1913863_1913977_-1, SAOUHSC_02003
U1010	-1	1916079	701	M3	0.962037962037962	SigA	0.97002997002997	tttcgcaaataactaaattaacttacatactaACCATGattttaatgtacaatAAAAACATTATGAGTAAAGAcaattaattttggtgaggaaagggtttt	UA3	UB1	UC1	1916079	1914753	1912203	mutY, S801	NA, S800, S799, NA	SAOUHSC_02005, new_1914741_1914996_-1	SAOUHSC_02004, new_1913979_1914152_-1, new_1913863_1913977_-1, SAOUHSC_02003
U1011	1	1916139	1357	M3	0.997002997002997	SigA	1	atgtttttattgtacattaaaatcatggttagtatgtaagtTAATTTAGTTatttgcgaaatTGGATTATAATAGTATATATaatattatgaaatgagtga	UA267	UB28	UC3	1916139	1917193	1917193	NA		SAOUHSC_02006
U1012	-1	1920956	323	M3	0.991008991008991	SigA	1	ttagcatcgaaaaatatttaaagttaaaCATTTGCTATaggaagtggctTATTGAATAATAAAAGAGTAttgtattaaaacttaagaaagtaacggggtga	UA1	UB1	UC1	1920956	1917320	1917320	recX, NA, NA, NA, S803		SAOUHSC_02011, SAOUHSC_02010, SAOUHSC_02009, SAOUHSC_02008, new_1917273_1917423_-1
U1013	-1	1922029	1048	M3	0.894105894105894	SigA	1	cgattgtaagcccttggactgattttcccaaaaaGTGTAGCCTAtttgtgatagtACTGGTAAACTCAAGGTATAtactaagtgagttttaaaagaaggag	UA94	UB40	UC5	1922029	1921077	1921077	sgtB		SAOUHSC_02012
U1014	-1	1922881	1395	M2	0.997002997002997	SigB	0.997002997002997	gatatcgcgacagtcgcttaatattttttatatcttgtATGTTTAAtcactgatttacttGTCTATAGTaattatatcaatgatatatagaaaggtgattt	UA12	UB7	UC3	1922881	1921111	1921111	NA, S805, S804, sgtB		SAOUHSC_02013, new_1922214_1922321_-1, new_1922031_1922212_-1, SAOUHSC_02012
U1015	-1	1923170	493	M4	0.689310689310689	SigA	0.996003996003996	aatttgaatgtcataaatatagctaagattaTATCGCTTTaacgcaattTCTGTTAGGATAATAATGAaaaagaaaacaaaataaaaggagttaacttttt	UA3	UB1	UC1	1923170	1922250	1921111	NA, S806, NA, S805	S804, sgtB	SAOUHSC_02014, new_1922883_1922967_-1, SAOUHSC_02013, new_1922214_1922321_-1	new_1922031_1922212_-1, SAOUHSC_02012
U1016	-1	1923878	1477	M4	0.748251748251748	SigA	0.999000999000999	acttaactttaaatacaactgaaaaactaTACAGttacgcacgacaAGTGTTATAATATAAATGTgaaatggtcattcttgaaatgactcggtcgctactg	UA260	UB7	UC3	1923878	1923627	1923627	S808		new_1923624_1923878_-1
U1017	1	1924197	1473	M3	0.983016983016983	SigA	1	ggtaggcttaataaaaacaatattaaatacatttgttctgtcaTAATTGAAAAcctccaaataaTATTATATTATATAAGTGTAaggaggagccatcaggc	UA268	UB7	UC3	1924197	1924299	1924367	S809		new_1924231_1924343_1
U1018	1	1924231	1474	M3	0.98001998001998	SigA	0.992007992007992	gttctgtcaTAATTGAAAAcctccaaataaTATTATATTATATAAGTGTAaggaggagccatcaggctccaagcataatgttaatctttgttgtttggctt	UA268	UB7	UC3	1924231	1924367	1924367	S809		new_1924231_1924343_1
U1019	-1	1924444	1055	M3	0.999000999000999	SigA	1	ggtacttgcctatttttttatgcaaattttaaaaaaCACTTTACTAataaacatttgTTTAGTATAATTATATTTGTaggttagttgatgacttacaaatt	UA269	UB5	UC5	1924444	1923678	1923627	NA, NA, NA, S808		SAOUHSC_02018, SAOUHSC_02017, SAOUHSC_02016, new_1923624_1923878_-1
U1020	-1	1924800	1465	M2	0.994005994005994	SigB	0.994005994005994	agtaagaaaagtggggccattcttatcttgtccagtGGGTTATcagttccaacctggtGGGTATTGTgattatacagaagtgatgttacaagatggtcatg	UA27	UB7	UC3	1924800	1924562	1924562	S810		new_1924468_1924646_-1
U1021	1	1950564	1227	M1	0.998001998001998	NM	1	ctcgcgctatacgctttttaaaattaaaaaaggattggctataatcAGCCAACCcacatagatCCTTTAttcctaattgcgataagggaaacgcagtacga	UA270	UB74	UC17	1950564	1951363	1951363
U1022	-1	1956998	1230	M1	0.981018981018981	NM	0.986013986013986	aaattgcgacaacaacgctatcgtgagaaacagaaaaagttactagaaGCAAaacgtaacgttaCCGTAacgttacgtaacgatacagaagaagaagaaga	UA271	UB74	UC17	1956998	1950572	1950572	NA, NA, NA, NA, NA, NA, NA, NA, NA, NA, NA, S812		SAOUHSC_02068, SAOUHSC_02067, SAOUHSC_02066, SAOUHSC_02062, SAOUHSC_02061, SAOUHSC_02058, SAOUHSC_02057, SAOUHSC_02056, SAOUHSC_02053, SAOUHSC_02052, SAOUHSC_02051, new_1950544_1950672_-1
U1023	1	1960585	787	M3	0.99000999000999	SigA	1	tttagtgtaataatgttgttcagttttaatattttcagtcaTAGTTGACTAcctccgtatatTTTGATTTAATTAAGTTGTAtattttgatgaacacttat	UA3	UB1	UC1	1960585	1962124	1962124	S814, S815		new_1960585_1960960_1, new_1960962_1962644_1
U1024	-1	1960619	1228	M1	0.986013986013986	NM	0.997002997002997	aaggaatacttttatgaagaatgaaaaaactgctacttgcgccaacaagtaacaataagtgttcatcaaaatatacaacttaattaaatcaaaatatacgg	UA272	UB74	UC17	1960619	1924562	1924562	NA, NA, NA, S813, NA, NA, NA, NA, NA, NA, NA, NA, NA, NA, NA, NA, NA, NA, S812, NA, NA, NA, NA, NA, S811, NA, NA, NA, NA, NA, NA, NA, NA, NA, NA, NA, NA, NA, NA, NA, NA, NA, NA, NA, NA, NA, NA, NA, S810		SAOUHSC_02075, SAOUHSC_02074, SAOUHSC_02073, new_1958584_1958666_-1, SAOUHSC_02071, SAOUHSC_02070, SAOUHSC_02069, SAOUHSC_02068, SAOUHSC_02067, SAOUHSC_02066, SAOUHSC_02062, SAOUHSC_02061, SAOUHSC_02058, SAOUHSC_02057, SAOUHSC_02056, SAOUHSC_02053, SAOUHSC_02052, SAOUHSC_02051, new_1950544_1950672_-1, SAOUHSC_02050, SAOUHSC_02049, SAOUHSC_02048, SAOUHSC_02047, SAOUHSC_02046, new_1945883_1945990_-…
U1025	-1	1962591	1231	M1	0.996003996003996	NM	0.997002997002997	agagctggcgatgatatgagccgcgtttaaatacattcGATAGTCattgcgataaCCGTCtgctgaatgtgggtgttgaggaaaaaggaggatactcaaat	UA271	UB74	UC17	1962591	1950572	1924562	NA, NA, NA, NA, NA, NA, NA, S813, NA, NA, NA, NA, NA, NA, NA, NA, NA, NA, NA, NA, NA, NA, S812	NA, NA, NA, NA, NA, S811, NA, NA, NA, NA, NA, NA, NA, NA, NA, NA, NA, NA, NA, NA, NA, NA, NA, NA, NA, NA, NA, NA, NA, S810	SAOUHSC_02080, SAOUHSC_02079, SAOUHSC_02078, SAOUHSC_02077, SAOUHSC_02075, SAOUHSC_02074, SAOUHSC_02073, new_1958584_1958666_-1, SAOUHSC_02071, SAOUHSC_02070, SAOUHSC_02069, SAOUHSC_02068, SAOUHSC_02067, SAOUHSC_02066, SAOUHSC_02062, SAOUHSC_02061, SAOUHSC_02058, SAOUHSC_02057, SAOUHSC_02056, SAOUHSC_02053, SAOUHSC_02052, SAOUHSC_02051, new_1950544_1950672_-1	SAOUHSC_02050, SAOUHSC_02049, SAOUHSC_02048, SAOUHSC_02047, SAOUHSC_02046, new_1945883_1945990_-1, SAOUHSC_02044, SAOUHSC_02043, SAOUHSC_02042, SAOUHSC_02041, SAOUHSC_02040, SAOUHSC_02038, SAOUHSC_02037, SAOUHSC_02036, SAOUHSC_02035, SAOUHSC_02034, SAOUHSC_02033, SAOUHSC_02031, SAOUHSC_02030, SAOUHSC_02029, SAOUHSC_02028, SAOUHSC_02027, SAOUHSC_02026, SAOUHSC_02025, SAOUHSC_02023, SAOUHSC_02022, …
U1026	-1	1963275	1229	M3	0.952047952047952	SigA	0.952047952047952	aaaaaaatacacgaaaagcaaacttttATGTTGACTCaagtacacgtaTCGTGTATAGTAGGTTTTGTaagcgggaggtgacaacatgcaatggaatttaa	UA271	UB74	UC17	1963275	1924562	1924562	NA, NA, S816, NA, NA, NA, NA, NA, NA, NA, S813, NA, NA, NA, NA, NA, NA, NA, NA, NA, NA, NA, NA, NA, NA, S812, NA, NA, NA, NA, NA, S811, NA, NA, NA, NA, NA, NA, NA, NA, NA, NA, NA, NA, NA, NA, NA, NA, NA, NA, NA, NA, NA, NA, NA, S810		SAOUHSC_02083, SAOUHSC_02081, new_1962593_1962648_-1, SAOUHSC_02080, SAOUHSC_02079, SAOUHSC_02078, SAOUHSC_02077, SAOUHSC_02075, SAOUHSC_02074, SAOUHSC_02073, new_1958584_1958666_-1, SAOUHSC_02071, SAOUHSC_02070, SAOUHSC_02069, SAOUHSC_02068, SAOUHSC_02067, SAOUHSC_02066, SAOUHSC_02062, SAOUHSC_02061, SAOUHSC_02058, SAOUHSC_02057, SAOUHSC_02056, SAOUHSC_02053, SAOUHSC_02052, SAOUHSC_02051, new_19…
U1027	1	1963362	1047	M3	0.988011988011988	SigA	1	tcaacataaaagtttgcttttcgtgtatttttTTGTTGAATAccaaaaataatTGGGTTATACTATAGGTAAAtttaaggaggtaagaaaatggataaaaa	UA273	UB40	UC5	1963362	1968108	1968108	NA, S817, S819, NA, NA, S820, int, NA		SAOUHSC_02084, new_1964112_1964180_1, new_1964349_1964507_1, SAOUHSC_02086, SAOUHSC_02087, new_1965635_1965882_1, SAOUHSC_02089, SAOUHSC_02090
U1028	-1	1970499	695	M4	0.897102897102897	SigA	0.998001998001998	ctttaaacaataagaaagcagattatataaaattctattaaagtttattaaatTGTGATACTTTGATAACATAactattattagaggtgaacattgtggct	UA3	UB1	UC1	1970499	1968388	1968388	NA, ampS, S821, NA		SAOUHSC_02093, SAOUHSC_02092, new_1968910_1968998_-1, SAOUHSC_02091
U1029	1	1970562	1316	M2	0.957042957042957	SigB	0.957042957042957	tcacaatttaataaactttaatagaattttatataatctgctttcttaTTGTTTAAagtcgctataaaatGGGGATATAactacatagtttggaggaatca	UA24	UB13	UC3	1970562	1971559	1972851	ptpA, NA, S822	NA	SAOUHSC_02095, SAOUHSC_02096, new_1971375_1971573_1	SAOUHSC_02097
U1030	1	1971575	1036	M2	1	SigB	1	atttctataatattatcatttttaaagcatatcaTTGTTTAGtttttttataattGGATAAATActaatagttactttataaaacattacatagagaaagg	UA154	UB10	UC5	1971575	1972851	1972851	NA		SAOUHSC_02097
U1031	-1	1976650	81	M5	0.943056943056943	NM	0.976023976023976	gaacgggataaaatgattgtaaaaacagaagaagaattacaagcgttaaaagaaattggatacatatgcgctaaagtgcgcaatacaatgcaagctgcaac	UA252	UB46	UC1	1976650	1975936	1975936	map		SAOUHSC_02102
U1032	-1	1976737	828	M3	0.619380619380619	SigA	1	gtctcactcactttccaaaatactaaagtaacatCTTTAGTAtatcaaagaattTTTGCTATAATAAGTTATAAttatataaaaaaggaacgggataaaat	UA3	UB1	UC1	1976737	1972910	1972910	map, S824, NA, NA, vraS, vraR, S823		SAOUHSC_02102, new_1975724_1975891_-1, SAOUHSC_02101, SAOUHSC_02100, SAOUHSC_02099, SAOUHSC_02098, new_1972873_1972961_-1
U1033	1	1976753	528	M4	0.642357642357642	SigA	0.999000999000999	aatcattttatcccgttccttttttatataattataacTTATTATagcaaaaattcTTTGATATACTAAAGATGTtactttagtattttggaaagtgagtg	UA3	UB1	UC1	1976753	1978546	1978546	S825, NA, S827		new_1976761_1977225_1, SAOUHSC_02103, new_1978213_1978582_1
U1034	-1	1977177	822	M3	0.968031968031968	SigA	0.997002997002997	ttgatcgttcattttttaacctctaaTCATCGTAAAatcttagcgagCGCTTTATAATAATAGTATCgtacattggaaaagttcatgtatgtaaaatattt	UA3	UB1	UC1	1977177	1972927	1972910	S826, NA, map, S824, NA, NA, vraS, vraR	S823	new_1976961_1977177_-1, SAOUHSC_A02013, SAOUHSC_02102, new_1975724_1975891_-1, SAOUHSC_02101, SAOUHSC_02100, SAOUHSC_02099, SAOUHSC_02098	new_1972873_1972961_-1
U1035	-1	1979134	503	M3	0.741258741258741	SigA	0.994005994005994	tggatggaaacaaccaaattgatgtgtgttTTTTTGTTCTagtgaataatTATTATACAATGAGTATCTAtcctagaattatcaatagtaatggtgattat	UA3	UB1	UC1	-1	-1	-1
U1036	-1	1981355	633	M4	0.829170829170829	SigA	0.997002997002997	acactgtatcaatttgtgattgagaaacttttttgaagttgccttgtCATGTTATAATGATGCGAGtggaaatttgaggaggaaacacatgagacagtgga	UA3	UB1	UC1	1981355	1979234	1979234	NA, NA		SAOUHSC_02107, SAOUHSC_02106
U1037	1	1981566	115	M3	0.833166833166833	SigA	1	gtgctaaaataaggcattaaattataattattaTTATTTACAAttgagaatgagTTTGTTATACTAAGTTTAATtcatagtaattttaatttacaaataag	UA274	UB75	UC1	1981566	1983051	1983051	ftnA, S828, S829, NA		SAOUHSC_02108, new_1982182_1982300_1, new_1982302_1982507_1, SAOUHSC_02110
U1038	1	1982302	496	M3	0.938061938061938	SigA	0.999000999000999	cattgatctgcgttttttcattttcaaggctaaTTATTGTATTtttagtcatttaTTTTTTAAACTACTAATGTTaataactctaaatttgatgttgaatt	UA3	UB1	UC1	1982302	1983051	1983051	S829, NA		new_1982302_1982507_1, SAOUHSC_02110
U1039	-1	1984262	1236	M3	0.985014985014985	SigA	0.998001998001998	agttatctcaatatagttatcgctaagtgcaagaTTTATGTAAAaaaatcgtacaCAGCGTATAATTATGTTGAGatatttttgtgcgttataaaagtaaa	UA275	UB2	UC2	1984262	1983144	1983144	S830, dinP		new_1984171_1984262_-1, SAOUHSC_02111
U1040	-1	1985028	1094	M3	0.989010989010989	SigA	1	aaattttattacagccaatttactttcttgatatgAACTTTTTAAattaaatgtgaCATTGTATACTATATTTAAAgaagaataagaatgtcatgatcggg	UA7	UB5	UC5	1985028	1984351	1984351	NA, S831		SAOUHSC_02112, new_1984305_1984446_-1
U1041	-1	1988122	524	M3	0.999000999000999	SigA	1	taatggtaaaaatattaattttattaatgcgttAGCTTTAATTatattaaggcaAACTGTATAATAAAAAGGTAtaaaacatttttgtataaagacaacat	UA3	UB1	UC1	1988122	1984368	1984351	S833, NA, rumA, S832, NA, S831		new_1987537_1988118_-1, SAOUHSC_02114, SAOUHSC_02113, new_1985030_1985146_-1, SAOUHSC_02112, new_1984305_1984446_-1
U1042	-1	1991551	712	M4	0.906093906093906	SigA	0.999000999000999	tatacagtttatatgaaattaaagtagcacctcataaatactTAGATTTTtaattggaaaTTTGATACAATTTAGTGATgaatgacttaaaggaggctttt	UA3	UB1	UC1	1991551	1988295	1988295	gatC, gatA, gatB		SAOUHSC_02118, SAOUHSC_02117, SAOUHSC_02116
U1043	1	1991823	583	M3	1	SigA	1	aagtatttcaaaaagaataaatttaattttccTACTTTTCTAaacatttatctTTATGTATAATGTTTTCAAGtaactaaattataaattaaataaaggga	UA3	UB1	UC1	1991823	1993404	1993404	putP		SAOUHSC_02119
U1044	-1	1994993	976	M4	0.962037962037962	SigA	0.997002997002997	tatttagaaaatgaagatattcgtgctttaattcaaaaattaaaagataaaCATGTTAATATGATTTATAaaggtatcaaaacatcagatattgaaggaca	UA243	UB33	UC1	1994993	1993497	1993497	NA		SAOUHSC_02121
U1045	-1	1999635	709	M4	0.985014985014985	SigA	0.998001998001998	cagagtaaaagaacttaaatttcatattaagtcttTAGAACTCGacacttaaaAATGCTATAATCATATGTAtgttaaaaaaggagtttcggaaaatgtat	UA3	UB1	UC1	1999635	1993497	1993497	pcrB, pcrA, ligA, NA		SAOUHSC_02124, SAOUHSC_02123, SAOUHSC_02122, SAOUHSC_02121
U1046	-1	2001627	697	M3	0.996003996003996	SigA	0.998001998001998	caattagaaatcagtattaatctgccatagaTAATTGTATTaatgtaaaaaaTAAAATAGAATGAGAATATAcggaaattttttatacatttataaccaat	UA3	UB1	UC1	2001627	1993514	1993514	S835, purB, S834, hisR, pcrB, pcrA, ligA, NA		new_2001479_2001627_-1, SAOUHSC_02126, new_2000075_2000182_-1, SAOUHSC_02125, SAOUHSC_02124, SAOUHSC_02123, SAOUHSC_02122, SAOUHSC_02121
U1047	1	2002311	1142	M3	0.952047952047952	SigA	1	attttttaaacatagattaaaattttATATTGAAACtcttaactaaaTTTAATATAATTATTTTATAataaaataaaggagtttttatatgaaaagaaact	UA17	UB9	UC4	2002311	2003978	2003978	NA, NA, S836		SAOUHSC_02127, SAOUHSC_02129, new_2003863_2004006_1
U1048	-1	2007508	556	M4	0.921078921078921	SigA	0.999000999000999	ttgattttaattaaaagtatggaaattaaggggctcttatgtatataaaaaaatgaatTATGATAAAATGTAAGAAAatatttaggtcgattggagagata	UA3	UB1	UC1	2007508	2004139	2004139	S838, NA, nadE, S837, NA, NA		new_2007438_2007508_-1, SAOUHSC_02133, SAOUHSC_02132, new_2004911_2005180_-1, SAOUHSC_02131, SAOUHSC_02130
U1049	1	2007619	846	M3	0.97002997002997	SigA	0.999000999000999	ttaaaatcaaccaacaatttaatgacatatacaTAATTTTTAAgagtattttaaTAATGTAGACTATAATATAAagcgaggtgttgttaatgttatttaaa	UA3	UB1	UC1	2007619	2009554	2009554	NA, pheA		SAOUHSC_02134, SAOUHSC_02135
U1050	1	2012864	592	M3	1	SigA	1	tcttatattatttgttgattgcgtgatttgCTCTTCCAAAaaagttgattaATCTATATACTTAATCTATAtttatatattaaccattagggttaaaaatt	UA3	UB1	UC1	2012864	2014518	2014518	S841, NA, ppaC		new_2012869_2012963_1, SAOUHSC_02139, SAOUHSC_02140
U1051	-1	2012877	1333	M2	0.821178821178821	SigB	0.821178821178821	aataaactcccatctattcataaatgctAGAGTAAtttttaaccctaatGGTTAATATataaatatagattaagtatatagattaatcaacttttttggaa	UA13	UB8	UC3	2012877	2009647	2009647	NA, S840, sdcS, S839		SAOUHSC_02138, new_2011291_2011494_-1, SAOUHSC_02137, new_2009615_2009727_-1
U1052	1	2013532	84	M4	0.997002997002997	SigA	0.997002997002997	cacttgcacatttcaaaaactcattaggtgcagaggTAGAACAACacgtttaaatCGTGCTAAAATAATTATAAagaatacaatttacaagggagatattt	UA139	UB46	UC1	2013532	2014518	2014518	ppaC		SAOUHSC_02140
U1053	1	2014762	320	M3	0.875124875124875	SigA	0.987012987012987	tacattttcttaaaatatttgcgatgttgagtataaaTTTTTGTTTTcttcctacctttTTCGTTATGATTAAAGTTATaaatattattatgtacacgatt	UA1	UB1	UC1	2014762	2016354	2016354	S842, aldH		new_2014762_2014925_1, SAOUHSC_02142
U1054	-1	2017487	271	M3	0.917082917082917	SigA	1	aatagttttagctttaaggaaatgataaaTGATTGTTAAttctagctaaaaTTTAATAAAATGAAAATAAGactaacatggaggggtaaaagtaatgacaa	UA10	UB1	UC1	2017487	2016430	2016430	NA		SAOUHSC_02143
U1055	1	2017694	1016	M3	0.998001998001998	SigA	1	attaacgcgtttatgcttccacaaaatttTTGTTGCAAAatagaacacatGTTCGTATAATGTAATTATCagattggggtgaattaaggatgacaagttat	UA223	UB37	UC5	2017694	2018139	2018139	NA		SAOUHSC_02144
U1056	-1	2018948	1464	M2	1	SigB	1	aaaataatcattagcttgctcactatataatttgATGAATATatttcgtgaaagtGGGTATTTAtttaatgattattctatatatgatagtataatgaaat	UA27	UB7	UC3	2018948	2017501	2016430	S844, NA, S843	NA	new_2018871_2018948_-1, SAOUHSC_02145, new_2017489_2018696_-1	SAOUHSC_02143
U1057	-1	2019237	1075	M3	0.99000999000999	SigA	0.999000999000999	ttgtaatatattgtaaataaatagtaatcgtatgtATATTGAATGtcatgttaaatAAAGTTATATTTTACTAAATgaaatataaaattgtttgaggtgat	UA6	UB5	UC5	2019237	2018674	2018572	S845, S844, NA	S843	new_2018950_2019235_-1, new_2018871_2018948_-1, SAOUHSC_02145	new_2017489_2018696_-1
U1058	-1	2022395	698	M3	0.564435564435564	SigA	0.999000999000999	taaattaattgcaaattctttgttaatttttgttaAGGATGAAACgggaagcacctTATGCTATATTTAAATAAGTacaaagaaagggtgacatcagtgcg	UA3	UB1	UC1	2022395	2020425	2020425	NA, S846, NA, NA		SAOUHSC_02149, new_2021740_2021873_-1, SAOUHSC_02148, SAOUHSC_02147
U1059	1	2022478	1194	M4	0.848151848151848	SigA	1	ccttaacaaaaattaacaaagaatttgcaattaatttatttcaTTACCTTTTattactataaATTGGTATAATGTTGTAAAtgctaaaggaggtttttaca	UA177	UB6	UC4	2022478	2023086	2023086	NA		SAOUHSC_02150
U1060	-1	2026749	211	M3	1	SigA	1	ttatttctgaagactggttgataatgagacatgcATATTTACAAaactgtgtataTTGTGTATATTGTATATATAcagaagttgatagggggacgttgatg	UA276	UB15	UC1	2026749	2023162	2023162	NA, NA, NA, NA, NA		SAOUHSC_02155, SAOUHSC_02154, SAOUHSC_02153, SAOUHSC_02152, SAOUHSC_02151
U1061	-1	2027178	800	M4	0.621378621378621	SigA	1	ttgaaagtgattagtaccttgaacttttgaaattcaataacttattaaaaaaatttataTTTGTTATAATGTCGATGTtgaggtgaaataaattgaaacat	UA3	UB1	UC1	2027178	2023162	2023162	NA, NA, NA, NA, NA, NA		SAOUHSC_02156, SAOUHSC_02155, SAOUHSC_02154, SAOUHSC_02153, SAOUHSC_02152, SAOUHSC_02151
U1062	1	2027285	1262	M4	0.547452547452547	SigA	0.989010989010989	ctaatcactttcaactaaaatagcgcaacaaaaccattcaatcaaaatgattattgaTtgcgatatattgtgttCAATGATATTATTTAAGTGTatccaca	UA277	UB76	UC3	2027285	2027336	2027336
U1063	-1	2027551	1371	M4	0.991008991008991	SigA	0.999000999000999	ggtgaattaacgaataatatgtaaaatctgctgccaaaatacGAACATATGttctgttttTATGTTAGAATAGGTGTAGgtcatccttcagtatgatactt	UA226	UB7	UC3	2027551	2027378	2027378	S847, NA		new_2027488_2027548_-1, SAOUHSC_02157
U1064	1	2027630	338	M3	0.502497502497502	SigA	0.997002997002997	gtattttggcagcagattttacatattattcgttaattcaccaacaacactttatcTTTGGTATAATTGAAGATAAtatataggcatacaatttttttaaa	UA15	UB1	UC1	2027630	2028951	2028951	NA		SAOUHSC_02158
U1065	-1	2031404	1114	M3	0.963036963036963	SigA	0.999000999000999	aattattgttaaagataatttattattaatattcagtTAATTCAAAAaatagagaaagtCTGGCTATAATTAAGTTGCAaatacgaattacacaaaaaagg	UA261	UB30	UC4	2031404	2029350	2029350	eap, truncated-mapW		SAOUHSC_02161, SAOUHSC_02160
U1066	1	2031706	69	M3	0.501498501498502	SigA	0.962037962037962	cttaaaaatataaattcgatttaataattaatttaaatttagttaaTCAATTttgcatctatttTGTTGTAAGCTATATAAAAGgagtgataatgatggtg	UA278	UB19	UC7	2031706	2033048	2033048	hlb, S848, S849, S850, NA, S851, NA		SAOUHSC_02163, new_2031939_2032098_1, new_2032100_2032203_1, new_2032205_2032309_1, SAOUHSC_02164, new_2032490_2032799_1, SAOUHSC_02166
U1067	1	2032205	485	M3	0.994005994005994	SigA	1	aggtgtatttttataggtaaatataataaattaGAGTAGACAActcagaattccAATTTTATAATAATATTGCTtgacatatcaaactagatagtactatt	UA3	UB1	UC1	2032205	2033048	2033048	S850, NA, S851, NA		new_2032205_2032309_1, SAOUHSC_02164, new_2032490_2032799_1, SAOUHSC_02166
U1068	-1	2033494	226	M3	0.996003996003996	SigA	0.997002997002997	agaagatctatatagttaatgaataatTAATGTACTTttttttagttaGTCATTAAAATAAATTAGTActaattactaaggagaataaaaaatgaaaatta	UA145	UB55	UC1	2033494	2033124	2033124	scn		SAOUHSC_02167
U1069	-1	2033651	1136	M3	0.626373626373626	SigA	0.999000999000999	tagtatattaaatttatttttgCGCTTTCCAAatcaatgtataTGTGTTATATTGTTTATGGGaagtaggtaagcatttcggtgcttacctttttttgttt	UA199	UB9	UC4	2033651	2033141	2033124	S852, scn		new_2033496_2033651_-1, SAOUHSC_02167
U1070	-1	2033770	1501	M4	0.9000999000999	SigA	0.969030969030969	atatatttgttttaattaaataaaattagataATGCAATAGtagccatttTATGTTAATATTACCTTGGgcgttttcaaggagcgcctttcattttttatg	UA279	UB77	UC9	2033770	2033668	2033141	S853	S852, scn	new_2033653_2033770_-1	new_2033496_2033651_-1, SAOUHSC_02167
U1071	1	2034072	228	M3	0.974025974025974	SigA	0.997002997002997	agttaaaaataattaatcttttattaatttccagtTAATTAATATatttcatcgatTAGATTAAACTCATTTTAGGaatttcgcaaaactaactataaatt	UA145	UB55	UC1	2034072	2034612	2034612	chp		SAOUHSC_02169
U1072	-1	2034102	233	M3	0.815184815184815	SigA	0.906093906093906	gctaatttctttttcataatgatgttaattctccttaaattctatatttAAATTTATAGTTAGTTTTGCgaaattcctaaaatgagtttaatctaatcgat	UA159	UB55	UC1	2034102	2033906	2033906
U1073	-1	2035469	454	M4	0.94005994005994	SigA	1	ggatgaaaaagtggataatccttttttaggcaggtacttCGGTACTTGcctattttttTATGTTATAATCTTTCTAGacgtattcaagggacgtcttttta	UA93	UB1	UC1	2035469	2034688	2034688	S854		new_2034987_2035470_-1
U1074	-1	2036260	1144	M3	0.997002997002997	SigA	0.999000999000999	ttttaatgtaagtttagtttcttttaatattTTATTGATTTttaatattttttCGATATAAAATGAAGTTGTTgatatttatcatcttaaataagggtgtt	UA17	UB9	UC4	2036260	2035623	2035623	S855, sak		new_2036167_2036252_-1, SAOUHSC_02171
U1075	1	2037439	420	M3	0.814185814185814	SigA	0.994005994005994	attcttatctccttttacccaaaataaaaagacgactaataagccgtcTATTTGATATttatattatggTGTGTTAATTTATATATAGAaaaagggcaaca	UA77	UB1	UC1	-1	-1	-1
U1076	-1	2037790	1147	M4	0.731268731268731	SigA	1	aaatgtaaataagttttagtcagtgcttcggtactgactttTTATTTattgttgtaatTATGGTAATATGCAGAAGTgagcaagttggatagatggtggct	UA280	UB72	UC4	-1	-1	-1
U1077	1	2064806	1153	M4	0.583416583416583	SigA	0.995004995004995	tacctgattctttgtaaactctaaatgttgccatttcgttatctccttTCTGGTATAATTTTGTTATCgctactgcgttagattgggggtgaataaaatat	UA281	UB4	UC4	2064806	2065161	2065161	NA		SAOUHSC_02218
U1078	1	2067830	110	M3	0.993006993006993	SigA	0.999000999000999	atacatcgccaattttgtagtacaTTGTTGACACttcctttatttCGTTTTATATTGAATATGCAttaattttctaattgtttagactgttactcattgcc	UA245	UB42	UC1	-1	-1	-1
U1079	1	2068391	813	M3	0.922077922077922	SigA	0.958041958041958	ggtattggaactgttacgtttaaaatatgtggcatttctatctttccttTCGTGTATAATGTTGTTATCtcctagtgaaaggaggtgatattggtgtatat	UA3	UB1	UC1	2068391	2069054	2069054	NA		SAOUHSC_02226
U1080	-1	2071375	1057	M3	1	SigA	1	attcaacaaaaaagttcataaatcatgaatttttGTATTGACTTgattcaaaacaAGGTGTAAAGTATAGTTAAGttcatgatacgtgaacttgagaggag	UA282	UB5	UC5	2071375	2065866	2065866	NA, NA, S861, NA, S860, NA, NA, NA, S859, NA, NA, NA, NA, NA		SAOUHSC_02234, SAOUHSC_02233, new_2070205_2070823_-1, SAOUHSC_02231, new_2069677_2069847_-1, SAOUHSC_02229, SAOUHSC_02228, SAOUHSC_02227, new_2068366_2069070_-1, SAOUHSC_02225, SAOUHSC_02223, SAOUHSC_02222, SAOUHSC_02220, SAOUHSC_02219
U1081	1	2071451	265	M3	1	SigA	1	caagtcaatacaaaaattcatgatttatgaacttttTTGTTGAATTtttgttcaacaAGCTTTATTATGAAGTTATCaaacggaggtgcactaaatgagag	UA10	UB1	UC1	2071451	2075446	2075446	NA, S862, int, S863, truncated-hlb		SAOUHSC_02235, new_2072256_2072468_1, SAOUHSC_02239, new_2074575_2074630_1, SAOUHSC_02240
U1082	-1	2077852	223	M4	0.843156843156843	SigA	0.987012987012987	aagtatttaataatattaacaaaatcatttaataaatagttaaaTATATATtctctgttttTGTGATATTATTCACATGTcgatacatatcaacaaatatc	UA145	UB55	UC1	2077852	2075709	2075709	S864, lukH, lukG		new_2077787_2077851_-1, SAOUHSC_02243, SAOUHSC_02241
U1083	1	2078172	1438	M2	0.971028971028971	SigB	0.971028971028971	tcatagaacgaaatcaaataacacactactttctgcattttaaattATGTTTAAgaataaaaattatGTTTATATAaatatatatactactttgaaaggtg	UA12	UB7	UC3	2078172	2079424	2079424	NA		SAOUHSC_02244
U1084	-1	2081676	198	M3	0.995004995004995	SigA	1	atagaaatgttactgatgtgtattactaacagGCGTTGACTAattcttttaaTATTTTATAATTGAAAATGAatatcaattgaaaaacaaaaggatgatat	UA25	UB14	UC1	2081676	2079840	2079840	fhuD1, NA		SAOUHSC_02246, SAOUHSC_02245
U1085	1	2081752	356	M4	0.977022977022977	SigA	0.999000999000999	aattagtcaacgcctgttagtaatacacatcagTAACATTTCtattttcattTATGATATTATCTAATTATtaatttataatataaaggagtatgaaatta	UA259	UB1	UC1	2081752	2083130	2083130	NA		SAOUHSC_02247
U1086	-1	2085263	1392	M2	0.994005994005994	SigB	0.994005994005994	ctaatcatactgtgattgtggatgatataccgttagaagattatgagTCAATTAggtttttataaattGGGTATATAttttatggtgttgccagtatttat	UA12	UB7	UC3	2085263	2083665	2083665	S868, NA, S867, NA, S866, S865		new_2084942_2085258_-1, SAOUHSC_02249, new_2084399_2084503_-1, SAOUHSC_02248, new_2083826_2083954_-1, new_2083618_2083824_-1
U1087	-1	2088811	116	M3	0.997002997002997	SigA	0.999000999000999	taaataacttgaagttacaaaacttaattaaaaggttatGACTTGAAATtttgaccaaatTTGATTATTATAAATGTATGttagcactctttaatgttaag	UA283	UB63	UC1	2088811	2086776	2086776	groES, S869, groEL		SAOUHSC_02255, new_2088377_2088451_-1, SAOUHSC_02254
U1088	1	2088873	558	M4	0.556443556443556	SigA	1	tttggtcaaaatttcaagtcataaccttttaattaagttTTGTAACttcaagttattTACGATAAAATAAATTATAAacaaatatttggaggaaaattatg	UA3	UB1	UC1	2088873	2089641	2089641	NA		SAOUHSC_02256
U1089	-1	2090669	1053	M3	0.715284715284715	SigA	0.776223776223776	tcaaacgggtaatgaaggaacaggttcgaaTAGTCGTGATgctaatcctgatTCGAATAATGTGAAGCCAGActcaaacaaccaaaacccaagtacagatt	UA284	UB40	UC5	2090669	2089700	2089700
U1090	-1	2090992	1054	M3	0.962037962037962	SigA	0.998001998001998	aaaatttcaagaatattaatattcattttcaaattccaaataTAAATGCATTttcaacgcataTTTATTATACTTAGATTAATacttacatgaaaaaggga	UA284	UB40	UC5	2090992	2089717	2089700	sdrH		SAOUHSC_02257
U1091	1	2091090	262	M3	0.998001998001998	SigA	1	aatattaatattcttgaaattttcgtaaatatTGCTTTACAAgtacgagtataAATTTTATACTTAGTCTATTaagtattctttactaaagaaggagcaat	UA10	UB1	UC1	2091090	2092072	2092905	NA	NA	SAOUHSC_02258	SAOUHSC_02259
U1092	1	2092088	257	M3	0.872127872127872	SigA	0.999000999000999	cctaggactttgattttatgtcttgtgctcgtTTTTTGCGTTtcaacataactTTTAGTAAGTTATATATAAGatctatcaaggatgtgatgttatgaaag	UA135	UB1	UC1	2092088	2092922	2092922	NA		SAOUHSC_02259
U1093	1	2093659	27	M1	0.901098901098901	NM	0.902097902097902	ccttaattaagataaaaattcttaaaattaaacaactcatcaactattttccatcacatctctgtgaTCTagttatattaaaacatgctaaaagcatttat	UA39	UB22	UC8	-1	-1	-1
U1094	-1	2093694	1267	M4	0.738261738261738	SigA	0.904095904095904	cataaaaaaatttacagttaagaataaaaaacgactagttaagaaaaattggaaaataaatgcttttagCATGTTTTAATATAACTAGatcacagagatgt	UA198	UB3	UC3	2093694	2090686	2089717	hld, S871, S870, sdrH		SAOUHSC_02260, new_2093169_2093503_-1, new_2090994_2093167_-1, SAOUHSC_02257
U1095	1	2093760	607	M4	0.948051948051948	SigA	1	tttccaatttttcttaactagtcgttttttattCTTAACTGtaaattttttTATGTTAAAATATTAAATAcaaattacatttaacagttaagtatttattt	UA3	UB1	UC1	2093760	2096611	2097206	agrB, agrD, S872, agrC, S873, agrA	NA, S875, S876	SAOUHSC_02261, SAOUHSC_02262, new_2094581_2094652_1, SAOUHSC_02264, new_2095898_2096005_1, SAOUHSC_02265	SAOUHSC_02266, new_2096812_2096960_1, new_2096962_2097246_1
U1096	1	2093833	1304	M3	0.854145854145854	SigA	0.937062937062937	attacatttaacagttaagtatttatttcctacagttaggcaatATAATGATAAaagattgtactaAATCGTATAATGACAGTGAGgagagtggtgtaaaa	UA92	UB3	UC3	2093833	2097206	2097206	agrB, agrD, S872, agrC, S873, agrA, NA, S875, S876		SAOUHSC_02261, SAOUHSC_02262, new_2094581_2094652_1, SAOUHSC_02264, new_2095898_2096005_1, SAOUHSC_02265, SAOUHSC_02266, new_2096812_2096960_1, new_2096962_2097246_1
U1097	-1	2093882	28	M1	0.919080919080919	NM	0.935064935064935	atgatctaagttatttctcttttgaagatacgtggcaAACTggtcaattttaTTATCaaaataattcaattttacaccactctcctcactgtcattatacg	UA231	UB22	UC8	-1	-1	-1
U1098	-1	2096823	46	M3	0.915084915084915	SigA	0.992007992007992	tcaatttcaaatttagtatattttgttaaaaattgcgccataGGATTGTAGAgtgaaatagaaATTGATAAATTATGTAGTAAtaggaataggtatacaaa	UA43	UB25	UC7	2096823	2096653	2096653	S874		new_2096610_2096806_-1
U1099	-1	2100581	1179	M4	0.771228771228771	SigA	1	tattttgaaatctttttatgaaagaagcagaaatattatTTAAagcggttacacaTATGCTAAAATAAGGCTAAgtgtcacaaataatgataggtgaataa	UA9	UB6	UC4	2100581	2097010	2097010	scrR, S877, scrB, NA		SAOUHSC_02269, new_2099440_2099587_-1, SAOUHSC_02268, SAOUHSC_02267
U1100	-1	2102008	1105	M3	0.975024975024975	SigA	0.991008991008991	gtgtggcacattttattccaaaagatgtaataaaacttaacgcaTTTTTGCTTTttataaattgtCAGATTATTATGAAAAAAAGggagtggtaagtatga	UA285	UB51	UC5	2102008	2101651	2101651	nrgA		SAOUHSC_02270
U1101	-1	2103589	99	M3	0.999000999000999	SigA	1	tatatgaatataatataaatatcaaaaatattgtgtataAGGTTGAAAAcaagaaaatcaTCACCTATAATACATACTAAacttatcggaaatgagaggtt	UA37	UB20	UC1	2103589	2102229	2102229	S878, NA, NA		new_2103450_2103589_-1, SAOUHSC_02272, SAOUHSC_02271
U1102	-1	2104592	819	M3	0.999000999000999	SigA	1	gtataaaacgccgtcttgaaactaagATATTTATTTttaaaattcaaTAATGTATAATATTTAGGTAttcattgtaatcaattatttgttttttaataatc	UA3	UB1	UC1	2104592	2103810	2103810	S880, rex		new_2104482_2104592_-1, SAOUHSC_02273
U1103	1	2104660	718	M3	0.764235764235764	SigA	0.997002997002997	acattattgaattttaaaaataaatatctTAGTTTCAAGacggcgttttaTACTGTAAAATGGTTATTAAtgtaataattacgacttgtttcataagttaa	UA3	UB1	UC1	2104660	2106641	2106641	vga		SAOUHSC_02274
U1104	-1	2104762	1213	M3	0.986013986013986	SigA	0.996003996003996	tcaccagtttttacttcaaaatcaacatcagtaaatatATCTTCACCAtcgaacgatttTGATATATGATTGAGTTGTAaaagtatcattcgatcttcacc	UA130	UB6	UC4	2104762	2103810	2103810	S881, S880, rex		new_2104594_2104762_-1, new_2104482_2104592_-1, SAOUHSC_02273
U1105	1	2106981	359	M3	0.966033966033966	SigA	0.996003996003996	cattgtttttatcaaaattcattgttaagacattttcTTTATGAAATaataataatatTGAAGTATATTTTTATTATTattaaaaataaataaggggatac	UA259	UB1	UC1	2106981	2107525	2107525	NA		SAOUHSC_02276
U1106	-1	2111388	693	M4	0.965034965034965	SigA	1	cttacaattaactttgaatagataatctgtttcaaagatAAGAAATTtaagttgaaaTTTGTTACAATATAAAGGTtaaatataaagttagatacgattga	UA3	UB1	UC1	2111388	2108740	2108740	S882, NA, NA, rimI, gcp		new_2111269_2111388_-1, SAOUHSC_02280, SAOUHSC_02279, SAOUHSC_02278, SAOUHSC_02277
U1107	1	2111487	1096	M3	0.998001998001998	SigA	1	tctattcaaagttaattgtaagaaaatttaaaatatTTGTTGACATactaaagcagaTATAGTAAATTAAATTTATCaaatttttagacaattctaactat	UA7	UB5	UC5	2111487	2122519	2122519	S883, S884, ilvD, ilvB, ilvH, S885, ilvC, leuA, leuB, leuC, leuD, ilvA		new_2111489_2111716_1, new_2111718_2111805_1, SAOUHSC_02281, SAOUHSC_02282, SAOUHSC_02283, new_2115546_2115681_1, SAOUHSC_02284, SAOUHSC_02285, SAOUHSC_02286, SAOUHSC_02287, SAOUHSC_02288, SAOUHSC_02289
U1108	-1	2111630	82	M4	0.433566433566434	SigA	0.552447552447552	cattcaaacagaaataggacttaaagcgtttagtaaatatttactaacgttcgagtcctaaagagTATAATAAAATAATAatatttgaagttgtcggttga	UA139	UB46	UC1	-1	-1	-1
U1109	-1	2128307	941	M3	0.999000999000999	SigA	1	tgataacacaaattaatttaatgtaaaaaaacgattaaaagTTATTGACAAatatttttaaaCATAATATAATAAATAACGTtctgaaaaacgaagatgtt	UA103	UB38	UC1	2128307	2126046	2126046	NA, NA, S886		SAOUHSC_02294, SAOUHSC_T00034, new_2125993_2126399_-1
U1110	-1	2128498	394	M3	0.997002997002997	SigA	0.998001998001998	tttcatgacattttgattgaacttttCTATTGACTGtacagcttataGTTAGTATGATTAAACACGTtccttaaaaaagaacaaattaaataaactttgat	UA20	UB1	UC1	2128498	2126029	2126029	S887, NA, NA, S886		new_2128324_2128494_-1, SAOUHSC_02294, SAOUHSC_T00034, new_2125993_2126399_-1
U1111	-1	2131539	474	M4	0.923076923076923	SigA	1	tgttttggaagtgaaaattacattaagtatcatatcttaatagaagtattttagaaTATGTTAAAATAAATGAGTaaatttaagaaaaagtgtgggttaag	UA3	UB1	UC1	2131539	2128766	2128766	NA, NA, S888		SAOUHSC_02297, SAOUHSC_02296, new_2128757_2128896_-1
U1112	-1	2135521	898	M3	0.925074925074925	SigA	1	gttttgtaacaaatgaattgttaaaataATATGGTCAGtgcatataaaaTTTGTTATCATTAGAGTAATtaaaggtcatttaataacttttggaatcaatt	UA75	UB1	UC1	2135521	2128800	2128800	NA, NA, S891, NA, rsbU, S890, rsbV, rsbW, sigB, S889, NA, NA, S888		SAOUHSC_02304, SAOUHSC_02303, new_2134654_2134938_-1, SAOUHSC_02302, SAOUHSC_02301, new_2133482_2133599_-1, SAOUHSC_02300, SAOUHSC_02299, SAOUHSC_02298, new_2131541_2131867_-1, SAOUHSC_02297, SAOUHSC_02296, new_2128757_2128896_-1
U1113	-1	2139729	703	M4	0.997002997002997	SigA	0.998001998001998	tttagatgtacctttaggaagaataaattagcatgaaatattccaTATGCTATAATTATCATCAtataaaaataaaatgaaatagattataaatccgtata	UA3	UB1	UC1	2139729	2131911	2128800	S892, NA, NA, NA, acpS, alr, NA, NA, S891, NA, rsbU, S890, rsbV, rsbW, sigB	S889, NA, NA, S888	new_2139664_2139731_-1, SAOUHSC_02309, SAOUHSC_02308, SAOUHSC_02307, SAOUHSC_02306, SAOUHSC_02305, SAOUHSC_02304, SAOUHSC_02303, new_2134654_2134938_-1, SAOUHSC_02302, SAOUHSC_02301, new_2133482_2133599_-1, SAOUHSC_02300, SAOUHSC_02299, SAOUHSC_02298	new_2131541_2131867_-1, SAOUHSC_02297, SAOUHSC_02296, new_2128757_2128896_-1
U1114	-1	2144304	65	M4	0.762237762237762	SigA	0.982017982017982	atttcttaataactaagtttgaaaattaaTATTTCTctcataaacaaGTTGTTACGATGTTGTTGTgttgtaaggaggttatggcaatgctcatcgtttta	UA35	UB19	UC7	2144304	2139884	2139884	NA, kdpA, S893, kdpB, kdpC		SAOUHSC_02313, SAOUHSC_02312, new_2142426_2142497_-1, SAOUHSC_02311, SAOUHSC_02310
U1115	1	2144415	63	M3	0.726273726273726	SigA	0.999000999000999	attaagaaatcattaagatgtgtatgcagaaataaattTTATAGCATTtaattgtgaagAATATTATGATATTGCTATCgaggtgaaggttatgtcaaaca	UA35	UB19	UC7	2144415	2147798	2147798	kdpD, kdpE		SAOUHSC_02314, SAOUHSC_02315
U1116	1	2149736	17	M1	0.966033966033966	NM	0.984015984015984	aaaattttgcaaaataattctcctttttacctgtttatttctcaaTatacttttgcatataagttcattaatatttcatcaacttctatatagtaccacca	UA72	UB22	UC8	-1	-1	-1
U1117	-1	2149769	772	M3	0.967032967032967	SigA	1	taatgtgattctaataaatattcgcaaattgctTTATTGCGATtaaatttttttGGTGGTACTATATAGAAGTTgatgaaatattaatgaacttatatgca	UA3	UB1	UC1	2149769	2148180	2148180	S894, cshA		new_2149688_2149769_-1, SAOUHSC_02316
U1118	-1	2152757	721	M4	0.985014985014985	SigA	1	atcaacatagatacagacacataagtcctcgtttttaaaATGCAAAATagcattaaaaTGTGATACTATTAAGATTCaaagatgcgaataaatcaattaac	UA3	UB1	UC1	2152757	2148248	2148180	S897, ddl, murF, S896, S895, S894, cshA		new_2152648_2152757_-1, SAOUHSC_02318, SAOUHSC_02317, new_2150135_2150203_-1, new_2149771_2150133_-1, new_2149688_2149769_-1, SAOUHSC_02316
U1119	-1	2152855	294	M3	0.993006993006993	SigA	0.998001998001998	ttttaaaaattagctagaatatcacagtgatatcagCTATAGATTTcaatttgaattAGGAATAAAATAGAAGGGAAtattgttctgattataaatgaatc	UA1	UB1	UC1	2152855	2152770	2148180		S897, ddl, murF, S896, S895, S894, cshA		new_2152648_2152757_-1, SAOUHSC_02318, SAOUHSC_02317, new_2150135_2150203_-1, new_2149771_2150133_-1, new_2149688_2149769_-1, SAOUHSC_02316
U1120	1	2152918	821	M3	1	SigA	1	taattcaaattgaaatctatagctgatatcactgtgataTTCTAGCTAAtttttaaaaagTCATGTAAAATTGATATAAAcattagtgagtataaaaggag	UA3	UB1	UC1	2152918	2154258	2154258	NA, S898		SAOUHSC_02319, new_2154168_2154293_1
U1121	-1	2152940	926	M3	0.885114885114885	SigA	0.905094905094905	atgcttatccggctgttgacgagatgaataatTCATTGCAAActccttttataCTCACTAATGTTTATATCAAttttacatgactttttaaaaattagcta	UA166	UB1	UC1	-1	-1	-1
U1122	-1	2154606	1466	M3	0.351648351648352	SigA	0.654345654345654	aattttgaaaataaattaaaaattttgtaaatgatGTAGTAAAggtatgtcgaaTAGGGTAAGATAATATTGAaagcgatccaaacgaggtgataataatg	UA27	UB7	UC3	2154606	2154351	2154351	NA		SAOUHSC_02320
U1123	-1	2154657	1456	M2	0.937062937062937	SigB	0.937062937062937	AGGATACAaaattgtattttaGGGTATAATgtagagtgcgctatagattttaattttgaaaataaattaaaaattttgtaaatgatgtagtaaaggtatgt	UA286	UB7	UC3	2154657	2154351	2154351	NA		SAOUHSC_02320
U1124	-1	2155255	1247	M3	0.825174825174825	SigA	0.954045954045954	caatttaaatatcatgacaatttagtttgaaaaacacactttGTGTTGACGTtgtgttttatgGGATATAGTATAGTAAGGAAtgtaaatgaaggagtgaa	UA287	UB43	UC3	2155255	2154351	2154351	NA, NA, NA		SAOUHSC_02322, SAOUHSC_02321, SAOUHSC_02320
U1125	1	2155322	531	M3	0.616383616383616	SigA	1	caacgtcaacacaaagtgtgtttttcaaactaaattGTCATGATATttaaattgcttCATGATACAATTAATAAGATatactactcgtttaagattttcga	UA3	UB1	UC1	2155322	2158134	2158134	cls2, NA, S899		SAOUHSC_02323, SAOUHSC_02324, new_2157536_2158194_1
U1126	-1	2159263	804	M3	0.523476523476524	SigA	0.999000999000999	gatttttttaataattagttaaatttttccacttatTGTTTCATACgtactcattaaTGTGATAGAATAAATCCTATgtgaatataatgatagaggtggaa	UA3	UB1	UC1	2159263	2158346	2158346	oxaI		SAOUHSC_02327
U1127	-1	2162441	1251	M3	0.885114885114885	SigA	0.999000999000999	atttaaagataataatacaactgagcaacaaTAATTGAAAAtgttgaaaccgTTTGCTAAGATTAATTTGCAattgaatactaaggaactactaggggagc	UA288	UB78	UC3	2162441	2158346	2158346	NA, S900, tenA, NA, thiM, thiE, oxaI		SAOUHSC_02332, new_2162264_2162335_-1, SAOUHSC_02331, SAOUHSC_02330, SAOUHSC_02329, SAOUHSC_02328, SAOUHSC_02327
U1128	1	2162486	34	M3	0.958041958041958	SigA	0.978021978021978	caattgcaaattaatcttagcaaacggtttcaaCATTTTCAATtattgttgctcAGTTGTATTATTATCTTTAAataataattctataatgacatatattt	UA289	UB79	UC18	-1	-1	-1
U1129	-1	2163376	381	M4	0.783216783216783	SigA	0.926073926073926	gtgtaaaaaacaaggctatttttttattttgttgtaacctgcacggattttataGATGTTACAGTAGTCTCTGtaaaacttttagagaaacaaattacttg	UA290	UB1	UC1	2163376	2162630	2162630	sceD		SAOUHSC_02333
U1130	-1	2164143	1205	M3	0.994005994005994	SigA	0.999000999000999	aataacgagatgctatagctattaattatataaaatttgccATTTTGACCAtttttaagctaGTAATTAAGATATAGGCATAggaggtgaatcacacacta	UA291	UB6	UC4	2164143	2163633	2163633	NA, S901		SAOUHSC_02334, new_2163599_2163705_-1
U1131	1	2164218	280	M3	0.6003996003996	SigA	0.992007992007992	aaaatggcaaattttatataatTAATAGCTATagcatctcgttaTTTGTTATATTTAAAGAAATtagtcatgaaatgaccttaaatcttctaaataattca	UA99	UB1	UC1	2164218	2164713	2164713	ywpF		SAOUHSC_02335
U1132	-1	2166937	915	M2	0.986013986013986	SigB	0.986013986013986	atgtaaaaagaattatatagtaagtTAGCTTAAactttactaaaaacGGGTATTAAactttgtatcattatttaaatttttcatgtacaatgtaatacagt	UA147	UB1	UC1	2166937	2164772	2164772	NA, S902, murA1, fabZ		SAOUHSC_02338, new_2166534_2166643_-1, SAOUHSC_02337, SAOUHSC_02336
U1133	-1	2178168	446	M4	0.742257742257742	SigA	0.996003996003996	aaaagatattatttgctagtaggaattctgtataattagtatatgttaacagttaaaTAAGTTATAATAGAGGAGTgtagcactttgctatattccttttt	UA93	UB1	UC1	2178168	2167441	2167441	S905, NA, glyA, upp, mnaA, NA, atpB, atpE, S904, atpF, atpH, atpA, S903, atpG, atpD, atpC		new_2178104_2178168_-1, SAOUHSC_02355, SAOUHSC_02354, SAOUHSC_02353, SAOUHSC_02352, SAOUHSC_02351, SAOUHSC_02350, SAOUHSC_02349, new_2172785_2172981_-1, SAOUHSC_02347, SAOUHSC_02346, SAOUHSC_02345, new_2170095_2170193_-1, SAOUHSC_02343, SAOUHSC_02341, SAOUHSC_02340
U1134	-1	2179715	1167	M3	0.83016983016983	SigA	0.992007992007992	tcgtctcatttaaatggtaattagaagttatgcctttgctatgattagtTAAGTGCATAgctttttgcttTATATTATGATAAATAAGAAaggcgtgatta	UA194	UB53	UC4	2179715	2178185	2167441	NA, ptpB	S905, NA, glyA, upp, mnaA, NA, atpB, atpE, S904, atpF, atpH, atpA, S903, atpG, atpD, atpC	SAOUHSC_02357, SAOUHSC_02356	new_2178104_2178168_-1, SAOUHSC_02355, SAOUHSC_02354, SAOUHSC_02353, SAOUHSC_02352, SAOUHSC_02351, SAOUHSC_02350, SAOUHSC_02349, new_2172785_2172981_-1, SAOUHSC_02347, SAOUHSC_02346, SAOUHSC_02345, new_2170095_2170193_-1, SAOUHSC_02343, SAOUHSC_02341, SAOUHSC_02340
U1135	-1	2182297	651	M4	0.703296703296703	SigA	0.999000999000999	ttgttcatgtacaatatcgatataattatgaaaaagacatttatgaatatttgaaaTATGATATAATAAAGCGATtatgttttgaaaaaggtggaactctc	UA3	UB1	UC1	2182297	2167458	2167441	tdk, prfA, S906, NA, NA, ptpB, S905, NA, glyA, upp, mnaA, NA, atpB, atpE, S904, atpF, atpH, atpA, S903, atpG, atpD, atpC		SAOUHSC_02360, SAOUHSC_02359, new_2180509_2180578_-1, SAOUHSC_02358, SAOUHSC_02357, SAOUHSC_02356, new_2178104_2178168_-1, SAOUHSC_02355, SAOUHSC_02354, SAOUHSC_02353, SAOUHSC_02352, SAOUHSC_02351, SAOUHSC_02350, SAOUHSC_02349, new_2172785_2172981_-1, SAOUHSC_02347, SAOUHSC_02346, SAOUHSC_02345, new_2170095_2170193_-1, SAOUHSC_02343, SAOUHSC_02341, SAOUHSC_02340
U1136	-1	2184418	652	M3	0.793206793206793	SigA	1	tgtactgttttaattttgcaatttttataaatagATTTTGTAATtaaaataaaaaTTTGCTATAGTTATTCATGTatttaaaaggttggggattagcataa	UA3	UB1	UC1	2184418	2182469	2182469	S908, rho, S907, rpmE2		new_2184291_2184418_-1, SAOUHSC_02362, new_2182857_2182973_-1, SAOUHSC_02361
U1137	-1	2186015	1436	M2	1	SigB	1	attttattttgaacatattaaaagggagcgtatcataatggaatgtaATGTTTATatcgtatgcattacGGATAAATAatatataaatcattcttgaggag	UA12	UB7	UC3	2186015	2184492	2184492	NA		SAOUHSC_02363
U1138	-1	2187943	483	M3	0.997002997002997	SigA	1	aaatagaaagacaagattttaacgattaaaataaacTATTTTACAAataaagtaaaatTAATTTATAATGCTAATAATgcaaaaaattaaaaagtaatgga	UA3	UB1	UC1	2187943	2186192	2186192	murA2, S909, NA		SAOUHSC_02365, new_2186538_2186625_-1, SAOUHSC_02364
U1139	-1	2188198	295	M4	0.755244755244755	SigA	1	aagtaataaataaaacagtttgattttaaaatgaaagcgtaaaaatggtaaaatatatcaaaattgatTGTGATATAATTATAAGGAaaatgagcaattta	UA1	UB1	UC1	2188198	2186192	2186192	S910, murA2, S909, NA		new_2187945_2188198_-1, SAOUHSC_02365, new_2186538_2186625_-1, SAOUHSC_02364
U1140	-1	2189266	242	M3	0.725274725274725	SigA	1	atcgcatttttcaaaaaatacacatttaatctgcagtattTCAATGCATTgacgctattttTTTGATATAATTACTTTGAAaaatacgtgcgtaagcactc	UA155	UB1	UC1	2189266	2186226	2186192	fbaA, S911, S910, murA2, S909, NA		SAOUHSC_02366, new_2188200_2188289_-1, new_2187945_2188198_-1, SAOUHSC_02365, new_2186538_2186625_-1, SAOUHSC_02364
U1141	1	2189393	605	M3	1	SigA	1	actaaatgcaaacgtatacatttttatacaatttaagCCGTTGCATAatatgtagtcaTTAATTACAATATTTTATAAgtagattggaggataaagatgtc	UA3	UB1	UC1	2189393	2189992	2189992	NA		SAOUHSC_02367
U1142	-1	2192612	736	M3	0.989010989010989	SigA	1	ttttcgaaaaatatttaaattactaacagTGATTGCGAAatatgatattgTCATTTATAATTTAGTTTTGttactatatataaatgaattcagacgtataa	UA3	UB1	UC1	2192612	2190068	2190068	S914, rpoE, S913, pyrG		new_2192536_2192612_-1, SAOUHSC_02369, new_2191670_2191961_-1, SAOUHSC_02368
U1143	-1	2193567	463	M3	0.959040959040959	SigA	0.994005994005994	ttaaaaaatataaataagtaatttatttaacttagagcaaaTAATGGTATCgtagtgaaataATAGGTAAAATAATATGGGGattcatgcttcatatataa	UA3	UB1	UC1	2193567	2192057	2190068	NA, S914, rpoE	S913, pyrG	SAOUHSC_02370, new_2192536_2192612_-1, SAOUHSC_02369	new_2191670_2191961_-1, SAOUHSC_02368
U1144	1	2193884	796	M3	0.591408591408591	SigA	0.998001998001998	aatgcaatggcatcaaatttgttaataattactattatTACTTGTTttttagtcatttTACTATACTATTATTTAAGGatagacattaataatgaggtggg	UA3	UB1	UC1	2193884	2194718	2194718	coaA		SAOUHSC_02371
U1145	-1	2195576	753	M3	0.999000999000999	SigA	0.999000999000999	aacatgacattaaattgaattcataatatgtcTAATTGACTAacttgttggagTCATTTACTATTTTATGTATgacatattttaaaaagtgagggtcaagc	UA3	UB1	UC1	2195576	2194811	2194811	NA, S915		SAOUHSC_02372, new_2194765_2194863_-1
U1146	-1	2198388	269	M3	0.995004995004995	SigA	0.997002997002997	tagaaaattttgtaaataaagaaaaacTAGATGACATcatgagataaaACCGATAGAATAAGTAATAAttcattttgaaagaacaaaatattgtggatgat	UA10	UB1	UC1	2198388	2194811	2194811	S917, hmrA, NA, S916, NA, S915		new_2198312_2198388_-1, SAOUHSC_02374, SAOUHSC_02373, new_2195578_2195933_-1, SAOUHSC_02372, new_2194765_2194863_-1
U1147	1	2198509	779	M3	0.717282717282717	SigA	1	ataactaaaagcctttcataaatttataaaacagtttcAAATTGTAAAacataagccctATTGTTACAATTTAAGTATTgttagaaacacaacttacaaca	UA3	UB1	UC1	2198509	2199087	2199087	S918, luxS		new_2198509_2198621_1, SAOUHSC_02375
U1148	-1	2202093	1273	M3	0.992007992007992	SigA	1	tccttaatattcattaataattttaagataacatTTGTTTCCCTtttttgcgaatTTTTGTACTATAGAATTAAAgaattataaaaatataatcctgatta	UA207	UB3	UC3	2202093	2199248	2199248	S920, deoC2, S919, pdp, NA		new_2201851_2202093_-1, SAOUHSC_02379, new_2200910_2201187_-1, SAOUHSC_02377, SAOUHSC_02376
U1149	1	2202122	829	M3	0.658341658341658	SigA	0.993006993006993	ttatatttttataattctttaattctatagtacaaaAATTCGCAAAaaagggaaacaAATGTTATCTTAAAATTATTaatgaatattaaggagaagataac	UA3	UB1	UC1	2202122	2202912	2202912	deoD		SAOUHSC_02380
U1150	-1	2202138	9	M1	0.813186813186813	NM	0.819180819180819	catttggttgaatatgtggtgtaccttttgtcatttgttaTCTTCTCcttaatattcATTAAtaattttaagataacatttgtttcccttttttgcgaatt	UA292	UB22	UC8	2202138	2199248	2199248	S920, deoC2, S919, pdp, NA		new_2201851_2202093_-1, SAOUHSC_02379, new_2200910_2201187_-1, SAOUHSC_02377, SAOUHSC_02376
U1151	1	2203490	8	M3	0.605394605394605	SigA	0.97002997002997	gattactcatatttaatacactccttaaaattgtctacgtctTGCTTGtttatattaattaTTATATTATAATAATTCTAAtctgtaaagtgtttttactc	UA91	UB39	UC8	2203490	2203915	2203915
U1152	-1	2203500	1360	M3	0.977022977022977	SigA	1	acgattagattagaataattataaaaaagagagtaaaaaCACTTTACAGattagaattatTATAATATAATAATTAATATaaacaagcaagacgtagacaa	UA266	UB7	UC3	2203500	2202104	2199248	dps, S921	S920, deoC2, S919, pdp, NA	SAOUHSC_02381, new_2202140_2202943_-1	new_2201851_2202093_-1, SAOUHSC_02379, new_2200910_2201187_-1, SAOUHSC_02377, SAOUHSC_02376
U1153	-1	2204099	1330	M2	0.999000999000999	SigB	0.999000999000999	ttttatggcaatttcgtgtcgcgaggacttatcaagtgacaaccTTGTTTAAatgtttttaaattAGGAAAAATgactataagtactattaaaggagcgaa	UA13	UB8	UC3	2204099	2202988	2199248	NA, S922, dps	S921, S920, deoC2, S919, pdp, NA	SAOUHSC_02382, new_2203502_2203638_-1, SAOUHSC_02381	new_2202140_2202943_-1, new_2201851_2202093_-1, SAOUHSC_02379, new_2200910_2201187_-1, SAOUHSC_02377, SAOUHSC_02376
U1154	-1	2206216	492	M4	0.982017982017982	SigA	1	tgcatagtgtatgcaagcatgttttttatatgcaaaataggtagctaaaTATGTTAAACTGTTTGTAAcaatttttatcattaagacagatataataaata	UA3	UB1	UC1	2206216	2204450	2204450	S924, NA, S923		new_2205884_2206216_-1, SAOUHSC_02383, new_2204416_2204509_-1
U1155	-1	2208024	372	M3	0.716283716283716	SigA	0.996003996003996	tacaaagaatttgaacaatgtatggcacAACTATTAAAgttgtttattaATTGGTATAATGGGCGAGTAaatttaaagggaaatatgtacaaatgtaagag	UA60	UB1	UC1	2208024	2206235	2205980	S926, NA, manA, NA, S925	S924	new_2207834_2208024_-1, SAOUHSC_02386, SAOUHSC_02385, SAOUHSC_02384, new_2206447_2206554_-1	new_2205884_2206216_-1
U1156	1	2208794	103	M3	0.796203796203796	SigA	0.974025974025974	tttaacgcattaagttgatcTGATTGCCTAacaccagcagtaAATGGTACATTTTCTTTTGCtaattgttgcactagtaacgaacctacaccgccattagc	UA293	UB42	UC1	-1	-1	-1
U1157	-1	2208894	1400	M2	0.999000999000999	SigB	0.999000999000999	tcccagtagtatgtcaattgatttttatagttgtaacAAGTTTTAcatatctcataaagTGGTATGGCatagagaataataaataggagagtgttgtaaat	UA12	UB7	UC3	2208894	2206490	2205980	NA, S927, S926, NA, manA, NA, S925	S924	SAOUHSC_02387, new_2208026_2208147_-1, new_2207834_2208024_-1, SAOUHSC_02386, SAOUHSC_02385, SAOUHSC_02384, new_2206447_2206554_-1	new_2205884_2206216_-1
U1158	1	2208963	1046	M3	0.984015984015984	SigA	0.998001998001998	agatatgtaaaacttgttacaactataaaaatCAATTGACATactactgggaaCGTATTAAATTAATATATGAacaaatattcatatgaaaggattgtcat	UA294	UB40	UC5	2208963	2210290	2210290	czrA, czrB		SAOUHSC_02388, SAOUHSC_02389
U1159	1	2210532	296	M3	0.7002997002997	SigA	0.994005994005994	aattctctaactttagtCACTTTAATTaatttttattaGATATTAATATGAAAATAACgtgttttttgttattgtatttatatgaagaaaaggaggcacca	UA1	UB1	UC1	2210532	2211650	2211650	NA		SAOUHSC_02390
U1160	1	2211928	1145	M4	0.98001998001998	SigA	1	ctgctgtatggaaagttggttttattaattctgattatgttcagaaCTACAATTCataagaaaaaTGTGTTAAAATATATTTGTagcaagtagaagcaaaa	UA295	UB72	UC4	2211928	2212823	2212823	S929, S931		new_2211928_2212084_1, new_2212137_2212868_1
U1161	-1	2212290	1148	M4	0.914085914085914	SigA	1	ttatcgagttgattaagaaatgaaaaaacttatactatgaatTACTGTTtaaaagtgtgCATGTTATAATATTTATTGagcaagttggatagatggtggct	UA280	UB72	UC4	2212290	2211760	2211760	S932, NA, S930, S928		new_2212214_2212290_-1, SAOUHSC_02391, new_2211955_2212108_-1, new_2211724_2211953_-1
U1162	-1	2214723	314	M3	0.528471528471528	SigA	0.992007992007992	actataaaatcaaccggttcgtttacatatttCCCCAAtataatttactcTATAGTATACTTCAAATATatctactttaaattatcatctccatactattt	UA1	UB1	UC1	2214723	2212066	2211998	S934, NA, NA, S933, S932, NA	S930	new_2214037_2214718_-1, SAOUHSC_02393, SAOUHSC_02392, new_2212292_2212637_-1, new_2212214_2212290_-1, SAOUHSC_02391	new_2211955_2212108_-1
U1163	-1	2216879	1099	M4	0.915084915084915	SigA	1	aatgcgtaaaaatgaagtgttttatttatttaaatagtCTGACAATtaagggtgtTATGTTAATATGATTTTATgagaagtatggagtagcaataaagggg	UA7	UB5	UC5	2216879	2215092	2215092	NA, S935, NA		SAOUHSC_02397, new_2215980_2216046_-1, SAOUHSC_02396
U1164	-1	2219309	1161	M3	0.942057942057942	SigA	0.998001998001998	ttttaaaattttattgtgaaaaTATTTGCAAAacaaaacaacacCGTTGTACAATAATGATTAAtggaaagggggaaagttcggcagtacagttaaagcgc	UA296	UB53	UC4	2219309	2217047	2217047	S936, glmS		new_2218867_2219309_-1, SAOUHSC_02399
U1165	1	2219500	58	M3	0.996003996003996	SigA	0.999000999000999	attttgtcacatttattttgacaaagttgatttttgtttATATTGAGTAacaagtaacctCTCTATACACTATATATAGTcacatatattaaaaaagaggt	UA297	UB25	UC7	2219500	2224893	2224893	mtlF, NA, mtlA, mtlD, S937		SAOUHSC_02400, SAOUHSC_02401, SAOUHSC_02402, SAOUHSC_02403, new_2224805_2224939_1
U1166	1	2220833	1329	M2	0.997002997002997	SigB	0.997002997002997	tgttgatgcacacaattacaataatataaatcATGTTATTtttgcctgcgatgcGGGTATGGGttctagtgcaatgggtgcaagcatgttacgtaataaat	UA13	UB8	UC3	2220833	2222802	2224893	NA	mtlA, mtlD, S937	SAOUHSC_02401	SAOUHSC_02402, SAOUHSC_02403, new_2224805_2224939_1
U1167	1	2222816	1443	M2	0.999000999000999	SigB	0.999000999000999	aatcagaacaattattgcatcatatgcgttcGGGTTTAActttgcttgattcaGTGAAAATAgttagtaccgaagttaaacagtggcaaacatatatcgca	UA12	UB7	UC3	2222816	2224910	2224910	mtlA, mtlD, S937		SAOUHSC_02402, SAOUHSC_02403, new_2224805_2224939_1
U1168	-1	2235999	534	M3	0.96003996003996	SigA	0.999000999000999	aaataatttttttctatttaaatatatgttCGTATGACAGtgatgtaaatgATTGGTATAATGGGTATTATggaaaaatattacccggaggagatgttatg	UA3	UB1	UC1	2235999	2232840	2232840	NA, NA, glmM		SAOUHSC_02407, SAOUHSC_02406, SAOUHSC_02405
U1169	-1	2237090	1290	M3	0.999000999000999	SigA	1	aataagataaacagattatatgtgtagctatTGCTTGATAAtggtaagcgcaTACATTATTCTTTAATTACAtagagcaaagggggacgcttatgacaaag	UA36	UB3	UC3	2237090	2236172	2236172	rocF		SAOUHSC_02409
U1170	-1	2244638	937	M3	0.981018981018981	SigA	1	agaagcgggttgtgaacacaaaaagtttttaaaaaagTTATTGACTTtaaattccaaaGTTGATAATATGATAAAGTCgtcaaaaacgacgcagttgtttt	UA298	UB38	UC1	2244638	2244383	2244383	S938		new_2244357_2244538_-1
U1171	-1	2244731	399	M3	0.986013986013986	SigA	1	caaaattacttttattttgtacgtttttATGTTGATTTgttttggaatGCTGGTAAAATAAGTTCTTGtgttaagcaataaacgcgttgaaaaagaagcgg	UA20	UB1	UC1	2244731	2244264	2244264	NA, S938		SAOUHSC_02416, new_2244357_2244538_-1
U1172	-1	2245963	1008	M3	0.96003996003996	SigA	1	aattatagtagttggtctatttaaaataataggctaacTGCTTTTTTTatttaataaaaAGTTTTATACTTTTAGTGATagactaagcaaaaattgttatt	UA141	UB17	UC1	2245963	2244825	2244825	S940, NA, S939		new_2245820_2245964_-1, SAOUHSC_02417, new_2244782_2244931_-1
U1173	-1	2247698	1314	M2	0.993006993006993	SigB	0.993006993006993	acttctttttgttcaatagaagaatcgataatagTGAGTCTtagtgctcaatttgTGGTAAATAagttaaataaccattgtatgagtctgagacataaaat	UA299	UB13	UC3	2247698	2246049	2246049	S941, mdeA		new_2247470_2247698_-1, SAOUHSC_02418
U1174	-1	2252358	1013	M4	0.912087912087912	SigA	1	gtgtcatactaatgaattttaacccgaaaatatgtTCGTGTTTTtgttagggaTGTGGTAAAATGTGAGTATtaaaggagaacaaatatgacaggtaaaac	UA222	UB37	UC5	2252358	2246066	2246066	NA, NA, NA, S943, sdrM, S942, sepA, S941, mdeA		SAOUHSC_02424, SAOUHSC_02423, SAOUHSC_02422, new_2249707_2249882_-1, SAOUHSC_02420, new_2248265_2248362_-1, SAOUHSC_02419, new_2247470_2247698_-1, SAOUHSC_02418
U1175	1	2252461	1302	M3	1	SigA	1	aattcattagtatgacacaatttaaaaaagtatcacataaCTCTTGAAAAcgattacaaaaTCGTTTATGATGTATTTACAaaatatttaaaggatgtgtt	UA36	UB3	UC3	2252461	2252841	2252841	NA		SAOUHSC_02425
U1176	-1	2254402	395	M3	1	SigA	1	gtaattgtacttaaccttttttgaattcATCTTGAAAAattacaagaaaTAGCGTATATTTAATAACTGtaattattcattattttgcatacataaacatt	UA20	UB1	UC1	2254402	2252917	2252917	S945, NA		new_2254094_2254402_-1, SAOUHSC_02426
U1177	-1	2257541	189	M3	1	SigA	1	agtcatacattttagaaatataaaaaagattgaacgcTACTTGACAAtgataattgttATCAATAAAATAATAAATGAagttatacatattaaggagtgga	UA25	UB14	UC1	2257541	2254515	2254515	htsA, htsB, htsC		SAOUHSC_02430, SAOUHSC_02428, SAOUHSC_02427
U1178	-1	2260793	1386	M2	1	SigB	1	atgagtatatgtgcagatgtgtttggcaTTGTTAGAactttttcaataatGGGAATAAGtactatatgcattacaatggtattctattttataaatagaaa	UA12	UB7	UC3	2260793	2257898	2257898	NA, NA		SAOUHSC_02434, SAOUHSC_02433
U1179	1	2261816	1221	M4	0.795204795204795	SigA	0.928071928071928	ataatattggtacaagtctgcaaaaatTGACAATCCccagataaacTGCGTTATGATAAGTGGTAagtacaaaccaatttagccctatttgtccaatccaa	UA215	UB66	UC4	2261816	2264112	2264112	S947, NA, S948		new_2261817_2261942_1, SAOUHSC_02436, new_2263982_2264151_1
U1180	1	2261944	190	M3	0.999000999000999	SigA	1	ctaaaaaaatattttgtcataaaacttacacccgcattCTGTTGATAAtaagaatcattATCATTAATATGGATTATACaaatctatcttgcttttgtaaa	UA25	UB14	UC1	2261944	2264095	2264095	NA, S948		SAOUHSC_02436, new_2263982_2264151_1
U1181	-1	2261963	188	M3	1	SigA	1	aaattaagttcaagttcataattcacctctatgaaaTATTTTACAAaagcaagatagATTTGTATAATCCATATTAAtgataatgattcttattatcaaca	UA25	UB14	UC1	2261963	2257898	2257898	NA, NA, NA		SAOUHSC_02435, SAOUHSC_02434, SAOUHSC_02433
U1182	-1	2267598	1420	M2	0.999000999000999	SigB	0.999000999000999	tcttcaaaacatattgacgaaaattaattaataatgAGGTTTTAtttacaaaaactaGGGAATATAttactaaatggtacttcatcttatatattaaaaat	UA12	UB7	UC3	2267598	2266058	2266058	S949, NA, NA, asp23		new_2267458_2267598_-1, SAOUHSC_02443, SAOUHSC_02442, SAOUHSC_02441
U1183	-1	2269231	1037	M2	1	SigB	1	tgaggcattattaattgtgtctatataaaattacaaATGATTAAaatgttgcagttatGGGTATGAActtaccattacacagaaagggtttgtatttatga	UA154	UB10	UC5	2269231	2266058	2266058	opuD2, S949, NA, NA, asp23		SAOUHSC_02444, new_2267458_2267598_-1, SAOUHSC_02443, SAOUHSC_02442, SAOUHSC_02441
U1184	-1	2270546	135	M3	0.952047952047952	SigA	0.983016983016983	atttatatattcaaatgaaaaaggagtcatgatgctgcgaTATAAGCACAcatggcttctaTTTTGTATAATAAGAAATAAgttcataaatgaggtgaaac	UA300	UB26	UC1	2270546	2269509	2269509	NA		SAOUHSC_02445
U1185	-1	2272940	117	M3	0.985014985014985	SigA	0.986013986013986	caactttccaaagtcatcttaaaagttaatgatgtattcaaaatcaacTAAAGGACATttttaatcacaTCCTTTATACTTATATAAAAgacatgaatggg	UA301	UB63	UC1	2272940	2269526	2269526	NA, S951, NA, S950, NA		SAOUHSC_02448, new_2271738_2272019_-1, SAOUHSC_02447, new_2270571_2270735_-1, SAOUHSC_02445
U1186	-1	2279650	1253	M3	0.999000999000999	SigA	0.999000999000999	attgtttgaaaatacgtcataaacaaacatattataaacatattATGTTGATTTattgtttgtttATGTTTATAATTTAAACGTAatcaaattgaaagcct	UA302	UB54	UC3	-1	-1	-1
U1187	-1	2280729	308	M3	0.958041958041958	SigA	0.998001998001998	aatgaattatacatataatcgaacagttaaattaTATTAGTTTTtacgcaattttTATTATAGAATAAGCATGTAtattaaaattgatgtctaaacataaa	UA1	UB1	UC1	2280729	2279913	2279913	lacR		SAOUHSC_02456
U1188	1	2280845	1156	M3	0.733266733266733	SigA	1	tcatttttaaaaagaactgtttaaactgcgCTTTTGATAAtcgtaaaatgaaTATACTATAATAAAAGTAAAagacgttataaatcattcattattttgat	UA88	UB21	UC4	2280845	2281554	2281554	cobB		SAOUHSC_02457
U1189	-1	2284010	963	M2	0.552447552447552	SigB	0.552447552447552	ctttgggagagaaagtaaacctatggcttgctatagagttcgctccatGGTTTATAGTggacatacaagataaaggaggttcattttatgaatcatattga	UA120	UB33	UC1	2284010	2283143	2283143	NA		SAOUHSC_02460
U1190	-1	2284555	285	M3	0.869130869130869	SigA	0.996003996003996	agtaattaaaaacgatgaaatgtaaaatgttaaaAAAGAGACAAatttaaatttgAGTAATAAAATAAGAAGTATtcaaacgaagatgacaatatataaag	UA99	UB1	UC1	2284555	2283143	2283143	S955, NA, NA		new_2284470_2284554_-1, SAOUHSC_02461, SAOUHSC_02460
U1191	1	2284655	212	M4	0.803196803196803	SigA	0.998001998001998	atttcatcgtttttaattactttaaaaattgTATAACTtaaatatttaaAATGATATAATCACTAAGAttgataatatttaattttttgaaaattatttta	UA276	UB15	UC1	-1	-1	-1
U1192	1	2286688	1429	M2	0.955044955044955	SigB	0.955044955044955	tactgattcatcaaagaatccagttacaacgaTTGAAaatcgcaaagcgaatGGGTATACGttatatacagacgataaacaaacaaccaattctgataatc	UA12	UB7	UC3	2286688	2287283	2287283
U1193	-1	2289348	145	M3	0.997002997002997	SigA	0.997002997002997	tgactcgtgcattttgaaaagtggtaagcaatgttttTAGTTTATAGggattgattagTTGTATATAATAATCATGAAaagcatatagtcgatcttatact	UA205	UB26	UC1	2289348	2287376	2287376	NA, S956, NA		SAOUHSC_02465, new_2288215_2288424_-1, SAOUHSC_02464
U1194	1	2289479	1411	M2	0.97002997002997	SigB	0.97002997002997	taaaaactattactaaaaattaaaatataaaaaatgcaaaaagtATGTTTTAaactttatgaaacgTGTTATACAaatagtgtaatatcatacaacccgaa	UA12	UB7	UC3	2289479	2290139	2290139	NA, S957		SAOUHSC_02466, new_2289960_2290178_1
U1195	-1	2289501	24	M1	0.613386613386613	NM	0.617382617382617	tggcagtaacaaatgattttagtttcatatctcaaTCTccttttcgggttgtatGatattacactatttgtataacacgtttcataaagtttaaaacatac	UA39	UB22	UC8	-1	-1	-1
U1196	-1	2292897	111	M3	0.974025974025974	SigA	0.981018981018981	ctattcatgcatttttggaatacttagtattacaaataacGATTTTTATTcatctaacaaaGGTTATATAATGTACTGAAGgcaatttttatgtattacaa	UA303	UB64	UC1	2292897	2290215	2290215	S959, budB, budA1, S958		new_2292729_2292897_-1, SAOUHSC_02468, SAOUHSC_02467, new_2290190_2290322_-1
U1197	-1	2297610	1181	M3	0.989010989010989	SigA	1	ggcgtgttggatacagtaatatacaataccgatattaCAGTTACTAAcattccaaataAAGTATATAATTATATTGTGaatggcaagcctgctattgaatg	UA9	UB6	UC4	2297610	2293309	2293309	NA, NA, NA, S961, NA, S960, NA		SAOUHSC_02474, SAOUHSC_02473, SAOUHSC_02472, new_2295325_2295452_-1, SAOUHSC_02471, new_2293365_2293917_-1, SAOUHSC_02470
U1198	-1	2299123	77	M5	0.949050949050949	NM	0.972027972027972	aataaatagttgatattctgttatttttttggaagtgaagtgatttgaatactttactctaaacgataaaaggttaaaaaaacaacaaaaagaaaatatta	UA169	UB32	UC1	2299123	2299089	2299089
U1199	-1	2300370	767	M3	0.972027972027972	SigA	0.976023976023976	ttacaaaatgactgattgCCATTGACAAaaagcttgtgaAATTATAAGATTATTAACGGtattgttttatatccaccccacgataagccccggaaacttat	UA3	UB1	UC1	2300370	2299378	2299378	S962, rplM, rpsI		new_2300177_2300370_-1, SAOUHSC_02478, SAOUHSC_02477
U1200	-1	2303729	611	M3	0.963036963036963	SigA	0.998001998001998	gaaaatactagtaatatatagagaacccagtcaatgTCATATACAGcgatttataaaTATTGTAAAATATGATAGATacacgaatcgtaaaggagagagac	UA3	UB1	UC1	2303729	2300381	2299378	cbiO, cbiO, ecfT, truA	S962, rplM, rpsI	SAOUHSC_02483, SAOUHSC_02482, SAOUHSC_02481, SAOUHSC_02480	new_2300177_2300370_-1, SAOUHSC_02478, SAOUHSC_02477
U1201	-1	2318365	803	M3	1	SigA	1	ggtacgaatttacaataaagaaggaaataaaaaatatctcgaaaaTAGTTGAACTgactaagtataTAAAGTAAAATATAAAAGTAtgtgttagacagata	UA3	UB1	UC1	2318365	2304070	2304070	S967, rplC, rplD, rplW, rplB, S966, rpsS, rplV, rpsC, rplP, rpmC, rpsQ, rplN, rplX, rplE, rpsN, rpsH, rplF, rplR, rpsE, rpmD, rplO, secY, adk, S965, infA, rpmJ, rpsM, rpsK, rpoA, rplQ, S964		new_2317804_2318365_-1, SAOUHSC_02512, SAOUHSC_02511, SAOUHSC_02510, SAOUHSC_02509, new_2315284_2315349_-1, SAOUHSC_02508, SAOUHSC_02507, SAOUHSC_02506, SAOUHSC_02505, SAOUHSC_02504, SAOUHSC_02503, SAOUHSC_02502, SAOUHSC_02501, SAOUHSC_02500, SAOUHSC_02499, SAOUHSC_02498, SAOUHSC_02496, SAOUHSC_02495, SAOUHSC_02494, SAOUHSC_02493, SAOUHSC_02492, SAOUHSC_02491, SAOUHSC_02490, new_2306793_2306984_-…
U1202	1	2318450	1254	M3	0.928071928071928	SigA	0.981018981018981	tattttttatttccttctttattgtaaattcgtAccttgaaTCattttattattaTCATTAAAAATTATTCTATAtaattagtcataagaacggtggtgaa	UA302	UB54	UC3	2318450	2319022	2319022	NA, S968		SAOUHSC_02515, new_2318886_2319057_1
U1203	-1	2320449	842	M3	0.981018981018981	SigA	1	agttgaatcagaaaaacgaaaagttcgcttttgGTATTGTTTTttattaagaatGATATTAAACTATTAAGGTAttttaaaaaaaggagcatccattcgtg	UA3	UB1	UC1	2320449	2319081	2319081	S969, NA		new_2320256_2320449_-1, SAOUHSC_02516
U1204	-1	2322768	692	M4	0.991008991008991	SigA	1	ttttgttacttttattatatagtatttcaactgaaatgaaagttaatagtgatattaaCATGTTACAATACATTTAAcacatcatttgcaatcattgaatt	UA3	UB1	UC1	2322768	2319098	2319081	NA, topB, S969, NA		SAOUHSC_02518, SAOUHSC_02517, new_2320256_2320449_-1, SAOUHSC_02516
U1205	1	2322795	328	M3	0.933066933066933	SigA	0.992007992007992	tgattgcaaatgatgtgttaaatgtattgtaacatgttaatatcactattAACTTTCATTtcagttgaaaTACTATATAATAAAAGTAACaaaaagtacgg	UA1	UB1	UC1	2322795	2323731	2323731	NA		SAOUHSC_02519
U1206	1	2323856	805	M3	0.98001998001998	SigA	0.996003996003996	taaatattgaaaattataagtagttgTTTTTTACTAttagggcagaaTGCTTTACAATAACATGCAAgtgtcaattaaggggagcacttgcataaatagta	UA3	UB1	UC1	2323856	2325091	2325091	glcU, S970, S971		SAOUHSC_02520, new_2324778_2324964_1, new_2324966_2325124_1
U1207	-1	2323891	927	M3	0.932067932067932	SigA	0.935064935064935	gcaggtaaaagtgcgattaagaaatcaagAAATTGCAAGactactcactcTCCTATACTATTTATGCAAGtgctccccttaattgacacttgcatgttatt	UA166	UB1	UC1	-1	-1	-1
U1208	-1	2326153	879	M3	0.838161838161838	SigA	0.999000999000999	aattaagtgcatttaatgtagattatagcatgaaaCAGTAGACTTctaaaatatctgTGGAGTATGTTAAAGTTATAaattatgaagattattgaaagaag	UA75	UB1	UC1	2326153	2325201	2325201	S972, NA		new_2326087_2326153_-1, SAOUHSC_02522
U1209	1	2326188	754	M3	0.729270729270729	SigA	1	ttcataatttataactttaacatactccacagaTATTTTAGAAgtctactgtttCATGCTATAATCTACATTAAatgcacttaattatatttcaaaggagt	UA3	UB1	UC1	2326188	2327080	2327080	NA, S973, NA, S974		SAOUHSC_02523, new_2326402_2326645_1, SAOUHSC_02524, new_2326964_2327124_1
U1210	-1	2326204	925	M3	0.881118881118881	SigA	0.897102897102897	gttcggctagttggttttctaaagacatactataacactCCTTTGAAAtataattaagtGCATTTAATGTAGATTATAGcatgaaacagtagacttctaaa	UA166	UB1	UC1	-1	-1	-1
U1211	-1	2330386	461	M3	0.492507492507492	SigA	0.582417582417582	aaaacgaaaatagattaacgactgaaatctgaacgctcataaGaCTGtCatttgcgttcagatTTTTttaCacaatatagaatggttgagtaaaatatttt	UA3	UB1	UC1	2330386	2327156	2327156	S975, NA		new_2330318_2330386_-1, SAOUHSC_02525
U1212	1	2332050	882	M3	0.743256743256743	SigA	0.999000999000999	gacttcaatgaataaatttttcctcaagcaaccacatTAATGTTCATatacaattaccCCTGTTATAATGTCAATAATctaacaatgaggtgtttgatatg	UA75	UB1	UC1	2332050	2332809	2332809	NA, S977		SAOUHSC_02528, new_2332340_2332849_1
U1213	-1	2333125	672	M3	0.544455544455544	SigA	0.997002997002997	gcaattagaaatcaatatataattattaaGAGCAAAaataattatacTTTGTTAAAATAAGCGTAATtacatgtaaatagggggatactaatgatattgaa	UA3	UB1	UC1	2333125	2327173	2327173	NA, S976, fmhB, S975, NA		SAOUHSC_02529, new_2331700_2332330_-1, SAOUHSC_02527, new_2330318_2330386_-1, SAOUHSC_02525
U1214	1	2333200	401	M3	0.994005994005994	SigA	0.999000999000999	tataattatttttgctcttaataattatATATTGATTTctaattgctccCGTTTTATAATTACTATTGTtgtaaaaaggttagctaagctaactattttgt	UA20	UB1	UC1	-1	-1	-1
U1215	1	2340169	872	M4	0.944055944055944	SigA	0.997002997002997	attgggtttcttttttctactaccattaaaaatcatctcCAAAACTtttattttttCATGATATACTAGATGCACtaggaggggtaaaatgactgagttta	UA75	UB1	UC1	2340169	2340629	2340629	moaC		SAOUHSC_02543
U1216	-1	2344514	1175	M3	0.997002997002997	SigA	0.998001998001998	gtttgaatcaatatataaacaggcaacggTTCTTTTCAAatataatagtAAGTGTATAATGAAAATGTAaatattattaaaaatgggggttcactcaatga	UA140	UB6	UC4	2344514	2335231	2335231	modA, modB, modC, S981, moeB, moaB, S980, moeA, mobB, moaE, moaD, mobA, moaA, S979, NA, S978, sarV		SAOUHSC_02549, SAOUHSC_02547, SAOUHSC_02546, new_2342235_2342403_-1, SAOUHSC_02545, SAOUHSC_02544, new_2340135_2340692_-1, SAOUHSC_02542, SAOUHSC_02541, SAOUHSC_02540, SAOUHSC_02538, SAOUHSC_02537, SAOUHSC_02536, new_2335943_2336045_-1, SAOUHSC_02535, new_2335356_2335707_-1, SAOUHSC_02532
U1217	-1	2344638	1442	M2	0.998001998001998	SigB	0.998001998001998	ttaagtttgaaatttgattgataaaaattaatagcgagcaatCTGTTTGAtttaaattgaattcGAGAATATAcatactagggcatcaattaataaatatc	UA12	UB7	UC3	2344638	2343051	2342507	S982, modA, modB	modC	new_2344516_2344632_-1, SAOUHSC_02549, SAOUHSC_02547	SAOUHSC_02546
U1218	1	2344726	519	M3	0.923076923076923	SigA	0.999000999000999	tattaatttttatcaatcaaatttcaaacttaagcaaatATGTTAAAATtttaagcaaatTGCTTTAAAATAAAGTTTAAgctaattaaaggggttagata	UA3	UB1	UC1	2344726	2345338	2345338	fdhD		SAOUHSC_02550
U1219	-1	2347165	206	M3	0.717282717282717	SigA	1	atttatatagaacaacttattgtaaactttTCATTTCTTAaagtttacaatGGTGCTATAATAATGGTCATgaaatacgaaaggaagtaaaaaatgacaac	UA118	UB49	UC1	2347165	2345720	2345720	bioY, NA		SAOUHSC_02552, SAOUHSC_02551
U1220	-1	2349546	511	M3	1	SigA	1	attttttgcgaaaataaaaaataaataacactagCTATTGTAAAtgtatatgcaaTCTTGTATAATTTTTGAATGattgataatcattttcaataggagga	UA3	UB1	UC1	2349546	2348576	2348576	fhuD2		SAOUHSC_02554
U1221	-1	2350932	94	M3	0.58041958041958	SigA	1	cgaattatcagttttcttttaattgttcacagcacgtTCCTTTTTATttttaaagtcgAGTGTTAAACTAGGAATAAAtaatttatattgtgtgttgtgtg	UA304	UB20	UC1	2350932	2349647	2349647	NA, S983, NA		SAOUHSC_02556, new_2349892_2350013_-1, SAOUHSC_02555
U1222	-1	2351017	1440	M2	0.997002997002997	SigB	0.997002997002997	attgtttgaatatcaccttaaactatacagcgaattgtaTAGTTTAAggtgtatttttatGGATAAAATtaagtgcatacttaatcgaattatcagttttc	UA12	UB7	UC3	2351017	2349749	2349749	S984, NA, S983, NA		new_2350934_2351017_-1, SAOUHSC_02556, new_2349892_2350013_-1, SAOUHSC_02555
U1223	1	2352221	89	M3	0.999000999000999	SigA	1	ctaattacacattgaactttgtatatTACTTGTTTAtcacaacaattAGGATTAATATAAATTTTGTaaattgtatctaatatgaaattgggggttttaat	UA305	UB45	UC1	-1	-1	-1
U1224	-1	2357944	868	M3	1	SigA	1	ataaatgtatttaaccatattctagtaataaaaATATTGAATTtttatacttatTTGTTTAGAATGAACTTTATaacatagttggatagagtttcgattta	UA75	UB1	UC1	2357944	2357399	2357399	S986, sarR, S985		new_2357847_2357944_-1, SAOUHSC_02566, new_2357362_2357498_-1
U1225	1	2358241	1500	M1	0.899100899100899	NM	0.901098901098901	aaagaagagctttaaatcataacgcatgccatttatctttaaatgcaatgagttatcattcaaactcttcttatcaacctacatacattgacattatacta	UA90	UB23	UC9	2358241	2358394	2358394
U1226	-1	2358711	1479	M4	0.887112887112887	SigA	0.998001998001998	gttattgtaacaatcaagcgagaaaagttttctaaagTCACTATGCttattcaagCATGTTATAATTATCTTGAaaagggaatacaagttaagcttaataa	UA306	UB7	UC3	2358711	2357943	2357399	NA, S987	S986, sarR, S985	SAOUHSC_02568, new_2357946_2358222_-1	new_2357847_2357944_-1, SAOUHSC_02566, new_2357362_2357498_-1
U1227	1	2359853	1257	M3	0.997002997002997	SigA	0.998001998001998	tatgataaaaatgaatattgataatctagttAAATTTATTTctttgctcgatTCACTTATAATTGACATGTGcataataagtcctcgaaattttgtataat	UA258	UB54	UC3	2359853	2360077	2360077
U1228	1	2361884	777	M4	0.731268731268731	SigA	0.97002997002997	tgtcaagatattagcaaaaaattacaaaacgttaacaaagcacacaaggacgctaattTCTGTTATAGTCTTTCTTGtcgtttaattacgagagataactt	UA3	UB1	UC1	2361884	2362814	2362814	S988, ssaA		new_2361884_2361997_1, SAOUHSC_02571
U1229	-1	2361921	5	M4	0.626373626373626	SigA	0.692307692307692	taaaaattttaaatctaaaatattttcgtaatgTCCGTGtgacaaaattaATGTTATAAGTTATCTCTcgtaattaaacgacaagaaagactataacagaa	UA307	UB80	UC15	-1	-1	-1
U1230	-1	2363221	1364	M2	1	SigB	1	tttacagggataggtattaaaaagtcatcgaattcACGTTTAActtaatgtgagcgTGGAATATAtataatatgttgaaacactttaatcatttataattg	UA76	UB7	UC3	2363221	2358725	2358266	S990, NA, S989, NA, sarY	NA	new_2363061_2363221_-1, SAOUHSC_02572, new_2361923_2362817_-1, SAOUHSC_02570, SAOUHSC_02569	SAOUHSC_02568
U1231	-1	2365917	577	M2	0.731268731268731	SigB	0.731268731268731	ttattaaaaataaaaataattggtggacgtcggCGTTTAAataggttaatttaaGGTTATATAtacttaacatttataatgatgcgtaatgaattcgcatc	UA3	UB1	UC1	2365917	2362941	2362006	S992, NA, S991, nhaC, S990, NA	S989	new_2365812_2365916_-1, SAOUHSC_02574, new_2364635_2364728_-1, SAOUHSC_02573, new_2363061_2363221_-1, SAOUHSC_02572	new_2361923_2362817_-1
U1232	1	2366019	869	M3	0.747252747252747	SigA	0.946053946053946	ttatttttatttttaataattgtttaataaacATGTTTATTtttgattatatTTTGTTATAGTTAAAGATAAtattacaattttcaaaggagtgtctaata	UA75	UB1	UC1	2366019	2366435	2366435	NA		SAOUHSC_02575
U1233	1	2366618	862	M4	0.979020979020979	SigA	0.986013986013986	tagtcaaagtttttttattcttttacaaatcaataacattCCCCACAAGaagcattaatTTTGTTAAAGTAACTATTGtcatcaattcgagatgtgagaat	UA75	UB1	UC1	2366618	2367251	2367251	S993, NA		new_2366622_2366717_1, SAOUHSC_02576
U1234	-1	2367293	33	M1	0.993006993006993	NM	1	gaggaaatataaataagtaggtggcaacgaaaaatagcaaaaaaagaGCTTCTCCtataaaggaaAGCTCaaagttttttgatgacatatgtactagaatt	UA162	UB59	UC13	-1	-1	-1
U1235	1	2367544	1277	M3	0.992007992007992	SigA	1	aaagtacgcgcttacatcattgatacacaagacatcatgacaTAGTTGTATActgtctaatctTCTACTATACTAAGATAAAAggagtgatcttttatgga	UA308	UB3	UC3	2367544	2368560	2368560	NA		SAOUHSC_02577
U1236	-1	2369786	710	M4	0.97002997002997	SigA	1	taagtccttaaaaatgaaacgttagttccaagagtcatttttaaacaatagtgcaTGTGATAAAATAGAAAAGAatgaaaaatatagaggtgacaatatga	UA3	UB1	UC1	2369786	2368636	2368636	NA		SAOUHSC_02579
U1237	-1	2371153	664	M3	0.757242757242757	SigA	0.994005994005994	tgaaaaacaaaaaaatcacgtgctattgtgaatcaatcatcGACAGGCCTAtgaaacatcaTGTATTATTATGATTATGTAagttatttaaataaaaaggg	UA3	UB1	UC1	2371153	2369809	2368636	NA, S994, NA	NA	SAOUHSC_A02450, new_2370699_2370857_-1, SAOUHSC_02580	SAOUHSC_02579
U1238	-1	2374858	1426	M3	0.706293706293706	SigA	0.965034965034965	aaaatgattgtaaaaaggcaaaatacaaaatttTACTTAACAActagtacataaAGTAATACAATTAAATTAATtctatctgaaagatgtgtggggcatcg	UA12	UB7	UC3	2374858	2371322	2371322	S995, fdhA, NA		new_2374747_2374858_-1, SAOUHSC_02582, SAOUHSC_02581
U1239	-1	2375097	1445	M2	1	SigB	1	aaatattaccttctaaatgatagtagatatttatcaaacttGGGTTATTaattttcagaaaaaGGGTATTTAtaaatagtataacgatttttaggtgaggt	UA12	UB7	UC3	2375097	2371322	2371322	S996, S995, fdhA, NA		new_2374860_2375096_-1, new_2374747_2374858_-1, SAOUHSC_02582, SAOUHSC_02581
U1240	-1	2377273	1381	M2	0.796203796203796	SigB	0.796203796203796	ctagccgatttttttatgcataaaatgaagaagtcttcagttgtaTTGTTGAttcttttaatataGGGTAATAAtaaaatgataatgatatgagaagtggt	UA12	UB7	UC3	2377273	2375283	2375283	NA, S998, NA, S997		SAOUHSC_02584, new_2376272_2376427_-1, SAOUHSC_02583, new_2375241_2375347_-1
U1241	1	2377349	1493	M1	0.996003996003996	NM	0.996003996003996	tacaactgaagacttcttcattttatgcataaaaaaatCGGCTAGTCacgtgctaGCCGACaaatagaaaggaaagtaagtaataaatattgaagatgttg	UA90	UB23	UC9	2377349	2377417	2377417
U1242	-1	2377477	1299	M4	0.965034965034965	SigA	1	atctttttaaaaaaatcgtaaaaattttgtggaaaacgcTTACATTTTaaaaaagatTGTGCTATGATATTACTTGtaacagggggagcgattaaacaaag	UA36	UB3	UC3	2377477	2375300	2375300	S999, NA, S998, NA		new_2377331_2377476_-1, SAOUHSC_02584, new_2376272_2376427_-1, SAOUHSC_02583
U1243	1	2377567	1215	M4	0.805194805194805	SigA	1	cacaaaatttttacgatttttttaaaaagatattgaaaaTGTCCTCATtgtcactctTATGTTATACTTTGTGTAAtatatcatcttttaggaggtggctg	UA179	UB6	UC4	2377567	2378301	2378301	NA		SAOUHSC_02585
U1244	-1	2379739	662	M3	0.993006993006993	SigA	0.996003996003996	atcgtatcaatgatttgaatcaaattagtaatTTGTTGTCTCatatacttagttTCGTTTATCATGTAGAAGTAcctccaaaaatcaattattaaacagga	UA3	UB1	UC1	2379739	2378938	2378938	NA		SAOUHSC_02587
U1245	1	2380174	334	M3	0.987012987012987	SigA	1	tttattacataaattatacaattaaaaagtttcttcAAATTGTAAAgatgcattaatCGAGTTATAATCATAATGATtaagatggtagatttagtcttata	UA1	UB1	UC1	2380174	2381497	2381497	S1001, NA, S1002		new_2380174_2380508_1, SAOUHSC_02589, new_2381382_2381537_1
U1246	-1	2383188	758	M3	0.863136863136863	SigA	0.94005994005994	gcaaatattaatgTACCAaaatcgataattTATAGTATAATTACGGCAATaagtttttttatggatttatttagtatcaatcagagatggggtaagaagtt	UA3	UB1	UC1	2383188	2381641	2381641	NA, S1003		SAOUHSC_02590, new_2381560_2381767_-1
U1247	1	2383390	780	M4	0.969030969030969	SigA	1	ttaaaaaagttgctcaagtaccgttgagtcacatacaacttCAGCTATTCttggtaatTATGATATAATTTTAATAAtattaaaaaggagtatatcaatgt	UA3	UB1	UC1	2383390	2383962	2383962	NA, NA		SAOUHSC_02591, SAOUHSC_02592
U1248	-1	2385928	1079	M3	0.738261738261738	SigA	1	gagaatgactaaataatcttaattttcagaaaagTAATTGTAACcttactggtctTATGGTAATATTTTTCAATAttatcgacgaggatgtgttaacaatg	UA6	UB5	UC5	2385928	2384072	2384072	NA, NA, NA		SAOUHSC_02595, SAOUHSC_02594, SAOUHSC_02593
U1249	1	2388059	426	M4	0.813186813186813	SigA	0.972027972027972	tcaacgcctttttctaaattagcgccaaacgtatgtggccatTGTGTTAAAATGGCATTTAtaaatgtattaaacattaagtaacccatcaatgctgcaag	UA78	UB1	UC1	-1	-1	-1
U1250	-1	2388441	1289	M3	0.947052947052947	SigA	0.999000999000999	atacaaaatactttcaaaatacgtcaatgtCGTTGTAGGtgtgtaagcgttTACTATATATTATATTTAAAtagtaagacatctatttataaatgaatcta	UA36	UB3	UC3	-1	-1	-1
U1251	1	2388503	751	M3	0.991008991008991	SigA	0.999000999000999	atatagtaaacgcttacacacctacaacgACATTGACGTattttgaaagtaTTTTGTATAATCAGATTATCttttcatatagtgaaaattttttcacgacc	UA3	UB1	UC1	2388503	2389317	2389317	S1005, NA		new_2388501_2388686_1, SAOUHSC_02599
U1252	-1	2390048	1192	M4	0.654345654345654	SigA	0.999000999000999	aacgctaatcttttaaaaatgatgatcatctatgtTTGGAACTgagcaaaaaTACGTTAAAATAAAAGTAAgagcgaaagtgggtggacaacagtggcaaa	UA309	UB6	UC4	2390048	2389512	2389512	NA		SAOUHSC_02600
U1253	-1	2391671	889	M3	0.986013986013986	SigA	0.986013986013986	actcctgattaatttaTGATTGACGTactaaggattaTCTTGTAACGTAAACGTAAAtaagcatcacttatctagagaggtggagggactggccctatgaa	UA75	UB1	UC1	2391671	2389529	2389512	S1008, S1007, NA, S1006, NA		new_2391526_2391671_-1, new_2391394_2391524_-1, SAOUHSC_02601, new_2390050_2390181_-1, SAOUHSC_02600
U1254	-1	2392402	256	M4	0.945054945054945	SigA	0.999000999000999	taaacgtcagaacggacaaagaataataggatatgttttcaattaaatagcgaagtatttaTATGTTAAGATGATGTAAAttacatagaaacgctacccgt	UA135	UB1	UC1	2392402	2391688	2389529	NA	S1008, S1007, NA, S1006, NA	SAOUHSC_02603	new_2391526_2391671_-1, new_2391394_2391524_-1, SAOUHSC_02601, new_2390050_2390181_-1, SAOUHSC_02600
U1255	-1	2393696	1366	M2	1	SigB	1	ttttataaagaagaaagtaatttttagtgtaatcATGATTAAgttcctaggaagattGGGTAAATAataaccattaagcgaataaggagatgtaaaaaaat	UA76	UB7	UC3	2393696	2392419	2391586	NA	NA, S1008	SAOUHSC_02604	SAOUHSC_02603, new_2391526_2391671_-1
U1256	-1	2395034	1089	M4	0.929070929070929	SigA	1	tattcgagaacacgtttttgtatagagtctcaattataaaagtTAGAATAGtttgacaacAGTGTTACGATATTATTAAacaactgtctatcattaacgaa	UA6	UB5	UC5	2395034	2393881	2393881	NA		SAOUHSC_02605
U1257	-1	2398147	1291	M3	0.958041958041958	SigA	1	tttatagattcaagctatggataattagtttatttaTATTTGTTGGctatattttaaCATACTATAATGAATATTGAagataataatgtaagcgttttaaa	UA36	UB3	UC3	2398147	2395190	2395190	S1010, hutU, hutI		new_2398066_2398148_-1, SAOUHSC_02607, SAOUHSC_02606
U1258	1	2398151	1186	M4	0.937062937062937	SigA	1	agttaattccactaaatttaaaacgcttacattattatCTTCAATATtcattatagTATGTTAAAATATAGCCAAcaaatataaataaactaattatccat	UA310	UB6	UC4	2398151	2399024	2399024	hutR		SAOUHSC_02608
U1259	-1	2401274	1416	M2	0.997002997002997	SigB	0.997002997002997	gaaaatgtaatagtcttgacgtattttattaacataaatcagctaagtatTCGTTATTacatagaaaatagGGGTAAAAGtaatgtagataagtattttta	UA12	UB7	UC3	2401274	2400137	2400137	S1012, hutG, S1011		new_2401142_2401276_-1, SAOUHSC_02610, new_2400095_2400205_-1
U1260	1	2401375	759	M3	1	SigA	1	gtcaagactattacattttcattaatattgacatagaCAATTTATCTctcggcttgtaATATGTATAATTGTTACTAAaagatattttgcttgttacctaa	UA3	UB1	UC1	2401375	2402679	2402679	lyrA		SAOUHSC_02611
U1261	-1	2403503	953	M4	0.86013986013986	SigA	0.984015984015984	ttagaattgtaaattctgattgatatgtttaaaaaaatgttagaaataagggTATGTTAATTTATACGAGTcatgtaaaatatgaattgaatagattacat	UA100	UB38	UC1	2403503	2402772	2402772	rpiA		SAOUHSC_02612
U1262	1	2403579	340	M3	0.716283716283716	SigA	0.998001998001998	ttctaacatttttttaaacatatcaatcagaatttacaattctaaaaatgtttTATAGTACAATATATTTTAAataatactcgttaaggagaatgatatga	UA15	UB1	UC1	2403579	2404209	2404209	NA		SAOUHSC_02613
U1263	-1	2405989	665	M3	0.997002997002997	SigA	1	gtgttactcttatttttttatatttagCTATAGAATAatgtctaaaaAAGTGTACAATATGAATGTGaaaacgaactttttaaaatgggaatgtgaagtaa	UA3	UB1	UC1	2405989	2404404	2404404	NA, galM, S1013		SAOUHSC_02615, SAOUHSC_02614, new_2404365_2404504_-1
U1264	1	2409300	619	M3	0.999000999000999	SigA	0.999000999000999	tgaaaacccgctacaagtacacatctatatggagactCATTTGAAAGtcaacgcttcgTTAACTATACTAAAAATATGtcatactgcaatgttcacgttta	UA3	UB1	UC1	2409300	2409343	2409343
U1265	-1	2409419	1139	M3	0.508491508491508	SigA	1	tatgattaatttaaataaaaatgaaaaagatATTTTTATtgtggtaaatgTTTGATAAAATAGTATTGTTaagaattataaaaatgtaaagtatatacttt	UA157	UB9	UC4	2409419	2408365	2408365	S1014, NA		new_2409101_2409419_-1, SAOUHSC_02620
U1266	1	2410363	623	M3	1	SigA	1	atgcattaatattattgatattattttcaaaAACTAGAAATattgatttgttGCATGTATAATGTTAAAAGCgcccttttataacgcttacatataaaagc	UA3	UB1	UC1	2410363	2411655	2411655	S1015, gltS		new_2410363_2410443_1, SAOUHSC_02622
U1267	-1	2413761	704	M4	1	SigA	1	ccttagtgactatcatactaaaataaattaagacATACACGttatttaattCATGATAAAATAATAGAGAattcgttatttagggggagtatcgatggctt	UA3	UB1	UC1	2413761	2411714	2411714	corA, fni		SAOUHSC_02624, SAOUHSC_02623
U1268	1	2413800	347	M3	0.892107892107892	SigA	0.997002997002997	taaataacgaattctctattattttatcatgaattaaatAACGTGTATGtcttaatttatTTTAGTATGATAGTCACTAAggagatggttattatcaaaca	UA209	UB1	UC1	2413800	2414766	2414766	NA, NA		SAOUHSC_02625, SAOUHSC_02626
U1269	1	2415837	750	M3	0.958041958041958	SigA	0.996003996003996	atatattttatgtatccaatgattgtctatcCCCTACATTCtttgccaaaaaAAGTATATAATGTAGAAGATattttctttttcactttcaaatttaagac	UA3	UB1	UC1	2415837	2416585	2416585	S1017, NA		new_2415837_2415966_1, SAOUHSC_02628
U1270	-1	2415908	606	M3	0.641358641358641	SigA	1	atgcaaggtacctccgtataaagttcttttctttACTTATCAATatgtctagttgTCTGTTATAATGATGAAAAAtcactgttcaattgtagtcttaaatt	UA3	UB1	UC1	2415908	2414859	2414859	S1016, NA		new_2415742_2415908_-1, SAOUHSC_02627
U1271	-1	2416202	417	M3	0.673326673326673	SigA	0.995004995004995	ccttgttgtaaatcattgatattacccaaattaatatttaaTTGATGCATTtttccaattgtCTCGTTAAAATTTTTAATGCcatcaaaatctacagattc	UA8	UB1	UC1	-1	-1	-1
U1272	1	2419478	745	M3	1	SigA	1	cattaattaatatcatctttttcatgaaacatttcctccTATTTGCTTTtaaaattcactTTATTTATTATAGAGACATGataactaaaaaaacaccaaca	UA3	UB1	UC1	2419478	2420206	2420206	S1018, NA, S1019		new_2419478_2419562_1, SAOUHSC_02631, new_2420115_2420241_1
U1273	-1	2419494	386	M3	0.953046953046953	SigA	0.992007992007992	acctttgtgaattttaaccaacactcttataaaaattgtTGGTGTTTTTttagttatcatGTCTCTATAATAAATAAAGTgaattttaaaagcaaatagga	UA20	UB1	UC1	2419494	2416814	2416814	NA, NA		SAOUHSC_02630, SAOUHSC_02629
U1274	-1	2421627	820	M4	0.868131868131868	SigA	0.999000999000999	tcattttataccttttataagttgtaatgatgttcatgaaacttgtgactAATGCTAATATATAAAAGAgcatatttaaatttagtttctgttcgtgatag	UA3	UB1	UC1	2421627	2420265	2420265	S1020, NA, tcaB		new_2421552_2421625_-1, SAOUHSC_02633, SAOUHSC_02632
U1275	1	2424055	934	M3	1	SigA	1	aacaaattaagatttacatgttgctgctttcTCCTTGCTTTaataaattaaaTCATCTACATTTATATTTAAtatttattataagcgaggtgtcagtatgt	UA168	UB29	UC1	2424055	2425102	2425102	NA		SAOUHSC_02638
U1276	-1	2424783	1377	M2	1	SigB	1	acacaaacaattttaactgcttcatgatacaaattgttgatgatTTGTTTAGaatataaaaagtttGTGTATGTAtttatagagtgagattccattagtat	UA12	UB7	UC3	2424783	2421795	2421795	S1022, NA, tcaR, S1021, tcaA		new_2423898_2424783_-1, SAOUHSC_02637, SAOUHSC_02636, new_2423203_2423416_-1, SAOUHSC_02635
U1277	-1	2425086	637	M3	0.996003996003996	SigA	0.998001998001998	caattgtctaatcaaggattaacgaatatttaaagatAGTTTGACGCaatattagaaaCAACCTATAATAATAGTTTGtttgtggattaactattataaat	UA3	UB1	UC1	2425086	2421795	2421795	S1023, S1022, NA, tcaR, S1021, tcaA		new_2424785_2425076_-1, new_2423898_2424783_-1, SAOUHSC_02637, SAOUHSC_02636, new_2423203_2423416_-1, SAOUHSC_02635
U1278	-1	2427881	234	M3	0.49050949050949	SigA	0.55044955044955	atttttgcgtaaaaaaacaattgttcatattgagttcatatttcaaccttATACTGACgctaaagaagaaatagggagaagtgaatcgatatgaaattagc	UA311	UB1	UC1	2427881	2426062	2426062	NA, hrtA		SAOUHSC_02641, SAOUHSC_02640
U1279	1	2427942	264	M3	0.991008991008991	SigA	0.992007992007992	gcgtcagtataaggttgaaatatgaactcaatatgaacaattgtTTTTTTACGCaaaaatattttACATGTATAATAAATGAAAAagataagggagtttat	UA10	UB1	UC1	2427942	2429998	2429998	hssR, hssS		SAOUHSC_02643, SAOUHSC_02644
U1280	1	2430152	1051	M4	0.826173826173826	SigA	0.997002997002997	ctttctagccacttaacatttaatttctaccattcaacaaaatttaaatatatcgatggtcattTATGGTTTAATAATTTTGAaggaggcattaacctatg	UA312	UB40	UC5	2430152	2431596	2431596	NA, NA, S1024		SAOUHSC_02645, SAOUHSC_02646, new_2431129_2431632_1
U1281	-1	2432777	1263	M4	0.735264735264735	SigA	0.996003996003996	aggtttgtggttttgtctttgtgctatcgcacataaagtatataattaaagtagtttcgtTATTATAAAATATTAATATacatagtagatagtaatagagc	UA277	UB76	UC3	2432777	2431162	2431162	S1025, mqo1		new_2432630_2432777_-1, SAOUHSC_02647
U1282	-1	2432892	1278	M4	0.882117882117882	SigA	1	cttttttttatggatcattaatgaaagaagtttgacattaTAATAatggtagcgcttTATGTTAAAATGAATAGTGagtaatcagcaatcaaattaaattg	UA308	UB3	UC3	2432892	2431162	2431162	S1026, S1025, mqo1		new_2432779_2432892_-1, new_2432630_2432777_-1, SAOUHSC_02647
U1283	-1	2434751	43	M3	0.973026973026973	SigA	0.999000999000999	aacagatttaaaatgaaaaataaaacaattaaataggaaagtgATATTGTTAAtagtctgaaaaAATGGTATATTTTAATTGTGaaaaaaatcacattaat	UA43	UB25	UC7	2434751	2432998	2432998	S1027, lctP2		new_2434609_2434749_-1, SAOUHSC_02648
U1284	1	2434879	532	M3	0.626373626373626	SigA	1	atgaattgtacttaatgtaatgaagtaacttatactaTTCATGAATTttacataagacCGTGCTAAAATAAGGAAGATactacgatgaggaatggaagtta	UA3	UB1	UC1	2434879	2436662	2436662	NA, S1028		SAOUHSC_02649, new_2436599_2436704_1
U1285	-1	2437546	1423	M2	0.643356643356643	SigB	0.643356643356643	gtaaaataattaaatttatagaaaacataaaattcacaaaaattaaataataatgaacaaaaattAGGGTATAATaaaaagaaccttagattgtagttatg	UA12	UB7	UC3	2437546	2436755	2436755	S1029, NA		new_2437381_2437546_-1, SAOUHSC_02650
U1286	-1	2438288	266	M4	0.838161838161838	SigA	1	ataaatgtatcatttattgatgttacacacaatcaATACAATTTgtaattgattTGTGTTAATGTATTTTTAAatagttttggctgaaaaataacataagt	UA10	UB1	UC1	2438288	2436755	2436755	S1031, NA, S1030, S1029, NA		new_2438210_2438285_-1, SAOUHSC_02651, new_2437548_2437693_-1, new_2437381_2437546_-1, SAOUHSC_02650
U1287	1	2438339	546	M3	0.681318681318681	SigA	0.996003996003996	aaaatacattaacacaaatcaattacaaattgtatTGATTGTGTGtaacatcaataAATGATACATTTATTCCAGTaaaatggccgtattttcaaaagaga	UA3	UB1	UC1	2438339	2439382	2439382	S1032, NA		new_2438345_2438501_1, SAOUHSC_02652
U1288	-1	2441004	183	M3	0.954045954045954	SigA	1	tagttattgataattcatggctaactatgcgattTATTTTAACAatataaatattAATAGTATAATGGCTTTAAAtgataataattatcaatttgagcacg	UA25	UB14	UC1	2441004	2439475	2439475	NA, NA, S1033, NA		SAOUHSC_02655, SAOUHSC_02654, new_2439786_2439886_-1, SAOUHSC_02653
U1289	-1	2441618	570	M3	0.954045954045954	SigA	1	ctaaaccaaattcagttgtgtcatatcttcgcttttttgTCACTGTTATaataggtataaTCGGATATAATGAAAAGGTGagggaggattcaaaatgcgta	UA3	UB1	UC1	2441618	2441158	2441158	NA		SAOUHSC_02656
U1290	1	2443119	348	M3	0.962037962037962	SigA	1	atatattcattttattaattacctccttattagacaatGTGTTGAATAtttcgcatgttgTCTATTATAATATGTAAGTGggaataaacaatacacaatgt	UA209	UB1	UC1	2443119	2444822	2444822	S1034, NA, cobI		new_2443122_2443228_1, SAOUHSC_02659, SAOUHSC_02660
U1291	-1	2443130	510	M3	0.861138861138861	SigA	0.972027972027972	tgtatttgtctattaatgaacgtattgatgaacattgtGTATTGTTTAttcccacttaCATATTATAATAGACAACATgcgaaatattcaacacattgtct	UA3	UB1	UC1	2443130	2443079	2443079
U1292	1	2446522	1268	M3	0.86013986013986	SigA	0.99000999000999	tatataaacacctacaccatttttgatagcgcattcatttTTATTGCTATactacatgcatgTATATTAACATTAATTATCGgaggtaattttatgaaaga	UA313	UB3	UC3	2446522	2446777	2446777
U1293	1	2448138	13	M1	0.816183816183816	NM	0.864135864135864	tagttgaatatcaataaaagattagcaagttagttcaaaatggctatgtattgttttttgaaatacataggtttgaaatctatattaattatgcaccaaat	UA72	UB22	UC8	2448138	2448188	2448188
U1294	-1	2448180	1250	M3	0.93006993006993	SigA	0.949050949050949	aaagtaaaattagaaagatagtaagcaaaatttggaaattttcgATAGAGTCTAattaaattattTGGTGCATAATTAATATAGAtttcaaacctatgtat	UA146	UB43	UC3	2448180	2445153	2445153	S1036, S1035, NA, scrA		new_2446929_2448180_-1, new_2446372_2446927_-1, SAOUHSC_02662, SAOUHSC_02661
U1295	1	2448341	905	M3	0.537462537462537	SigA	0.673326673326673	agttttcattaatttcttttatttttcactattaCCttttcaaaaatatTCAACTATAATAGGTATACTatccatgattttaaaaatttccatgttttaca	UA133	UB1	UC1	2448341	2450568	2451673	S1037, NA	NA, S1038, NA	new_2448341_2448425_1, SAOUHSC_02664	SAOUHSC_02665, new_2451025_2451170_1, SAOUHSC_02666
U1296	1	2450564	1413	M2	0.994005994005994	SigB	0.994005994005994	taaatatatttgctttaaaccaagctaaatactaacagtcctcttGTGTTTAGtttcttacgttaaaGGCTATTTAtatcataaggagatgatttgtaatg	UA12	UB7	UC3	2450564	2451248	2451673	NA, S1038	NA	SAOUHSC_02665, new_2451025_2451170_1	SAOUHSC_02666
U1297	1	2451212	849	M3	0.969030969030969	SigA	0.982017982017982	gacacactttattcacatttaacgtgattaggGTGTGTCTTTttaaattaattTTATGTAATATAAATACTGCatttgcaaactgttgcacttttaggtat	UA3	UB1	UC1	2451212	2451673	2451673	NA		SAOUHSC_02666
U1298	1	2451250	850	M3	0.995004995004995	SigA	1	ctttttaaattaattttatgtaatataaatactgCATTTGCAAActgttgcacttTTAGGTATAACAGAATTAACtacatttaaggagattgatgaaccat	UA3	UB1	UC1	2451250	2451673	2451673	NA		SAOUHSC_02666
U1299	-1	2453908	851	M3	1	SigA	1	tgagaataaaaaaatttgttacaatctggtaaaaaCTCTTTATTAaataaattgatTCGTTCATACTGAATAGATAagcaaaaaggagttacataatgaag	UA3	UB1	UC1	2453908	2452055	2452055	NA, S1040, gltT		SAOUHSC_02668, new_2453327_2453507_-1, SAOUHSC_02667
U1300	-1	2454031	627	M3	0.974025974025974	SigA	0.998001998001998	aaatgtaattgtatcatccttaattgttaaAAGTAGTCAAttattttgataGATAGTAAAATAAAATTTGTtattaaattttttaaaagcatcgtgtatgt	UA3	UB1	UC1	2454031	2452055	2452055	S1041, NA, S1040, gltT		new_2453910_2454027_-1, SAOUHSC_02668, new_2453327_2453507_-1, SAOUHSC_02667
U1301	1	2454233	870	M3	1	SigA	1	ttaaattcaattatagacaattcaataattgcgatgaaatcagTACTTGACAActattacacttCATAATATTGTTTATTTTAAcaaggagtgattggatg	UA75	UB1	UC1	2454233	2455362	2455362	sarZ, S1042, NA		SAOUHSC_02669, new_2454718_2454901_1, SAOUHSC_02670
U1302	1	2454903	972	M3	0.976023976023976	SigA	0.987012987012987	tttattacttttttatctcccctttTACTTTAACTtttttaatactACTCATATAATGGCTTTGTAatacaaatttctataatggaagtgatgatattgaa	UA203	UB33	UC1	2454903	2455362	2455362	NA		SAOUHSC_02670
U1303	-1	2456780	53	M4	0.506493506493506	SigA	0.998001998001998	agggtaaatcacttcataaataagggaaaatccttATGTTCACtttttcacaatCATAATAAAATATATATGTAgtcaatactttgtctatattgaatgtt	UA43	UB25	UC7	2456780	2455455	2455455	S1043, narK		new_2456638_2456781_-1, SAOUHSC_02671
U1304	-1	2461490	1343	M3	0.46953046953047	SigA	0.934065934065934	gtgggtgtgtctgagcatttatatcatataggcgcTGTTTATATtggtagcatcTTTGGTATAATAACTTTGATagggatgtttttattaacagcgagacg	UA131	UB8	UC3	2461490	2458889	2458889	NA, nreB, S1044, nreC		SAOUHSC_02677, SAOUHSC_02676, new_2459501_2459573_-1, SAOUHSC_02675
U1305	-1	2467678	39	M3	0.964035964035964	SigA	0.981018981018981	attgatagggaaattccttaagtaattaggtgattcccTAATATTTTAtgtttgtgaaaAAATGTACAATCTAATTAAAgcaatagtcttgggcattttaa	UA314	UB31	UC7	2467678	2458889	2458889	S1046, narG, S1045, narH, narJ, narI, NA, nreB, S1044, nreC		new_2467581_2467678_-1, SAOUHSC_02681, new_2463788_2463890_-1, SAOUHSC_02680, SAOUHSC_02679, SAOUHSC_02678, SAOUHSC_02677, SAOUHSC_02676, new_2459501_2459573_-1, SAOUHSC_02675
U1306	-1	2472402	40	M3	0.903096903096903	SigA	0.991008991008991	attccctgattttacattataatgtgattCTTTTCACAAaaacaaaatgaTTTGGTATACAATACGTGTGaaagggttggtaaatgtgaatgggaatatca	UA314	UB31	UC7	2472402	2467933	2467933	nirR, nasD, nasE, nasF		SAOUHSC_02685, SAOUHSC_02684, SAOUHSC_02683, SAOUHSC_02682
U1307	-1	2474637	853	M3	0.925074925074925	SigA	0.997002997002997	gctttattgaaataaagttgttgaaaatatgtaaaaacttttttgtttcattCGGTTTATAATAATCTTGTAatattataaaaatgagggatgattcgatg	UA3	UB1	UC1	2474637	2473356	2473356	NA, S1047, NA		SAOUHSC_02688, new_2474201_2474416_-1, SAOUHSC_02687
U1308	-1	2475187	615	M4	0.976023976023976	SigA	1	tgattaatattactatagtttataacaaatgatttggTAACATATGttactcaatgCATGTTAAGATGAGTAAATataaaagatagggagtgggaagatga	UA3	UB1	UC1	2475187	2473373	2473373	NA, NA, S1047, NA		SAOUHSC_02689, SAOUHSC_02688, new_2474201_2474416_-1, SAOUHSC_02687
U1309	-1	2476926	172	M3	0.993006993006993	SigA	0.993006993006993	atgattcgactttatattatttataaaaacagTGCTTGTATTttaagtagcatGAGTATATAATTTTAAAACGtaaagattactatttaggagggtgacta	UA89	UB14	UC1	2476926	2475345	2475345	NA		SAOUHSC_02690
U1310	-1	2476994	1017	M2	0.999000999000999	SigB	0.999000999000999	gttttctgtatcatatttgtacaatagtcATGTATTAgataaaacgaaaagTGGTAAATAcctaaagtatgattcgactttatattatttataaaaacagt	UA125	UB10	UC5	2476994	2476943	2475345		NA		SAOUHSC_02690
U1311	-1	2477735	1056	M3	0.999000999000999	SigA	1	cccgtgcgaaatcttgattagtagtttttttctgtgtCGCTTGTTTTattgtacagatATTTGTACAATTGAGGTGTGttaaaaggaggcgataaatatga	UA315	UB5	UC5	2477735	2477147	2477147	NA, NA		SAOUHSC_02692, SAOUHSC_02691
U1312	-1	2479014	685	M3	0.983016983016983	SigA	0.996003996003996	tgttatttctttggatatttatattaaatgcattggtagtagTTGTAGCGCAttaatgtttgaCGGTGTATAGTATTAATTATattgaaagttagttggaa	UA3	UB1	UC1	2479014	2477997	2477997	S1048, NA, NA		new_2478940_2479014_-1, SAOUHSC_02695, SAOUHSC_02694
U1313	-1	2482800	100	M3	1	SigA	1	aaagctttttagcaaaagttcaacATATTGACTTatccggcatttCAGATTAAAATATTTTTATTccgattagaataataagaataaggagatatattcta	UA37	UB20	UC1	2482800	2480564	2480564	NA, NA, NA		SAOUHSC_02699, SAOUHSC_02698, SAOUHSC_02697
U1314	-1	2484361	909	M3	0.66033966033966	SigA	0.732267732267732	gaaattgtaataaaGTCGTGCTAAttttttggaaaATGGGTATAATTACCGGATAtctaaaaatgtgtgtcgttttttagatggtgagggggaagctttaa	UA108	UB1	UC1	2484361	2480564	2480564	NA, ycnB, S1049, NA, NA, NA		SAOUHSC_02701, SAOUHSC_02700, new_2482802_2482880_-1, SAOUHSC_02699, SAOUHSC_02698, SAOUHSC_02697
U1315	1	2484461	173	M3	0.999000999000999	SigA	1	gcacgactttattacaatttctttaaaacgtaatcattaCTATTTACATatgagtagttaTCGGTCATAATATATTTACAaggagggatagagatgaaatt	UA89	UB14	UC1	2484461	2484687	2484687	NA, S1052		SAOUHSC_02702, new_2484599_2484726_1
U1316	-1	2484491	168	M1	0.911088911088911	NM	0.971028971028971	ttgttttaatgttagggctatttaaattacgacgagcagtctgtaaatctaatttcatctctatccctccttgtaaatatattatgaccgataactactca	UA206	UB65	UC1	2484491	2480564	2480564	S1050, NA, ycnB, S1049, NA, NA, NA		new_2484394_2484491_-1, SAOUHSC_02701, SAOUHSC_02700, new_2482802_2482880_-1, SAOUHSC_02699, SAOUHSC_02698, SAOUHSC_02697
U1317	-1	2485594	1243	M2	0.99000999000999	SigB	0.99000999000999	aaggtgtataatatgatttgttattaggtggttattgattcatttATGAATTAaaaaatgaaaatgGGGAATAGGatttatgtatttaatgtctagtgata	UA237	UB70	UC16	2485594	2484763	2484763	S1053, gpmA		new_2485439_2485594_-1, SAOUHSC_02703
U1318	-1	2485648	181	M3	0.999000999000999	SigA	1	ctatttttaggtttacctaaaaatattttttaaaCCTTAGAAAAatagagaacaaAGGTGTATAATATGATTTGTtattaggtggttattgattcatttat	UA127	UB14	UC1	2485648	2484763	2484763	S1053, gpmA		new_2485439_2485594_-1, SAOUHSC_02703
U1319	-1	2486667	860	M3	0.892107892107892	SigA	0.996003996003996	taattttataaaaatttataaaaattaaaaACGTTGTAAAattaaaatgaaTCATTCATAATATTGTTACTatactaattcaaggtggttcaacgcatgtc	UA124	UB1	UC1	2486667	2485783	2485783	NA		SAOUHSC_02704
U1320	1	2487328	225	M3	0.711288711288711	SigA	0.995004995004995	agttaatctattagttaacattagttaataattagtTAATTTCCATttgtattctcaTGTGATAAATTCTAAAAGCAtacaataaatttaatatgtaaaaa	UA145	UB55	UC1	2487328	2488767	2488767	sbi, S1054		SAOUHSC_02706, new_2488694_2488781_1
U1321	-1	2487347	486	M3	0.657342657342657	SigA	0.985014985014985	acttcgagatatatttatttttcatgtgtattcccttTCTTTTTAcatattaaattTATTGTATGCTTTTAGAATTtatcacatgagaatacaaatggaaa	UA3	UB1	UC1	-1	-1	-1
U1322	1	2489184	1120	M3	0.839160839160839	SigA	0.902097902097902	catgttgatagtaattaacttttaacgaacagtTAATTCGAAAacgcttacaaaTGGATTATTATATATATGAActtaaaattaaatagaaagaaagtgat	UA65	UB30	UC4	2489184	2490161	2490161	hlgA		SAOUHSC_02708
U1323	-1	2492668	202	M4	0.734265734265734	SigA	0.799200799200799	aagaatggcagtattactaagataataaatcaaaacacggtcgtcacaattactgttggcgacCGTGTTTTACTAGCTATTTattgttttcagtttctttt	UA118	UB49	UC1	2492668	2492532	2492532	S1056		new_2492062_2492668_-1
U1324	-1	2498063	203	M3	1	SigA	1	aaaatttatagttatactgagaagtttaaattcatgttTTCTTGAAAAacatgcgccttAAATGTAAACTTATTAATTAtaaaagtttacatttggattga	UA118	UB49	UC1	2498063	2492719	2492719	bioD, bioA, bioB, bioF, bioW, bioX		SAOUHSC_02716, SAOUHSC_02715, SAOUHSC_02714, SAOUHSC_02713, SAOUHSC_02712, SAOUHSC_02711
U1325	-1	2502094	192	M3	0.963036963036963	SigA	0.998001998001998	tgtgtcacaaatccacgcgACATTGATAAtcgttatcaacTAATATATGATGTACTTGTAataagtattaatttttaacaaataacaaatttatattatgt	UA25	UB14	UC1	2502094	2501712	2501712	NA		SAOUHSC_02719
U1326	1	2502163	31	M1	0.917082917082917	NM	0.956043956043956	catcatatattagttgataacgattatcaatgtcgcgtggatttgtgacacatttcttttaaaaattcacaaggttatggggcagaaatgataaagagcca	UA316	UB81	UC19	-1	-1	-1
U1327	-1	2502777	1478	M4	0.81018981018981	SigA	0.998001998001998	actaaaaaaaactttacttaagccttaatattgcgtgaaatataataaataAATGATATAATATGATGGTcgcctaacatctcgggcgttactttaacgca	UA317	UB7	UC3	2502777	2502630	2502630	S1058, NA		new_2502718_2502777_-1, SAOUHSC_02721
U1328	-1	2503327	1322	M2	1	SigB	1	tataaggatgaggggaaaGAGACTAAatttgctgtgaaaGGGTATAAAgattgaaataagcatatttgaagtgaagcggattggctcgcatattcgagtat	UA74	UB13	UC3	2503327	2502783	2502630	S1059, NA	S1058, NA	new_2503238_2503327_-1, SAOUHSC_02722	new_2502718_2502777_-1, SAOUHSC_02721
U1329	1	2503461	136	M3	1	SigA	1	taactgatttatcgcgtgactcattagcactatagagatTACTTTAGTTcactagtaattTTATATACAATAAGAGCGACaacagtaatgagaggatgtct	UA300	UB26	UC1	2503461	2504033	2504033	NA		SAOUHSC_02723
U1330	1	2504217	993	M4	0.987012987012987	SigA	1	ctgatgcaaagatgataccaaagttggattTCGCAATgtcgcattatCATGATAAGATAAAAATGTgcacaggaaagtccgttaatcaaataccaggttct	UA318	UB50	UC1	2504217	2505376	2505376	NA		SAOUHSC_02724
U1331	1	2505508	587	M3	0.996003996003996	SigA	0.999000999000999	agtatagggattttttatataaacttgtattctaaCTACATACAAatacacacaaaACGTATATAATTTATATAATtatatcatttaaaggagtctgatca	UA3	UB1	UC1	2505508	2506753	2506753	NA		SAOUHSC_02725
U1332	-1	2505522	380	M4	0.67032967032967	SigA	0.995004995004995	gaaaaatgcttcgttttggttttcgttgattgCATGATCAgactcctttaAATGATATAATTATATAAAttatatacgttttgtgtgtatttgtatgtagt	UA57	UB1	UC1	2505522	2505435	2505435
U1333	1	2507419	161	M3	0.929070929070929	SigA	0.988011988011988	atcactccattaattttattcactcatgtaaaacatatgTTTAGGACATtttgcattgaCGCTATATAATTATATTAAAtatttattgaatcaatgcgagg	UA319	UB26	UC1	2507419	2508096	2508096	S1060, NA		new_2507419_2507554_1, SAOUHSC_02727
U1334	-1	2507817	107	M4	0.451548451548452	SigA	0.677322677322677	tgtttcgctggcttgttatcaaagcggaaaacacgtagtaatgGTTTAGaaccaagattagTATGGTATATTAACACAGGttgaccttgatcgataatacc	UA320	UB42	UC1	-1	-1	-1
U1335	1	2509207	1285	M3	0.994005994005994	SigA	0.997002997002997	cccttacctatcaaatgttttttcttatatttaaaaaaaTAATTGCTTTattaaatggatTTCTTTAGTATTTATAATTAagaaaacgcttacacacaact	UA36	UB3	UC3	2509207	2510680	2510680	S1061, NA		new_2509218_2509279_1, SAOUHSC_02729
U1336	1	2510786	761	M4	0.512487512487512	SigA	1	ctagagtttttttgaaaataacttcattttatcaatatatcTATGTCATtatgccttaaaAGTGATAAAATATTAACTATtaaaattttgaggagtattgt	UA3	UB1	UC1	2510786	2512907	2512907	NA		SAOUHSC_02731
U1337	-1	2514904	809	M3	0.982017982017982	SigA	0.983016983016983	cataaaaaatattaattaactCTCTATACTTtttggaaagatAGGCGTATAGTGATATCCATcaaaaactataaaaaggaataggagattatgttcaatca	UA3	UB1	UC1	2514904	2513153	2513153	NA		SAOUHSC_02733
U1338	-1	2514959	250	M3	0.822177822177822	SigA	0.906093906093906	agaggtatatttaccattatttttgacaccttatatgttaatAGGTGTATAATTACATAAAAaatattaattaactctctatactttttggaaagataggc	UA321	UB1	UC1	2514959	2513085	2513085	NA		SAOUHSC_02733
U1339	1	2515046	1217	M3	0.867132867132867	SigA	0.999000999000999	ataaggtgtcaaaaataatggtaaatatacctctTTAATTAATTtattcaatagaACTGGTATAATAAAATAAATctcattaggcacttaagtaaatttaa	UA179	UB6	UC4	2515046	2516579	2516579	NA		SAOUHSC_02736
U1340	-1	2516115	160	M4	0.554445554445554	SigA	0.981018981018981	tattccgaatttagatttgcaagtacaacaattCCATAATTttgttttggaTTTAGTAAAATAAATGATGAaaagttatctagcgttcctgaatgaaacac	UA322	UB26	UC1	-1	-1	-1
U1341	-1	2518831	973	M3	0.938061938061938	SigA	0.971028971028971	catattaagcgaatgattttcAAATTGACGCtaatatgcgaaAGTAGTATTTTTAAAATGAAcaacaacgatgaagaggggtttataggatgaaaattgca	UA243	UB33	UC1	2518831	2517811	2517811	NA		SAOUHSC_02739
U1342	-1	2520488	599	M4	0.516483516483517	SigA	0.983016983016983	tgtaaaaatactaaaaaatgagatgttttattTATAAtTTtctgcaaattTATGATATTGTTTCTTAATatatcatattaaaaatttgtttttcttaaaca	UA3	UB1	UC1	2520488	2517012	2517012	NA, S1062, NA, NA		SAOUHSC_02740, new_2518833_2519027_-1, SAOUHSC_02739, SAOUHSC_02737
U1343	-1	2524500	252	M3	0.983016983016983	SigA	0.999000999000999	ataaattcgcttttaaaaaatatgagttatctattTAGTTGCCAAagataaaataaTAATGTTTAATAACATCATAtagagtatgttagttttaaatgtcg	UA135	UB1	UC1	2524500	2520701	2520701	S1063, opuCA, opuCB, opuCC, opuCD		new_2524234_2524492_-1, SAOUHSC_02744, SAOUHSC_02743, SAOUHSC_02742, SAOUHSC_02741
U1344	-1	2525547	210	M3	0.917082917082917	SigA	0.994005994005994	aatgcattttttgtaagaacgcaaaagcatttgtaaaattaGTTTTTTATAaaattaggataTATAATACAATGTGTATTGAaaaacaaaatggaagtgat	UA52	UB15	UC1	2525547	2524866	2524866	NA		SAOUHSC_02747
U1345	1	2525635	423	M3	0.997002997002997	SigA	0.998001998001998	caaatgcttttgcgttcttacaaaaaatgCATTTGACTAttattataatAAGCGTATAATTGTCGCATAttattttttgtatttttggcaataacgaagga	UA78	UB1	UC1	2525635	2527340	2527340	NA		SAOUHSC_02750
U1346	1	2527411	1408	M2	1	SigB	1	caacacacacacattaaccaaccattgatttcaacatcttggtTGGTTTTTtattttgaaaatcGGTTATAAAtaactaacataacaagatgatgatcagg	UA12	UB7	UC3	2527411	2530740	2530740	S1065, pnbA, S1066		new_2527411_2527892_1, SAOUHSC_02751, new_2529323_2530783_1
U1347	1	2527894	1424	M4	0.975024975024975	SigA	0.992007992007992	attcagtcacaaaattgtcttgttatacttgTCACCTATCatctatagacCGTGGTATGATTAAATTGGggatgataaaggaggttaataaatatgaagat	UA12	UB7	UC3	2527894	2529278	2529278	pnbA		SAOUHSC_02751
U1348	-1	2530620	106	M3	0.500499500499501	SigA	0.958041958041958	tttcaataattttccaattaagcaCAGAAAAttaaagcaaaaTATTATATAATAGAACGGTTatatataaaattgtgttgcacacattttttaataaatcg	UA323	UB42	UC1	2530620	2529371	2529371	S1067, NA		new_2530469_2530620_-1, SAOUHSC_02752
U1349	-1	2532387	1389	M2	0.986013986013986	SigB	0.986013986013986	acaagaaaatgattttttcttaaatgtaatTGCACTAAaaaccaaaaaaacGGGAATAATatacctgatatattacatgaggagcggtgcaaatgttgtta	UA12	UB7	UC3	2532387	2530833	2530833	NA, NA, S1068		SAOUHSC_02754, SAOUHSC_02753, new_2530805_2530923_-1
U1350	-1	2533723	440	M4	0.987012987012987	SigA	0.999000999000999	attttaaaaatatttaagcctgaaaatgataaagcggtagggaACGTTTTtctgaaagttAGTGATACAATAGTTTTAAgttgaaatacaggaggatgaat	UA93	UB1	UC1	2533723	2532601	2532601	NA		SAOUHSC_02755
U1351	-1	2534590	1050	M3	0.966033966033966	SigA	1	aggtattaagaatacgatgaactcgttggtaATATTGACGTactcaagtgcgTACGCTATAATTAGCGTAACagaaaacaaaggagggtttatatgattat	UA94	UB40	UC5	2534590	2532635	2532601	NA, NA, S1070, S1069, NA		SAOUHSC_02757, SAOUHSC_02756, new_2533960_2534033_-1, new_2533725_2533958_-1, SAOUHSC_02755
U1352	1	2534867	213	M4	0.956043956043956	SigA	1	actcatatcttcaaaaaaaatgacaaaatttaaatttttgaaTAACATCATtttttagtaAATGTTATAATTTCTTTATaatacaaatatcgaaagaaggc	UA26	UB15	UC1	2534867	2535347	2535347	NA		SAOUHSC_02759
U1353	-1	2537242	131	M3	0.961038961038961	SigA	0.999000999000999	tcttaaatagttgtattatatagatactttagcacatatTACTTtgtattgtatgTTTTATACATTAAAATTTAAaatgaaaaacatatcataaaattgtt	UA114	UB26	UC1	2537242	2535457	2535457	S1072, NA, S1071		new_2537117_2537225_-1, SAOUHSC_02760, new_2535429_2535538_-1
U1354	1	2537263	812	M4	0.948051948051948	SigA	1	acaattttatgatatgtttttcattttaaattttaatgtataaaacATACAATACaaagtaataTGTGCTAAAGTATCTATATaatacaactatttaagag	UA3	UB1	UC1	2537263	2538084	2538084	NA		SAOUHSC_02761
U1355	1	2548004	175	M3	0.962037962037962	SigA	0.982017982017982	acttagatgcttttattgttttcacctcaactaaaacttcaaaaAAGTTGCAGAaaacaaatcgtaACTATTACGATTTGATTATAtactatattagttga	UA89	UB14	UC1	-1	-1	-1
U1356	-1	2548040	174	M3	0.999000999000999	SigA	1	aaggattatcaaaatataaatgtgcattcatttacaacctTTATTGACAAtgattctcaacTAATATAGTATATAATCAAAtcgtaatagttacgatttgt	UA89	UB14	UC1	2548040	2538160	2538160	S1077, S1076, dapF, NA, S1075, NA, S1074, opp-1A, opp-1B, opp-1C, opp-1D, opp-1F, NA, S1073		new_2547824_2548037_-1, new_2547543_2547822_-1, SAOUHSC_02770, SAOUHSC_02769, new_2545813_2545891_-1, SAOUHSC_02768, new_2544456_2544597_-1, SAOUHSC_02767, SAOUHSC_02766, SAOUHSC_02765, SAOUHSC_02764, SAOUHSC_02763, SAOUHSC_02762, new_2538124_2538234_-1
U1357	-1	2549906	1414	M2	1	SigB	1	tatagcagagtagttaagactgcctgaagacttatctattAGGTTTATgaagcatcgaacagTGGAAAATAaggactgtaagtttaagatatgttgtatag	UA12	UB7	UC3	2549906	2548428	2548428	S1079, NA, S1078, NA		new_2549676_2549907_-1, SAOUHSC_02772, new_2548775_2549036_-1, SAOUHSC_02771
U1358	1	2550053	884	M4	0.684315684315684	SigA	0.999000999000999	tttaacaatattagtttttttatttcctgaaaattgTTACTTTtgagagtatttTTTGTTACACTTTAAATATttaacaaaggggggaataattgatgaca	UA75	UB1	UC1	2550053	2551616	2551616	NA		SAOUHSC_02773
U1359	1	2551684	1492	M1	0.908091908091908	NM	0.912087912087912	taacagtattcaaagggataaattaaaatgCCACTATacaagatttgaCCTGTatagtggcatgatttgttatgatatagcgttcgagatgaaactctgca	UA324	UB23	UC9	2551684	2551854	2551854
U1360	-1	2552346	1396	M2	0.999000999000999	SigB	0.999000999000999	cgtgatttattgacattatcaaattttctcaaatGTGTGTGAttttttataaaaaaGGGTAGAGCaaggtataatatcctttcaatctgttttcatatttt	UA12	UB7	UC3	2552346	2551692	2551692	S1081, NA		new_2552161_2552346_-1, SAOUHSC_02774
U1361	-1	2553525	312	M3	0.805194805194805	SigA	0.999000999000999	gctgcttttccttgacctagattaaaattatagattTTCTTTGTAagagtgtgtttTGTAGTATCATAAATATGTAaactgtataaaattccaccacattt	UA1	UB1	UC1	2553525	2552644	2552644	NA, NA		SAOUHSC_02776, SAOUHSC_02775
U1362	1	2555137	1441	M2	1	SigB	1	tgctactttatctgttaatactgtcataatgatcgactcctTTGATTCTttttattttttcaGGGTAAATCataaatacatattacttttaaaaagcgtat	UA12	UB7	UC3	2555137	2555747	2555747	S1083, NA, NA		new_2555135_2555344_1, SAOUHSC_02779, SAOUHSC_02780
U1363	-1	2555167	321	M4	0.82017982017982	SigA	0.993006993006993	atttatctatgaaaatgaagcgagttatTATGACCGttatatgaatTGTGATACGCTTTTTAAAAgtaatatgtatttatgatttaccctgaaaaaataaa	UA1	UB1	UC1	2555167	2553766	2553766	NA, S1082, NA		SAOUHSC_02778, new_2554158_2554407_-1, SAOUHSC_02777
U1364	1	2555346	108	M3	0.994005994005994	SigA	0.999000999000999	aaatgttgaaaaatcgtcacttctTTATTGTAAAaacattatattAGTAATAAAGTTAATACTGTgatttatcattcgattgaatgattagagggaggaat	UA245	UB42	UC1	2555346	2555747	2555747	NA, NA		SAOUHSC_02779, SAOUHSC_02780
U1365	1	2556189	10	M1	0.993006993006993	NM	0.993006993006993	atcactccaatgtttatatagtatttatataaactctctcGTCTCTCTctatttattaACTTCTtacaagtctaatattacatgaatttccaaataaataa	UA292	UB22	UC8	-1	-1	-1
U1366	-1	2556210	47	M3	0.967032967032967	SigA	0.992007992007992	ccaaaatagtgataaatttgtgaaatacatcacaaatCCCTTTATTTatttggaaatTCATGTAATATTAGACTTGTaagaagttaataaatagagagaga	UA43	UB25	UC7	2556210	2553766	2553766	S1087, NA, S1086, S1085, S1084, NA, S1082, NA		new_2556125_2556210_-1, SAOUHSC_02781, new_2555768_2555932_-1, new_2555355_2555766_-1, new_2555169_2555353_-1, SAOUHSC_02778, new_2554158_2554407_-1, SAOUHSC_02777
U1367	1	2559536	1427	M2	0.951048951048951	SigB	0.951048951048951	aataatatcaatatcatagtctttttTGATATTtttgataaagtcttGGGTATTTTtataatgtggatctttatctgtgacggaatgaaggccaatattga	UA12	UB7	UC3	2559536	2559810	2559810
U1368	1	2565322	561	M4	0.649350649350649	SigA	1	aaaattaatattttacattcacatgaacgctctactccATGCATTTTcatacacatcTATTATATAATACTTGTGAaaagtattgtcttggggctgtgttt	UA3	UB1	UC1	2565322	2567324	2568174	NA, S1089	NA, S1090, NA	SAOUHSC_02793, new_2567273_2567339_1	SAOUHSC_02794, new_2567659_2567801_1, SAOUHSC_02795
U1369	-1	2565326	319	M4	0.565434565434565	SigA	1	aagaaatacgccccaaaagtaaaaaaacacagccccaaGACAATActtttcacaagTATTATATAATAGATGTGTAtgaaaatgcatggagtagagcgttc	UA1	UB1	UC1	2565326	2565275	2565275
U1370	1	2567273	363	M3	0.867132867132867	SigA	0.996003996003996	taatttttcaaaagtatattagaaaattaattttcatGTATTTTTCAtattaagcggtAATAATATAATAATTAATACcgcgacctatttaattgttttcg	UA188	UB1	UC1	2567273	2568497	2568497	S1089, NA, S1090, NA		new_2567273_2567339_1, SAOUHSC_02794, new_2567659_2567801_1, SAOUHSC_02795
U1371	1	2567341	235	M3	0.916083916083916	SigA	0.924075924075924	taattaataccgcgacctattTAATTGTTTTcgcgatgaaaaAGGTTTAGAATTACAAAAATaactattttaaatttagttacaaatatattttagaaagg	UA311	UB1	UC1	2567341	2568769	2568769	NA, S1090, NA		SAOUHSC_02794, new_2567659_2567801_1, SAOUHSC_02795
U1372	-1	2569832	357	M3	0.948051948051948	SigA	0.997002997002997	ctttaaggggtgtatttttgttataaatttgattTTTTTGATAAtattttcataTTTAATATAATCATAATTAGtagaatataacctctgagtagtcattt	UA259	UB1	UC1	-1	-1	-1
U1373	-1	2573824	246	M3	0.752247752247752	SigA	0.998001998001998	ggaaagtttcatgggcaacgtttaaatgatgtcATCTTAACTTatgttgcttcaACTGGTAAAATGAGAGCAGAatatgctggtaaaacttgggagacttc	UA16	UB1	UC1	2573824	2573452	2573452
U1374	-1	2574948	238	M3	0.945054945054945	SigA	0.99000999000999	aaataattttataaagataagtgttatattCCATTGTGCAactcctattgtATTTGTAAAATTACATGTAAattcactgtaagtaaagtggaaaatatgga	UA23	UB1	UC1	2574948	2573469	2573452	sasG		SAOUHSC_02798
U1375	-1	2575674	387	M3	0.858141858141858	SigA	1	ataacaaatgacaaattcatttattatccaaaaataaaaaCAATTGAACAaaatcaaaatatAGTGTTATGATTCATTTGTGtttatagctagcaccacaa	UA20	UB1	UC1	2575674	2574540	2574540	S1091, sarT, sasG		new_2575518_2575674_-1, SAOUHSC_02799, SAOUHSC_02798
U1376	-1	2577752	848	M4	0.936063936063936	SigA	1	caaatttcccaagaaataattacatactcaatgacactatgaaggcgttctaattAGTGTTAAAATGACGTTGAtacatagatttaatacttaggaaaagg	UA3	UB1	UC1	2577752	2576869	2576869	S1092, gtaB		new_2577616_2577753_-1, SAOUHSC_02801
U1377	-1	2583227	1019	M2	0.998001998001998	SigB	0.998001998001998	atgaaaggtagtaatcagaatggaaatcaaccaaAAGTTAGGatatttgaatacttGGGTAATAAtgaagacatagcgaagagtgtatatgcaaatacgac	UA125	UB10	UC5	2583227	2582581	2582581
U1378	1	2588676	1127	M4	0.973026973026973	SigA	0.997002997002997	tttctctggatatccatacatcatcaaagtcactccttcattacacGACATACTtgtatacaagTATGTTAATATAGTTATTAtgagtttgcaagcgcttt	UA113	UB16	UC4	-1	-1	-1
U1379	-1	2588686	1125	M3	0.772227772227772	SigA	1	ggggtggtcactattttagtgctcgtaaagaaagCGCTTGCAAActcataataacTATATTAACATACTTGTATAcaagtatgtcgtgtaatgaaggagtg	UA325	UB16	UC4	2588686	2587477	2587477	gntR, gntK		SAOUHSC_02809, SAOUHSC_02808
U1380	-1	2590453	214	M3	0.943056943056943	SigA	0.999000999000999	tgtttcagtatcagcccaaagttcgatagtgtatTAGTATTATCttaataaaatgTTAGGTACAATAAAGATGATtatatatcggaggttagtataaaaat	UA26	UB15	UC1	2590453	2588820	2588820	relP, S1094, NA		SAOUHSC_02811, new_2589558_2589721_-1, SAOUHSC_02810
U1381	1	2591081	1064	M4	0.883116883116883	SigA	0.997002997002997	tctttccatttttcggggtaacctttcattgtaaagggcATTCCCTtaacctccaaTATGTTATAATTCATGTTAtataccaccataattataaaatgaaa	UA83	UB5	UC5	2591081	2591566	2591566	S1095		new_2591081_2591610_1
U1382	-1	2591094	1108	M2	0.826173826173826	SigB	0.826173826173826	atgacgggagtctaaaaaattgtgtttaatATGTTTCAttttataattatggTGGTATATAacatgaattataacatattggaggttaagggaatgccctt	UA134	UB51	UC5	2591094	2590622	2590622	NA		SAOUHSC_02812
U1383	-1	2591489	1335	M2	0.995004995004995	SigB	0.995004995004995	ctatgaacctatctgtgaaattaaataacatgacgcAAGTTTATaatgcagctaatgGTGAATTATttagtgataagacattgattcaaaattattatcct	UA13	UB8	UC3	2591489	2591115	2590656	S1096	NA	new_2591096_2591199_-1	SAOUHSC_02812
U1384	-1	2593209	428	M3	0.512487512487512	SigA	1	aaattaattttaattggactttaaaagtttttaaaTTTAGATaattgagcataaGGTGTTATAATGACATATGTtgcgtaattaaaatttatagcaacaaa	UA78	UB1	UC1	2593209	2590656	2590656	S1097, NA, NA, S1096, NA		new_2593094_2593206_-1, SAOUHSC_02814, SAOUHSC_02813, new_2591096_2591199_-1, SAOUHSC_02812
U1385	-1	2594906	1124	M3	0.988011988011988	SigA	1	aaagttaagcggaatttaataaaatttttatagattCTATTGTAAAcgctttccatgTCTGATAATATTATAAAAAAtaactttggtacaattttgtgaca	UA211	UB16	UC4	2594906	2593512	2593512	S1098, NA		new_2594780_2594906_-1, SAOUHSC_02815
U1386	1	2595200	781	M3	0.94005994005994	SigA	0.991008991008991	gtttagatgatcatttattgactttttgctcttatAGCAAGCAATtttttgatttaTTGCTTATAATACATTTTAAgacaaatgtttgtttcaacatcgca	UA3	UB1	UC1	2595200	2595969	2595969	S1099, NA		new_2595204_2595325_1, SAOUHSC_02816
U1387	-1	2597694	922	M3	0.93006993006993	SigA	0.958041958041958	aactaagtaaatatatgttaattacaacaaTATTTGACAAaaatgggagtgACAACAATAATATAGTTAACcggttaactaatgaagaggaggaataatag	UA166	UB1	UC1	-1	-1	-1
U1388	1	2598017	354	M4	0.58041958041958	SigA	0.999000999000999	atttatgttttatattattaaagttttttaaatccatatTTTTATaacacttgctaTGTGATAAAATTAATTTTATatataaaatcttaagattcagatta	UA259	UB1	UC1	2598017	2599590	2599590	NA, NA		SAOUHSC_02820, SAOUHSC_02821
U1389	1	2599853	1283	M3	0.994005994005994	SigA	1	aaatcctgccctctatttttatcaattcaagcatacTTATTGAAAAatgttaacgttTTCTTGATAATCATTGTAAGcgcatttattttataaactaacgt	UA36	UB3	UC3	2599853	2601953	2601953	fbp, NA		SAOUHSC_02822, SAOUHSC_A02680
U1390	1	2602182	597	M4	0.654345654345654	SigA	1	cgcttctactccaatttaacaaaatactatattagtactatatttttcattaacatgTATGTTACATTTTCTATATtacttaaaattacgaagggacattt	UA3	UB1	UC1	2602182	2603330	2603330	S1101, NA		new_2602191_2602403_1, SAOUHSC_02823
U1391	-1	2605555	1001	M3	1	SigA	1	taagcacagtttgaaatgaagatgaaaacacgtATCTTGACATtaaatctattcAGCTATATAATTTATCTCGAaatcgaaataaaataaaaaagttggtg	UA326	UB17	UC1	2605555	2605225	2605225	NA		SAOUHSC_02826
U1392	1	2605684	1149	M4	0.529470529470529	SigA	0.977022977022977	gactacatagatgtggcaatgtcgtcacatgactgtcATGCACCTttgacttcgttTAAGTTAAAATAGAATAGGGaaatactataatcaatcatgatagg	UA327	UB4	UC4	2605684	2605999	2605999	NA		SAOUHSC_02827
U1393	1	2606137	1352	M3	0.811188811188811	SigA	1	attgcaaaacgactagttattttgcatttcaaactttaTGCTATCAATtcattttctttTCTGGTATACTTTTTATACTaacttatagaaaaatagaaaaa	UA48	UB28	UC3	2606137	2606985	2606985	NA		SAOUHSC_02828
U1394	-1	2607841	1349	M3	0.997002997002997	SigA	0.999000999000999	acttataacatgtgcacaagttatagtgaattgcaaacggatTACTTTAGTCtttttaaaacaTGAAGTATAATTTGTATAGCaataaatataaaaatggg	UA328	UB28	UC3	2607841	2607095	2607095	frp		SAOUHSC_02829
U1395	1	2607940	61	M3	0.921078921078921	SigA	1	aacttgtgcacatgttataagttttctgcaataaaacacaCTTTTGAATTttgggaaatttAGTGTTATAATATATTTGTGatatttttcacaattaaatt	UA63	UB25	UC7	2607940	2609042	2609042	S1103, ddh		new_2607940_2608102_1, SAOUHSC_02830
U1396	1	2610326	207	M4	0.862137862137862	SigA	0.996003996003996	agaatattgtaaaaatataacgatatatttatcatttagacaaaatatagTGTGATATACTAATTTATAacatctatacataatgtgaaagaatttttaaa	UA329	UB15	UC1	2610326	2611677	2611677	S1104, NA, NA		new_2610334_2610419_1, SAOUHSC_02832, SAOUHSC_02833
U1397	-1	2612635	305	M4	0.697302697302697	SigA	1	cgtaaaagtatacatgtaaattttatagtataaaatgaattgctATGAGTCattttgaaattAATGGTATACTATATGAAAtgttaacaggcattgtgaaa	UA1	UB1	UC1	2612635	2611940	2611940	srtA		SAOUHSC_02834
U1398	1	2612732	162	M3	0.958041958041958	SigA	0.962037962037962	aaaatttacatgtatacttttacgttagatttcattacacaTATTTGCATTcaaataacgaaACGCTTTTAATAATTACTAAgggggaattgatatgatta	UA319	UB26	UC1	2612732	2613428	2613428	NA, S1105		SAOUHSC_02836, new_2613258_2613474_1
U1399	-1	2613895	575	M3	1	SigA	1	ttgaaagatttatggaaaatgcatactaatcaaaatagTGATTGCAAAagcgcccccgtATATCTAAAATAACTTAAAAggagtgatgatatgctaagact	UA3	UB1	UC1	2613895	2613674	2613674	NA		SAOUHSC_02837
U1400	-1	2616731	1271	M3	0.998001998001998	SigA	1	acttaaatatttgatttgataacagataaAAGTTGAAAAcgttttcttaaGGGTGTACGATGTTTATGGTctgaaaataaaataaacatagagagaggttt	UA207	UB3	UC3	2616731	2614048	2614048	S1106, NA, sdaAB, sdaAA		new_2616636_2616731_-1, SAOUHSC_02841, SAOUHSC_02840, SAOUHSC_02839
U1401	-1	2617046	286	M3	0.997002997002997	SigA	1	cagaaaactaaaaataatatcctactttaattatcTTATTGCAAAtatatgtgtaaTAAGTTATTTTTGAATATAGtgtgcggttttataaacacagcaca	UA99	UB1	UC1	2617046	2614031	2614031	S1107, S1106, NA, sdaAB, sdaAA		new_2616733_2617040_-1, new_2616636_2616731_-1, SAOUHSC_02841, SAOUHSC_02840, SAOUHSC_02839
U1402	1	2617185	3	M4	0.6003996003996	SigA	0.885114885114885	tataggttgaatctttacttttttttaaagctaaatttacaTCAActtaacaatggTTGGTTATACTGAAGATGAaaatatttagtataacttagtggagg	UA230	UB68	UC15	2617185	2618528	2618528	NA, S1108, S1109, NA		SAOUHSC_02842, new_2617438_2617500_1, new_2617553_2617619_1, SAOUHSC_02843
U1403	1	2617553	880	M3	0.906093906093906	SigA	0.998001998001998	tagaccactacatcttagatgatttttttattttcTCATTTCACTctttcttaaaaGTCGATATAATGAATTAAATcattatcatacaccgacatatttta	UA75	UB1	UC1	2617553	2618528	2618528	S1109, NA		new_2617553_2617619_1, SAOUHSC_02843
U1404	-1	2620592	132	M3	0.951048951048951	SigA	0.979020979020979	cattgaaaagtttgattttccgtaataaagttcaatTGCTTGTATTtttatcatgaaAGTAATAAAAATAAATTAACatgattttaaatctatttgtaaga	UA114	UB26	UC1	2620592	2618655	2618655	NA, NA, S1110, NA		SAOUHSC_02846, SAOUHSC_02845, new_2619606_2619737_-1, SAOUHSC_02844
U1405	-1	2623068	436	M3	0.531468531468531	SigA	0.54045954045954	atatgtataatagctatgaattagatatcacttgcgtgttactgGTAATGCAGGcatgagcaaacAACCGCACTatgagaatagtcttgtttgttcatgcc	UA14	UB1	UC1	2623068	2620814	2620814	S1112, glcB, S1111		new_2622981_2623068_-1, SAOUHSC_02848, new_2620794_2620913_-1
U1406	-1	2623109	229	M3	0.998001998001998	SigA	0.999000999000999	atgataaaattgtgaaaaagTTGTTGAAAAcgcttttacaaATATGTATAATAGCTATGAAttagatatcacttgcgtgttactggtaatgcaggcatgag	UA330	UB55	UC1	2623109	2623075	2620848		S1112, glcB, S1111		new_2622981_2623068_-1, SAOUHSC_02848, new_2620794_2620913_-1
U1407	-1	2625584	1393	M2	1	SigB	1	ttgcatctttaggaattatttttgtcttacttATCTTTGGaattagttataacGGGTATATGaaaggtggcagttggatcaaccatattttaaacgcaacg	UA12	UB7	UC3	2625584	2623245	2623245	cidC		SAOUHSC_02849
U1408	-1	2626190	112	M3	0.996003996003996	SigA	0.999000999000999	gaaaatagtaatacaaactataaaaaaagagTATTTTTATAttgtgtacgccATCTTTATAATAGTTATTGTaacaatttagacatatttagaaagggatg	UA303	UB64	UC1	2626190	2623245	2623245	cidA, cidB, cidC		SAOUHSC_02851, SAOUHSC_02850, SAOUHSC_02849
U1409	-1	2627282	438	M3	0.972027972027972	SigA	0.977022977022977	tttacataaaactttttataaagcaattttataaatctaaATTTATTGAAtgtttaagaagTTGTGTATAATGAAATAAACgtgttgaaatagttaggatg	UA14	UB1	UC1	2627282	2626373	2626373	S1113, NA		new_2627185_2627282_-1, SAOUHSC_02852
U1410	1	2627351	956	M4	0.782217782217782	SigA	0.996003996003996	cattcaataaatttagatttataaaattgctttataaaaagttttatgTAAAAtacacattctttTATGGTATTATATTAATGGctcaagtatattaatcg	UA232	UB38	UC1	2627351	2627640	2627640	NA		SAOUHSC_02853
U1411	-1	2627769	1326	M2	0.998001998001998	SigB	0.998001998001998	ttaattgtcatagtgatacaaggatgtcaggaTTGATTAAcagcggatattagtGGGAAAATAtaaaatgatttaaaagaaaaggtacgtggttctataac	UA59	UB8	UC3	2627769	2627716	2627716
U1412	1	2627963	866	M4	0.926073926073926	SigA	0.999000999000999	cttcattacagttacttttattgttgattgcttacaTTGTTTTctaaaaaaaaTTTGTTATCATAATTAACGttgaataaagaaaaaaattaacttgggag	UA75	UB1	UC1	2627963	2628422	2628422	NA		SAOUHSC_02855
U1413	1	2628609	576	M4	0.797202797202797	SigA	0.999000999000999	tgaacgtatatttcttcttcaactattatttcatctttagcatAATCTATatataaaatttTATGCTATTATTTAAATAAttcgctataacttaacatacg	UA3	UB1	UC1	-1	-1	-1
U1414	-1	2629500	6	M3	0.95004995004995	SigA	0.985014985014985	acttaagaataaatatctgaaaatactaaaaattctgaaaaaACCTTTCTTAtttttaatataTTGAGTATAATGTTTTTTGAgagaggagatatgacatt	UA331	UB80	UC15	2629500	2628549	2628549	NA, S1117, NA, S1116, NA, S1115		SAOUHSC_02858, new_2629108_2629200_-1, SAOUHSC_02857, new_2628811_2628972_-1, SAOUHSC_02856, new_2628502_2628705_-1
U1415	1	2631427	1223	M3	0.999000999000999	SigA	1	tttaccacaaaataacgtcattcgtcttaaaattCAATTGAATAattgtcgttttGACTTTAAAATAAAACAAGGtaaattaaaacgcttacaagaaacga	UA41	UB24	UC4	2631427	2632740	2632740	S1120, mvaS		new_2631431_2631515_1, SAOUHSC_02860
U1416	1	2631517	794	M3	0.574425574425574	SigA	0.999000999000999	acaagaaacgacaaatcatttttaaatttagtatatttCTTTGTATAaaattagcatatTCTGATATGATACAAGTGTTgcttttataaatttgaaaggat	UA3	UB1	UC1	2631517	2632757	2632757	mvaS		SAOUHSC_02860
U1417	-1	2631541	467	M3	0.959040959040959	SigA	0.966033966033966	cgtaaaagtttattttatcgatacCTATTGTCATaaggttttacaTCCTTTCAAATTTATAAAAGcaacacttgtatcatatcagaatatgctaattttat	UA3	UB1	UC1	2631541	2629977	2629977	S1119, mvaA, S1118		new_2631315_2631541_-1, SAOUHSC_02859, new_2629933_2630036_-1
U1418	-1	2631745	1165	M3	0.705294705294705	SigA	0.993006993006993	attcagttgccacaattaccatacCAATTTTCTTtttgtcttcgTCTGTTATAATGTCCTTAGCagcgttagcgcccattgaaacgatgtcttggtttaca	UA194	UB53	UC4	2631745	2629977	2629977	S1119, mvaA, S1118		new_2631315_2631541_-1, SAOUHSC_02859, new_2629933_2630036_-1
U1419	-1	2633451	1480	M3	0.993006993006993	SigA	0.999000999000999	cgacttatttatttttaaaaaatgtgaacatgaaTATTTTCTAAtttaacaattaAGGCGTATGATTAGAAAAAGggggaatttttatggagtataagagt	UA306	UB7	UC3	2633451	2632833	2632833	NA, S1121		SAOUHSC_02861, new_2632790_2632903_-1
U1420	1	2633736	1452	M2	0.999000999000999	SigB	0.999000999000999	ttaaaaataacacacaatattcataaagttttaaaaatattCTGTTTTAtcacctactattagTGGAAAAGtacaattgcaattgtatatagtttgcataa	UA12	UB7	UC3	2633736	2635953	2635953	S1122, clpL		new_2633743_2633833_1, SAOUHSC_02862
U1421	-1	2638474	208	M3	0.872127872127872	SigA	0.997002997002997	tttacatgaaaaatgaaaattatttaaataaaGTATTGCGAGctacaattttaAGGGTTATGATTTTTAAGTGataatgattattatttctaataggagag	UA52	UB15	UC1	-1	-1	-1
U1422	1	2640792	412	M3	0.509490509490509	SigA	0.979020979020979	tcatatgtgatatctgcaaatgcagttgttttatctttactaatTTGCTTAttttcataaggaTCTGATATTTTATCAATGTGcttgtcatcttttttaat	UA20	UB1	UC1	2640792	2640832	2640832
U1423	1	2641157	686	M3	0.993006993006993	SigA	1	gaatgtccccatcttatataaaaattttgccaaagtATATTGCCTCcttttaaaatcAACGTTATAGTTTAAATATAcagtgtagattattgttcgattat	UA3	UB1	UC1	2641157	2641835	2641835	S1124, NA		new_2641157_2641273_1, SAOUHSC_02867
U1424	-1	2641195	385	M3	0.988011988011988	SigA	0.999000999000999	tgtagtttaatatacaaaattttccaattgaTTCTTTAAGAggtcggggataGATACTATAATCGAACAATAatctacactgtatatttaaactataacgt	UA20	UB1	UC1	2641195	2638647	2638647	S1123, NA		new_2641109_2641195_-1, SAOUHSC_02866
U1425	1	2643790	1305	M3	0.686313686313686	SigA	0.898101898101898	taccccctataaattttgaaagtggtttaaccctttgatttaatgatataacatcatttaaacTCATTTTACTatgattaaggttagttttgcaatcgctt	UA92	UB3	UC3	-1	-1	-1
U1426	-1	2643802	1293	M3	0.913086913086913	SigA	1	acttgagaataagtgataaaacataaaaatgaaagCGATTGCAAAactaaccttaatCATAGTAAAATGAGTTTAAAtgatgttatatcattaaatcaaag	UA36	UB3	UC3	2643802	2641928	2641928	S1125, rocA, NA		new_2643723_2643798_-1, SAOUHSC_02869, SAOUHSC_02868
U1427	-1	2644546	270	M3	0.648351648351648	SigA	0.82017982017982	atttcataatgttatagcgtattagttgcataggcgaaggtttatttgattaacttttaaaCAagtaaataagttattaggagttgaaaggtgtaatgact	UA10	UB1	UC1	-1	-1	-1
U1428	1	2644704	1112	M3	0.996003996003996	SigA	0.999000999000999	caaatactgctaaagtagtagataaattcaatactacagaCGCATTCATTttttaatctatTAACGTACAATGTGAGTAAGagaaatataaaggagtatga	UA117	UB48	UC4	2644704	2645014	2645014	NA, S1126		SAOUHSC_02872, new_2644942_2645057_1
U1429	1	2645143	1219	M3	0.999000999000999	SigA	1	tctttttaaaattggtaaaagtaaaacgcaaCGATTGACTTatatacctataGGGGGTACATTAGACGTGTAacaatgaatcacagggaggcaataatgtg	UA227	UB66	UC4	2645143	2648125	2648125	copA, S1127, NA		SAOUHSC_02873, new_2647590_2647868_1, SAOUHSC_02874
U1430	-1	2650615	1068	M3	0.994005994005994	SigA	1	caatgaatgacgcctgttaaggttcaCGTTTGAATAcgtaccttgatgGGCGTTATACTTTATATAAGcatatctaactggttgcgcatgcggatatgcat	UA170	UB5	UC5	2650615	2648184	2648184	S1128, NA, NA		new_2650341_2650615_-1, SAOUHSC_02876, SAOUHSC_02875
U1431	-1	2656369	1448	M2	0.997002997002997	SigB	0.997002997002997	agagtattggcgtttttgttttatataaatataaatgagagCGGTTTATtcactgatctttaGGGAACTAAgtaataaagtgataatttatactatgtcag	UA12	UB7	UC3	2656369	2650683	2650683	S1130, crtO, NA, crtQ, crtM, crtN, S1129		new_2656295_2656361_-1, SAOUHSC_02882, SAOUHSC_02881, SAOUHSC_02880, SAOUHSC_02879, SAOUHSC_02877, new_2650686_2650766_-1
U1432	-1	2657369	373	M4	0.646353646353646	SigA	0.89010989010989	attaggaacagattacattatgataacaaagcCCGCAAGacacctaatcTCTGTTATAGTTTGTTTTGtcgcaaaactataaaagttataattgtttgcat	UA332	UB1	UC1	2657369	2656497	2656497	S1131, NA		new_2657237_2657369_-1, SAOUHSC_02883
U1433	-1	2661506	762	M3	0.536463536463537	SigA	1	aataacacttgatattgtaatgttttgtaaagaaagtgTAATTTACTGgctggtttttTGTGATATAGTGAGTACCGTtgaaagaaataaaagacaattta	UA3	UB1	UC1	2661506	2657619	2657619	S1134, isaA, S1133, NA, S1132, oatA		new_2661386_2661506_-1, SAOUHSC_02887, new_2660409_2660625_-1, SAOUHSC_02886, new_2659409_2659919_-1, SAOUHSC_02885
U1434	-1	2663212	1083	M4	0.756243756243756	SigA	0.999000999000999	tgtattgtaacaatatgtttgaaaaattgccaatttatttaTCTAAAAattcagaatttTGTGATATACTATTTTTCAtagtcttgagttatagatgatac	UA6	UB5	UC5	2663212	2661852	2661852	S1136, NA, S1135		new_2663049_2663174_-1, SAOUHSC_02888, new_2661807_2661992_-1
U1435	1	2663262	1028	M4	0.827172827172827	SigA	0.98001998001998	tagtatatcacaaaattctgaatttttagataaataaatTGGCAATTTttcaaacatATTGTTACAATACACTTTTattttatcttcatttttaaaatcca	UA18	UB10	UC5	2663262	2664122	2664122	NA, NA		SAOUHSC_02890, SAOUHSC_02891
U1436	1	2663408	702	M3	0.982017982017982	SigA	0.999000999000999	cattatttgttaggagcgtatcagcacttacatatcatcaacaCAATTGACAAtataatagaagATACTGATAATAAGTGTTAAaacaacagatgttaggt	UA3	UB1	UC1	2663408	2663510	2663510	NA		SAOUHSC_02891
U1437	1	2664340	928	M3	0.984015984015984	SigA	1	ttaggcaacaaatgatatgtgcgtgtTTATTGGCAAacgtacgacatAGTAGTATAGTATGTCTAAAcaacatatgttgcatagttgatatgcgttgttta	UA333	UB29	UC1	2664340	2665108	2665108	NA		SAOUHSC_02893
U1438	1	2666930	141	M3	0.994005994005994	SigA	1	cttttcttttatgatatttaatagttattgcaaatTCATTGCTAActttcttaacaCGTTTTATAATAAACGGAGAgttatccgtttgtcaattttagaga	UA68	UB26	UC1	-1	-1	-1
U1439	-1	2666936	472	M3	0.986013986013986	SigA	0.993006993006993	ttcgcatgattacacctacttaaaattctctaAAATTGACAAacggataactctCCGTTTATTATAAAACGTGTtaagaaagttagcaatgaatttgcaat	UA3	UB1	UC1	2666936	2665320	2665320	S1137, NA, NA, NA		new_2666860_2666935_-1, SAOUHSC_02896, SAOUHSC_02895, SAOUHSC_02894
U1440	1	2668270	1391	M2	0.997002997002997	SigB	0.997002997002997	catttattaatggcgatggagagatgccttggtagatcaattttATGTTACAaacattgaaattagAGGTATATAaaaaatgcttctgcaatagatgcaat	UA12	UB7	UC3	2668270	2670191	2670191	S1138, NA, NA		new_2668270_2668341_1, SAOUHSC_02899, SAOUHSC_02900
U1441	-1	2673854	176	M3	1	SigA	1	tgaattctctacaataacggaagtttttcttttaATATTGAAATttctcaaggatAGGTCTATACTTTATAAATCgtaattattacgatttataatcaaaa	UA89	UB14	UC1	2673854	2670012	2670012	S1141, NA, NA, NA, S1140, NA, S1139		new_2673777_2673854_-1, SAOUHSC_02904, SAOUHSC_02903, SAOUHSC_02902, new_2671240_2671336_-1, SAOUHSC_02901, new_2670241_2670348_-1
U1442	-1	2675229	957	M3	0.782217782217782	SigA	1	ataaaattttaatcgctattgttaatTTCTGTAATGtaaaacaaggtTGAGTTACAATAAAAGTGATtttataactttttgttcaataaaattctaggaat	UA334	UB33	UC1	2675229	2673956	2673956	NA, NA, NA, S1142		SAOUHSC_02907, SAOUHSC_02906, SAOUHSC_02905, new_2673918_2674109_-1
U1443	-1	2676309	1402	M2	0.997002997002997	SigB	0.997002997002997	taaaaagttttgaaaattgacgcaagtttgaataacgtttttAAGATTAAatcatcctaattaGGCAATATTatagtataaagtaagtagattggaaggtg	UA12	UB7	UC3	2676309	2675384	2675384	NA		SAOUHSC_02908
U1444	1	2676404	666	M4	0.788211788211788	SigA	0.996003996003996	cttgcgtcaattttcaaaactttttagttttaacTAGGAAATtatgtatggaAATGCTAGTCTATTAAAAGaatatatttcacatatattaagttgaggat	UA3	UB1	UC1	2676404	2678028	2678028	S1143, pyrD, S1144, NA, S1145		new_2676413_2676480_1, SAOUHSC_02909, new_2677603_2677699_1, SAOUHSC_02910, new_2677976_2678065_1
U1445	1	2677603	970	M3	0.757242757242757	SigA	0.992007992007992	taatccaacatagtcaaataatactttaaAACTTGCTGAatcgtcttattAAAATTATGATATAACTCAAgaagatatatttatcaccatttttcaaaata	UA203	UB33	UC1	2677603	2678028	2678028	S1144, NA, S1145		new_2677603_2677699_1, SAOUHSC_02910, new_2677976_2678065_1
U1446	-1	2678920	858	M3	0.999000999000999	SigA	1	tataaatgcattaaaatgaatttctaactttttTGACTGACATttaatatgaaTCATATATAATAGAAGTTAAtgattaaatgtgggaggttaaatcatga	UA3	UB1	UC1	2678920	2678240	2678240	NA		SAOUHSC_02911
U1447	1	2679188	156	M3	0.933066933066933	SigA	0.992007992007992	cgtgtattttacaaaagattgacttcaattcatcgtaaaAGTTATACTTttgccatttttTAATGTAACATGGTGTTAGTaataaaaataatacattgagg	UA335	UB26	UC1	2679188	2679711	2679711	NA		SAOUHSC_02912
U1448	-1	2680395	403	M4	0.719280719280719	SigA	0.994005994005994	cctatattaaacaggtaaacattgtgtgccaatCATCAAtgttggagattTGTGGGATAATGAACATAAcgtttataatcattggggaggacttgatataa	UA20	UB1	UC1	2680395	2679787	2679787	NA, NA		SAOUHSC_02914, SAOUHSC_02913
U1449	1	2684369	840	M3	0.988011988011988	SigA	0.996003996003996	tttgtttcatatctattaattgacttactgttttCAATGTTATTcaacctcttttTGCAGTATTATTAGAAATAGtataatgaatcttttatagaaaggaa	UA3	UB1	UC1	2684369	2685270	2685270	panE		SAOUHSC_02920
U1450	-1	2684386	484	M3	0.996003996003996	SigA	1	cctgggccgataatcgcaactgataacatcttcTTCTTTCCTTtctataaaagaTTCATTATACTATTTCTAATaatactgcaaaaagaggttgaataaca	UA3	UB1	UC1	2684386	2682303	2682303	panB, panC, panD		SAOUHSC_02919, SAOUHSC_02918, SAOUHSC_02916
U1451	-1	2684532	408	M3	0.925074925074925	SigA	0.999000999000999	tgacatcttcataacctttcacaacaatATCTTGTGCAggtgcatgtggTACAGTATAATATGTTATTGttttggcgtgtctcccgataagcgttgtatga	UA20	UB1	UC1	2684532	2682303	2682303	S1146, panB, panC, panD		new_2684388_2684530_-1, SAOUHSC_02919, SAOUHSC_02918, SAOUHSC_02916
U1452	-1	2686217	1009	M3	0.999000999000999	SigA	0.999000999000999	ggcactgataggtccatttttttagcaaGCATTGATAGaggcaatacttTTGCGTAAAATAATAATTGAataaagtattatgactcgtgaaaatttagtga	UA141	UB17	UC1	2686217	2685397	2685397	S1147, budA2		new_2686069_2686217_-1, SAOUHSC_02921
[truncated: 71 more rows]

## Sheet: legend
		Id	Unique up-shift identifier (U1 to U1523)
[truncated: 18 more rows]
